# Supplementary material for: Precise Nanochemistry of Spherical Aluminum Oxo Clusters for Accurate Surface Guest Recognition and Release
Source: Research Square preprint supplement (doi:10.21203/rs.3.rs-4948547/v1), 2024-11-06

## checkCIF/PLATON report

Structure factors have been supplied for datablock(s) SAIOC-1@G1

THIS REPORT IS FOR GUIDANCE ONLY. IF USED AS PART OF A REVIEW PROCEDURE FOR PUBLICATION, IT SHOULD NOT REPLACE THE EXPERTISE OF AN EXPERIENCED CRYSTALLOGRAPHIC REFEREE.

No syntax errors found.      CIF dictionary      Interpreting this report

### Datablock: SAIOC-1@G1

---

|                        |                                                                |                                                 |                           |
|------------------------|----------------------------------------------------------------|-------------------------------------------------|---------------------------|
| Bond precision:        | C-C = 0.0450 A                                                 | Wavelength=1.34050                              |                           |
| Cell:                  | a=29.9874 (5)<br>alpha=90                                      | b=29.9874 (5)<br>beta=90                        | c=19.1527 (6)<br>gamma=90 |
| Temperature:           | 100 K                                                          |                                                 |                           |
|                        | Calculated                                                     | Reported                                        |                           |
| Volume                 | 17223.0 (8)                                                    | 17223.0 (8)                                     |                           |
| Space group            | P 4/n                                                          | P 4/n                                           |                           |
| Hall group             | -P 4a                                                          | -P 4a                                           |                           |
| Moiety formula         | C216 H364 Al32 N12 O110 Pb6<br>S12, 3(C4 H8 O2) [+<br>solvent] | C216 H364 Al32 N12 O110 Pb6<br>S12, 3(C4 H8 O2) |                           |
| Sum formula            | C228 H388 Al32 N12 O116 Pb6<br>S12 [+ solvent]                 | C228 H388 Al32 N12 O116 Pb6<br>S12              |                           |
| Mr                     | 7644.81                                                        | 7644.70                                         |                           |
| Dx, g cm <sup>-3</sup> | 1.474                                                          | 1.474                                           |                           |
| Z                      | 2                                                              | 2                                               |                           |
| Mu (mm <sup>-1</sup> ) | 5.161                                                          | 5.306                                           |                           |
| F000                   | 7736.0                                                         | 7736.0                                          |                           |
| F000'                  | 7715.40                                                        |                                                 |                           |
| h, k, lmax             | 35, 35, 22                                                     | 35, 35, 22                                      |                           |
| Nref                   | 14689                                                          | 14441                                           |                           |
| Tmin, Tmax             |                                                                | 1.000, 1.000                                    |                           |
| Tmin'                  |                                                                |                                                 |                           |

Correction method= # Reported T Limits: Tmin=1.000 Tmax=1.000  
AbsCorr = SPHERE

Data completeness= 0.983      Theta(max)= 52.046

R(reflections)= 0.1275( 7541)

wR2(reflections)=  
0.3416( 14441)

S = 1.047

Npar= 916

---

The following ALERTS were generated. Each ALERT has the format  
**test-name\_ALERT\_alert-type\_alert-level**.  
Click on the hyperlinks for more details of the test.

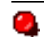

#### Alert level A

PLAT973\_ALERT\_2\_A Check Calcd Positive Resid. Density on Pb32 2.98 eA-3

**Author Response:** These alerts are generated because of residual density peaks near the heaviest atoms in the structure, due to fourier termination ripples. After inspection, the residual electron density peak does not make chemical sense and will not affect the correct identification of the structure.

PLAT973\_ALERT\_2\_A Check Calcd Positive Resid. Density on Pb3 2.76 eA-3

**Author Response:** These alerts are generated because of residual density peaks near the heaviest atoms in the structure, due to fourier termination ripples. After inspection, the residual electron density peak does not make chemical sense and will not affect the correct identification of the structure.

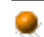

#### Alert level B

PLAT241\_ALERT\_2\_B High 'MainMol' Ueq as Compared to Neighbors of C6 Check

**Author Response:** These alerts are generated because of a slight unresolved disorder caused by free rotation of the flexible chain at the end of the ligand. Some refi commands such as DELU, SIMU and ISOR were used to address such abnormal Ueq value, but failed. After inspection, this does not affect the correct assign of atom types.

PLAT241\_ALERT\_2\_B High 'MainMol' Ueq as Compared to Neighbors of C58 Check

**Author Response:** These alerts are generated because of a slight unresolved disorder caused by free rotation of the flexible chain at the end of the ligand. Some refi commands such as DELU, SIMU and ISOR were used to address such abnormal Ueq value, but failed. After inspection, this does not affect the correct assign of atom types.

PLAT242\_ALERT\_2\_B Low 'MainMol' Ueq as Compared to Neighbors of O4 Check

**Author Response:** These alerts are generated because of a slight unresolved disorder caused by free rotation of the flexible chain at the end of the ligand. Some refi commands such as DELU, SIMU and ISOR were used to address such abnormal Ueq value, but failed. After inspection, this does not affect the correct assign of atom types.

PLAT242\_ALERT\_2\_B Low 'MainMol' Ueq as Compared to Neighbors of N1 Check

**Author Response:** These alerts are generated because of a slight unresolved disorder caused by free rotation of the flexible chain at the end of the ligand. Some refi commands such as DELU, SIMU and ISOR were used to address such abnormal Ueq value, but failed. After inspection, this does not affect the correct assign of atom types.

PLAT242\_ALERT\_2\_B Low 'MainMol' Ueq as Compared to Neighbors of N3 Check

**Author Response:** These alerts are generated because of a slight unresolved disorder caused by free rotation of the flexible chain at the end of the ligand. Some refi commands such as DELU, SIMU and ISOR were used to address such abnormal Ueq value, but failed. After inspection, this does not affect the correct assign of atom types.

PLAT242\_ALERT\_2\_B Low 'MainMol' Ueq as Compared to Neighbors of C36 Check

**Author Response:** These alerts are generated because of a slight unresolved disorder caused by free rotation of the flexible chain at the end of the ligand. Some refi commands such as DELU, SIMU and ISOR were used to address such abnormal Ueq value, but failed. After inspection, this does not affect the correct assign of atom types.

PLAT242\_ALERT\_2\_B Low 'MainMol' Ueq as Compared to Neighbors of C39 Check

**Author Response:** These alerts are generated because of a slight unresolved disorder caused by free rotation of the flexible chain at the end of the ligand. Some refi commands such as DELU, SIMU and ISOR were used to address such abnormal Ueq value, but failed. After inspection, this does not affect the correct assign of atom types.

PLAT242\_ALERT\_2\_B Low 'MainMol' Ueq as Compared to Neighbors of C43 Check

**Author Response:** These alerts are generated because of a slight unresolved disorder caused by free rotation of the flexible chain at the end of the ligand. Some refi commands such as DELU, SIMU and ISOR were used to address such abnormal Ueq value, but failed. After inspection, this does not affect the correct assign of atom types.

PLAT342\_ALERT\_3\_B Low Bond Precision on C-C Bonds ..... 0.045 Ang.

**Author Response:** These alerts are generated because of a slight unresolved disorder caused by free rotation of the flexible chain at the end of the ligand. Some refi commands such as DELU, SIMU and ISOR were used to address such abnormal Ueq value, but failed. After inspection, this does not affect the correct assign of atom types.

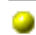

#### Alert level C

RADNW01\_ALERT\_1\_C The radiation wavelength lies outside the expected range  
for the supplied radiation type. Expected range 1.34130-1.34150  
Wavelength given = 1.34050

THETM01\_ALERT\_3\_C The value of sine(theta\_max)/wavelength is less than 0.590  
Calculated sin(theta\_max)/wavelength = 0.5882

|                                                                    |      |        |
|--------------------------------------------------------------------|------|--------|
| PLAT082_ALERT_2_C High R1 Value .....                              | 0.13 | Report |
| PLAT084_ALERT_3_C High wR2 Value (i.e. > 0.25) .....               | 0.34 | Report |
| PLAT094_ALERT_2_C Ratio of Maximum / Minimum Residual Density .... | 2.81 | Report |
| PLAT213_ALERT_2_C Atom C38 has ADP max/min Ratio .....             | 3.5  | prolat |
| PLAT220_ALERT_2_C NonSolvent Resd 1 C Ueq(max)/Ueq(min) Range      | 3.4  | Ratio  |
| PLAT220_ALERT_2_C NonSolvent Resd 1 O Ueq(max)/Ueq(min) Range      | 3.5  | Ratio  |
| PLAT222_ALERT_3_C NonSolvent Resd 1 H Uiso(max)/Uiso(min) Range    | 4.5  | Ratio  |
| PLAT241_ALERT_2_C High 'MainMol' Ueq as Compared to Neighbors of   | S1   | Check  |

**Author Response:** These alerts are generated because of a slight unresolved disorder caused by free rotation of the flexible chain at the end of the ligand. Some refi commands such as DELU, SIMU and ISOR were used to address such abnormal Ueq value, but failed. After inspection, this does not affect the correct assign of atom types.

PLAT241\_ALERT\_2\_C High 'MainMol' Ueq as Compared to Neighbors of 07 Check

**Author Response:** These alerts are generated because of a slight unresolved disorder caused by free rotation of the flexible chain at the end of the ligand. Some refi commands such as DELU, SIMU and ISOR were used to address such abnormal Ueq value, but failed. After inspection, this does not affect the correct assign of atom types.

PLAT241\_ALERT\_2\_C High 'MainMol' Ueq as Compared to Neighbors of C11 Check

**Author Response:** These alerts are generated because of a slight unresolved disorder caused by free rotation of the flexible chain at the end of the ligand. Some refi commands such as DELU, SIMU and ISOR were used to address such abnormal Ueq value, but failed. After inspection, this does not affect the correct assign of atom types.

PLAT241\_ALERT\_2\_C High 'MainMol' Ueq as Compared to Neighbors of C13 Check

**Author Response:** These alerts are generated because of a slight unresolved disorder caused by free rotation of the flexible chain at the end of the ligand. Some refi commands such as DELU, SIMU and ISOR were used to address such abnormal Ueq value, but failed. After inspection, this does not affect the correct assign of atom types.

PLAT241\_ALERT\_2\_C High 'MainMol' Ueq as Compared to Neighbors of C17 Check

**Author Response:** These alerts are generated because of a slight unresolved disorder caused by free rotation of the flexible chain at the end of the ligand. Some refi commands such as DELU, SIMU and ISOR were used to address such abnormal Ueq value, but failed. After inspection, this does not affect the correct assign of atom types.

PLAT241\_ALERT\_2\_C High 'MainMol' Ueq as Compared to Neighbors of C18 Check

**Author Response:** These alerts are generated because of a slight unresolved disorder caused by free rotation of the flexible chain at the end of the ligand. Some refi commands such as DELU, SIMU and ISOR were used to address such abnormal Ueq value, but failed. After inspection, this does not affect the correct assign of atom types.

PLAT241\_ALERT\_2\_C High 'MainMol' Ueq as Compared to Neighbors of C30 Check

**Author Response:** These alerts are generated because of a slight unresolved disorder caused by free rotation of the flexible chain at the end of the ligand. Some refi commands such as DELU, SIMU and ISOR were used to address such abnormal Ueq value, but failed. After inspection, this does not affect the correct assign of atom types.

PLAT241\_ALERT\_2\_C High 'MainMol' Ueq as Compared to Neighbors of C31 Check

**Author Response:** These alerts are generated because of a slight unresolved disorder caused by free rotation of the flexible chain at the end of the ligand. Some refi commands such as DELU, SIMU and ISOR were used to address such abnormal Ueq value, but failed. After inspection, this does not affect the correct assign of atom types.

PLAT241\_ALERT\_2\_C High 'MainMol' Ueq as Compared to Neighbors of C57 Check

**Author Response:** These alerts are generated because of a slight unresolved disorder caused by free rotation of the flexible chain at the end of the ligand. Some refi commands such as DELU, SIMU and ISOR were used to address such abnormal Ueq value, but failed. After inspection, this does not affect the correct assign of atom types.

PLAT242\_ALERT\_2\_C Low 'MainMol' Ueq as Compared to Neighbors of S2 Check

**Author Response:** These alerts are generated because of a slight unresolved disorder caused by free rotation of the flexible chain at the end of the ligand. Some refi commands such as DELU, SIMU and ISOR were used to address such abnormal Ueq value, but failed. After inspection, this does not affect the correct assign of atom types.

PLAT242\_ALERT\_2\_C Low 'MainMol' Ueq as Compared to Neighbors of N2 Check

**Author Response:** These alerts are generated because of a slight unresolved disorder caused by free rotation of the flexible chain at the end of the ligand. Some refi commands such as DELU, SIMU and ISOR were used to address such abnormal Ueq value, but failed. After inspection, this does not affect the correct assign of atom types.

PLAT242\_ALERT\_2\_C Low 'MainMol' Ueq as Compared to Neighbors of C12 Check

**Author Response:** These alerts are generated because of a slight unresolved disorder caused by free rotation of the flexible chain at the end of the ligand. Some refi commands such as DELU, SIMU and ISOR were used to address such abnormal Ueq value, but failed. After inspection, this does not affect the correct assign of atom types.

PLAT242\_ALERT\_2\_C Low 'MainMol' Ueq as Compared to Neighbors of C46 Check

**Author Response:** These alerts are generated because of a slight unresolved disorder caused by free rotation of the flexible chain at the end of the ligand. Some refi commands such as DELU, SIMU and ISOR were used to address such abnormal Ueq value, but failed. After inspection, this does not affect the correct assign of atom types.

PLAT242\_ALERT\_2\_C Low 'MainMol' Ueq as Compared to Neighbors of C49 Check

**Author Response:** These alerts are generated because of a slight unresolved disorder caused by free rotation of the flexible chain at the end of the ligand. Some refi commands such as DELU, SIMU and ISOR were used to address such abnormal Ueq value, but failed. After inspection, this does not affect the correct assign of atom types.

|                   |          |               |         |         |         |           |        |          |       |
|-------------------|----------|---------------|---------|---------|---------|-----------|--------|----------|-------|
| PLAT260_ALERT_2_C | Large    | Average       | Ueq     | of      | Residue | Including | Pb1    | 0.171    | Check |
| PLAT260_ALERT_2_C | Large    | Average       | Ueq     | of      | Residue | Including | O1     | 0.217    | Check |
| PLAT360_ALERT_2_C | Short    | C(sp3)-C(sp3) | Bond    | C36     | -       | C37       | .      | 1.39     | Ang.  |
| PLAT360_ALERT_2_C | Short    | C(sp3)-C(sp3) | Bond    | C42     | -       | C43       | .      | 1.43     | Ang.  |
| PLAT410_ALERT_2_C | Short    | Intra H...H   | Contact | H17B    | ..      | H18B      | .      | 1.92     | Ang.  |
|                   |          |               |         |         | x,y,z   | =         | 1_555  | Check    |       |
| PLAT410_ALERT_2_C | Short    | Intra H...H   | Contact | H57A    | ..      | H58B      | .      | 1.91     | Ang.  |
|                   |          |               |         |         | x,y,z   | =         | 1_555  | Check    |       |
| PLAT905_ALERT_3_C | Negative | K             | value   | in      | the     | Analysis  | of     | Variance | ...   |
| PLAT906_ALERT_3_C | Large    | K             | Value   | in      | the     | Analysis  | of     | Variance | ..... |
| PLAT906_ALERT_3_C | Large    | K             | Value   | in      | the     | Analysis  | of     | Variance | ..... |
| PLAT911_ALERT_3_C | Missing  | FCF           | Refl    | Between | Thmin   | &         | STh/L= | 0.588    | 248   |
|                   | 2        | 2             | 0,      | -2      | 4       | 0,        | 4      | 4        | 0,    |
|                   | -3       | 25            | 0,      | 7       | 27      | 0,        | 2      | 28       | 0,    |
|                   | -8       | 30            | 0,      | -6      | 30      | 0,        | -9     | 31       | 0,    |
|                   | 3        | 33            | 0,      | 0       | 34      | 0,        | 2      | 34       | 0,    |
|                   | 1        | 2             | 1,      | 1       | 3       | 1,        | -2     | 4        | 1,    |
|                   | -3       | 7             | 1,      | -2      | 7       | 1,        | -1     | 23       | 1,    |
|                   | 1        | 25            | 1,      | -2      | 26      | 1,        | -1     | 26       | 1,    |
|                   | 0        | 27            | 1,      | 7       | 27      | 1,        | 13     | 27       | 1,    |
|                   | 14       | 28            | 1,      | 16      | 28      | 1,        | -8     | 29       | 1,    |
|                   | -1       | 30            | 1,      | 0       | 30      | 1,        | 13     | 30       | 1,    |
|                   | -3       | 31            | 1,      | -2      | 31      | 1,        | -9     | 32       | 1,    |
|                   | -8       | 33            | 1,      | -7      | 33      | 1,        | -6     | 33       | 1,    |
|                   | -5       | 34            | 1,      | 1       | 34      | 1,        | 2      | 34       | 1,    |
|                   | 1        | 2             | 2,      | 1       | 5       | 2,        | -1     | 6        | 2,    |
|                   | 0        | 23            | 2,      | 1       | 24      | 2,        | -3     | 25       | 2,    |
|                   | -2       | 26            | 2,      | 0       | 26      | 2,        | -5     | 27       | 2,    |
| PLAT971_ALERT_2_C | Check    | Calcd         | Resid.  | Dens.   | 0.24Ang | From      | Pb1    | 2.09     | eA-3  |
| PLAT971_ALERT_2_C | Check    | Calcd         | Resid.  | Dens.   | 1.03Ang | From      | Pb32   | 1.83     | eA-3  |
| PLAT971_ALERT_2_C | Check    | Calcd         | Resid.  | Dens.   | 1.12Ang | From      | Pb32   | 1.77     | eA-3  |
| PLAT971_ALERT_2_C | Check    | Calcd         | Resid.  | Dens.   | 1.17Ang | From      | C52    | 1.72     | eA-3  |
| PLAT971_ALERT_2_C | Check    | Calcd         | Resid.  | Dens.   | 1.20Ang | From      | Pb32   | 1.64     | eA-3  |
| PLAT971_ALERT_2_C | Check    | Calcd         | Resid.  | Dens.   | 1.01Ang | From      | Pb32   | 1.59     | eA-3  |
| PLAT971_ALERT_2_C | Check    | Calcd         | Resid.  | Dens.   | 1.18Ang | From      | Pb3    | 1.57     | eA-3  |

Alert level G

ABSMU01\_ALERT 1 G Calculation of exptl absorpt correction mu

|                                        |                                                                          |                |               |
|----------------------------------------|--------------------------------------------------------------------------|----------------|---------------|
| not performed for this radiation type. |                                                                          |                |               |
| PLAT002_ALERT_2_G                      | Number of Distance or Angle Restraints on AtSite                         |                | 30 Note       |
| PLAT003_ALERT_2_G                      | Number of Uiso or U(i,j) Restrained non-H Atoms                          |                | 39 Report     |
| PLAT007_ALERT_5_G                      | Number of Unrefined Donor-H Atoms .....                                  |                | 2 Report      |
|                                        | H5      H19                                                              |                |               |
| PLAT051_ALERT_1_G                      | Mu(calc) and Mu(CIF) Ratio Differs from 1.0 by .                         |                | 2.74 %        |
| PLAT083_ALERT_2_G                      | SHELXL Second Parameter in WGHT Unusually Large                          |                | 335.04 Why ?  |
| PLAT172_ALERT_4_G                      | The CIF-Embedded .res File Contains DFIX Records                         |                | 29 Report     |
| PLAT177_ALERT_4_G                      | The CIF-Embedded .res File Contains DELU Records                         |                | 4 Report      |
| PLAT178_ALERT_4_G                      | The CIF-Embedded .res File Contains SIMU Records                         |                | 4 Report      |
| PLAT186_ALERT_4_G                      | The CIF-Embedded .res File Contains ISOR Records                         |                | 1 Report      |
| PLAT187_ALERT_4_G                      | The CIF-Embedded .res File Contains RIGU Records                         |                | 1 Report      |
| PLAT188_ALERT_3_G                      | A Non-default SIMU Restraint Value has been used                         |                | 0.0100 Report |
| PLAT188_ALERT_3_G                      | A Non-default SIMU Restraint Value has been used                         |                | 0.0100 Report |
| PLAT188_ALERT_3_G                      | A Non-default SIMU Restraint Value has been used                         |                | 0.0100 Report |
| PLAT188_ALERT_3_G                      | A Non-default SIMU Restraint Value has been used                         |                | 0.0100 Report |
| PLAT190_ALERT_3_G                      | A Non-default RIGU Restraint Value for First Par                         |                | 0.0100 Report |
| PLAT190_ALERT_3_G                      | A Non-default RIGU Restraint Value for SecondPar                         |                | 0.0200 Report |
| PLAT192_ALERT_3_G                      | A Non-default DELU Restraint Value for SecondPar                         |                | 0.0200 Report |
| PLAT192_ALERT_3_G                      | A Non-default DELU Restraint Value for SecondPar                         |                | 0.0200 Report |
| PLAT192_ALERT_3_G                      | A Non-default DELU Restraint Value for SecondPar                         |                | 0.0200 Report |
| PLAT192_ALERT_3_G                      | A Non-default DELU Restraint Value for SecondPar                         |                | 0.0200 Report |
| PLAT299_ALERT_4_G                      | Atom Site Occupancy Constrained at .....                                 |                | 0.5 Check     |
|                                        | C34      C35      H33A      H33B      H33C      H33D      H34A      H34B |                |               |
|                                        | H34C      H35A      H35B      H35C                                       |                |               |
| PLAT300_ALERT_4_G                      | Atom Site Occupancy of O1                                                | Constrained at | 0.75 Check    |
| PLAT300_ALERT_4_G                      | Atom Site Occupancy of O2                                                | Constrained at | 0.75 Check    |
| PLAT300_ALERT_4_G                      | Atom Site Occupancy of C1                                                | Constrained at | 0.75 Check    |
| PLAT300_ALERT_4_G                      | Atom Site Occupancy of C2                                                | Constrained at | 0.75 Check    |
| PLAT300_ALERT_4_G                      | Atom Site Occupancy of C3                                                | Constrained at | 0.75 Check    |
| PLAT300_ALERT_4_G                      | Atom Site Occupancy of C4                                                | Constrained at | 0.75 Check    |
| PLAT300_ALERT_4_G                      | Atom Site Occupancy of H1A                                               | Constrained at | 0.75 Check    |
| PLAT300_ALERT_4_G                      | Atom Site Occupancy of H1B                                               | Constrained at | 0.75 Check    |
| PLAT300_ALERT_4_G                      | Atom Site Occupancy of H2A                                               | Constrained at | 0.75 Check    |
| PLAT300_ALERT_4_G                      | Atom Site Occupancy of H2B                                               | Constrained at | 0.75 Check    |
| PLAT300_ALERT_4_G                      | Atom Site Occupancy of H3A                                               | Constrained at | 0.75 Check    |
| PLAT300_ALERT_4_G                      | Atom Site Occupancy of H3B                                               | Constrained at | 0.75 Check    |
| PLAT300_ALERT_4_G                      | Atom Site Occupancy of H4A                                               | Constrained at | 0.75 Check    |
| PLAT300_ALERT_4_G                      | Atom Site Occupancy of H4B                                               | Constrained at | 0.75 Check    |
| PLAT301_ALERT_3_G                      | Main Residue Disorder .....                                              | (Resd 1)       | 1% Note       |
| PLAT302_ALERT_4_G                      | Anion/Solvent/Minor-Residue Disorder (Resd 2)                            |                | 100% Note     |
| PLAT304_ALERT_4_G                      | Non-Integer Number of Atoms in ....                                      | (Resd 2)       | 10.50 Check   |
| PLAT398_ALERT_2_G                      | Deviating C-O-C Angle From 120 for O1                                    |                | 106.2 Degree  |
| PLAT605_ALERT_4_G                      | Largest Solvent Accessible VOID in the Structure                         |                | 141 A**3      |
| PLAT720_ALERT_4_G                      | Number of Unusual/Non-Standard Labels .....                              |                | 3 Note        |
|                                        | O0I      O0O      O013                                                   |                |               |
| PLAT721_ALERT_1_G                      | Bond Calc 0.97000, Rep 0.98020 Dev...                                    |                | 0.01 Ang.     |
|                                        | C35 -H35B 1_555 1_555 .....                                              | # 200          | Check         |
| PLAT721_ALERT_1_G                      | Bond Calc 0.99000, Rep 0.97980 Dev...                                    |                | 0.01 Ang.     |
|                                        | C35 -H35C 1_555 1_555 .....                                              | # 201          | Check         |
| PLAT721_ALERT_1_G                      | Bond Calc 1.00000, Rep 0.98000 Dev...                                    |                | 0.02 Ang.     |
|                                        | C34 -H34C 1_555 1_555 .....                                              | # 204          | Check         |
| PLAT721_ALERT_1_G                      | Bond Calc 0.97000, Rep 0.98020 Dev...                                    |                | 0.01 Ang.     |
|                                        | C15 -H15B 1_555 1_555 .....                                              | # 229          | Check         |
| PLAT721_ALERT_1_G                      | Bond Calc 0.99000, Rep 0.97990 Dev...                                    |                | 0.01 Ang.     |
|                                        | C15 -H15C 1_555 1_555 .....                                              | # 230          | Check         |
| PLAT722_ALERT_1_G                      | Angle Calc 108.00, Rep 106.80 Dev...                                     |                | 1.20 Degree   |



|                   |                                                            |                      |                             |         |          |          |         |             |
|-------------------|------------------------------------------------------------|----------------------|-----------------------------|---------|----------|----------|---------|-------------|
| C33               | -C35                                                       | -H35B                | 1_555                       | 1_555   | 1_555    | #        | 486     | Check       |
| PLAT722_ALERT_1_G | Angle                                                      | Calc                 | 108.00,                     | Rep     | 109.50   | Dev...   |         | 1.50 Degree |
| H35A              | -C35                                                       | -H35C                | 1_555                       | 1_555   | 1_555    | #        | 489     | Check       |
| PLAT722_ALERT_1_G | Angle                                                      | Calc                 | 108.00,                     | Rep     | 109.50   | Dev...   |         | 1.50 Degree |
| C33               | -C34                                                       | -H34C                | 1_555                       | 1_555   | 1_555    | #        | 493     | Check       |
| PLAT722_ALERT_1_G | Angle                                                      | Calc                 | 111.00,                     | Rep     | 109.50   | Dev...   |         | 1.50 Degree |
| H34A              | -C34                                                       | -H34B                | 1_555                       | 1_555   | 1_555    | #        | 494     | Check       |
| PLAT722_ALERT_1_G | Angle                                                      | Calc                 | 107.00,                     | Rep     | 105.90   | Dev...   |         | 1.10 Degree |
| C19               | -C20                                                       | -H20C                | 1_555                       | 1_555   | 1_555    | #        | 556     | Check       |
| PLAT794_ALERT_5_G | Tentative                                                  | Bond Valency for Pb1 |                             | (II)    | .        |          | 2.06    | Info        |
| PLAT794_ALERT_5_G | Tentative                                                  | Bond Valency for Pb3 |                             | (II)    | .        |          | 2.05    | Info        |
| PLAT794_ALERT_5_G | Tentative                                                  | Bond Valency for Al1 |                             | (III)   | .        |          | 2.93    | Info        |
| PLAT794_ALERT_5_G | Tentative                                                  | Bond Valency for Al2 |                             | (III)   | .        |          | 2.85    | Info        |
| PLAT794_ALERT_5_G | Tentative                                                  | Bond Valency for Al3 |                             | (III)   | .        |          | 2.91    | Info        |
| PLAT794_ALERT_5_G | Tentative                                                  | Bond Valency for Al4 |                             | (III)   | .        |          | 2.75    | Info        |
| PLAT794_ALERT_5_G | Tentative                                                  | Bond Valency for Al6 |                             | (III)   | .        |          | 2.81    | Info        |
| PLAT794_ALERT_5_G | Tentative                                                  | Bond Valency for Al8 |                             | (III)   | .        |          | 2.80    | Info        |
| PLAT802_ALERT_4_G | CIF Input Record(s) with more than 80 Characters           |                      |                             |         |          |          | 6       | Info        |
| PLAT860_ALERT_3_G | Number of Least-Squares Restraints .....                   |                      |                             |         |          |          | 500     | Note        |
| PLAT868_ALERT_4_G | ALERTS Due to the Use of _smtbx_masks Suppressed           |                      |                             |         |          |          | !       | Info        |
| PLAT933_ALERT_2_G | Number of HKL-OMIT Records in Embedded .res File           |                      |                             |         |          |          | 29      | Note        |
|                   | 0 1 2,                                                     | 0 3 3,               | 1 1 1,                      | 4 30 2, | 5 5 1,   | -1 35 2, |         |             |
|                   | -4 5 1,                                                    | 1 3 1,               | 0 34 3,                     | -1 6 2, | 4 4 0,   | 3 30 4,  |         |             |
|                   | 3 31 3,                                                    | 1 33 3,              | -1 35 0,                    | 2 2 0,  | -1 35 1, | -1 34 4, |         |             |
|                   | 0 34 2,                                                    | -3 7 1,              | -19 20 4,                   | 1 33 2, | -2 4 0,  | -2 4 4,  |         |             |
|                   | -2 7 1,                                                    | -1 6 1,              | 1 2 2,                      | -2 4 1, | 0 34 0,  |          |         |             |
| PLAT941_ALERT_3_G | Average HKL Measurement Multiplicity .....                 |                      |                             |         |          |          | 3.4     | Low         |
| PLAT969_ALERT_5_G | The 'Henn et al.' R-Factor-gap value .....                 |                      |                             |         |          |          | 5.443   | Note        |
|                   | Predicted wR2: Based on SigI**2 6.28 or SHELX Weight 32.63 |                      |                             |         |          |          |         |             |
| PLAT978_ALERT_2_G | Number C-C Bonds with Positive Residual Density.           |                      |                             |         |          |          | 0       | Info        |
| PLAT984_ALERT_1_G | The C-f' =                                                 | 0.0147               | Deviates from the B&C-Value |         |          |          | 0.0137  | Check       |
| PLAT984_ALERT_1_G | The N-f' =                                                 | 0.0253               | Deviates from the B&C-Value |         |          |          | 0.0241  | Check       |
| PLAT984_ALERT_1_G | The O-f' =                                                 | 0.0412               | Deviates from the B&C-Value |         |          |          | 0.0389  | Check       |
| PLAT984_ALERT_1_G | The Pb-f' =                                                | -4.2646              | Deviates from the B&C-Value |         |          |          | -4.4950 | Check       |
| PLAT985_ALERT_1_G | The Al-f" =                                                | 0.1843               | Deviates from the B&C-Value |         |          |          | 0.1873  | Check       |
| PLAT985_ALERT_1_G | The Pb-f" =                                                | 7.1982               | Deviates from the B&C-Value |         |          |          | 6.8412  | Check       |
| PLAT985_ALERT_1_G | The S-f" =                                                 | 0.4242               | Deviates from the B&C-Value |         |          |          | 0.4295  | Check       |

---

2 **ALERT level A** = Most likely a serious problem - resolve or explain  
9 **ALERT level B** = A potentially serious problem, consider carefully  
40 **ALERT level C** = Check. Ensure it is not caused by an omission or oversight  
74 **ALERT level G** = General information/check it is not something unexpected

20 ALERT type 1 CIF construction/syntax error, inconsistent or missing data  
48 ALERT type 2 Indicator that the structure model may be wrong or deficient  
21 ALERT type 3 Indicator that the structure quality may be low  
26 ALERT type 4 Improvement, methodology, query or suggestion  
10 ALERT type 5 Informative message, check

---

## checkCIF publication errors

---

## Alert level A

PUBL004\_ALERT\_1\_A The contact author's name and address are missing,  
\_publ\_contact\_author\_name and \_publ\_contact\_author\_address.  
PUBL005\_ALERT\_1\_A \_publ\_contact\_author\_email, \_publ\_contact\_author\_fax and  
\_publ\_contact\_author\_phone are all missing.  
At least one of these should be present.  
PUBL006\_ALERT\_1\_A \_publ\_requested\_journal is missing  
e.g. 'Acta Crystallographica Section C'  
PUBL008\_ALERT\_1\_A \_publ\_section\_title is missing. Title of paper.  
PUBL009\_ALERT\_1\_A \_publ\_author\_name is missing. List of author(s) name(s).  
PUBL010\_ALERT\_1\_A \_publ\_author\_address is missing. Author(s) address(es).  
PUBL012\_ALERT\_1\_A \_publ\_section\_abstract is missing.  
Abstract of paper in English.

---

7 **ALERT level A** = Data missing that is essential or data in wrong format  
0 **ALERT level G** = General alerts. Data that may be required is missing

---

## Publication of your CIF

You should attempt to resolve as many as possible of the alerts in all categories. Often the minor alerts point to easily fixed oversights, errors and omissions in your CIF or refinement strategy, so attention to these fine details can be worthwhile. In order to resolve some of the more serious problems it may be necessary to carry out additional measurements or structure refinements. However, the nature of your study may justify the reported deviations from journal submission requirements and the more serious of these should be commented upon in the discussion or experimental section of a paper or in the "special\_details" fields of the CIF. *checkCIF* was carefully designed to identify outliers and unusual parameters, but every test has its limitations and alerts that are not important in a particular case may appear. Conversely, the absence of alerts does not guarantee there are no aspects of the results needing attention. It is up to the individual to critically assess their own results and, if necessary, seek expert advice.

If level A alerts remain, which you believe to be justified deviations, and you intend to submit this CIF for publication in a journal, you should additionally insert an explanation in your CIF using the Validation Reply Form (VRF) below. This will allow your explanation to be considered as part of the review process.

## Validation response form

Please find below a validation response form (VRF) that can be filled in and pasted into your CIF.

```
# start Validation Reply Form
_vrf_PUBL004_GLOBAL
;
PROBLEM: The contact author's name and address are missing,
RESPONSE: ...
;
_vrf_PUBL005_GLOBAL
;
```

```

PROBLEM: _publ_contact_author_email, _publ_contact_author_fax and
RESPONSE: ...
;
_vrf_PUBL006_GLOBAL
;
PROBLEM: _publ_requested_journal is missing
RESPONSE: ...
;
_vrf_PUBL008_GLOBAL
;
PROBLEM: _publ_section_title is missing. Title of paper.
RESPONSE: ...
;
_vrf_PUBL009_GLOBAL
;
PROBLEM: _publ_author_name is missing. List of author(s) name(s).
RESPONSE: ...
;
_vrf_PUBL010_GLOBAL
;
PROBLEM: _publ_author_address is missing. Author(s) address(es).
RESPONSE: ...
;
_vrf_PUBL012_GLOBAL
;
PROBLEM: _publ_section_abstract is missing.
RESPONSE: ...
;
# end Validation Reply Form

```

If you wish to submit your CIF for publication in Acta Crystallographica Section C or E, you should upload your CIF via the web. If you wish to submit your CIF for publication in IUCrData you should upload your CIF via the web. If your CIF is to form part of a submission to another IUCr journal, you will be asked, either during electronic submission or by the Co-editor handling your paper, to upload your CIF via our web site.

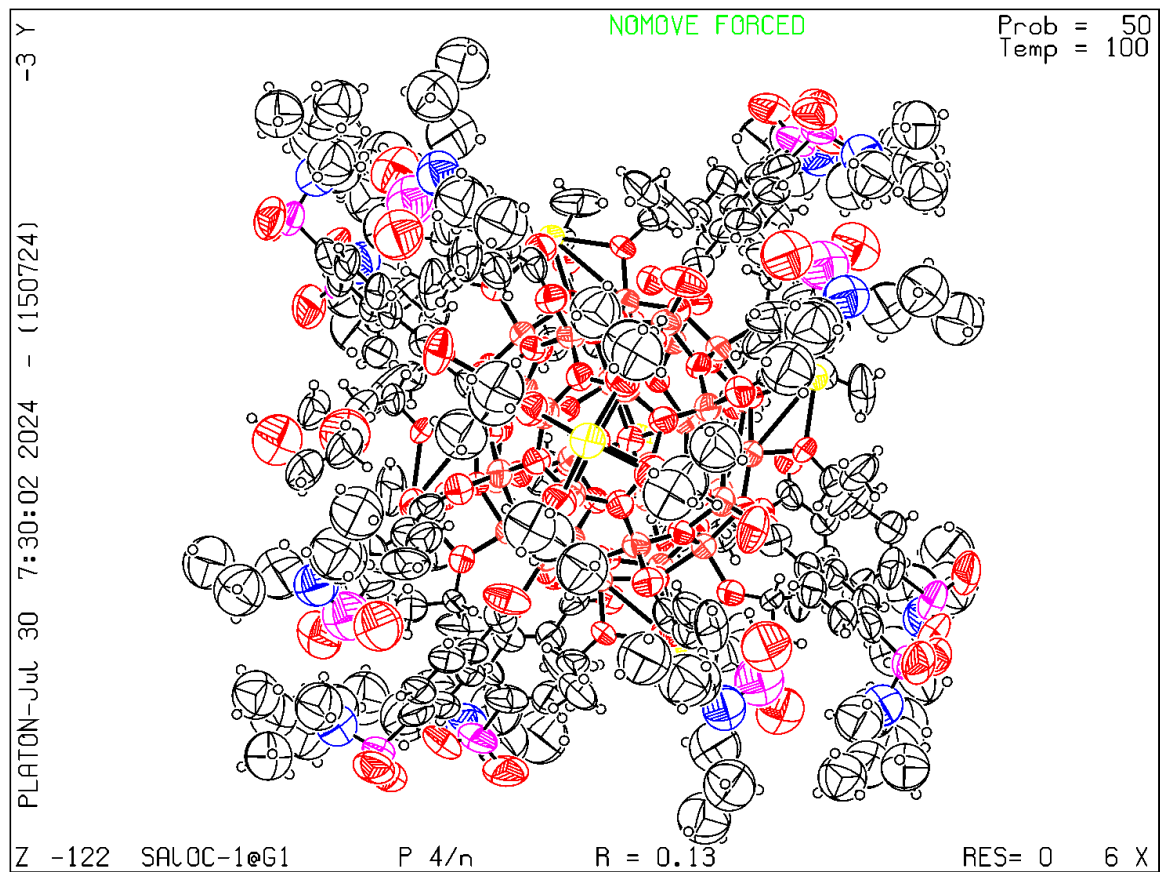

Supplement: Supplementary file 2 [file 0d0fb0725bbd003637042af7.pdf]
