# Supplementary material for: Precise Nanochemistry of Spherical Aluminum Oxo Clusters for Accurate Surface Guest Recognition and Release
Source: Research Square preprint supplement (doi:10.21203/rs.3.rs-4948547/v1), 2024-11-06

## checkCIF/PLATON report

Structure factors have been supplied for datablock(s) SAIOC-1@G5

THIS REPORT IS FOR GUIDANCE ONLY. IF USED AS PART OF A REVIEW PROCEDURE FOR PUBLICATION, IT SHOULD NOT REPLACE THE EXPERTISE OF AN EXPERIENCED CRYSTALLOGRAPHIC REFEREE.

No syntax errors found.      CIF dictionary      Interpreting this report

### Datablock: SAIOC-1@G5

---

|                        |                                                          |                                              |                           |
|------------------------|----------------------------------------------------------|----------------------------------------------|---------------------------|
| Bond precision:        | C-C = 0.0177 Å                                           | Wavelength=1.34050                           |                           |
| Cell:                  | a=30.0020 (4)<br>alpha=90                                | b=30.0020 (4)<br>beta=90                     | c=19.4409 (4)<br>gamma=90 |
| Temperature:           | 100 K                                                    |                                              |                           |
|                        | Calculated                                               | Reported                                     |                           |
| Volume                 | 17499.2 (6)                                              | 17499.1 (6)                                  |                           |
| Space group            | P 4/n                                                    | P 4/n                                        |                           |
| Hall group             | -P 4a                                                    | -P 4a                                        |                           |
| Moiety formula         | C216 H360 Al32 N12 O110 Pb6<br>S12, 2(C6 H6) [+ solvent] | C216 H360 Al32 N12 O110 Pb6<br>S12, 2(C6 H6) |                           |
| Sum formula            | C228 H372 Al32 N12 O110 Pb6<br>S12 [+ solvent]           | C228 H372 Al32 N12 O110 Pb6<br>S12           |                           |
| Mr                     | 7532.68                                                  | 7532.57                                      |                           |
| Dx, g cm <sup>-3</sup> | 1.430                                                    | 1.430                                        |                           |
| Z                      | 2                                                        | 2                                            |                           |
| Mu (mm <sup>-1</sup> ) | 5.066                                                    | 5.208                                        |                           |
| F000                   | 7608.0                                                   | 7608.0                                       |                           |
| F000'                  | 7586.96                                                  |                                              |                           |
| h, k, lmax             | 35, 35, 22                                               | 35, 33, 22                                   |                           |
| Nref                   | 14924                                                    | 14877                                        |                           |
| Tmin, Tmax             |                                                          | 1.000, 1.000                                 |                           |
| Tmin'                  |                                                          |                                              |                           |

Correction method= # Reported T Limits: Tmin=1.000 Tmax=1.000  
AbsCorr = SPHERE

Data completeness= 0.997

Theta (max)= 52.046

R(reflections)= 0.0785( 10320)

wR2(reflections)=  
0.2421( 14877)

S = 1.027

Npar= 928

---

The following ALERTS were generated. Each ALERT has the format  
**test-name\_ALERT\_alert-type\_alert-level**.  
Click on the hyperlinks for more details of the test.

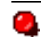

#### **Alert level A**

PLAT971\_ALERT\_2\_A Check Calcd Resid. Dens. 0.86Ang From Pb1

4.59 eA-3

**Author Response:** These alerts are generated because of residual density peaks near the heaviest atoms in the structure, due to fourier termination ripples. After inspection, the residual electron density peak does not make chemical sense and will not affect the correct identification of the structure.

PLAT971\_ALERT\_2\_A Check Calcd Resid. Dens. 1.11Ang From Pb2

3.98 eA-3

**Author Response:** These alerts are generated because of residual density peaks near the heaviest atoms in the structure, due to fourier termination ripples. After inspection, the residual electron density peak does not make chemical sense and will not affect the correct identification of the structure.

PLAT971\_ALERT\_2\_A Check Calcd Resid. Dens. 0.96Ang From Pb1

3.85 eA-3

**Author Response:** These alerts are generated because of residual density peaks near the heaviest atoms in the structure, due to fourier termination ripples. After inspection, the residual electron density peak does not make chemical sense and will not affect the correct identification of the structure.

PLAT971\_ALERT\_2\_A Check Calcd Resid. Dens. 1.08Ang From Pb3

3.77 eA-3

**Author Response:** These alerts are generated because of residual density peaks near the heaviest atoms in the structure, due to fourier termination ripples. After inspection, the residual electron density peak does not make chemical sense and will not affect the correct identification of the structure.

PLAT971\_ALERT\_2\_A Check Calcd Resid. Dens. 0.85Ang From Pb2

3.57 eA-3

**Author Response:** These alerts are generated because of residual density peaks near the heaviest atoms in the structure, due to fourier termination ripples. After inspection, the residual electron density peak does not make chemical sense and will not affect the correct identification of the structure.

PLAT973\_ALERT\_2\_A Check Calcd Positive Resid. Density on Pb1 3.49 eA-3

**Author Response:** These alerts are generated because of residual density peaks near the heaviest atoms in the structure, due to fourier termination ripples. After inspection, the residual electron density peak does not make chemical sense and will not affect the correct identification of the structure.

PLAT973\_ALERT\_2\_A Check Calcd Positive Resid. Density on Pb3 2.09 eA-3

**Author Response:** These alerts are generated because of residual density peaks near the heaviest atoms in the structure, due to fourier termination ripples. After inspection, the residual electron density peak does not make chemical sense and will not affect the correct identification of the structure.

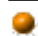

#### Alert level B

PLAT094\_ALERT\_2\_B Ratio of Maximum / Minimum Residual Density .... 4.83 Report

**Author Response:** These alerts are generated because of residual density peaks near the heaviest atoms in the structure, due to fourier termination ripples. After inspection, the residual electron density peak does not make chemical sense and will not affect the correct identification of the structure.

PLAT971\_ALERT\_2\_B Check Calcd Resid. Dens. 1.05Ang From Pb3 3.36 eA-3

**Author Response:** These alerts are generated because of residual density peaks near the heaviest atoms in the structure, due to fourier termination ripples. After inspection, the residual electron density peak does not make chemical sense and will not affect the correct identification of the structure.

PLAT971\_ALERT\_2\_B Check Calcd Resid. Dens. 0.23Ang From Pb2 2.85 eA-3

**Author Response:** These alerts are generated because of residual density peaks near the heaviest atoms in the structure, due to fourier termination ripples. After inspection, the residual electron density peak does not make chemical sense and will not affect the correct identification of the structure.

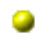

#### Alert level C

RADNW01\_ALERT\_1\_C The radiation wavelength lies outside the expected range for the supplied radiation type. Expected range 1.34130-1.34150 Wavelength given = 1.34050

THETM01\_ALERT\_3\_C The value of sine(theta\_max)/wavelength is less than 0.590 Calculated sin(theta\_max)/wavelength = 0.5882

|                   |                                              |                                  |              |                             |         |        |       |
|-------------------|----------------------------------------------|----------------------------------|--------------|-----------------------------|---------|--------|-------|
| PLAT220_ALERT_2_C | NonSolvent                                   | Resd 1                           | C            | Ueq(max)/Ueq(min)           | Range   | 4.2    | Ratio |
| PLAT220_ALERT_2_C | NonSolvent                                   | Resd 1                           | O            | Ueq(max)/Ueq(min)           | Range   | 3.8    | Ratio |
| PLAT222_ALERT_3_C | NonSolvent                                   | Resd 1                           | H            | Uiso(max)/Uiso(min)         | Range   | 6.3    | Ratio |
| PLAT241_ALERT_2_C | High                                         | 'MainMol'                        | Ueq          | as Compared to Neighbors of |         | C7     | Check |
| PLAT241_ALERT_2_C | High                                         | 'MainMol'                        | Ueq          | as Compared to Neighbors of |         | C33    | Check |
| PLAT241_ALERT_2_C | High                                         | 'MainMol'                        | Ueq          | as Compared to Neighbors of |         | C36    | Check |
| PLAT241_ALERT_2_C | High                                         | 'MainMol'                        | Ueq          | as Compared to Neighbors of |         | C53    | Check |
| PLAT241_ALERT_2_C | High                                         | 'MainMol'                        | Ueq          | as Compared to Neighbors of |         | C56    | Check |
| PLAT242_ALERT_2_C | Low                                          | 'MainMol'                        | Ueq          | as Compared to Neighbors of |         | S1     | Check |
| PLAT242_ALERT_2_C | Low                                          | 'MainMol'                        | Ueq          | as Compared to Neighbors of |         | N1     | Check |
| PLAT242_ALERT_2_C | Low                                          | 'MainMol'                        | Ueq          | as Compared to Neighbors of |         | N2     | Check |
| PLAT242_ALERT_2_C | Low                                          | 'MainMol'                        | Ueq          | as Compared to Neighbors of |         | N3     | Check |
| PLAT242_ALERT_2_C | Low                                          | 'MainMol'                        | Ueq          | as Compared to Neighbors of |         | C19    | Check |
| PLAT242_ALERT_2_C | Low                                          | 'MainMol'                        | Ueq          | as Compared to Neighbors of |         | C22    | Check |
| PLAT242_ALERT_2_C | Low                                          | 'MainMol'                        | Ueq          | as Compared to Neighbors of |         | C40    | Check |
| PLAT242_ALERT_2_C | Low                                          | 'MainMol'                        | Ueq          | as Compared to Neighbors of |         | C50    | Check |
| PLAT260_ALERT_2_C | Large                                        | Average Ueq of Residue Including | Pb1          |                             | 0.127   | Check  |       |
| PLAT260_ALERT_2_C | Large                                        | Average Ueq of Residue Including | C11          |                             | 0.129   | Check  |       |
| PLAT342_ALERT_3_C | Low                                          | Bond Precision on C-C Bonds      | .....        |                             | 0.01767 | Ang.   |       |
| PLAT360_ALERT_2_C | Short                                        | C(sp3)-C(sp3) Bond               | C4 - C5      | .                           | 1.43    | Ang.   |       |
| PLAT360_ALERT_2_C | Short                                        | C(sp3)-C(sp3) Bond               | C22 - C23    | .                           | 1.43    | Ang.   |       |
| PLAT410_ALERT_2_C | Short                                        | Intra H...H Contact              | H4A ..H5B    | .                           | 1.95    | Ang.   |       |
|                   |                                              |                                  | x,y,z =      | 1_555                       | Check   |        |       |
| PLAT413_ALERT_2_C | Short                                        | Inter XH3 .. XHn                 | H35A ..H49   | .                           | 2.11    | Ang.   |       |
|                   |                                              |                                  | -x,1-y,1-z = | 5_566                       | Check   |        |       |
| PLAT905_ALERT_3_C | Negative K value in the Analysis of Variance | ...                              |              |                             | -2.471  | Report |       |
| PLAT911_ALERT_3_C | Missing FCF Refl Between Thmin & STh/L=      | 0.588                            |              |                             | 45      | Report |       |
|                   | -1                                           | 3                                | 0,           | 0                           | 4       | 0,     |       |
|                   |                                              | 1                                | 3            | 1,                          | 0       | 4      |       |
|                   |                                              | -3                               | 4            | 2,                          | 1       | 4      |       |
|                   |                                              | -2                               | 10           | 2,                          | 9       | 10     |       |
|                   |                                              |                                  | 2            | 12                          | 3,      | 2      |       |
|                   |                                              |                                  | 2            | 12                          | 4,      | -1     |       |
|                   |                                              |                                  | 14           | 27                          | 10,     | -17    |       |
|                   |                                              |                                  | -17          | 22                          | 14,     | -16    |       |
| PLAT971_ALERT_2_C | Check Calcd Resid. Dens.                     | 0.77Ang From Pb1                 |              |                             | 2.09    | eA-3   |       |

**Author Response:** These alerts are generated because of residual density peaks near the heaviest atoms in the structure, due to fourier termination ripples. After inspection, the residual electron density peak does not make chemical sense and will not affect the correct identification of the structure.

|                   |                          |                  |      |      |
|-------------------|--------------------------|------------------|------|------|
| PLAT971_ALERT_2_C | Check Calcd Resid. Dens. | 0.93Ang From Pb2 | 2.05 | eA-3 |
|-------------------|--------------------------|------------------|------|------|

**Author Response:** These alerts are generated because of residual density peaks near the heaviest atoms in the structure, due to fourier termination ripples. After inspection, the residual electron density peak does not make chemical sense and will not affect the correct identification of the structure.

|                   |                          |                  |      |      |
|-------------------|--------------------------|------------------|------|------|
| PLAT971_ALERT_2_C | Check Calcd Resid. Dens. | 1.09Ang From Pb2 | 1.95 | eA-3 |
|-------------------|--------------------------|------------------|------|------|

**Author Response:** These alerts are generated because of residual density peaks near the heaviest atoms in the structure, due to fourier termination ripples. After inspection, the residual electron density peak does not make chemical sense and will not affect the correct identification of the structure.

PLAT971\_ALERT\_2\_C Check Calcd Resid. Dens. 1.09Ang From Pb3 1.94 eA-3

**Author Response:** These alerts are generated because of residual density peaks near the heaviest atoms in the structure, due to fourier termination ripples. After inspection, the residual electron density peak does not make chemical sense and will not affect the correct identification of the structure.

PLAT971\_ALERT\_2\_C Check Calcd Resid. Dens. 0.88Ang From Pb2 1.81 eA-3

**Author Response:** These alerts are generated because of residual density peaks near the heaviest atoms in the structure, due to fourier termination ripples. After inspection, the residual electron density peak does not make chemical sense and will not affect the correct identification of the structure.

PLAT971\_ALERT\_2\_C Check Calcd Resid. Dens. 0.92Ang From Pb2 1.74 eA-3

**Author Response:** These alerts are generated because of residual density peaks near the heaviest atoms in the structure, due to fourier termination ripples. After inspection, the residual electron density peak does not make chemical sense and will not affect the correct identification of the structure.

PLAT971\_ALERT\_2\_C Check Calcd Resid. Dens. 0.88Ang From Pb2 1.73 eA-3

**Author Response:** These alerts are generated because of residual density peaks near the heaviest atoms in the structure, due to fourier termination ripples. After inspection, the residual electron density peak does not make chemical sense and will not affect the correct identification of the structure.

PLAT975\_ALERT\_2\_C Check Calcd Resid. Dens. 0.75Ang From O7 . 0.95 eA-3  
 PLAT977\_ALERT\_2\_C Check Negative Difference Density on H6A . -0.32 eA-3  
 PLAT977\_ALERT\_2\_C Check Negative Difference Density on H25C . -0.34 eA-3  
 PLAT977\_ALERT\_2\_C Check Negative Difference Density on H44A . -0.40 eA-3

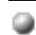

#### Alert level G

ABSMU01\_ALERT\_1\_G Calculation of \_exptl\_absorpt\_correction\_mu  
 not performed for this radiation type.  
 PLAT002\_ALERT\_2\_G Number of Distance or Angle Restraints on AtSite 26 Note  
 PLAT003\_ALERT\_2\_G Number of Uiso or U(i,j) Restrained non-H Atoms 66 Report  
 PLAT007\_ALERT\_5\_G Number of Unrefined Donor-H Atoms ..... 2 Report  
 H10 H23  
 PLAT051\_ALERT\_1\_G Mu(calc) and Mu(CIF) Ratio Differs from 1.0 by . 2.73 %

|                   |                                                  |                 |        |        |
|-------------------|--------------------------------------------------|-----------------|--------|--------|
| PLAT072_ALERT_2_G | SHELXL First Parameter in WGHT                   | Unusually Large | 0.17   | Report |
| PLAT083_ALERT_2_G | SHELXL Second Parameter in WGHT                  | Unusually Large | 8.65   | Why ?  |
| PLAT172_ALERT_4_G | The CIF-Embedded .res File Contains DFIX Records |                 | 23     | Report |
| PLAT177_ALERT_4_G | The CIF-Embedded .res File Contains DELU Records |                 | 4      | Report |
| PLAT178_ALERT_4_G | The CIF-Embedded .res File Contains SIMU Records |                 | 4      | Report |
| PLAT186_ALERT_4_G | The CIF-Embedded .res File Contains ISOR Records |                 | 1      | Report |
| PLAT188_ALERT_3_G | A Non-default SIMU Restraint Value has been used |                 | 0.0100 | Report |
| PLAT188_ALERT_3_G | A Non-default SIMU Restraint Value has been used |                 | 0.0100 | Report |
| PLAT188_ALERT_3_G | A Non-default SIMU Restraint Value has been used |                 | 0.0100 | Report |
| PLAT188_ALERT_3_G | A Non-default SIMU Restraint Value has been used |                 | 0.0100 | Report |
| PLAT192_ALERT_3_G | A Non-default DELU Restraint Value for SecondPar |                 | 0.0200 | Report |
| PLAT192_ALERT_3_G | A Non-default DELU Restraint Value for SecondPar |                 | 0.0200 | Report |
| PLAT192_ALERT_3_G | A Non-default DELU Restraint Value for SecondPar |                 | 0.0200 | Report |
| PLAT192_ALERT_3_G | A Non-default DELU Restraint Value for SecondPar |                 | 0.0200 | Report |
| PLAT299_ALERT_4_G | Atom Site Occupancy Constrained at .....         |                 | 0.5    | Check  |
|                   | C9 C10 C24 C25 C38 C39 H8A H8B                   |                 |        |        |
|                   | H9A H9B H9C H10A H10B H10C H22 H22A              |                 |        |        |
|                   | H24A H24B H24C H25A H25B H25C H37A H37B          |                 |        |        |
|                   | H37C H37D H38A H38B H38C H39A H39B H39C          |                 |        |        |
|                   | C11 C59 C60 C61 C62 C87 H11 H59                  |                 |        |        |
|                   | H60 H61 H62 H87                                  |                 |        |        |
| PLAT301_ALERT_3_G | Main Residue Disorder .....                      | (Resd 1)        | 3%     | Note   |
| PLAT302_ALERT_4_G | Anion/Solvent/Minor-Residue Disorder (Resd 2)    |                 | 100%   | Note   |
| PLAT343_ALERT_2_G | Unusual sp3 Angle Range in Main Residue for      |                 | C4     | Check  |
| PLAT343_ALERT_2_G | Unusual sp3 Angle Range in Main Residue for      |                 | C56    | Check  |
| PLAT412_ALERT_2_G | Short Intra XH3 .. XHn H5A ..H10A .              |                 | 1.79   | Ang.   |
|                   |                                                  | x,y,z =         | 1_555  | Check  |
| PLAT412_ALERT_2_G | Short Intra XH3 .. XHn H22A ..H23C .             |                 | 2.09   | Ang.   |
|                   |                                                  | x,y,z =         | 1_555  | Check  |
| PLAT413_ALERT_2_G | Short Inter XH3 .. XHn H38C ..H55A .             |                 | 1.66   | Ang.   |
|                   |                                                  | 1/2-y,1+x,z =   | 3_565  | Check  |
| PLAT606_ALERT_4_G | Solvent Accessible VOID(S) in Structure .....    |                 |        | ! Info |
| PLAT779_ALERT_4_G | Suspect or Irrelevant (Bond) Angle(s) in CIF ... |                 | 0.00   | Deg.   |
|                   | 07 -07 -PB1 3_555 1_555 1_555 .....              | #               | 190    | Check  |
| PLAT779_ALERT_4_G | Suspect or Irrelevant (Bond) Angle(s) in CIF ... |                 | 0.00   | Deg.   |
|                   | 07 -07 -PB1 2_555 1_555 1_555 .....              | #               | 191    | Check  |
| PLAT779_ALERT_4_G | Suspect or Irrelevant (Bond) Angle(s) in CIF ... |                 | 0.00   | Deg.   |
|                   | 07 -07 -PB1 4_555 1_555 1_555 .....              | #               | 192    | Check  |
| PLAT779_ALERT_4_G | Suspect or Irrelevant (Bond) Angle(s) in CIF ... |                 | 0.00   | Deg.   |
|                   | 07 -07 -AL1 3_555 1_555 3_555 .....              | #               | 193    | Check  |
| PLAT779_ALERT_4_G | Suspect or Irrelevant (Bond) Angle(s) in CIF ... |                 | 0.00   | Deg.   |
|                   | 07 -07 -AL1 3_555 1_555 1_555 .....              | #               | 194    | Check  |
| PLAT779_ALERT_4_G | Suspect or Irrelevant (Bond) Angle(s) in CIF ... |                 | 0.00   | Deg.   |
|                   | 07 -07 -AL1 2_555 1_555 2_555 .....              | #               | 195    | Check  |
| PLAT779_ALERT_4_G | Suspect or Irrelevant (Bond) Angle(s) in CIF ... |                 | 0.00   | Deg.   |
|                   | 07 -07 -AL1 2_555 1_555 3_555 .....              | #               | 196    | Check  |
| PLAT779_ALERT_4_G | Suspect or Irrelevant (Bond) Angle(s) in CIF ... |                 | 0.00   | Deg.   |
|                   | 07 -07 -AL1 4_555 1_555 3_555 .....              | #               | 197    | Check  |
| PLAT779_ALERT_4_G | Suspect or Irrelevant (Bond) Angle(s) in CIF ... |                 | 0.00   | Deg.   |
|                   | 07 -07 -AL1 4_555 1_555 2_555 .....              | #               | 198    | Check  |
| PLAT779_ALERT_4_G | Suspect or Irrelevant (Bond) Angle(s) in CIF ... |                 | 0.00   | Deg.   |
|                   | 07 -07 -AL1 4_555 1_555 1_555 .....              | #               | 199    | Check  |
| PLAT779_ALERT_4_G | Suspect or Irrelevant (Bond) Angle(s) in CIF ... |                 | 0.00   | Deg.   |
|                   | 07 -07 -AL1 4_555 1_555 4_555 .....              | #               | 200    | Check  |
| PLAT779_ALERT_4_G | Suspect or Irrelevant (Bond) Angle(s) in CIF ... |                 | 0.00   | Deg.   |
|                   | 07 -07 -AL1 2_555 1_555 1_555 .....              | #               | 201    | Check  |
| PLAT779_ALERT_4_G | Suspect or Irrelevant (Bond) Angle(s) in CIF ... |                 | 0.00   | Deg.   |

|                                                                              |     |      |       |       |       |       |         |       |       |
|------------------------------------------------------------------------------|-----|------|-------|-------|-------|-------|---------|-------|-------|
| 07                                                                           | -07 | -AL1 | 3_555 | 1_555 | 4_555 | ..... | #       | 202   | Check |
| PLAT779_ALERT_4_G Suspect or Irrelevant (Bond) Angle(s) in CIF ... 0.00 Deg. |     |      |       |       |       |       |         |       |       |
| 07                                                                           | -07 | -AL1 | 2_555 | 1_555 | 4_555 | ..... | #       | 203   | Check |
| PLAT779_ALERT_4_G Suspect or Irrelevant (Bond) Angle(s) in CIF ... 0.00 Deg. |     |      |       |       |       |       |         |       |       |
| 07                                                                           | -07 | -AL1 | 3_555 | 1_555 | 2_555 | ..... | #       | 204   | Check |
| PLAT779_ALERT_4_G Suspect or Irrelevant (Bond) Angle(s) in CIF ... 0.00 Deg. |     |      |       |       |       |       |         |       |       |
| 07                                                                           | -07 | -07  | 3_555 | 1_555 | 2_555 | ..... | #       | 205   | Check |
| PLAT779_ALERT_4_G Suspect or Irrelevant (Bond) Angle(s) in CIF ... 0.00 Deg. |     |      |       |       |       |       |         |       |       |
| 07                                                                           | -07 | -07  | 4_555 | 1_555 | 3_555 | ..... | #       | 206   | Check |
| PLAT779_ALERT_4_G Suspect or Irrelevant (Bond) Angle(s) in CIF ... 0.00 Deg. |     |      |       |       |       |       |         |       |       |
| 07                                                                           | -07 | -07  | 4_555 | 1_555 | 2_555 | ..... | #       | 207   | Check |
| PLAT790_ALERT_4_G Centre of Gravity not Within Unit Cell: Resd. # 2 Note     |     |      |       |       |       |       |         |       |       |
| C6 H6                                                                        |     |      |       |       |       |       |         |       |       |
| PLAT794_ALERT_5_G Tentative Bond Valency for Pb1 (II) .                      |     |      |       |       |       |       | 2.06    | Info  |       |
| PLAT794_ALERT_5_G Tentative Bond Valency for Pb3 (II) .                      |     |      |       |       |       |       | 2.06    | Info  |       |
| PLAT794_ALERT_5_G Tentative Bond Valency for Al1 (III) .                     |     |      |       |       |       |       | 2.76    | Info  |       |
| PLAT794_ALERT_5_G Tentative Bond Valency for Al2 (III) .                     |     |      |       |       |       |       | 2.75    | Info  |       |
| PLAT794_ALERT_5_G Tentative Bond Valency for Al6 (III) .                     |     |      |       |       |       |       | 2.82    | Info  |       |
| PLAT794_ALERT_5_G Tentative Bond Valency for Al7 (III) .                     |     |      |       |       |       |       | 2.83    | Info  |       |
| PLAT794_ALERT_5_G Tentative Bond Valency for Al8 (III) .                     |     |      |       |       |       |       | 2.73    | Info  |       |
| PLAT860_ALERT_3_G Number of Least-Squares Restraints .....                   |     |      |       |       |       |       | 581     | Note  |       |
| PLAT868_ALERT_4_G ALERTS Due to the Use of _smtbx_masks Suppressed           |     |      |       |       |       |       | !       | Info  |       |
| PLAT883_ALERT_1_G No Info/Value for _atom_sites_solution_primary .           |     |      |       |       |       |       | Please  | Do !  |       |
| PLAT909_ALERT_3_G Percentage of I>2sig(I) Data at Theta(Max) Still           |     |      |       |       |       |       | 34%     | Note  |       |
| PLAT910_ALERT_3_G Missing # of FCF Reflection(s) Below Theta(Min).           |     |      |       |       |       |       | 2       | Note  |       |
| 1 1 0, 0 0 1,                                                                |     |      |       |       |       |       |         |       |       |
| PLAT933_ALERT_2_G Number of HKL-OMIT Records in Embedded .res File           |     |      |       |       |       |       | 33      | Note  |       |
| 1 3 1, -2 10 2, 0 8 0, -1 7 2, 2 6 0, 2 14 3,                                |     |      |       |       |       |       |         |       |       |
| -1 3 5, -1 3 6, 2 12 3, -10 13 1, -1 4 3, 1 4 2,                             |     |      |       |       |       |       |         |       |       |
| 0 4 0, 4 7 2, -2 5 3, -3 6 2, -1 8 6, -3 9 1,                                |     |      |       |       |       |       |         |       |       |
| 1 8 2, 0 4 1, 2 12 4, -5 11 2, -3 4 2, 2 10 0,                               |     |      |       |       |       |       |         |       |       |
| -4 5 8, 7 7 1, -2 4 6, 2 5 4, 5 7 4, 6 8 4,                                  |     |      |       |       |       |       |         |       |       |
| 1 3 4, 2 2 3, 9 10 2,                                                        |     |      |       |       |       |       |         |       |       |
| PLAT941_ALERT_3_G Average HKL Measurement Multiplicity .....                 |     |      |       |       |       |       | 3.4     | Low   |       |
| PLAT951_ALERT_5_G Calculated (ThMax) and CIF-Reported Kmax Differ            |     |      |       |       |       |       | 2       | Units |       |
| PLAT969_ALERT_5_G The 'Henn et al.' R-Factor-gap value .....                 |     |      |       |       |       |       | 4.615   | Note  |       |
| Predicted wR2: Based on SigI**2 5.25 or SHELX Weight 23.58                   |     |      |       |       |       |       |         |       |       |
| PLAT978_ALERT_2_G Number C-C Bonds with Positive Residual Density.           |     |      |       |       |       |       | 0       | Info  |       |
| PLAT984_ALERT_1_G The C-f' = 0.0147 Deviates from the B&C-Value              |     |      |       |       |       |       | 0.0137  | Check |       |
| PLAT984_ALERT_1_G The N-f' = 0.0253 Deviates from the B&C-Value              |     |      |       |       |       |       | 0.0241  | Check |       |
| PLAT984_ALERT_1_G The O-f' = 0.0412 Deviates from the B&C-Value              |     |      |       |       |       |       | 0.0389  | Check |       |
| PLAT984_ALERT_1_G The Pb-f' = -4.2646 Deviates from the B&C-Value            |     |      |       |       |       |       | -4.4950 | Check |       |
| PLAT985_ALERT_1_G The Al-f" = 0.1843 Deviates from the B&C-Value             |     |      |       |       |       |       | 0.1873  | Check |       |
| PLAT985_ALERT_1_G The Pb-f" = 7.1982 Deviates from the B&C-Value             |     |      |       |       |       |       | 6.8412  | Check |       |
| PLAT985_ALERT_1_G The S-f" = 0.4242 Deviates from the B&C-Value              |     |      |       |       |       |       | 0.4295  | Check |       |

- 
- 7 **ALERT level A** = Most likely a serious problem - resolve or explain  
3 **ALERT level B** = A potentially serious problem, consider carefully  
38 **ALERT level C** = Check. Ensure it is not caused by an omission or oversight  
71 **ALERT level G** = General information/check it is not something unexpected
- 11 ALERT type 1 CIF construction/syntax error, inconsistent or missing data  
53 ALERT type 2 Indicator that the structure model may be wrong or deficient  
18 ALERT type 3 Indicator that the structure quality may be low  
27 ALERT type 4 Improvement, methodology, query or suggestion  
10 ALERT type 5 Informative message, check

---

## checkCIF publication errors

---

### Alert level A

PUBL004\_ALERT\_1\_A The contact author's name and address are missing,  
\_publ\_contact\_author\_name and \_publ\_contact\_author\_address.  
PUBL005\_ALERT\_1\_A \_publ\_contact\_author\_email, \_publ\_contact\_author\_fax and  
\_publ\_contact\_author\_phone are all missing.  
At least one of these should be present.  
PUBL006\_ALERT\_1\_A \_publ\_requested\_journal is missing  
e.g. 'Acta Crystallographica Section C'  
PUBL008\_ALERT\_1\_A \_publ\_section\_title is missing. Title of paper.  
PUBL009\_ALERT\_1\_A \_publ\_author\_name is missing. List of author(s) name(s).  
PUBL010\_ALERT\_1\_A \_publ\_author\_address is missing. Author(s) address(es).  
PUBL012\_ALERT\_1\_A \_publ\_section\_abstract is missing.  
Abstract of paper in English.

---

7 **ALERT level A** = Data missing that is essential or data in wrong format  
0 **ALERT level G** = General alerts. Data that may be required is missing

---

### Publication of your CIF

You should attempt to resolve as many as possible of the alerts in all categories. Often the minor alerts point to easily fixed oversights, errors and omissions in your CIF or refinement strategy, so attention to these fine details can be worthwhile. In order to resolve some of the more serious problems it may be necessary to carry out additional measurements or structure refinements. However, the nature of your study may justify the reported deviations from journal submission requirements and the more serious of these should be commented upon in the discussion or experimental section of a paper or in the "special\_details" fields of the CIF. *checkCIF* was carefully designed to identify outliers and unusual parameters, but every test has its limitations and alerts that are not important in a particular case may appear. Conversely, the absence of alerts does not guarantee there are no aspects of the results needing attention. It is up to the individual to critically assess their own results and, if necessary, seek expert advice.

If level A alerts remain, which you believe to be justified deviations, and you intend to submit this CIF for publication in a journal, you should additionally insert an explanation in your CIF using the Validation Reply Form (VRF) below. This will allow your explanation to be considered as part of the review process.

### Validation response form

Please find below a validation response form (VRF) that can be filled in and pasted into your CIF.

```
# start Validation Reply Form
_vrf_PUBL004_GLOBAL
;
PROBLEM: The contact author's name and address are missing,
```



```

RESPONSE: ...
;
_vrf_PUBL005_GLOBAL
;
PROBLEM: _publ_contact_author_email, _publ_contact_author_fax and
RESPONSE: ...
;
_vrf_PUBL006_GLOBAL
;
PROBLEM: _publ_requested_journal is missing
RESPONSE: ...
;
_vrf_PUBL008_GLOBAL
;
PROBLEM: _publ_section_title is missing. Title of paper.
RESPONSE: ...
;
_vrf_PUBL009_GLOBAL
;
PROBLEM: _publ_author_name is missing. List of author(s) name(s).
RESPONSE: ...
;
_vrf_PUBL010_GLOBAL
;
PROBLEM: _publ_author_address is missing. Author(s) address(es).
RESPONSE: ...
;
_vrf_PUBL012_GLOBAL
;
PROBLEM: _publ_section_abstract is missing.
RESPONSE: ...
;
# end Validation Reply Form

```

If you wish to submit your CIF for publication in Acta Crystallographica Section C or E, you should upload your CIF via the web. If you wish to submit your CIF for publication in IUCrData you should upload your CIF via the web. If your CIF is to form part of a submission to another IUCr journal, you will be asked, either during electronic submission or by the Co-editor handling your paper, to upload your CIF via our web site.

---

**PLATON version of 15/07/2024; check.def file version of 15/07/2024**

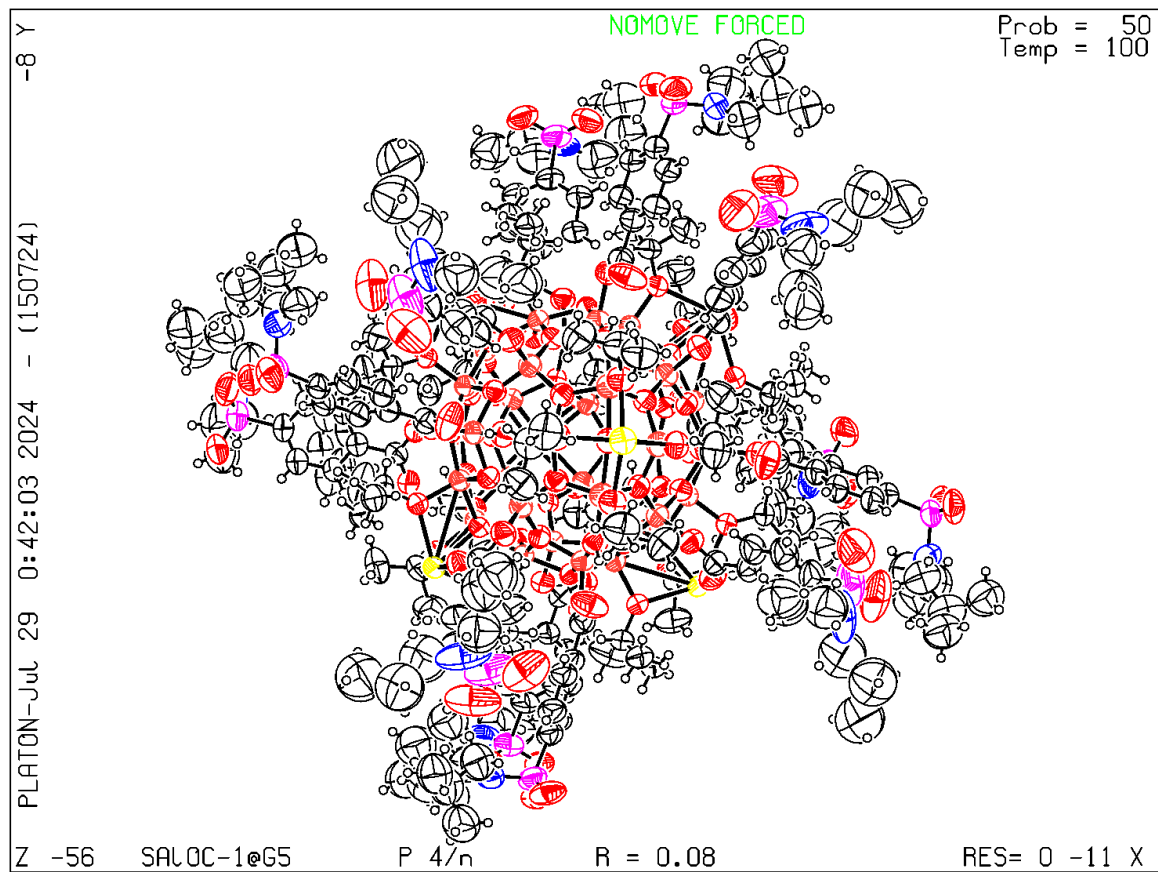

Supplement: Supplementary file 3 [file 1d2275e304d85cc8925b0a41.pdf]
