# Supplementary material for: Precise Nanochemistry of Spherical Aluminum Oxo Clusters for Accurate Surface Guest Recognition and Release
Source: Research Square preprint supplement (doi:10.21203/rs.3.rs-4948547/v1), 2024-11-06

## checkCIF/PLATON report

Structure factors have been supplied for datablock(s) SAIOC-1@G6

THIS REPORT IS FOR GUIDANCE ONLY. IF USED AS PART OF A REVIEW PROCEDURE FOR PUBLICATION, IT SHOULD NOT REPLACE THE EXPERTISE OF AN EXPERIENCED CRYSTALLOGRAPHIC REFEREE.

No syntax errors found.      CIF dictionary      Interpreting this report

### Datablock: SAIOC-1@G6

---

Bond precision:      C-C = 0.0155 Å      Wavelength=1.34050

Cell:                      a=30.0301 (3)      b=30.0301 (3)      c=19.2959 (4)  
                                    alpha=90      beta=90      gamma=90

Temperature:              100 K

|                        | Calculated                                                | Reported                                      |
|------------------------|-----------------------------------------------------------|-----------------------------------------------|
| Volume                 | 17401.2 (5)                                               | 17401.2 (5)                                   |
| Space group            | P 4/n                                                     | P 4/n                                         |
| Hall group             | -P 4a                                                     | -P 4a                                         |
| Moiety formula         | C216 H358 Al32 N12 O110 Pb6<br>S12, 3(C9 H12) [+ solvent] | C216 H358 Al32 N12 O110 Pb6<br>S12, 3(C9 H12) |
| Sum formula            | C243 H394 Al32 N12 O110 Pb6<br>S12 [+ solvent]            | C243 H394 Al32 N12 O110 Pb6<br>S12            |
| Mr                     | 7735.00                                                   | 7734.90                                       |
| Dx, g cm <sup>-3</sup> | 1.476                                                     | 1.476                                         |
| Z                      | 2                                                         | 2                                             |
| Mu (mm <sup>-1</sup> ) | 5.104                                                     | 5.248                                         |
| F000                   | 7832.0                                                    | 7832.0                                        |
| F000'                  | 7811.32                                                   |                                               |
| h, k, lmax             | 35, 35, 22                                                | 34, 35, 22                                    |
| Nref                   | 14850                                                     | 14796                                         |
| Tmin, Tmax             |                                                           | 1.000, 1.000                                  |
| Tmin'                  |                                                           |                                               |

Correction method= # Reported T Limits: Tmin=1.000 Tmax=1.000  
AbsCorr = SPHERE

Data completeness= 0.996

Theta (max)= 52.047

R(reflections) = 0.0635 ( 10743)

wR2(reflections) =  
0.2018 ( 14796)

S = 1.046

Npar = 934

---

The following ALERTS were generated. Each ALERT has the format  
**test-name\_ALERT\_alert-type\_alert-level.**  
Click on the hyperlinks for more details of the test.

---

#### Alert level A

PLAT973\_ALERT\_2\_A Check Calcd Positive Resid. Density on Pb1 2.01 eA-3

**Author Response:** These alerts are generated because of residual density peaks near the heaviest atoms in the structure, due to fourier termination ripples. After inspection, the residual electron density peak does not make chemical sense and will not affect the correct identification of the structure.

---

#### Alert level B

PLAT220\_ALERT\_2\_B NonSolvent Resd 1 C Ueq(max)/Ueq(min) Range 6.2 Ratio

**Author Response:** These alerts are generated because of a slight unresolved disorder caused by free rotation of the flexible chain at the end of the ligand. Some refi commands such as DELU, SIMU and ISOR were used to address such abnormal Ueq value, but failed. After inspection, this does not affect the correct assign of atom types.

---

PLAT241\_ALERT\_2\_B High 'MainMol' Ueq as Compared to Neighbors of C3 Check

**Author Response:** These alerts are generated because of a slight unresolved disorder caused by free rotation of the flexible chain at the end of the ligand. Some refi commands such as DELU, SIMU and ISOR were used to address such abnormal Ueq value, but failed. After inspection, this does not affect the correct assign of atom types.

---

PLAT973\_ALERT\_2\_B Check Calcd Positive Resid. Density on Pb2 1.96 eA-3

**Author Response:** These alerts are generated because of residual density peaks near the heaviest atoms in the structure, due to fourier termination ripples. After inspection, the residual electron density peak does not make chemical sense and will not affect the correct identification of the structure.

---

**Alert level C**

RADNW01\_ALERT\_1\_C The radiation wavelength lies outside the expected range  
for the supplied radiation type. Expected range 1.34130-1.34150  
Wavelength given = 1.34050

THETM01\_ALERT\_3\_C The value of sine(theta\_max)/wavelength is less than 0.590  
Calculated sin(theta\_max)/wavelength = 0.5882

PLAT094\_ALERT\_2\_C Ratio of Maximum / Minimum Residual Density .... 2.82 Report

PLAT213\_ALERT\_2\_C Atom O1 has ADP max/min Ratio ..... 3.3 prolat

PLAT220\_ALERT\_2\_C NonSolvent Resd 1 O Ueq(max)/Ueq(min) Range 4.9 Ratio

**Author Response: These alerts are generated because of a slight unresolved disorder caused by free rotation of the flexible chain at the end of the ligand. Some refi commands such as DELU, SIMU and ISOR were used to address such abnormal Ueq value, but failed. After inspection, this does not affect the correct assign of atom types.**

PLAT222\_ALERT\_3\_C NonSolvent Resd 1 H Uiso(max)/Uiso(min) Range 8.6 Ratio

PLAT241\_ALERT\_2\_C High 'MainMol' Ueq as Compared to Neighbors of C8 Check

**Author Response: These alerts are generated because of a slight unresolved disorder caused by free rotation of the flexible chain at the end of the ligand. Some refi commands such as DELU, SIMU and ISOR were used to address such abnormal Ueq value, but failed. After inspection, this does not affect the correct assign of atom types.**

PLAT241\_ALERT\_2\_C High 'MainMol' Ueq as Compared to Neighbors of C43 Check

**Author Response: These alerts are generated because of a slight unresolved disorder caused by free rotation of the flexible chain at the end of the ligand. Some refi commands such as DELU, SIMU and ISOR were used to address such abnormal Ueq value, but failed. After inspection, this does not affect the correct assign of atom types.**

PLAT241\_ALERT\_2\_C High 'MainMol' Ueq as Compared to Neighbors of C45 Check

**Author Response: These alerts are generated because of a slight unresolved disorder caused by free rotation of the flexible chain at the end of the ligand. Some refi commands such as DELU, SIMU and ISOR were used to address such abnormal Ueq value, but failed. After inspection, this does not affect the correct assign of atom types.**

PLAT241\_ALERT\_2\_C High 'MainMol' Ueq as Compared to Neighbors of C50 Check

**Author Response: These alerts are generated because of a slight unresolved disorder caused by free rotation of the flexible chain at the end of the ligand. Some refi commands such as DELU, SIMU and ISOR were used to address such abnormal Ueq value, but failed. After inspection, this does not affect the correct assign of atom types.**

PLAT241\_ALERT\_2\_C High 'MainMol' Ueq as Compared to Neighbors of C51 Check

**Author Response: These alerts are generated because of a slight unresolved disorder caused by free rotation of the flexible chain at the end of the ligand. Some refi commands such as DELU, SIMU and ISOR were used to address such abnormal Ueq value, but failed. After inspection, this does not affect the correct assign of atom types.**

PLAT241\_ALERT\_2\_C High 'MainMol' Ueq as Compared to Neighbors of C55 Check

**Author Response: These alerts are generated because of a slight unresolved disorder caused by free rotation of the flexible chain at the end of the ligand. Some refi commands such as DELU, SIMU and ISOR were used to address such abnormal Ueq value, but failed. After inspection, this does not affect the correct assign of atom types.**

|                   |                                       |                                                |                                 |         |        |       |
|-------------------|---------------------------------------|------------------------------------------------|---------------------------------|---------|--------|-------|
| PLAT242_ALERT_2_C | Low                                   | 'MainMol'                                      | Ueq as Compared to Neighbors of | S1      | Check  |       |
| PLAT242_ALERT_2_C | Low                                   | 'MainMol'                                      | Ueq as Compared to Neighbors of | S3      | Check  |       |
| PLAT242_ALERT_2_C | Low                                   | 'MainMol'                                      | Ueq as Compared to Neighbors of | O28     | Check  |       |
| PLAT242_ALERT_2_C | Low                                   | 'MainMol'                                      | Ueq as Compared to Neighbors of | N1      | Check  |       |
| PLAT242_ALERT_2_C | Low                                   | 'MainMol'                                      | Ueq as Compared to Neighbors of | N3      | Check  |       |
| PLAT242_ALERT_2_C | Low                                   | 'MainMol'                                      | Ueq as Compared to Neighbors of | C5      | Check  |       |
| PLAT242_ALERT_2_C | Low                                   | 'MainMol'                                      | Ueq as Compared to Neighbors of | C7      | Check  |       |
| PLAT242_ALERT_2_C | Low                                   | 'MainMol'                                      | Ueq as Compared to Neighbors of | C19     | Check  |       |
| PLAT242_ALERT_2_C | Low                                   | 'MainMol'                                      | Ueq as Compared to Neighbors of | C22     | Check  |       |
| PLAT242_ALERT_2_C | Low                                   | 'MainMol'                                      | Ueq as Compared to Neighbors of | C25     | Check  |       |
| PLAT242_ALERT_2_C | Low                                   | 'MainMol'                                      | Ueq as Compared to Neighbors of | C44     | Check  |       |
| PLAT250_ALERT_2_C | Large                                 | U3/U1 Ratio for <U(i, j)> Tensor(Resd          | 2)                              | 2.2     | Note   |       |
| PLAT260_ALERT_2_C | Large                                 | Average Ueq of Residue Including               | Pb1                             | 0.117   | Check  |       |
| PLAT260_ALERT_2_C | Large                                 | Average Ueq of Residue Including               | C57                             | 0.229   | Check  |       |
| PLAT329_ALERT_4_C | Carbon Atom Hybridisation Unclear for |                                                |                                 |         | C49    | Check |
| PLAT342_ALERT_3_C | Low                                   | Bond Precision on C-C Bonds                    | .....                           | 0.01545 | Ang.   |       |
| PLAT361_ALERT_2_C | Long                                  | C(sp3)-C(sp3) Bond                             | C55 - C56                       | 1.69    | Ang.   |       |
| PLAT410_ALERT_2_C | Short                                 | Intra H...H Contact                            | H2A ..H3B                       | 1.93    | Ang.   |       |
|                   |                                       |                                                | x, y, z =                       | 1_555   | Check  |       |
| PLAT413_ALERT_2_C | Short                                 | Inter XH3 .. XHn                               | H6B ..H53A                      | 2.01    | Ang.   |       |
|                   |                                       |                                                | 1-x, 2-y, 1-z =                 | 5_676   | Check  |       |
| PLAT911_ALERT_3_C | Missing                               | FCF Refl Between Thmin & STh/L=                | 0.588                           | 52      | Report |       |
|                   | 1                                     | 3 0, 4 4 0, -1 7 0, -3 4 1, -2 4 1, 4 4 1,     |                                 |         |        |       |
|                   | 1                                     | 5 1, 2 5 1, 3 5 1, 5 5 1, 2 7 1, 3 7 1,        |                                 |         |        |       |
|                   | 6                                     | 8 1, 0 9 1, 3 9 1, 0 0 2, 0 1 2, -1 2 2,       |                                 |         |        |       |
|                   | -1                                    | 5 2, 2 5 2, -2 7 2, 7 7 2, -4 11 2, 1 1 3,     |                                 |         |        |       |
|                   | 1                                     | 4 3, 2 4 3, 1 7 3, 3 8 3, 1 11 3, 5 8 4,       |                                 |         |        |       |
|                   | 7                                     | 10 5, 4 11 5, -2 13 5, 15 28 5, -1 3 6, 4 4 6, |                                 |         |        |       |
|                   | -4                                    | 7 6, 1 8 6, 5 9 6, 2 10 6, 5 13 6, -1 8 7,     |                                 |         |        |       |

2 5 8, -14 22 14, -13 22 14, -12 22 14, -14 23 14, -14 22 15,  
-13 22 15, 3 19 18, 3 20 18, 4 20 18,

|                   |                                          |                  |              |
|-------------------|------------------------------------------|------------------|--------------|
| PLAT971_ALERT_2_C | Check Calcd Resid. Dens.                 | 0.85Ang From Pb2 | 2.23 eA-3    |
| PLAT971_ALERT_2_C | Check Calcd Resid. Dens.                 | 0.96Ang From Pb2 | 1.95 eA-3    |
| PLAT971_ALERT_2_C | Check Calcd Resid. Dens.                 | 0.98Ang From Pb1 | 1.76 eA-3    |
| PLAT971_ALERT_2_C | Check Calcd Resid. Dens.                 | 0.64Ang From Pb1 | 1.66 eA-3    |
| PLAT971_ALERT_2_C | Check Calcd Resid. Dens.                 | 0.93Ang From Pb2 | 1.64 eA-3    |
| PLAT971_ALERT_2_C | Check Calcd Resid. Dens.                 | 0.79Ang From Pb3 | 1.61 eA-3    |
| PLAT971_ALERT_2_C | Check Calcd Resid. Dens.                 | 1.16Ang From Pb1 | 1.60 eA-3    |
| PLAT971_ALERT_2_C | Check Calcd Resid. Dens.                 | 0.84Ang From Pb3 | 1.59 eA-3    |
| PLAT975_ALERT_2_C | Check Calcd Resid. Dens.                 | 0.94Ang From O24 | . 0.91 eA-3  |
| PLAT976_ALERT_2_C | Check Calcd Resid. Dens.                 | 1.04Ang From O21 | . -0.49 eA-3 |
| PLAT977_ALERT_2_C | Check Negative Difference Density on H2B | .                | -0.31 eA-3   |

### Alert level G

ABSMU01\_ALERT\_1\_G Calculation of \_exptl\_absorpt\_correction\_mu  
not performed for this radiation type.

|                   |                                                  |                |               |
|-------------------|--------------------------------------------------|----------------|---------------|
| PLAT002_ALERT_2_G | Number of Distance or Angle Restraints on AtSite |                | 30 Note       |
| PLAT003_ALERT_2_G | Number of Uiso or U(i,j) Restrained non-H Atoms  |                | 25 Report     |
| PLAT007_ALERT_5_G | Number of Unrefined Donor-H Atoms .....          |                | 2 Report      |
|                   | H8 H29                                           |                |               |
| PLAT051_ALERT_1_G | Mu(calc) and Mu(CIF) Ratio Differs from 1.0 by . |                | 2.74 %        |
| PLAT069_ALERT_1_G | Atom Label Without Numerical Part .....          |                | A1 Do !       |
| PLAT072_ALERT_2_G | SHELXL First Parameter in WGHT Unusually Large   |                | 0.14 Report   |
| PLAT172_ALERT_4_G | The CIF-Embedded .res File Contains DFIX Records |                | 24 Report     |
| PLAT173_ALERT_4_G | The CIF-Embedded .res File Contains DANG Records |                | 2 Report      |
| PLAT174_ALERT_4_G | The CIF-Embedded .res File Contains FLAT Records |                | 1 Report      |
| PLAT177_ALERT_4_G | The CIF-Embedded .res File Contains DELU Records |                | 2 Report      |
| PLAT178_ALERT_4_G | The CIF-Embedded .res File Contains SIMU Records |                | 2 Report      |
| PLAT186_ALERT_4_G | The CIF-Embedded .res File Contains ISOR Records |                | 1 Report      |
| PLAT187_ALERT_4_G | The CIF-Embedded .res File Contains RIGU Records |                | 1 Report      |
| PLAT188_ALERT_3_G | A Non-default SIMU Restraint Value has been used |                | 0.0100 Report |
| PLAT188_ALERT_3_G | A Non-default SIMU Restraint Value has been used |                | 0.0100 Report |
| PLAT190_ALERT_3_G | A Non-default RIGU Restraint Value for First Par |                | 0.0100 Report |
| PLAT190_ALERT_3_G | A Non-default RIGU Restraint Value for SecondPar |                | 0.0200 Report |
| PLAT192_ALERT_3_G | A Non-default DELU Restraint Value for SecondPar |                | 0.0200 Report |
| PLAT192_ALERT_3_G | A Non-default DELU Restraint Value for SecondPar |                | 0.0200 Report |
| PLAT300_ALERT_4_G | Atom Site Occupancy of C47                       | Constrained at | 0.75 Check    |
| PLAT300_ALERT_4_G | Atom Site Occupancy of C48                       | Constrained at | 0.25 Check    |
| PLAT300_ALERT_4_G | Atom Site Occupancy of H47A                      | Constrained at | 0.75 Check    |
| PLAT300_ALERT_4_G | Atom Site Occupancy of H47B                      | Constrained at | 0.75 Check    |
| PLAT300_ALERT_4_G | Atom Site Occupancy of H47C                      | Constrained at | 0.75 Check    |
| PLAT300_ALERT_4_G | Atom Site Occupancy of H48A                      | Constrained at | 0.25 Check    |
| PLAT300_ALERT_4_G | Atom Site Occupancy of H48B                      | Constrained at | 0.25 Check    |
| PLAT300_ALERT_4_G | Atom Site Occupancy of H48C                      | Constrained at | 0.25 Check    |
| PLAT300_ALERT_4_G | Atom Site Occupancy of H49A                      | Constrained at | 0.25 Check    |
| PLAT300_ALERT_4_G | Atom Site Occupancy of H49B                      | Constrained at | 0.25 Check    |
| PLAT300_ALERT_4_G | Atom Site Occupancy of C57                       | Constrained at | 0.75 Check    |
| PLAT300_ALERT_4_G | Atom Site Occupancy of C58                       | Constrained at | 0.75 Check    |
| PLAT300_ALERT_4_G | Atom Site Occupancy of C59                       | Constrained at | 0.75 Check    |
| PLAT300_ALERT_4_G | Atom Site Occupancy of C60                       | Constrained at | 0.75 Check    |
| PLAT300_ALERT_4_G | Atom Site Occupancy of C61                       | Constrained at | 0.75 Check    |
| PLAT300_ALERT_4_G | Atom Site Occupancy of C62                       | Constrained at | 0.75 Check    |
| PLAT300_ALERT_4_G | Atom Site Occupancy of C63                       | Constrained at | 0.75 Check    |
| PLAT300_ALERT_4_G | Atom Site Occupancy of C64                       | Constrained at | 0.75 Check    |
| PLAT300_ALERT_4_G | Atom Site Occupancy of C65                       | Constrained at | 0.75 Check    |

|                   |                                                  |                   |         |        |
|-------------------|--------------------------------------------------|-------------------|---------|--------|
| PLAT300_ALERT_4_G | Atom Site Occupancy of H57A                      | Constrained at    | 0.75    | Check  |
| PLAT300_ALERT_4_G | Atom Site Occupancy of H57B                      | Constrained at    | 0.75    | Check  |
| PLAT300_ALERT_4_G | Atom Site Occupancy of H57C                      | Constrained at    | 0.75    | Check  |
| PLAT300_ALERT_4_G | Atom Site Occupancy of H58A                      | Constrained at    | 0.75    | Check  |
| PLAT300_ALERT_4_G | Atom Site Occupancy of H58B                      | Constrained at    | 0.75    | Check  |
| PLAT300_ALERT_4_G | Atom Site Occupancy of H58C                      | Constrained at    | 0.75    | Check  |
| PLAT300_ALERT_4_G | Atom Site Occupancy of H59A                      | Constrained at    | 0.75    | Check  |
| PLAT300_ALERT_4_G | Atom Site Occupancy of H59B                      | Constrained at    | 0.75    | Check  |
| PLAT300_ALERT_4_G | Atom Site Occupancy of H59C                      | Constrained at    | 0.75    | Check  |
| PLAT300_ALERT_4_G | Atom Site Occupancy of H60                       | Constrained at    | 0.75    | Check  |
| PLAT300_ALERT_4_G | Atom Site Occupancy of H62                       | Constrained at    | 0.75    | Check  |
| PLAT300_ALERT_4_G | Atom Site Occupancy of H64                       | Constrained at    | 0.75    | Check  |
| PLAT301_ALERT_3_G | Main Residue Disorder .....                      | (Resd 1)          | 1%      | Note   |
| PLAT302_ALERT_4_G | Anion/Solvent/Minor-Residue Disorder             | (Resd 2)          | 100%    | Note   |
| PLAT304_ALERT_4_G | Non-Integer Number of Atoms in .....             | (Resd 2)          | 15.75   | Check  |
| PLAT367_ALERT_2_G | Long? C(sp?)-C(sp?) Bond C49                     | - C50             | 1.54    | Ang.   |
| PLAT411_ALERT_2_G | Short Inter H...H Contact H3A                    | ..H64             | 2.10    | Ang.   |
|                   |                                                  | x,y,l+z =         | 1_556   | Check  |
| PLAT413_ALERT_2_G | Short Inter XH3 .. XHn H3A                       | ..H58B            | 2.00    | Ang.   |
|                   |                                                  | x,y,l+z =         | 1_556   | Check  |
| PLAT413_ALERT_2_G | Short Inter XH3 .. XHn H3B                       | ..H58B            | 1.20    | Ang.   |
|                   |                                                  | x,y,l+z =         | 1_556   | Check  |
| PLAT432_ALERT_2_G | Short Inter X...Y Contact C3                     | ..C58             | 2.84    | Ang.   |
|                   |                                                  | x,y,l+z =         | 1_556   | Check  |
| PLAT605_ALERT_4_G | Largest Solvent Accessible VOID in the Structure |                   | 405     | A**3   |
| PLAT720_ALERT_4_G | Number of Unusual/Non-Standard Labels .....      |                   | 2       | Note   |
|                   | A100 A10B                                        |                   |         |        |
| PLAT721_ALERT_1_G | Bond Calc 0.99000, Rep 0.97990 Dev...            |                   | 0.01    | Ang.   |
|                   | C48 -H48C                                        | 1_555 1_555 ..... | # 247   | Check  |
| PLAT722_ALERT_1_G | Angle Calc 104.00, Rep 105.10 Dev...             |                   | 1.10    | Degree |
|                   | H2A -C2 -H2B                                     | 1_555 1_555       | # 542   | Check  |
| PLAT722_ALERT_1_G | Angle Calc 113.00, Rep 111.80 Dev...             |                   | 1.20    | Degree |
|                   | C49 -C48 -H48B                                   | 1_555 1_555 1_555 | # 544   | Check  |
| PLAT794_ALERT_5_G | Tentative Bond Valency for Pb1                   | (II)              | 2.07    | Info   |
| PLAT794_ALERT_5_G | Tentative Bond Valency for Pb3                   | (II)              | 2.08    | Info   |
| PLAT794_ALERT_5_G | Tentative Bond Valency for Al                    | (III)             | 2.77    | Info   |
| PLAT794_ALERT_5_G | Tentative Bond Valency for Al00                  | (III)             | 2.75    | Info   |
| PLAT794_ALERT_5_G | Tentative Bond Valency for Al2                   | (III)             | 2.75    | Info   |
| PLAT794_ALERT_5_G | Tentative Bond Valency for Al0B                  | (III)             | 2.73    | Info   |
| PLAT794_ALERT_5_G | Tentative Bond Valency for Al4                   | (III)             | 2.81    | Info   |
| PLAT794_ALERT_5_G | Tentative Bond Valency for Al5                   | (III)             | 2.87    | Info   |
| PLAT802_ALERT_4_G | CIF Input Record(s) with more than 80 Characters |                   | 4       | Info   |
| PLAT860_ALERT_3_G | Number of Least-Squares Restraints .....         |                   | 328     | Note   |
| PLAT868_ALERT_4_G | ALERTS Due to the Use of _smtbx_masks Suppressed |                   | !       | Info   |
| PLAT909_ALERT_3_G | Percentage of I>2sig(I) Data at Theta(Max) Still |                   | 41%     | Note   |
| PLAT910_ALERT_3_G | Missing # of FCF Reflection(s) Below Theta(Min). |                   | 2       | Note   |
|                   | 1 1 0, 0 0 1,                                    |                   |         |        |
| PLAT933_ALERT_2_G | Number of HKL-OMIT Records in Embedded .res File |                   | 42      | Note   |
|                   | -1 2 2, 0 0 2, 1 3 0, 0 1 2, 1 5 1,              |                   | -4 7 6, |        |
|                   | 4 11 5, 2 5 2, 5 9 6, -4 11 2, 1 4 3,            |                   | 1 8 6,  |        |
|                   | 6 8 1, 7 7 2, -2 7 2, 5 5 1, 2 7 1,              |                   | 3 8 3,  |        |
|                   | 0 9 1, -1 3 6, -1 5 2, -2 4 1, 4 4 1,            |                   | 4 4 0,  |        |
|                   | 1 11 3, 2 5 8, 7 10 5, -2 13 5, 4 4 6,           |                   | 2 4 3,  |        |
|                   | 5 8 4, -3 4 1, 3 9 1, 3 7 1, 2 10 6,             |                   | 1 1 3,  |        |
|                   | 1 7 3, 5 13 6, 3 5 1, -1 8 7, 2 5 1,             |                   | -1 7 0, |        |
| PLAT941_ALERT_3_G | Average HKL Measurement Multiplicity .....       |                   | 3.4     | Low    |
| PLAT969_ALERT_5_G | The 'Henn et al.' R-Factor-gap value .....       |                   | 4.407   | Note   |

Predicted wR2: Based on SigI\*\*2 4.58 or SHELX Weight 19.30

|                   |                                                  |         |                             |               |
|-------------------|--------------------------------------------------|---------|-----------------------------|---------------|
| PLAT978_ALERT_2_G | Number C-C Bonds with Positive Residual Density. |         | 0                           | Info          |
| PLAT984_ALERT_1_G | The C-f' =                                       | 0.0147  | Deviates from the B&C-Value | 0.0137 Check  |
| PLAT984_ALERT_1_G | The N-f' =                                       | 0.0253  | Deviates from the B&C-Value | 0.0241 Check  |
| PLAT984_ALERT_1_G | The O-f' =                                       | 0.0412  | Deviates from the B&C-Value | 0.0389 Check  |
| PLAT984_ALERT_1_G | The Pb-f' =                                      | -4.2646 | Deviates from the B&C-Value | -4.4950 Check |
| PLAT985_ALERT_1_G | The Al-f" =                                      | 0.1843  | Deviates from the B&C-Value | 0.1873 Check  |
| PLAT985_ALERT_1_G | The Pb-f" =                                      | 7.1982  | Deviates from the B&C-Value | 6.8412 Check  |
| PLAT985_ALERT_1_G | The S-f" =                                       | 0.4242  | Deviates from the B&C-Value | 0.4295 Check  |

---

1 **ALERT level A** = Most likely a serious problem - resolve or explain  
3 **ALERT level B** = A potentially serious problem, consider carefully  
43 **ALERT level C** = Check. Ensure it is not caused by an omission or oversight  
88 **ALERT level G** = General information/check it is not something unexpected

14 ALERT type 1 CIF construction/syntax error, inconsistent or missing data  
51 ALERT type 2 Indicator that the structure model may be wrong or deficient  
15 ALERT type 3 Indicator that the structure quality may be low  
45 ALERT type 4 Improvement, methodology, query or suggestion  
10 ALERT type 5 Informative message, check

---

## checkCIF publication errors

---

### Alert level A

PUBL004\_ALERT\_1\_A The contact author's name and address are missing,  
    \_publ\_contact\_author\_name and \_publ\_contact\_author\_address.  
PUBL005\_ALERT\_1\_A \_publ\_contact\_author\_email, \_publ\_contact\_author\_fax and  
    \_publ\_contact\_author\_phone are all missing.  
    At least one of these should be present.  
PUBL006\_ALERT\_1\_A \_publ\_requested\_journal is missing  
    e.g. 'Acta Crystallographica Section C'  
PUBL008\_ALERT\_1\_A \_publ\_section\_title is missing. Title of paper.  
PUBL009\_ALERT\_1\_A \_publ\_author\_name is missing. List of author(s) name(s).  
PUBL010\_ALERT\_1\_A \_publ\_author\_address is missing. Author(s) address(es).  
PUBL012\_ALERT\_1\_A \_publ\_section\_abstract is missing.  
    Abstract of paper in English.

---

7 **ALERT level A** = Data missing that is essential or data in wrong format  
0 **ALERT level G** = General alerts. Data that may be required is missing

---

## Publication of your CIF

You should attempt to resolve as many as possible of the alerts in all categories. Often the minor alerts point to easily fixed oversights, errors and omissions in your CIF or refinement strategy, so attention to these fine details can be worthwhile. In order to resolve some of the more serious problems it may be necessary to carry out additional measurements or structure refinements. However, the nature of your study may justify the reported deviations from journal submission requirements and the more serious of these should be commented upon in the discussion or experimental section of a paper or in the "special\_details" fields of the CIF. *checkCIF* was carefully designed to identify outliers and unusual parameters, but every test has its limitations and alerts that are not important in a particular case may appear. Conversely, the absence of alerts does not guarantee there are no aspects of the results needing attention. It is up to the individual to critically assess their own results and, if necessary, seek expert advice.

If level A alerts remain, which you believe to be justified deviations, and you intend to submit this CIF for publication in a journal, you should additionally insert an explanation in your CIF using the Validation Reply Form (VRF) below. This will allow your explanation to be considered as part of the review process.

## Validation response form

Please find below a validation response form (VRF) that can be filled in and pasted into your CIF.

```
# start Validation Reply Form
_vrf_PUBL004_GLOBAL
;
PROBLEM: The contact author's name and address are missing,
RESPONSE: ...
;
_vrf_PUBL005_GLOBAL
;
PROBLEM: _publ_contact_author_email, _publ_contact_author_fax and
RESPONSE: ...
;
_vrf_PUBL006_GLOBAL
;
PROBLEM: _publ_requested_journal is missing
RESPONSE: ...
;
_vrf_PUBL008_GLOBAL
;
PROBLEM: _publ_section_title is missing. Title of paper.
RESPONSE: ...
;
_vrf_PUBL009_GLOBAL
;
PROBLEM: _publ_author_name is missing. List of author(s) name(s).
RESPONSE: ...
;
_vrf_PUBL010_GLOBAL
;
PROBLEM: _publ_author_address is missing. Author(s) address(es).
```



```
RESPONSE: ...  
;  
_vrf_PUBL012_GLOBAL  
;  
PROBLEM: _publ_section_abstract is missing.  
RESPONSE: ...  
;  
# end Validation Reply Form
```

If you wish to submit your CIF for publication in Acta Crystallographica Section C or E, you should upload your CIF via the web. If you wish to submit your CIF for publication in IUCrData you should upload your CIF via the web. If your CIF is to form part of a submission to another IUCr journal, you will be asked, either during electronic submission or by the Co-editor handling your paper, to upload your CIF via our web site.

---

**PLATON version of 15/07/2024; check.def file version of 15/07/2024**

Datablock SAIOC-1@G6 - ellipsoid plot

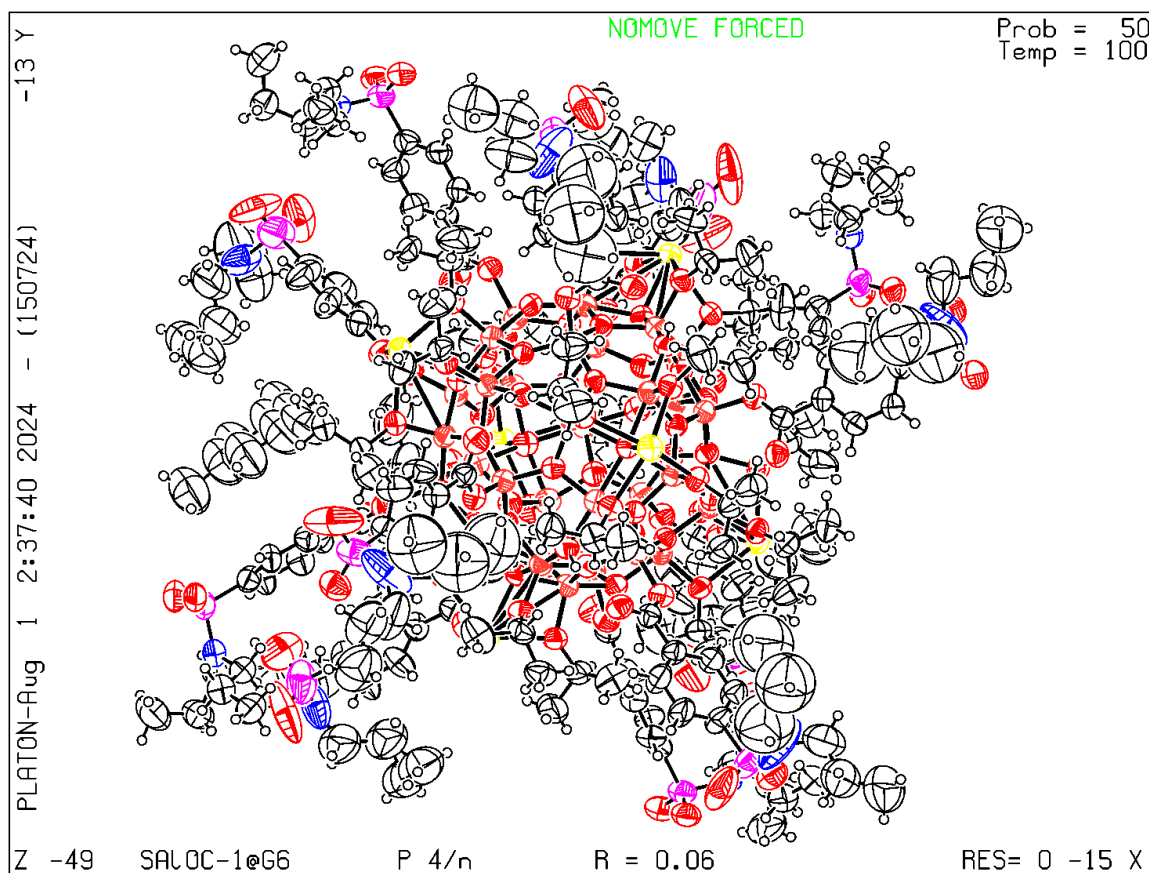

Supplement: Supplementary file 4 [file 2a3c1f07db5d1788d657b32e.pdf]
