# Supplementary material for: Precise Nanochemistry of Spherical Aluminum Oxo Clusters for Accurate Surface Guest Recognition and Release
Source: Research Square preprint supplement (doi:10.21203/rs.3.rs-4948547/v1), 2024-11-06

## checkCIF/PLATON report

Structure factors have been supplied for datablock(s) SAIOC-1@G10

THIS REPORT IS FOR GUIDANCE ONLY. IF USED AS PART OF A REVIEW PROCEDURE FOR PUBLICATION, IT SHOULD NOT REPLACE THE EXPERTISE OF AN EXPERIENCED CRYSTALLOGRAPHIC REFEREE.

No syntax errors found.      CIF dictionary      Interpreting this report

### Datablock: SAIOC-1@G10

---

|                        |                                                                |                                                 |                           |
|------------------------|----------------------------------------------------------------|-------------------------------------------------|---------------------------|
| Bond precision:        | C-C = 0.0221 Å                                                 | Wavelength=1.34050                              |                           |
| Cell:                  | a=29.8642 (5)<br>alpha=90                                      | b=29.8642 (5)<br>beta=90                        | c=19.3935 (4)<br>gamma=90 |
| Temperature:           | 100 K                                                          |                                                 |                           |
|                        | Calculated                                                     | Reported                                        |                           |
| Volume                 | 17296.5 (7)                                                    | 17296.5 (7)                                     |                           |
| Space group            | P 4/n                                                          | P 4/n                                           |                           |
| Hall group             | -P 4a                                                          | -P 4a                                           |                           |
| Moiety formula         | C215 H362 Al32 N12 O110 Pb6<br>S12, 3(C4 H4 N2) [+<br>solvent] | C215 H362 Al32 N12 O110 Pb6<br>S12, 3(C4 H4 N2) |                           |
| Sum formula            | C227 H374 Al32 N18 O110 Pb6<br>S12 [+ solvent]                 | C227 H374 Al32 N18 O110 Pb6<br>S12              |                           |
| Mr                     | 7606.74                                                        | 7606.64                                         |                           |
| Dx, g cm <sup>-3</sup> | 1.461                                                          | 1.461                                           |                           |
| Z                      | 2                                                              | 2                                               |                           |
| Mu (mm <sup>-1</sup> ) | 5.132                                                          | 5.276                                           |                           |
| F000                   | 7684.0                                                         | 7684.0                                          |                           |
| F000'                  | 7663.15                                                        |                                                 |                           |
| h, k, lmax             | 35, 35, 22                                                     | 35, 33, 22                                      |                           |
| Nref                   | 14768                                                          | 14723                                           |                           |
| Tmin, Tmax             |                                                                | 1.000, 1.000                                    |                           |
| Tmin'                  |                                                                |                                                 |                           |

Correction method= # Reported T Limits: Tmin=1.000 Tmax=1.000  
AbsCorr = SPHERE

Data completeness= 0.997

Theta(max)= 52.046

R(reflections)= 0.0819( 10548)

wR2(reflections)=  
0.2538( 14723)

S = 1.039

Npar= 897

---

The following ALERTS were generated. Each ALERT has the format  
**test-name\_ALERT\_alert-type\_alert-level**.  
Click on the hyperlinks for more details of the test.

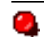

#### Alert level A

PLAT973\_ALERT\_2\_A Check Calcd Positive Resid. Density on Pb3 2.95 eA-3

**Author Response:** These alerts are generated because of residual density peaks near the heaviest atoms in the structure, due to fourier termination ripples. After inspection, the residual electron density peak does not make chemical sense and will not affect the correct identification of the structure.

PLAT973\_ALERT\_2\_A Check Calcd Positive Resid. Density on Pb2 2.48 eA-3

**Author Response:** These alerts are generated because of residual density peaks near the heaviest atoms in the structure, due to fourier termination ripples. After inspection, the residual electron density peak does not make chemical sense and will not affect the correct identification of the structure.

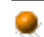

#### Alert level B

PLAT241\_ALERT\_2\_B High 'MainMol' Ueq as Compared to Neighbors of C7 Check

**Author Response:** These alerts are generated because there is a large amount of disorder in the structure. Some refined commands such as DELU, SIMU and ISOR were used to address such abnormal Ueq value, but failed. After inspection, this does not affect the correct assignment of atom types.

PLAT241\_ALERT\_2\_B High 'MainMol' Ueq as Compared to Neighbors of C8 Check

**Author Response:** These alerts are generated because there is a large amount of disorder in the structure. Some refined commands such as DELU, SIMU and ISOR were used to address such abnormal Ueq value, but failed. After inspection, this does not affect the correct assignment of atom types.

PLAT241\_ALERT\_2\_B High 'MainMol' Ueq as Compared to Neighbors of C23 Check

**Author Response:** These alerts are generated because there is a large amount of disorder in the structure. Some refined commands such as DELU, SIMU and ISOR were used to address such abnormal Ueq value, but failed. After inspection, this does not affect the correct assignment of atom types.

PLAT241\_ALERT\_2\_B High 'MainMol' Ueq as Compared to Neighbors of C53 Check

**Author Response:** These alerts are generated because there is a large amount of disorder in the structure. Some refined commands such as DELU, SIMU and ISOR were used to address such abnormal Ueq value, but failed. After inspection, this does not affect the correct assignment of atom types.

PLAT242\_ALERT\_2\_B Low 'MainMol' Ueq as Compared to Neighbors of N1 Check

**Author Response:** These alerts are generated because there is a large amount of disorder in the structure. Some refined commands such as DELU, SIMU and ISOR were used to address such abnormal Ueq value, but failed. After inspection, this does not affect the correct assignment of atom types.

PLAT242\_ALERT\_2\_B Low 'MainMol' Ueq as Compared to Neighbors of N2 Check

**Author Response:** These alerts are generated because there is a large amount of disorder in the structure. Some refined commands such as DELU, SIMU and ISOR were used to address such abnormal Ueq value, but failed. After inspection, this does not affect the correct assignment of atom types.

PLAT242\_ALERT\_2\_B Low 'MainMol' Ueq as Compared to Neighbors of N3 Check

**Author Response:** These alerts are generated because there is a large amount of disorder in the structure. Some refined commands such as DELU, SIMU and ISOR were used to address such abnormal Ueq value, but failed. After inspection, this does not affect the correct assignment of atom types.

PLAT242\_ALERT\_2\_B Low 'MainMol' Ueq as Compared to Neighbors of C38 Check

**Author Response:** These alerts are generated because there is a large amount of disorder in the structure. Some refined commands such as DELU, SIMU and ISOR were used to address such abnormal Ueq value, but failed. After inspection, this does not affect the correct assignment of atom types.

PLAT342\_ALERT\_3\_B Low Bond Precision on C-C Bonds ..... 0.0221 Ang.

**Author Response:** These alerts are generated because there is a large amount of disorder in the structure. Some refined commands such as DELU, SIMU and ISOR were used to address, but failed. After inspection, this does not affect the correct assignment of atom types.

PLAT971\_ALERT\_2\_B Check Calcd Resid. Dens. 1.18Ang From Pb2 2.74 eA-3

**Author Response:** These alerts are generated because of residual density peaks near the heaviest atoms in the structure, due to fourier termination ripples. After inspection, the residual electron density peak does not make chemical sense and will not affect the correct identification of the structure.

PLAT971\_ALERT\_2\_B Check Calcd Resid. Dens. 1.40Ang From Pb1 2.61 eA-3

**Author Response:** These alerts are generated because of residual density peaks near the heaviest atoms in the structure, due to fourier termination ripples. After inspection, the residual electron density peak does not make chemical sense and will not affect the correct identification of the structure.

PLAT973\_ALERT\_2\_B Check Calcd Positive Resid. Density on Pb1 1.94 eA-3

**Author Response:** These alerts are generated because of residual density peaks near the heaviest atoms in the structure, due to fourier termination ripples. After inspection, the residual electron density peak does not make chemical sense and will not affect the correct identification of the structure.

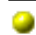

#### Alert level C

RADNW01\_ALERT\_1\_C The radiation wavelength lies outside the expected range for the supplied radiation type. Expected range 1.34130-1.34150  
Wavelength given = 1.34050

THETM01\_ALERT\_3\_C The value of sine(theta\_max)/wavelength is less than 0.590  
Calculated sin(theta\_max)/wavelength = 0.5882

PLAT094\_ALERT\_2\_C Ratio of Maximum / Minimum Residual Density .... 2.53 Report

PLAT220\_ALERT\_2\_C NonSolvent Resd 1 C Ueq(max)/Ueq(min) Range 4.2 Ratio

PLAT220\_ALERT\_2\_C NonSolvent Resd 1 O Ueq(max)/Ueq(min) Range 4.1 Ratio

PLAT222\_ALERT\_3\_C NonSolvent Resd 1 H Uiso(max)/Uiso(min) Range 6.0 Ratio

PLAT241\_ALERT\_2\_C High 'MainMol' Ueq as Compared to Neighbors of 013 Check

**Author Response:** These alerts are generated because there is a large amount of disorder in the structure. Some refined commands such as DELU, SIMU and ISOR were used to address such abnormal Ueq value, but failed. After inspection, this does not affect the correct assignment of atom types.

PLAT241\_ALERT\_2\_C High 'MainMol' Ueq as Compared to Neighbors of C11 Check

**Author Response:** These alerts are generated because there is a large amount of disorder in the structure. Some refined commands such as DELU, SIMU and ISOR were used to address such abnormal Ueq value, but failed. After inspection, this does not affect the correct assignment of atom types.

PLAT241\_ALERT\_2\_C High 'MainMol' Ueq as Compared to Neighbors of C12 Check

**Author Response:** These alerts are generated because there is a large amount of disorder in the structure. Some refined commands such as DELU, SIMU and ISOR were used to address such abnormal Ueq value, but failed. After inspection, this does not affect the correct assignment of atom types.

PLAT241\_ALERT\_2\_C High 'MainMol' Ueq as Compared to Neighbors of C24 Check

**Author Response:** These alerts are generated because there is a large amount of disorder in the structure. Some refined commands such as DELU, SIMU and ISOR were used to address such abnormal Ueq value, but failed. After inspection, this does not affect the correct assignment of atom types.

PLAT241\_ALERT\_2\_C High 'MainMol' Ueq as Compared to Neighbors of C31 Check

**Author Response:** These alerts are generated because there is a large amount of disorder in the structure. Some refined commands such as DELU, SIMU and ISOR were used to address such abnormal Ueq value, but failed. After inspection, this does not affect the correct assignment of atom types.

PLAT241\_ALERT\_2\_C High 'MainMol' Ueq as Compared to Neighbors of C49 Check

**Author Response:** These alerts are generated because there is a large amount of disorder in the structure. Some refined commands such as DELU, SIMU and ISOR were used to address such abnormal Ueq value, but failed. After inspection, this does not affect the correct assignment of atom types.

PLAT241\_ALERT\_2\_C High 'MainMol' Ueq as Compared to Neighbors of C51 Check

**Author Response:** These alerts are generated because there is a large amount of disorder in the structure. Some refined commands such as DELU, SIMU and ISOR were used to address such abnormal Ueq value, but failed. After inspection, this does not affect the correct assignment of atom types.

PLAT241\_ALERT\_2\_C High 'MainMol' Ueq as Compared to Neighbors of C56 Check

**Author Response:** These alerts are generated because there is a large amount of disorder in the structure. Some refined commands such as DELU, SIMU and ISOR were used to address such abnormal Ueq value, but failed. After inspection, this does not affect the correct assignment of atom types.

PLAT242\_ALERT\_2\_C Low 'MainMol' Ueq as Compared to Neighbors of C19 Check

**Author Response:** These alerts are generated because there is a large amount of disorder in the structure. Some refined commands such as DELU, SIMU and ISOR were used to address such abnormal Ueq value, but failed. After inspection, this does not affect the correct assignment of atom types.

PLAT242\_ALERT\_2\_C Low 'MainMol' Ueq as Compared to Neighbors of C35 Check

**Author Response:** These alerts are generated because there is a large amount of disorder in the structure. Some refined commands such as DELU, SIMU and ISOR were used to address such abnormal Ueq value, but failed. After inspection, this does not affect the correct assignment of atom types.

PLAT242\_ALERT\_2\_C Low 'MainMol' Ueq as Compared to Neighbors of C41 Check

**Author Response:** These alerts are generated because there is a large amount of disorder in the structure. Some refined commands such as DELU, SIMU and ISOR were used to address such abnormal Ueq value, but failed. After inspection, this does not affect the correct assignment of atom types.

PLAT242\_ALERT\_2\_C Low 'MainMol' Ueq as Compared to Neighbors of C50 Check

**Author Response:** These alerts are generated because there is a large amount of disorder in the structure. Some refined commands such as DELU, SIMU and ISOR were used to address such abnormal Ueq value, but failed. After inspection, this does not affect the correct assignment of atom types.

|                   |                                                    |               |        |             |
|-------------------|----------------------------------------------------|---------------|--------|-------------|
| PLAT260_ALERT_2_C | Large Average Ueq of Residue Including             | Pb1           | 0.140  | Check       |
| PLAT260_ALERT_2_C | Large Average Ueq of Residue Including             | N4            | 0.185  | Check       |
| PLAT413_ALERT_2_C | Short Inter XH3 .. XHn                             | H21A ..H21C   | .      | 2.14 Ang.   |
|                   |                                                    | 1/2-x,3/2-y,z | =      | 2_565 Check |
| PLAT905_ALERT_3_C | Negative K value in the Analysis of Variance ...   |               | -0.951 | Report      |
| PLAT911_ALERT_3_C | Missing FCF Refl Between Thmin & STh/L=            | 0.588         |        | 43 Report   |
|                   | 2 2 0, -1 3 0, 8 10 0, -1 13 0, -2 28 0, 4 34 0,   |               |        |             |
|                   | 0 3 1, -3 4 1, -2 4 1, -5 22 1, -2 28 1, 4 34 1,   |               |        |             |
|                   | 0 1 2, 3 4 2, -2 5 2, 4 7 2, -1 9 2, 9 10 2,       |               |        |             |
|                   | -4 24 2, -3 26 2, -1 29 2, 3 33 2, 0 30 3, 1 31 3, |               |        |             |
|                   | 5 34 3, 2 5 4, -5 18 4, -1 28 4, 4 33 4, -1 4 5,   |               |        |             |

1 9 5, 6 9 5, 5 33 5, -1 3 6, 10 10 6, -6 11 6,  
 -4 14 6, -1 26 6, 3 12 7, 4 12 7, 6 32 7, 1 26 8,  
 5 7 9,

PLAT971\_ALERT\_2\_C Check Calcd Resid. Dens. 1.54Ang From Pb3 2.45 eA-3

**Author Response:** These alerts are generated because of residual density peaks near the heaviest atoms in the structure, due to fourier termination ripples. After inspection, the residual electron density peak does not make chemical sense and will not affect the correct identification of the structure.

PLAT971\_ALERT\_2\_C Check Calcd Resid. Dens. 0.89Ang From O7 2.44 eA-3

**Author Response:** These alerts are generated because of residual density peaks near the heaviest atoms in the structure, due to fourier termination ripples. After inspection, the residual electron density peak does not make chemical sense and will not affect the correct identification of the structure.

PLAT971\_ALERT\_2\_C Check Calcd Resid. Dens. 0.77Ang From Pb2 2.43 eA-3

**Author Response:** These alerts are generated because of residual density peaks near the heaviest atoms in the structure, due to fourier termination ripples. After inspection, the residual electron density peak does not make chemical sense and will not affect the correct identification of the structure.

PLAT971\_ALERT\_2\_C Check Calcd Resid. Dens. 1.17Ang From Pb2 2.42 eA-3

**Author Response:** These alerts are generated because of residual density peaks near the heaviest atoms in the structure, due to fourier termination ripples. After inspection, the residual electron density peak does not make chemical sense and will not affect the correct identification of the structure.

PLAT971\_ALERT\_2\_C Check Calcd Resid. Dens. 1.07Ang From Pb3 2.29 eA-3

**Author Response:** These alerts are generated because of residual density peaks near the heaviest atoms in the structure, due to fourier termination ripples. After inspection, the residual electron density peak does not make chemical sense and will not affect the correct identification of the structure.

PLAT971\_ALERT\_2\_C Check Calcd Resid. Dens. 1.00Ang From Pb1 2.23 eA-3

**Author Response:** These alerts are generated because of residual density peaks near the heaviest atoms in the structure, due to fourier termination ripples. After inspection, the residual electron density peak does not make chemical sense and will not affect the correct identification of the structure.

PLAT971\_ALERT\_2\_C Check Calcd Resid. Dens. 0.76Ang From O27 2.18 eA-3

**Author Response:** These alerts are generated because of residual density peaks near the heaviest atoms in the structure, due to fourier termination ripples. After inspection, the residual electron density peak does not make chemical sense and will not affect the correct identification of the structure.

PLAT971\_ALERT\_2\_C Check Calcd Resid. Dens. 0.81Ang From Pb2 2.14 eA-3

**Author Response:** These alerts are generated because of residual density peaks near the heaviest atoms in the structure, due to fourier termination ripples. After inspection, the residual electron density peak does not make chemical sense and will not affect the correct identification of the structure.

PLAT971\_ALERT\_2\_C Check Calcd Resid. Dens. 0.78Ang From Pb2 1.97 eA-3

**Author Response:** These alerts are generated because of residual density peaks near the heaviest atoms in the structure, due to fourier termination ripples. After inspection, the residual electron density peak does not make chemical sense and will not affect the correct identification of the structure.

PLAT977\_ALERT\_2\_C Check Negative Difference Density on H18B . -0.31 eA-3

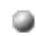

#### Alert level G

ABSMU01\_ALERT\_1\_G Calculation of \_exptl\_absorpt\_correction\_mu  
not performed for this radiation type.

|                                                                    |        |        |
|--------------------------------------------------------------------|--------|--------|
| PLAT002_ALERT_2_G Number of Distance or Angle Restraints on AtSite | 24     | Note   |
| PLAT003_ALERT_2_G Number of Uiso or U(i,j) Restrained non-H Atoms  | 31     | Report |
| PLAT007_ALERT_5_G Number of Unrefined Donor-H Atoms .....          | 2      | Report |
| H11 H24                                                            |        |        |
| PLAT051_ALERT_1_G Mu(calc) and Mu(CIF) Ratio Differs from 1.0 by . | 2.73   | %      |
| PLAT072_ALERT_2_G SHELXL First Parameter in WGHT Unusually Large   | 0.17   | Report |
| PLAT083_ALERT_2_G SHELXL Second Parameter in WGHT Unusually Large  | 19.53  | Why ?  |
| PLAT172_ALERT_4_G The CIF-Embedded .res File Contains DFIX Records | 26     | Report |
| PLAT177_ALERT_4_G The CIF-Embedded .res File Contains DELU Records | 4      | Report |
| PLAT178_ALERT_4_G The CIF-Embedded .res File Contains SIMU Records | 4      | Report |
| PLAT186_ALERT_4_G The CIF-Embedded .res File Contains ISOR Records | 2      | Report |
| PLAT188_ALERT_3_G A Non-default SIMU Restraint Value has been used | 0.0100 | Report |
| PLAT188_ALERT_3_G A Non-default SIMU Restraint Value has been used | 0.0100 | Report |
| PLAT188_ALERT_3_G A Non-default SIMU Restraint Value has been used | 0.0100 | Report |
| PLAT188_ALERT_3_G A Non-default SIMU Restraint Value has been used | 0.0100 | Report |
| PLAT192_ALERT_3_G A Non-default DELU Restraint Value for SecondPar | 0.0200 | Report |
| PLAT192_ALERT_3_G A Non-default DELU Restraint Value for SecondPar | 0.0200 | Report |
| PLAT192_ALERT_3_G A Non-default DELU Restraint Value for SecondPar | 0.0200 | Report |
| PLAT192_ALERT_3_G A Non-default DELU Restraint Value for SecondPar | 0.0200 | Report |
| PLAT300_ALERT_4_G Atom Site Occupancy of C57 Constrained at        | 0.75   | Check  |
| PLAT300_ALERT_4_G Atom Site Occupancy of H57A Constrained at       | 0.75   | Check  |
| PLAT300_ALERT_4_G Atom Site Occupancy of H57B Constrained at       | 0.75   | Check  |
| PLAT300_ALERT_4_G Atom Site Occupancy of N4 Constrained at         | 0.75   | Check  |
| PLAT300_ALERT_4_G Atom Site Occupancy of N5 Constrained at         | 0.75   | Check  |



|                   |                                                  |                     |       |       |
|-------------------|--------------------------------------------------|---------------------|-------|-------|
| PLAT300_ALERT_4_G | Atom Site Occupancy of C1                        | Constrained at      | 0.75  | Check |
| PLAT300_ALERT_4_G | Atom Site Occupancy of C2                        | Constrained at      | 0.75  | Check |
| PLAT300_ALERT_4_G | Atom Site Occupancy of C3                        | Constrained at      | 0.75  | Check |
| PLAT300_ALERT_4_G | Atom Site Occupancy of C4                        | Constrained at      | 0.75  | Check |
| PLAT300_ALERT_4_G | Atom Site Occupancy of H1                        | Constrained at      | 0.75  | Check |
| PLAT300_ALERT_4_G | Atom Site Occupancy of H2                        | Constrained at      | 0.75  | Check |
| PLAT300_ALERT_4_G | Atom Site Occupancy of H3                        | Constrained at      | 0.75  | Check |
| PLAT300_ALERT_4_G | Atom Site Occupancy of H4                        | Constrained at      | 0.75  | Check |
| PLAT301_ALERT_3_G | Main Residue Disorder .....                      | (Resd 1)            | 1%    | Note  |
| PLAT302_ALERT_4_G | Anion/Solvent/Minor-Residue Disorder             | (Resd 2)            | 100%  | Note  |
| PLAT304_ALERT_4_G | Non-Integer Number of Atoms in .....             | (Resd 2)            | 7.50  | Check |
| PLAT343_ALERT_2_G | Unusual sp3 Angle Range in Main Residue for      |                     | C8    | Check |
| PLAT432_ALERT_2_G | Short Inter X...Y Contact C21 ..C21 .            |                     | 3.20  | Ang.  |
|                   |                                                  | $1/2-x, 3/2-y, z =$ | 2_565 | Check |
| PLAT605_ALERT_4_G | Largest Solvent Accessible VOID in the Structure |                     | 146   | A**3  |
| PLAT764_ALERT_4_G | Overcomplete CIF Bond List Detected (Rep/Expd) . |                     | 1.13  | Ratio |
| PLAT779_ALERT_4_G | Suspect or Irrelevant (Bond) Angle(s) in CIF ... |                     | 0.00  | Deg.  |
|                   | 07 -07 -PB1 4_555 1_555 1_555 .....              | # 208               | Check |       |
| PLAT779_ALERT_4_G | Suspect or Irrelevant (Bond) Angle(s) in CIF ... |                     | 0.00  | Deg.  |
|                   | 07 -07 -PB1 2_555 1_555 1_555 .....              | # 209               | Check |       |
| PLAT779_ALERT_4_G | Suspect or Irrelevant (Bond) Angle(s) in CIF ... |                     | 0.00  | Deg.  |
|                   | 07 -07 -PB1 3_555 1_555 1_555 .....              | # 210               | Check |       |
| PLAT779_ALERT_4_G | Suspect or Irrelevant (Bond) Angle(s) in CIF ... |                     | 0.00  | Deg.  |
|                   | 07 -07 -AL1 2_555 1_555 2_555 .....              | # 211               | Check |       |
| PLAT779_ALERT_4_G | Suspect or Irrelevant (Bond) Angle(s) in CIF ... |                     | 0.00  | Deg.  |
|                   | 07 -07 -AL1 4_555 1_555 4_555 .....              | # 212               | Check |       |
| PLAT779_ALERT_4_G | Suspect or Irrelevant (Bond) Angle(s) in CIF ... |                     | 0.00  | Deg.  |
|                   | 07 -07 -AL1 4_555 1_555 2_555 .....              | # 213               | Check |       |
| PLAT779_ALERT_4_G | Suspect or Irrelevant (Bond) Angle(s) in CIF ... |                     | 0.00  | Deg.  |
|                   | 07 -07 -AL1 4_555 1_555 3_555 .....              | # 214               | Check |       |
| PLAT779_ALERT_4_G | Suspect or Irrelevant (Bond) Angle(s) in CIF ... |                     | 0.00  | Deg.  |
|                   | 07 -07 -AL1 2_555 1_555 4_555 .....              | # 215               | Check |       |
| PLAT779_ALERT_4_G | Suspect or Irrelevant (Bond) Angle(s) in CIF ... |                     | 0.00  | Deg.  |
|                   | 07 -07 -AL1 4_555 1_555 1_555 .....              | # 216               | Check |       |
| PLAT779_ALERT_4_G | Suspect or Irrelevant (Bond) Angle(s) in CIF ... |                     | 0.00  | Deg.  |
|                   | 07 -07 -AL1 2_555 1_555 3_555 .....              | # 217               | Check |       |
| PLAT779_ALERT_4_G | Suspect or Irrelevant (Bond) Angle(s) in CIF ... |                     | 0.00  | Deg.  |
|                   | 07 -07 -AL1 3_555 1_555 1_555 .....              | # 218               | Check |       |
| PLAT779_ALERT_4_G | Suspect or Irrelevant (Bond) Angle(s) in CIF ... |                     | 0.00  | Deg.  |
|                   | 07 -07 -AL1 3_555 1_555 2_555 .....              | # 219               | Check |       |
| PLAT779_ALERT_4_G | Suspect or Irrelevant (Bond) Angle(s) in CIF ... |                     | 0.00  | Deg.  |
|                   | 07 -07 -AL1 2_555 1_555 1_555 .....              | # 220               | Check |       |
| PLAT779_ALERT_4_G | Suspect or Irrelevant (Bond) Angle(s) in CIF ... |                     | 0.00  | Deg.  |
|                   | 07 -07 -AL1 3_555 1_555 3_555 .....              | # 221               | Check |       |
| PLAT779_ALERT_4_G | Suspect or Irrelevant (Bond) Angle(s) in CIF ... |                     | 0.00  | Deg.  |
|                   | 07 -07 -AL1 3_555 1_555 4_555 .....              | # 222               | Check |       |
| PLAT779_ALERT_4_G | Suspect or Irrelevant (Bond) Angle(s) in CIF ... |                     | 0.00  | Deg.  |
|                   | 07 -07 -07 4_555 1_555 2_555 .....               | # 223               | Check |       |
| PLAT779_ALERT_4_G | Suspect or Irrelevant (Bond) Angle(s) in CIF ... |                     | 0.00  | Deg.  |
|                   | 07 -07 -07 4_555 1_555 3_555 .....               | # 224               | Check |       |
| PLAT779_ALERT_4_G | Suspect or Irrelevant (Bond) Angle(s) in CIF ... |                     | 0.00  | Deg.  |
|                   | 07 -07 -07 3_555 1_555 2_555 .....               | # 225               | Check |       |
| PLAT779_ALERT_4_G | Suspect or Irrelevant (Bond) Angle(s) in CIF ... |                     | 0.00  | Deg.  |
|                   | 027 -027 -PB3 4_555 1_555 1_555 .....            | # 250               | Check |       |
| PLAT779_ALERT_4_G | Suspect or Irrelevant (Bond) Angle(s) in CIF ... |                     | 0.00  | Deg.  |
|                   | 027 -027 -PB3 3_555 1_555 1_555 .....            | # 251               | Check |       |
| PLAT779_ALERT_4_G | Suspect or Irrelevant (Bond) Angle(s) in CIF ... |                     | 0.00  | Deg.  |

|                                       |                                                  |                 |                             |            |   |             |           |
|---------------------------------------|--------------------------------------------------|-----------------|-----------------------------|------------|---|-------------|-----------|
| 027 -027 -PB3                         | 2_555                                            | 1_555           | 1_555                       | .....      | # | 252         | Check     |
| PLAT779_ALERT_4_G                     | Suspect or Irrelevant                            | (Bond)          | Angle(s)                    | in CIF ... |   |             | 0.00 Deg. |
| 027 -027 -AL8                         | 2_555                                            | 1_555           | 3_555                       | .....      | # | 253         | Check     |
| PLAT779_ALERT_4_G                     | Suspect or Irrelevant                            | (Bond)          | Angle(s)                    | in CIF ... |   |             | 0.00 Deg. |
| 027 -027 -AL8                         | 4_555                                            | 1_555           | 2_555                       | .....      | # | 254         | Check     |
| PLAT779_ALERT_4_G                     | Suspect or Irrelevant                            | (Bond)          | Angle(s)                    | in CIF ... |   |             | 0.00 Deg. |
| 027 -027 -AL8                         | 3_555                                            | 1_555           | 2_555                       | .....      | # | 255         | Check     |
| PLAT779_ALERT_4_G                     | Suspect or Irrelevant                            | (Bond)          | Angle(s)                    | in CIF ... |   |             | 0.00 Deg. |
| 027 -027 -AL8                         | 4_555                                            | 1_555           | 1_555                       | .....      | # | 256         | Check     |
| PLAT779_ALERT_4_G                     | Suspect or Irrelevant                            | (Bond)          | Angle(s)                    | in CIF ... |   |             | 0.00 Deg. |
| 027 -027 -AL8                         | 3_555                                            | 1_555           | 1_555                       | .....      | # | 257         | Check     |
| PLAT779_ALERT_4_G                     | Suspect or Irrelevant                            | (Bond)          | Angle(s)                    | in CIF ... |   |             | 0.00 Deg. |
| 027 -027 -AL8                         | 2_555                                            | 1_555           | 1_555                       | .....      | # | 258         | Check     |
| PLAT779_ALERT_4_G                     | Suspect or Irrelevant                            | (Bond)          | Angle(s)                    | in CIF ... |   |             | 0.00 Deg. |
| 027 -027 -AL8                         | 4_555                                            | 1_555           | 3_555                       | .....      | # | 259         | Check     |
| PLAT779_ALERT_4_G                     | Suspect or Irrelevant                            | (Bond)          | Angle(s)                    | in CIF ... |   |             | 0.00 Deg. |
| 027 -027 -AL8                         | 3_555                                            | 1_555           | 3_555                       | .....      | # | 260         | Check     |
| PLAT779_ALERT_4_G                     | Suspect or Irrelevant                            | (Bond)          | Angle(s)                    | in CIF ... |   |             | 0.00 Deg. |
| 027 -027 -AL8                         | 3_555                                            | 1_555           | 4_555                       | .....      | # | 261         | Check     |
| PLAT779_ALERT_4_G                     | Suspect or Irrelevant                            | (Bond)          | Angle(s)                    | in CIF ... |   |             | 0.00 Deg. |
| 027 -027 -AL8                         | 2_555                                            | 1_555           | 2_555                       | .....      | # | 262         | Check     |
| PLAT779_ALERT_4_G                     | Suspect or Irrelevant                            | (Bond)          | Angle(s)                    | in CIF ... |   |             | 0.00 Deg. |
| 027 -027 -AL8                         | 2_555                                            | 1_555           | 4_555                       | .....      | # | 263         | Check     |
| PLAT779_ALERT_4_G                     | Suspect or Irrelevant                            | (Bond)          | Angle(s)                    | in CIF ... |   |             | 0.00 Deg. |
| 027 -027 -AL8                         | 4_555                                            | 1_555           | 4_555                       | .....      | # | 264         | Check     |
| PLAT779_ALERT_4_G                     | Suspect or Irrelevant                            | (Bond)          | Angle(s)                    | in CIF ... |   |             | 0.00 Deg. |
| 027 -027 -027                         | 4_555                                            | 1_555           | 2_555                       | .....      | # | 265         | Check     |
| PLAT779_ALERT_4_G                     | Suspect or Irrelevant                            | (Bond)          | Angle(s)                    | in CIF ... |   |             | 0.00 Deg. |
| 027 -027 -027                         | 3_555                                            | 1_555           | 2_555                       | .....      | # | 266         | Check     |
| PLAT779_ALERT_4_G                     | Suspect or Irrelevant                            | (Bond)          | Angle(s)                    | in CIF ... |   |             | 0.00 Deg. |
| 027 -027 -027                         | 4_555                                            | 1_555           | 3_555                       | .....      | # | 267         | Check     |
| PLAT794_ALERT_5_G                     | Tentative Bond Valency for Pb1                   | (II)            | .                           |            |   | 2.11        | Info      |
| PLAT794_ALERT_5_G                     | Tentative Bond Valency for Pb3                   | (II)            | .                           |            |   | 2.01        | Info      |
| PLAT794_ALERT_5_G                     | Tentative Bond Valency for Al1                   | (III)           | .                           |            |   | 2.81        | Info      |
| PLAT794_ALERT_5_G                     | Tentative Bond Valency for Al2                   | (III)           | .                           |            |   | 2.82        | Info      |
| PLAT794_ALERT_5_G                     | Tentative Bond Valency for Al3                   | (III)           | .                           |            |   | 2.94        | Info      |
| PLAT794_ALERT_5_G                     | Tentative Bond Valency for Al5                   | (III)           | .                           |            |   | 2.78        | Info      |
| PLAT794_ALERT_5_G                     | Tentative Bond Valency for Al6                   | (III)           | .                           |            |   | 2.78        | Info      |
| PLAT794_ALERT_5_G                     | Tentative Bond Valency for Al8                   | (III)           | .                           |            |   | 2.81        | Info      |
| PLAT860_ALERT_3_G                     | Number of Least-Squares Restraints               | .....           |                             |            |   | 292         | Note      |
| PLAT868_ALERT_4_G                     | ALERTS Due to the Use of _smtbx_masks            | Suppressed      |                             |            |   | !           | Info      |
| PLAT883_ALERT_1_G                     | No Info/Value for _atom_sites_solution_primary   |                 |                             |            |   | Please Do ! |           |
| PLAT909_ALERT_3_G                     | Percentage of I>2sig(I) Data at Theta(Max)       | Still           |                             |            |   | 43%         | Note      |
| PLAT910_ALERT_3_G                     | Missing # of FCF Reflection(s) Below Theta(Min). |                 |                             |            |   | 2           | Note      |
| 1 1 0, 0 0 1,                         |                                                  |                 |                             |            |   |             |           |
| PLAT913_ALERT_3_G                     | Missing # of Very Strong Reflections in FCF      | ....            |                             |            |   | 1           | Note      |
| 1 1 0,                                |                                                  |                 |                             |            |   |             |           |
| PLAT933_ALERT_2_G                     | Number of HKL-OMIT Records in Embedded .res File |                 |                             |            |   | 16          | Note      |
| 0 1 2, 9 10 2, -3 4 1, -2 5 2, 3 4 2, |                                                  |                 |                             |            |   | -1 3 6,     |           |
| 4 7 2, -2 4 1, -1 9 2, 2 5 4, 5 7 9,  |                                                  |                 |                             |            |   | 6 9 5,      |           |
| 10 10 6, 8 10 0, -1 4 5, 1 9 5,       |                                                  |                 |                             |            |   |             |           |
| PLAT941_ALERT_3_G                     | Average HKL Measurement Multiplicity             | .....           |                             |            |   | 3.1         | Low       |
| PLAT951_ALERT_5_G                     | Calculated (ThMax) and CIF-Reported Kmax Differ  |                 |                             |            |   | 2           | Units     |
| PLAT969_ALERT_5_G                     | The 'Henn et al.' R-Factor-gap value             | .....           |                             |            |   | 4.630       | Note      |
| Predicted wR2: Based on SigI**2       | 5.48                                             | or SHELX Weight | 24.43                       |            |   |             |           |
| PLAT978_ALERT_2_G                     | Number C-C Bonds with Positive Residual Density. |                 |                             |            |   | 0           | Info      |
| PLAT984_ALERT_1_G                     | The C-f' =                                       | 0.0147          | Deviates from the B&C-Value |            |   | 0.0137      | Check     |

|                   |     |         |         |                             |         |       |
|-------------------|-----|---------|---------|-----------------------------|---------|-------|
| PLAT984_ALERT_1_G | The | N-f' =  | 0.0253  | Deviates from the B&C-Value | 0.0241  | Check |
| PLAT984_ALERT_1_G | The | O-f' =  | 0.0412  | Deviates from the B&C-Value | 0.0389  | Check |
| PLAT984_ALERT_1_G | The | Pb-f' = | -4.2646 | Deviates from the B&C-Value | -4.4950 | Check |
| PLAT985_ALERT_1_G | The | Al-f" = | 0.1843  | Deviates from the B&C-Value | 0.1873  | Check |
| PLAT985_ALERT_1_G | The | Pb-f" = | 7.1982  | Deviates from the B&C-Value | 6.8412  | Check |
| PLAT985_ALERT_1_G | The | S-f" =  | 0.4242  | Deviates from the B&C-Value | 0.4295  | Check |

---

2 **ALERT level A** = Most likely a serious problem - resolve or explain  
 12 **ALERT level B** = A potentially serious problem, consider carefully  
 33 **ALERT level C** = Check. Ensure it is not caused by an omission or oversight  
 101 **ALERT level G** = General information/check it is not something unexpected

11 ALERT type 1 CIF construction/syntax error, inconsistent or missing data  
 49 ALERT type 2 Indicator that the structure model may be wrong or deficient  
 19 ALERT type 3 Indicator that the structure quality may be low  
 58 ALERT type 4 Improvement, methodology, query or suggestion  
 11 ALERT type 5 Informative message, check

---

## checkCIF publication errors

---

### Alert level A

PUBL004\_ALERT\_1\_A The contact author's name and address are missing,  
                   \_publ\_contact\_author\_name and \_publ\_contact\_author\_address.  
 PUBL005\_ALERT\_1\_A \_publ\_contact\_author\_email, \_publ\_contact\_author\_fax and  
                   \_publ\_contact\_author\_phone are all missing.  
                   At least one of these should be present.  
 PUBL006\_ALERT\_1\_A \_publ\_requested\_journal is missing  
                   e.g. 'Acta Crystallographica Section C'  
 PUBL008\_ALERT\_1\_A \_publ\_section\_title is missing. Title of paper.  
 PUBL009\_ALERT\_1\_A \_publ\_author\_name is missing. List of author(s) name(s).  
 PUBL010\_ALERT\_1\_A \_publ\_author\_address is missing. Author(s) address(es).  
 PUBL012\_ALERT\_1\_A \_publ\_section\_abstract is missing.  
                   Abstract of paper in English.

---

7 **ALERT level A** = Data missing that is essential or data in wrong format  
 0 **ALERT level G** = General alerts. Data that may be required is missing

---

## Publication of your CIF

You should attempt to resolve as many as possible of the alerts in all categories. Often the minor alerts point to easily fixed oversights, errors and omissions in your CIF or refinement strategy, so attention to these fine details can be worthwhile. In order to resolve some of the more serious problems it may be necessary to carry out additional measurements or structure refinements. However, the nature of your study may justify the reported deviations from journal submission requirements and the more serious of these should be commented upon in the discussion or experimental section of a paper or in the "special\_details" fields of the CIF. *checkCIF* was carefully designed to identify outliers and unusual parameters, but every test has its limitations and alerts that are not important in a particular case may appear. Conversely, the absence of alerts does not guarantee there are no aspects of the results needing attention. It is up to the individual to critically assess their own results and, if necessary, seek expert advice.

If level A alerts remain, which you believe to be justified deviations, and you intend to submit this CIF for publication in a journal, you should additionally insert an explanation in your CIF using the Validation Reply Form (VRF) below. This will allow your explanation to be considered as part of the review process.

## Validation response form

Please find below a validation response form (VRF) that can be filled in and pasted into your CIF.

```
# start Validation Reply Form
_vrf_PUBL004_GLOBAL
;
PROBLEM: The contact author's name and address are missing,
RESPONSE: ...
;
_vrf_PUBL005_GLOBAL
;
PROBLEM: _publ_contact_author_email, _publ_contact_author_fax and
RESPONSE: ...
;
_vrf_PUBL006_GLOBAL
;
PROBLEM: _publ_requested_journal is missing
RESPONSE: ...
;
_vrf_PUBL008_GLOBAL
;
PROBLEM: _publ_section_title is missing. Title of paper.
RESPONSE: ...
;
_vrf_PUBL009_GLOBAL
;
PROBLEM: _publ_author_name is missing. List of author(s) name(s).
RESPONSE: ...
;
_vrf_PUBL010_GLOBAL
;
PROBLEM: _publ_author_address is missing. Author(s) address(es).
```

```

RESPONSE: ...
;
_vrf_PUBL012_GLOBAL
;
PROBLEM: _publ_section_abstract is missing.
RESPONSE: ...
;
# end Validation Reply Form

```

If you wish to submit your CIF for publication in Acta Crystallographica Section C or E, you should upload your CIF via the web. If you wish to submit your CIF for publication in IUCrData you should upload your CIF via the web. If your CIF is to form part of a submission to another IUCr journal, you will be asked, either during electronic submission or by the Co-editor handling your paper, to upload your CIF via our web site.

---

**PLATON version of 15/07/2024; check.def file version of 15/07/2024**

Datablock SAIOC-1@G10 - ellipsoid plot

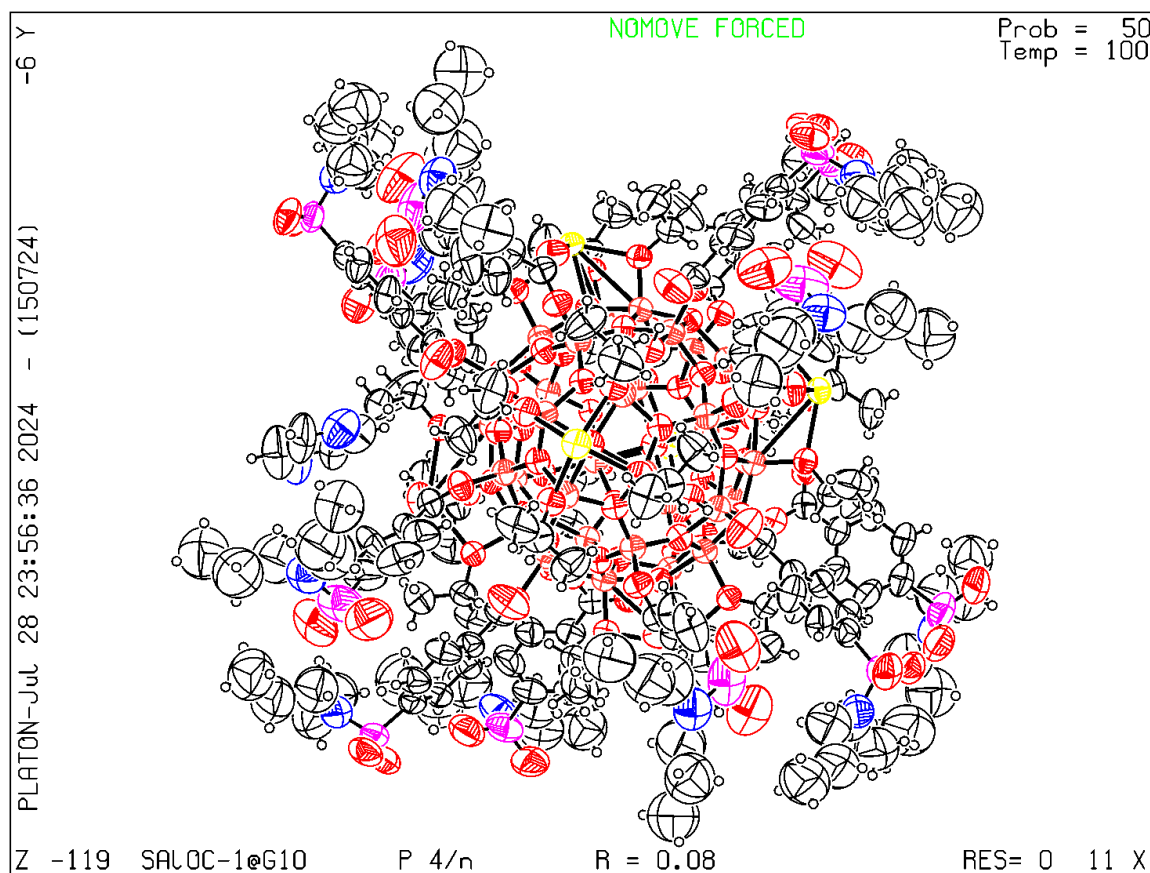

Supplement: Supplementary file 5 [file 2d78df7b41427172daa4ed40.pdf]
