# Supplementary material for: Precise Nanochemistry of Spherical Aluminum Oxo Clusters for Accurate Surface Guest Recognition and Release
Source: Research Square preprint supplement (doi:10.21203/rs.3.rs-4948547/v1), 2024-11-06

## checkCIF/PLATON report

Structure factors have been supplied for datablock(s) Al12Pb4

THIS REPORT IS FOR GUIDANCE ONLY. IF USED AS PART OF A REVIEW PROCEDURE FOR PUBLICATION, IT SHOULD NOT REPLACE THE EXPERTISE OF AN EXPERIENCED CRYSTALLOGRAPHIC REFEREE.

No syntax errors found.      CIF dictionary      Interpreting this report

### Datablock: Al12Pb4

---

|                        |                                      |                                    |               |
|------------------------|--------------------------------------|------------------------------------|---------------|
| Bond precision:        | C-C = 0.0112 A                       | Wavelength=1.34050                 |               |
| Cell:                  | a=23.5670 (2)                        | b=18.7552 (1)                      | c=24.7399 (1) |
|                        | alpha=90                             | beta=107.235 (1)                   | gamma=90      |
| Temperature:           | 100 K                                |                                    |               |
|                        | Calculated                           | Reported                           |               |
| Volume                 | 10444.12 (13)                        | 10444.12 (13)                      |               |
| Space group            | C 2/c                                | C 1 2/c 1                          |               |
| Hall group             | -C 2yc                               | -C 2yc                             |               |
| Moiety formula         | C36 H51 Al6 N O21 Pb2 [+<br>solvent] | C72 H102 Al12 O36 Pb4, 2 (N<br>O3) |               |
| Sum formula            | C36 H51 Al6 N O21 Pb2 [+<br>solvent] | C72 H102 Al12 N2 O42 Pb4           |               |
| Mr                     | 1410.06                              | 2820.07                            |               |
| Dx, g cm <sup>-3</sup> | 1.793                                | 1.793                              |               |
| Z                      | 8                                    | 4                                  |               |
| Mu (mm <sup>-1</sup> ) | 9.355                                | 9.355                              |               |
| F000                   | 5472.0                               | 5472.0                             |               |
| F000'                  | 5419.17                              |                                    |               |
| h, k, lmax             | 27, 22, 29                           | 27, 22, 29                         |               |
| Nref                   | 8917                                 | 8884                               |               |
| Tmin, Tmax             |                                      | 1.000, 1.000                       |               |
| Tmin'                  |                                      |                                    |               |

Correction method= # Reported T Limits: Tmin=1.000 Tmax=1.000  
AbsCorr = SPHERE

Data completeness= 0.996

Theta (max)= 52.048

R(reflections)= 0.0332( 8570)

wR2(reflections)=  
0.0832( 8884)

S = 1.027

Npar= 632

---

The following ALERTS were generated. Each ALERT has the format  
**test-name\_ALERT\_alert-type\_alert-level.**  
Click on the hyperlinks for more details of the test.

---

 **Alert level A**

PLAT971\_ALERT\_2\_A Check Calcd Resid. Dens. 0.80Ang From Pb1 3.76 eA-3

**Author Response:** These alerts are generated because of residual density peaks near the heaviest atoms in the structure, due to fourier termination ripples. After inspection, the residual electron density peak does not make chemical sense and will not affect the correct identification of the structure.

PLAT971\_ALERT\_2\_A Check Calcd Resid. Dens. 0.88Ang From Pb1 3.54 eA-3

**Author Response:** These alerts are generated because of residual density peaks near the heaviest atoms in the structure, due to fourier termination ripples. After inspection, the residual electron density peak does not make chemical sense and will not affect the correct identification of the structure.

---

 **Alert level B**

PLAT780\_ALERT\_1\_B Coordinates do not Form a Properly Connected Set Please Do !

**Author Response:** : It has been checked that all the atoms form a connected set.

PLAT971\_ALERT\_2\_B Check Calcd Resid. Dens. 1.13Ang From Pb2 2.72 eA-3

**Author Response:** These alerts are generated because of residual density peaks near the heaviest atoms in the structure, due to fourier termination ripples. After inspection, the residual electron density peak does not make chemical sense and will not affect the correct identification of the structure.

---

 **Alert level C**

RADNW01\_ALERT\_1\_C The radiation wavelength lies outside the expected range  
for the supplied radiation type. Expected range 1.34130-1.34150  
Wavelength given = 1.34050

THETM01\_ALERT\_3\_C The value of sine(theta\_max)/wavelength is less than 0.590  
Calculated sin(theta\_max)/wavelength = 0.5882

PLAT220\_ALERT\_2\_C NonSolvent Resd 1 C Ueq(max)/Ueq(min) Range 3.9 Ratio

|                   |            |                    |                |                                 |       |         |        |   |     |     |    |     |    |    |     |     |    |     |
|-------------------|------------|--------------------|----------------|---------------------------------|-------|---------|--------|---|-----|-----|----|-----|----|----|-----|-----|----|-----|
| PLAT220_ALERT_2_C | NonSolvent | Resd 1             | O              | Ueq(max)/Ueq(min)               | Range | 3.6     | Ratio  |   |     |     |    |     |    |    |     |     |    |     |
| PLAT222_ALERT_3_C | NonSolvent | Resd 1             | H              | Uiso(max)/Uiso(min)             | Range | 5.6     | Ratio  |   |     |     |    |     |    |    |     |     |    |     |
| PLAT241_ALERT_2_C | High       | 'MainMol'          |                | Ueq as Compared to Neighbors of |       | C35     | Check  |   |     |     |    |     |    |    |     |     |    |     |
| PLAT242_ALERT_2_C | Low        | 'MainMol'          |                | Ueq as Compared to Neighbors of |       | N1      | Check  |   |     |     |    |     |    |    |     |     |    |     |
| PLAT242_ALERT_2_C | Low        | 'MainMol'          |                | Ueq as Compared to Neighbors of |       | C2      | Check  |   |     |     |    |     |    |    |     |     |    |     |
| PLAT342_ALERT_3_C | Low        | Bond Precision on  | C-C            | Bonds                           | ..... | 0.01118 | Ang.   |   |     |     |    |     |    |    |     |     |    |     |
| PLAT911_ALERT_3_C | Missing    | FCF Refl Between   | Thmin & STh/L= | 0.588                           |       | 33      | Report |   |     |     |    |     |    |    |     |     |    |     |
|                   | 2          | 0                  | 0,             | 4                               | 4     | 0,      | 5      | 3 | 0,  | -4  | 2  | 1,  | -3 | 1  | 1,  | -2  | 4  | 1,  |
|                   | -1         | 1                  | 1,             | 1                               | 1     | 1,      | 5      | 1 | 1,  | -2  | 2  | 2,  | 0  | 0  | 2,  | 5   | 1  | 2,  |
|                   | 7          | 1                  | 2,             | -18                             | 12    | 3,      | -20    | 0 | 4,  | -10 | 4  | 4,  | 2  | 8  | 4,  | -18 | 14 | 5,  |
|                   | -3         | 1                  | 7,             | 1                               | 3     | 8,      | 16     | 8 | 9,  | -18 | 0  | 12, | 12 | 10 | 12, | 9   | 11 | 14, |
|                   | 8          | 0                  | 16,            | 11                              | 3     | 17,     | -6     | 8 | 18, | -8  | 12 | 20, | -7 | 11 | 20, | 0   | 10 | 20, |
|                   | 4          | 0                  | 22,            | -4                              | 4     | 24,     | -4     | 0 | 28, |     |    |     |    |    |     |     |    |     |
| PLAT972_ALERT_2_C | Check      | Calcd Resid. Dens. | 0.80           | Ang From                        | Pb1   | -2.37   | eA-3   |   |     |     |    |     |    |    |     |     |    |     |
| PLAT972_ALERT_2_C | Check      | Calcd Resid. Dens. | 0.65           | Ang From                        | Pb1   | -1.67   | eA-3   |   |     |     |    |     |    |    |     |     |    |     |

### Alert level G

|                   |                                                  |     |      |                                        |         |              |      |     |
|-------------------|--------------------------------------------------|-----|------|----------------------------------------|---------|--------------|------|-----|
| ABSMU01_ALERT_1_G | Calculation of _exptl_absorpt_correction_mu      |     |      | not performed for this radiation type. |         |              |      |     |
| PLAT003_ALERT_2_G | Number of Uiso or U(i,j) Restrained non-H Atoms  |     |      |                                        | 41      | Report       |      |     |
| PLAT004_ALERT_5_G | Polymeric Structure Found with Maximum Dimension |     |      |                                        | 2       | Info         |      |     |
| PLAT007_ALERT_5_G | Number of Unrefined Donor-H Atoms                |     |      | .....                                  | 1       | Report       |      |     |
|                   | H4                                               |     |      |                                        |         |              |      |     |
| PLAT042_ALERT_1_G | Calc. and Reported MoietyFormula Strings Differ  |     |      |                                        |         | Please Check |      |     |
|                   | Calc:                                            | C36 | H51  | Al6                                    | N       | O21          | Pb2  |     |
|                   | Rep.:                                            | C72 | H102 | Al12                                   | O36     | Pb4,         | 2(N  | O3) |
| PLAT045_ALERT_1_G | Calculated and Reported Z Differ by a Factor ... |     |      |                                        | 2       | Check        |      |     |
| PLAT083_ALERT_2_G | SHELXL Second Parameter in WGHT Unusually Large  |     |      |                                        | 126.26  | Why ?        |      |     |
| PLAT142_ALERT_4_G | s.u. on b - Axis Small or Missing                |     |      | .....                                  | 0.00010 | Ang.         |      |     |
| PLAT143_ALERT_4_G | s.u. on c - Axis Small or Missing                |     |      | .....                                  | 0.00010 | Ang.         |      |     |
| PLAT177_ALERT_4_G | The CIF-Embedded .res File Contains DELU Records |     |      |                                        | 2       | Report       |      |     |
| PLAT178_ALERT_4_G | The CIF-Embedded .res File Contains SIMU Records |     |      |                                        | 2       | Report       |      |     |
| PLAT186_ALERT_4_G | The CIF-Embedded .res File Contains ISOR Records |     |      |                                        | 1       | Report       |      |     |
| PLAT188_ALERT_3_G | A Non-default SIMU Restraint Value has been used |     |      |                                        | 0.0100  | Report       |      |     |
| PLAT188_ALERT_3_G | A Non-default SIMU Restraint Value has been used |     |      |                                        | 0.0100  | Report       |      |     |
| PLAT192_ALERT_3_G | A Non-default DELU Restraint Value for SecondPar |     |      |                                        | 0.0200  | Report       |      |     |
| PLAT192_ALERT_3_G | A Non-default DELU Restraint Value for SecondPar |     |      |                                        | 0.0200  | Report       |      |     |
| PLAT299_ALERT_4_G | Atom Site Occupancy Constrained at               |     |      | .....                                  | 0.5     | Check        |      |     |
|                   | O9                                               | O22 | C22  | C23                                    | C24     | C25          | H21  |     |
|                   | H22                                              | H23 | H24  | H25                                    |         |              | H21A |     |
| PLAT301_ALERT_3_G | Main Residue Disorder                            |     |      | .....(Resd                             | 1)      | 5% Note      |      |     |
| PLAT606_ALERT_4_G | Solvent Accessible VOID(S) in Structure          |     |      | .....                                  |         | ! Info       |      |     |
| PLAT794_ALERT_5_G | Tentative Bond Valency for Pb2                   |     |      | (II)                                   | 1.97    | Info         |      |     |
| PLAT794_ALERT_5_G | Tentative Bond Valency for Al1                   |     |      | (III)                                  | 2.80    | Info         |      |     |
| PLAT794_ALERT_5_G | Tentative Bond Valency for Al2                   |     |      | (III)                                  | 2.78    | Info         |      |     |
| PLAT794_ALERT_5_G | Tentative Bond Valency for Al3                   |     |      | (III)                                  | 2.76    | Info         |      |     |
| PLAT794_ALERT_5_G | Tentative Bond Valency for Al5                   |     |      | (III)                                  | 2.81    | Info         |      |     |
| PLAT794_ALERT_5_G | Tentative Bond Valency for Al6                   |     |      | (III)                                  | 2.71    | Info         |      |     |
| PLAT795_ALERT_4_G | C-Atom in CIF Coordinate List Out-of-Sequence .. |     |      |                                        | C2      | Note         |      |     |
| PLAT796_ALERT_4_G | O-Atom in CIF Coordinate List Out-of-Sequence .. |     |      |                                        | O11     | Note         |      |     |
| PLAT860_ALERT_3_G | Number of Least-Squares Restraints               |     |      | .....                                  | 314     | Note         |      |     |
| PLAT868_ALERT_4_G | ALERTS Due to the Use of _smtbx_masks Suppressed |     |      |                                        |         | ! Info       |      |     |
| PLAT909_ALERT_3_G | Percentage of I>2sig(I) Data at Theta(Max) Still |     |      |                                        | 91%     | Note         |      |     |
| PLAT913_ALERT_3_G | Missing # of Very Strong Reflections in FCF      |     |      | ....                                   | 1       | Note         |      |     |
|                   | 2                                                | 0   | 0,   |                                        |         |              |      |     |
| PLAT933_ALERT_2_G | Number of HKL-OMIT Records in Embedded .res File |     |      |                                        | 22      | Note         |      |     |

```

      11  9 21,  -3  1  1,  15  3 21,   0  0  2,  -2  2  2,   1  1  1,
      15  9 19,   5  1  2,  20  6 13,  22 14  3,  18  6 15,  -3  1  7,
      -8 12 20,  -2  4  1,   7  1  2,   4  4  0,   5  1  1,  -4  2  1,
     -10  4  4,   1  3  8,   5  3  0,   2  8  4,
PLAT969_ALERT_5_G The 'Henn et al.' R-Factor-gap value .....      4.704 Note
      Predicted wR2: Based on SigI**2  1.77 or SHELX Weight  8.10
PLAT978_ALERT_2_G Number C-C Bonds with Positive Residual Density.      0 Info

```

- 
- 2 **ALERT level A** = Most likely a serious problem - resolve or explain
  - 2 **ALERT level B** = A potentially serious problem, consider carefully
  - 12 **ALERT level C** = Check. Ensure it is not caused by an omission or oversight
  - 34 **ALERT level G** = General information/check it is not something unexpected
- 
- 5 ALERT type 1 CIF construction/syntax error, inconsistent or missing data
  - 14 ALERT type 2 Indicator that the structure model may be wrong or deficient
  - 12 ALERT type 3 Indicator that the structure quality may be low
  - 10 ALERT type 4 Improvement, methodology, query or suggestion
  - 9 ALERT type 5 Informative message, check
- 

## checkCIF publication errors

---

### Alert level A

PUBL004\_ALERT\_1\_A The contact author's name and address are missing,  
   \_publ\_contact\_author\_name and \_publ\_contact\_author\_address.

PUBL005\_ALERT\_1\_A \_publ\_contact\_author\_email, \_publ\_contact\_author\_fax and  
   \_publ\_contact\_author\_phone are all missing.  
 At least one of these should be present.

PUBL006\_ALERT\_1\_A \_publ\_requested\_journal is missing  
 e.g. 'Acta Crystallographica Section C'

PUBL008\_ALERT\_1\_A \_publ\_section\_title is missing. Title of paper.

PUBL009\_ALERT\_1\_A \_publ\_author\_name is missing. List of author(s) name(s).

PUBL010\_ALERT\_1\_A \_publ\_author\_address is missing. Author(s) address(es).

PUBL012\_ALERT\_1\_A \_publ\_section\_abstract is missing.  
 Abstract of paper in English.

- 
- 7 **ALERT level A** = Data missing that is essential or data in wrong format
  - 0 **ALERT level G** = General alerts. Data that may be required is missing
-

## Publication of your CIF

You should attempt to resolve as many as possible of the alerts in all categories. Often the minor alerts point to easily fixed oversights, errors and omissions in your CIF or refinement strategy, so attention to these fine details can be worthwhile. In order to resolve some of the more serious problems it may be necessary to carry out additional measurements or structure refinements. However, the nature of your study may justify the reported deviations from journal submission requirements and the more serious of these should be commented upon in the discussion or experimental section of a paper or in the "special\_details" fields of the CIF. *checkCIF* was carefully designed to identify outliers and unusual parameters, but every test has its limitations and alerts that are not important in a particular case may appear. Conversely, the absence of alerts does not guarantee there are no aspects of the results needing attention. It is up to the individual to critically assess their own results and, if necessary, seek expert advice.

If level A alerts remain, which you believe to be justified deviations, and you intend to submit this CIF for publication in a journal, you should additionally insert an explanation in your CIF using the Validation Reply Form (VRF) below. This will allow your explanation to be considered as part of the review process.

## Validation response form

Please find below a validation response form (VRF) that can be filled in and pasted into your CIF.

```
# start Validation Reply Form
_vrf_PUBL004_GLOBAL
;
PROBLEM: The contact author's name and address are missing,
RESPONSE: ...
;
_vrf_PUBL005_GLOBAL
;
PROBLEM: _publ_contact_author_email, _publ_contact_author_fax and
RESPONSE: ...
;
_vrf_PUBL006_GLOBAL
;
PROBLEM: _publ_requested_journal is missing
RESPONSE: ...
;
_vrf_PUBL008_GLOBAL
;
PROBLEM: _publ_section_title is missing. Title of paper.
RESPONSE: ...
;
_vrf_PUBL009_GLOBAL
;
PROBLEM: _publ_author_name is missing. List of author(s) name(s).
RESPONSE: ...
;
_vrf_PUBL010_GLOBAL
;
PROBLEM: _publ_author_address is missing. Author(s) address(es).
```

```
RESPONSE: ...  
;  
_vrf_PUBL012_GLOBAL  
;  
PROBLEM: _publ_section_abstract is missing.  
RESPONSE: ...  
;  
# end Validation Reply Form
```

If you wish to submit your CIF for publication in Acta Crystallographica Section C or E, you should upload your CIF via the web. If you wish to submit your CIF for publication in IUCrData you should upload your CIF via the web. If your CIF is to form part of a submission to another IUCr journal, you will be asked, either during electronic submission or by the Co-editor handling your paper, to upload your CIF via our web site.

---

**PLATON version of 15/07/2024; check.def file version of 15/07/2024**

Datablock All2Pb4 - ellipsoid plot

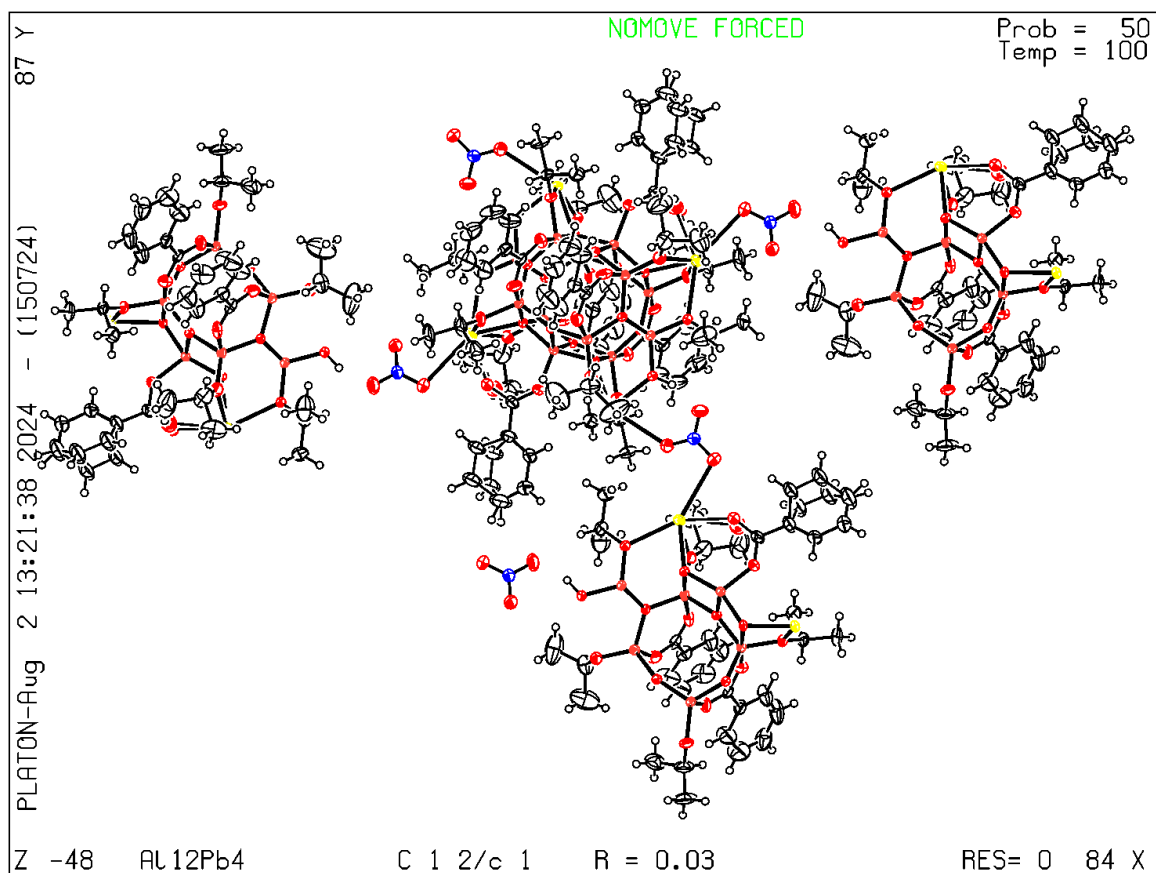

Supplement: Supplementary file 6 [file 2d7950fe68c9bf6b57bc1c5b.pdf]
