# Supplementary material for: Precise Nanochemistry of Spherical Aluminum Oxo Clusters for Accurate Surface Guest Recognition and Release
Source: Research Square preprint supplement (doi:10.21203/rs.3.rs-4948547/v1), 2024-11-06

## checkCIF/PLATON report

Structure factors have been supplied for datablock(s) SAIOC-1@G4

THIS REPORT IS FOR GUIDANCE ONLY. IF USED AS PART OF A REVIEW PROCEDURE FOR PUBLICATION, IT SHOULD NOT REPLACE THE EXPERTISE OF AN EXPERIENCED CRYSTALLOGRAPHIC REFEREE.

No syntax errors found.      CIF dictionary      Interpreting this report

### Datablock: SAIOC-1@G4

---

Bond precision:      C-C = 0.0121 A

Wavelength=1.34050

Cell:                      a=30.0800 (2)              b=30.0800 (2)              c=19.6522 (2)  
                                    alpha=90                      beta=90                      gamma=90

Temperature:              100 K

|                        | Calculated                                                      | Reported                                         |
|------------------------|-----------------------------------------------------------------|--------------------------------------------------|
| Volume                 | 17781.4 (3)                                                     | 17781.4 (3)                                      |
| Space group            | P 4/n                                                           | P 4/n                                            |
| Hall group             | -P 4a                                                           | -P 4a                                            |
| Moiety formula         | C216 H362 Al32 N12 O110 Pb6<br>S12, 3(C10 H18 O) [+<br>solvent] | C216 H362 Al32 N12 O110 Pb6<br>S12, 3(C10 H18 O) |
| Sum formula            | C246 H416 Al32 N12 O113 Pb6<br>S12 [+ solvent]                  | C246 H416 Al32 N12 O113 Pb6<br>S12               |
| Mr                     | 7841.21                                                         | 7841.10                                          |
| Dx, g cm <sup>-3</sup> | 1.464                                                           | 1.465                                            |
| Z                      | 2                                                               | 2                                                |
| Mu (mm <sup>-1</sup> ) | 5.004                                                           | 5.144                                            |
| F000                   | 7960.0                                                          | 7960.0                                           |
| F000'                  | 7939.61                                                         |                                                  |
| h, k, lmax             | 35, 35, 23                                                      | 35, 33, 23                                       |
| Nref                   | 15177                                                           | 15118                                            |
| Tmin, Tmax             |                                                                 | 1.000, 1.000                                     |
| Tmin'                  |                                                                 |                                                  |

Correction method= # Reported T Limits: Tmin=1.000 Tmax=1.000  
AbsCorr = SPHERE

Data completeness= 0.996

Theta(max)= 52.047

R(reflections)= 0.0481( 12843)

wR2(reflections)=  
0.1360( 15118)

S = 1.025

Npar= 976

---

The following ALERTS were generated. Each ALERT has the format  
**test-name\_ALERT\_alert-type\_alert-level.**  
Click on the hyperlinks for more details of the test.

---

### Alert level B

PLAT220\_ALERT\_2\_B NonSolvent Resd 1 C Ueq(max)/Ueq(min) Range 7.6 Ratio

**Author Response:** These alerts are generated because of a slight unresolved disorder caused by free rotation of the flexible chain at the end of the ligand. Some refi commands such as DELU, SIMU and ISOR were used to address such abnormal Ueq value, but failed. After inspection, this does not affect the correct assign of atom types.

PLAT241\_ALERT\_2\_B High 'MainMol' Ueq as Compared to Neighbors of C27 Check

**Author Response:** These alerts are generated because of a slight unresolved disorder caused by free rotation of the flexible chain at the end of the ligand. Some refi commands such as DELU, SIMU and ISOR were used to address such abnormal Ueq value, but failed. After inspection, this does not affect the correct assign of atom types.

PLAT242\_ALERT\_2\_B Low 'MainMol' Ueq as Compared to Neighbors of N2 Check

**Author Response:** These alerts are generated because of a slight unresolved disorder caused by free rotation of the flexible chain at the end of the ligand. Some refi commands such as DELU, SIMU and ISOR were used to address such abnormal Ueq value, but failed. After inspection, this does not affect the correct assign of atom types.

---

### Alert level C

RADNW01\_ALERT\_1\_C The radiation wavelength lies outside the expected range  
for the supplied radiation type. Expected range 1.34130-1.34150  
Wavelength given = 1.34050

THETM01\_ALERT\_3\_C The value of sine(theta\_max)/wavelength is less than 0.590  
Calculated sin(theta\_max)/wavelength = 0.5882

PLAT220\_ALERT\_2\_C NonSolvent Resd 1 O Ueq(max)/Ueq(min) Range 5.7 Ratio

**Author Response:** These alerts are generated because of a slight unresolved disorder caused by free rotation of the flexible chain at the end of the ligand. Some refi commands such as DELU, SIMU and ISOR were used to address such abnormal Ueq value, but failed. After inspection, this does not affect the correct assign of atom types.

PLAT222\_ALERT\_3\_C NonSolvent Resd 1 H Uiso(max)/Uiso(min) Range 10.0 Ratio  
PLAT241\_ALERT\_2\_C High 'MainMol' Ueq as Compared to Neighbors of C3 Check

**Author Response:** These alerts are generated because of a slight unresolved disorder caused by free rotation of the flexible chain at the end of the ligand. Some refi commands such as DELU, SIMU and ISOR were used to address such abnormal Ueq value, but failed. After inspection, this does not affect the correct assign of atom types.

PLAT241\_ALERT\_2\_C High 'MainMol' Ueq as Compared to Neighbors of C4 Check

**Author Response:** These alerts are generated because of a slight unresolved disorder caused by free rotation of the flexible chain at the end of the ligand. Some refi commands such as DELU, SIMU and ISOR were used to address such abnormal Ueq value, but failed. After inspection, this does not affect the correct assign of atom types.

PLAT241\_ALERT\_2\_C High 'MainMol' Ueq as Compared to Neighbors of C52 Check

**Author Response:** These alerts are generated because of a slight unresolved disorder caused by free rotation of the flexible chain at the end of the ligand. Some refi commands such as DELU, SIMU and ISOR were used to address such abnormal Ueq value, but failed. After inspection, this does not affect the correct assign of atom types.

PLAT241\_ALERT\_2\_C High 'MainMol' Ueq as Compared to Neighbors of C53 Check

**Author Response:** These alerts are generated because of a slight unresolved disorder caused by free rotation of the flexible chain at the end of the ligand. Some refi commands such as DELU, SIMU and ISOR were used to address such abnormal Ueq value, but failed. After inspection, this does not affect the correct assign of atom types.

PLAT242\_ALERT\_2\_C Low 'MainMol' Ueq as Compared to Neighbors of N1 Check

**Author Response:** These alerts are generated because of a slight unresolved disorder caused by free rotation of the flexible chain at the end of the ligand. Some refi commands such as DELU, SIMU and ISOR were used to address such abnormal Ueq value, but failed. After inspection, this does not affect the correct assign of atom types.

PLAT242\_ALERT\_2\_C Low 'MainMol' Ueq as Compared to Neighbors of N3 Check

**Author Response:** These alerts are generated because of a slight unresolved disorder caused by free rotation of the flexible chain at the end of the ligand. Some refi commands such as DELU, SIMU and ISOR were used to address such abnormal Ueq value, but failed. After inspection, this does not affect the correct assign of atom types.

PLAT242\_ALERT\_2\_C Low 'MainMol' Ueq as Compared to Neighbors of C2 Check

**Author Response:** These alerts are generated because of a slight unresolved disorder caused by free rotation of the flexible chain at the end of the ligand. Some refi commands such as DELU, SIMU and ISOR were used to address such abnormal Ueq value, but failed. After inspection, this does not affect the correct assign of atom types.

PLAT242\_ALERT\_2\_C Low 'MainMol' Ueq as Compared to Neighbors of C32 Check

**Author Response:** These alerts are generated because of a slight unresolved disorder caused by free rotation of the flexible chain at the end of the ligand. Some refi commands such as DELU, SIMU and ISOR were used to address such abnormal Ueq value, but failed. After inspection, this does not affect the correct assign of atom types.

PLAT242\_ALERT\_2\_C Low 'MainMol' Ueq as Compared to Neighbors of C35 Check

**Author Response:** These alerts are generated because of a slight unresolved disorder caused by free rotation of the flexible chain at the end of the ligand. Some refi commands such as DELU, SIMU and ISOR were used to address such abnormal Ueq value, but failed. After inspection, this does not affect the correct assign of atom types.

PLAT242\_ALERT\_2\_C Low 'MainMol' Ueq as Compared to Neighbors of C41 Check

**Author Response: These alerts are generated because of a slight unresolved disorder caused by free rotation of the flexible chain at the end of the ligand. Some refi commands such as DELU, SIMU and ISOR were used to address such abnormal Ueq value, but failed. After inspection, this does not affect the correct assign of atom types.**

|                   |                                                 |             |         |        |
|-------------------|-------------------------------------------------|-------------|---------|--------|
| PLAT260_ALERT_2_C | Large Average Ueq of Residue Including          | O65         | 0.193   | Check  |
| PLAT342_ALERT_3_C | Low Bond Precision on C-C Bonds .....           |             | 0.01215 | Ang.   |
| PLAT412_ALERT_2_C | Short Intra XH3 .. XHn H25B ..H27B              |             | 1.81    | Ang.   |
|                   |                                                 | x,y,z =     | 1_555   | Check  |
| PLAT414_ALERT_2_C | Short Intra D-H..H-X H18 ..H41                  |             | 1.90    | Ang.   |
|                   |                                                 | 3/2-y,x,z = | 3_655   | Check  |
| PLAT906_ALERT_3_C | Large K Value in the Analysis of Variance ..... |             | 2.743   | Check  |
| PLAT911_ALERT_3_C | Missing FCF Refl Between Thmin & STh/L=         | 0.588       | 56      | Report |
|                   | 2 2 0, 1 3 0, 3 3 0, 1 5 0, 0 6 0, 0 2 1,       |             |         |        |
|                   | 1 2 1, -1 3 1, 0 3 1, 0 5 1, 2 5 1, 3 6 1,      |             |         |        |
|                   | 2 9 1, -7 10 1, 10 13 1, 0 0 2, 0 2 2, -2 3 2,  |             |         |        |
|                   | 1 3 2, -1 4 2, 3 4 2, 1 5 2, 3 5 2, 3 6 2,      |             |         |        |
|                   | -5 7 2, 4 7 2, 1 9 2, 7 11 2, 7 13 2, 0 0 3,    |             |         |        |
|                   | 2 5 3, 0 6 3, 4 7 3, 5 7 3, -2 12 3, 3 14 3,    |             |         |        |
|                   | 0 3 4, 3 3 4, 4 4 4, -1 6 4, 2 6 4, -4 12 4,    |             |         |        |
|                   | -2 12 4, -4 5 5, -4 7 5, 3 5 6, 2 6 6, 5 6 6,   |             |         |        |
|                   | -7 9 6, 1 9 6, 11 15 6, 4 8 7, 0 10 7, 8 10 7,  |             |         |        |
|                   | 16 18 11, 17 19 11,                             |             |         |        |
| PLAT973_ALERT_2_C | Check Calcd Positive Resid. Density on          | Pb3         | 1.46    | eA-3   |
| PLAT973_ALERT_2_C | Check Calcd Positive Resid. Density on          | Pb2         | 1.39    | eA-3   |
| PLAT973_ALERT_2_C | Check Calcd Positive Resid. Density on          | Pb1         | 1.01    | eA-3   |
| PLAT976_ALERT_2_C | Check Calcd Resid. Dens. 1.05Ang From O25       |             | -0.44   | eA-3   |
| PLAT977_ALERT_2_C | Check Negative Difference Density on H18        |             | -0.39   | eA-3   |

### Alert level G

|                   |                                                                                    |  |        |        |
|-------------------|------------------------------------------------------------------------------------|--|--------|--------|
| ABSMU01_ALERT_1_G | Calculation of _exptl_absorpt_correction_mu not performed for this radiation type. |  |        |        |
| PLAT002_ALERT_2_G | Number of Distance or Angle Restraints on AtSite                                   |  | 12     | Note   |
| PLAT003_ALERT_2_G | Number of Uiso or U(i,j) Restrained non-H Atoms                                    |  | 70     | Report |
| PLAT007_ALERT_5_G | Number of Unrefined Donor-H Atoms .....                                            |  | 3      | Report |
|                   | H5 H18 H65                                                                         |  |        |        |
| PLAT051_ALERT_1_G | Mu(calc) and Mu(CIF) Ratio Differs from 1.0 by .                                   |  | 2.72   | %      |
| PLAT069_ALERT_1_G | Atom Label Without Numerical Part .....                                            |  | A1     | Do !   |
| PLAT083_ALERT_2_G | SHELXL Second Parameter in WGHT Unusually Large                                    |  | 29.55  | Why ?  |
| PLAT172_ALERT_4_G | The CIF-Embedded .res File Contains DFIX Records                                   |  | 10     | Report |
| PLAT177_ALERT_4_G | The CIF-Embedded .res File Contains DELU Records                                   |  | 3      | Report |
| PLAT178_ALERT_4_G | The CIF-Embedded .res File Contains SIMU Records                                   |  | 3      | Report |
| PLAT186_ALERT_4_G | The CIF-Embedded .res File Contains ISOR Records                                   |  | 2      | Report |
| PLAT188_ALERT_3_G | A Non-default SIMU Restraint Value has been used                                   |  | 0.0100 | Report |
| PLAT188_ALERT_3_G | A Non-default SIMU Restraint Value has been used                                   |  | 0.0100 | Report |
| PLAT188_ALERT_3_G | A Non-default SIMU Restraint Value has been used                                   |  | 0.0010 | Report |
| PLAT192_ALERT_3_G | A Non-default DELU Restraint Value for SecondPar                                   |  | 0.0200 | Report |
| PLAT192_ALERT_3_G | A Non-default DELU Restraint Value for SecondPar                                   |  | 0.0200 | Report |
| PLAT192_ALERT_3_G | A Non-default DELU Restraint Value for FirstPar                                    |  | 0.0010 | Report |
| PLAT192_ALERT_3_G | A Non-default DELU Restraint Value for SecondPar                                   |  | 0.0020 | Report |
| PLAT299_ALERT_4_G | Atom Site Occupancy Constrained at .....                                           |  | 0.5    | Check  |
|                   | C6 C7 C55 C56 H5BA H5BB H5A H6A                                                    |  |        |        |
|                   | H6B H6C H7A H7B H7C H54A H54B H54C                                                 |  |        |        |

|                   | H54D                                             | H55A | H55B | H55C                            | H56A | H56B             | H56C |       |        |
|-------------------|--------------------------------------------------|------|------|---------------------------------|------|------------------|------|-------|--------|
| PLAT300_ALERT_4_G | Atom Site Occupancy                              |      |      | of O65                          |      | Constrained at   |      | 0.75  | Check  |
| PLAT300_ALERT_4_G | Atom Site Occupancy                              |      |      | of C30                          |      | Constrained at   |      | 0.75  | Check  |
| PLAT300_ALERT_4_G | Atom Site Occupancy                              |      |      | of C57                          |      | Constrained at   |      | 0.75  | Check  |
| PLAT300_ALERT_4_G | Atom Site Occupancy                              |      |      | of C58                          |      | Constrained at   |      | 0.75  | Check  |
| PLAT300_ALERT_4_G | Atom Site Occupancy                              |      |      | of C59                          |      | Constrained at   |      | 0.75  | Check  |
| PLAT300_ALERT_4_G | Atom Site Occupancy                              |      |      | of C60                          |      | Constrained at   |      | 0.75  | Check  |
| PLAT300_ALERT_4_G | Atom Site Occupancy                              |      |      | of C61                          |      | Constrained at   |      | 0.75  | Check  |
| PLAT300_ALERT_4_G | Atom Site Occupancy                              |      |      | of C62                          |      | Constrained at   |      | 0.75  | Check  |
| PLAT300_ALERT_4_G | Atom Site Occupancy                              |      |      | of C63                          |      | Constrained at   |      | 0.75  | Check  |
| PLAT300_ALERT_4_G | Atom Site Occupancy                              |      |      | of C64                          |      | Constrained at   |      | 0.75  | Check  |
| PLAT300_ALERT_4_G | Atom Site Occupancy                              |      |      | of C66                          |      | Constrained at   |      | 0.75  | Check  |
| PLAT300_ALERT_4_G | Atom Site Occupancy                              |      |      | of H30A                         |      | Constrained at   |      | 0.75  | Check  |
| PLAT300_ALERT_4_G | Atom Site Occupancy                              |      |      | of H30B                         |      | Constrained at   |      | 0.75  | Check  |
| PLAT300_ALERT_4_G | Atom Site Occupancy                              |      |      | of H30C                         |      | Constrained at   |      | 0.75  | Check  |
| PLAT300_ALERT_4_G | Atom Site Occupancy                              |      |      | of H57A                         |      | Constrained at   |      | 0.75  | Check  |
| PLAT300_ALERT_4_G | Atom Site Occupancy                              |      |      | of H57B                         |      | Constrained at   |      | 0.75  | Check  |
| PLAT300_ALERT_4_G | Atom Site Occupancy                              |      |      | of H57C                         |      | Constrained at   |      | 0.75  | Check  |
| PLAT300_ALERT_4_G | Atom Site Occupancy                              |      |      | of H59A                         |      | Constrained at   |      | 0.75  | Check  |
| PLAT300_ALERT_4_G | Atom Site Occupancy                              |      |      | of H59B                         |      | Constrained at   |      | 0.75  | Check  |
| PLAT300_ALERT_4_G | Atom Site Occupancy                              |      |      | of H60A                         |      | Constrained at   |      | 0.75  | Check  |
| PLAT300_ALERT_4_G | Atom Site Occupancy                              |      |      | of H60B                         |      | Constrained at   |      | 0.75  | Check  |
| PLAT300_ALERT_4_G | Atom Site Occupancy                              |      |      | of H61                          |      | Constrained at   |      | 0.75  | Check  |
| PLAT300_ALERT_4_G | Atom Site Occupancy                              |      |      | of H62A                         |      | Constrained at   |      | 0.75  | Check  |
| PLAT300_ALERT_4_G | Atom Site Occupancy                              |      |      | of H62B                         |      | Constrained at   |      | 0.75  | Check  |
| PLAT300_ALERT_4_G | Atom Site Occupancy                              |      |      | of H63                          |      | Constrained at   |      | 0.75  | Check  |
| PLAT300_ALERT_4_G | Atom Site Occupancy                              |      |      | of H65                          |      | Constrained at   |      | 0.75  | Check  |
| PLAT300_ALERT_4_G | Atom Site Occupancy                              |      |      | of H66A                         |      | Constrained at   |      | 0.75  | Check  |
| PLAT300_ALERT_4_G | Atom Site Occupancy                              |      |      | of H66B                         |      | Constrained at   |      | 0.75  | Check  |
| PLAT300_ALERT_4_G | Atom Site Occupancy                              |      |      | of H66C                         |      | Constrained at   |      | 0.75  | Check  |
| PLAT301_ALERT_3_G | Main Residue Disorder                            |      |      | ..... (Resd                     | 1)   |                  |      | 2%    | Note   |
| PLAT302_ALERT_4_G | Anion/Solvent/Minor-Residue Disorder             |      |      | (Resd                           | 2)   |                  |      | 100%  | Note   |
| PLAT304_ALERT_4_G | Non-Integer Number of Atoms in                   |      |      | ..... (Resd                     | 2)   |                  |      | 21.75 | Check  |
| PLAT343_ALERT_2_G | Unusual sp3                                      |      |      | Angle Range in Main Residue for |      |                  |      | C27   | Check  |
| PLAT367_ALERT_2_G | Long? C(sp?)–C(sp?) Bond                         |      |      | C4                              |      | – C5             | .    | 1.51  | Ang.   |
| PLAT410_ALERT_2_G | Short Intra H...H Contact                        |      |      | H53A                            |      | ..H54B           | .    | 2.05  | Ang.   |
|                   |                                                  |      |      |                                 |      | x,y,z =          |      | 1_555 | Check  |
| PLAT410_ALERT_2_G | Short Intra H...H Contact                        |      |      | H53B                            |      | ..H54A           | .    | 2.05  | Ang.   |
|                   |                                                  |      |      |                                 |      | x,y,z =          |      | 1_555 | Check  |
| PLAT412_ALERT_2_G | Short Intra XH3 .. XHn                           |      |      | H51B                            |      | ..H56B           | .    | 2.03  | Ang.   |
|                   |                                                  |      |      |                                 |      | x,y,z =          |      | 1_555 | Check  |
| PLAT413_ALERT_2_G | Short Inter XH3 .. XHn                           |      |      | H1C                             |      | ..H6B            | .    | 1.82  | Ang.   |
|                   |                                                  |      |      |                                 |      | 1/2+y,1-x,1-z =  |      | 7_666 | Check  |
| PLAT413_ALERT_2_G | Short Inter XH3 .. XHn                           |      |      | H29A                            |      | ..H56C           | .    | 1.87  | Ang.   |
|                   |                                                  |      |      |                                 |      | -1/2+y,1-x,1-z = |      | 7_566 | Check  |
| PLAT415_ALERT_2_G | Short Inter D–H...H–X                            |      |      | H26A                            |      | ..H65            | .    | 1.87  | Ang.   |
|                   |                                                  |      |      |                                 |      | -1/2+y,1-x,1-z = |      | 7_566 | Check  |
| PLAT432_ALERT_2_G | Short Inter X...Y Contact                        |      |      | O65                             |      | ..C26            | .    | 3.00  | Ang.   |
|                   |                                                  |      |      |                                 |      | 1-y,1/2+x,1-z =  |      | 8_666 | Check  |
| PLAT605_ALERT_4_G | Largest Solvent Accessible VOID in the Structure |      |      |                                 |      |                  |      | 98    | A**3   |
| PLAT720_ALERT_4_G | Number of Unusual/Non-Standard Labels            |      |      | .....                           |      |                  |      | 3     | Note   |
|                   | A100                                             | H5BA | H5BB |                                 |      |                  |      |       |        |
| PLAT793_ALERT_4_G | Model has Chirality at C61                       |      |      |                                 |      | (Centro SpGr)    |      | S     | Verify |
| PLAT794_ALERT_5_G | Tentative Bond Valency for Pb1                   |      |      |                                 |      | (II)             | .    | 2.09  | Info   |
| PLAT794_ALERT_5_G | Tentative Bond Valency for Pb3                   |      |      |                                 |      | (II)             | .    | 2.03  | Info   |
| PLAT794_ALERT_5_G | Tentative Bond Valency for Al00                  |      |      |                                 |      | (III)            | .    | 2.74  | Info   |
| PLAT794_ALERT_5_G | Tentative Bond Valency for Al2                   |      |      |                                 |      | (III)            | .    | 2.81  | Info   |

|                   |                                                            |       |   |         |             |
|-------------------|------------------------------------------------------------|-------|---|---------|-------------|
| PLAT794_ALERT_5_G | Tentative Bond Valency for Al3                             | (III) | . | 2.82    | Info        |
| PLAT794_ALERT_5_G | Tentative Bond Valency for Al4                             | (III) | . | 2.75    | Info        |
| PLAT794_ALERT_5_G | Tentative Bond Valency for Al5                             | (III) | . | 2.80    | Info        |
| PLAT794_ALERT_5_G | Tentative Bond Valency for Al6                             | (III) | . | 2.82    | Info        |
| PLAT802_ALERT_4_G | CIF Input Record(s) with more than 80 Characters           |       |   | 6       | Info        |
| PLAT860_ALERT_3_G | Number of Least-Squares Restraints .....                   |       |   | 469     | Note        |
| PLAT868_ALERT_4_G | ALERTS Due to the Use of _smtbx_masks Suppressed           |       |   | !       | Info        |
| PLAT883_ALERT_1_G | No Info/Value for _atom_sites_solution_primary             |       |   |         | Please Do ! |
| PLAT909_ALERT_3_G | Percentage of I>2sig(I) Data at Theta(Max) Still           |       |   | 67%     | Note        |
| PLAT910_ALERT_3_G | Missing # of FCF Reflection(s) Below Theta(Min).           |       |   | 3       | Note        |
|                   | 1 1 0, 0 0 1, 0 1 1,                                       |       |   |         |             |
| PLAT913_ALERT_3_G | Missing # of Very Strong Reflections in FCF ....           |       |   | 1       | Note        |
|                   | 1 1 0,                                                     |       |   |         |             |
| PLAT933_ALERT_2_G | Number of HKL-OMIT Records in Embedded .res File           |       |   | 53      | Note        |
|                   | 3 6 1, 2 2 0, 2 6 4, 8 10 7, 1 9 2, 7 13 2,                |       |   |         |             |
|                   | 2 6 6, 3 3 4, 2 5 3, 0 6 3, -4 12 4, 4 7 2,                |       |   |         |             |
|                   | 2 9 1, 4 7 3, 4 4 4, 1 9 6, 0 2 1, -5 7 2,                 |       |   |         |             |
|                   | -4 5 5, 0 3 4, -2 12 4, 10 13 1, 3 14 3, -1 4 2,           |       |   |         |             |
|                   | 3 4 2, 3 6 2, 3 5 2, 0 10 7, -2 3 2, 5 7 3,                |       |   |         |             |
|                   | 7 11 2, 11 15 6, -1 6 4, -4 7 5, 3 5 6, 5 6 6,             |       |   |         |             |
|                   | -2 12 3, 4 8 7, -7 9 6, 1 3 0, 1 5 2, 1 5 0,               |       |   |         |             |
|                   | 3 3 0, 1 2 1, 0 2 2, 1 3 2, 0 5 1, 0 6 0,                  |       |   |         |             |
|                   | 0 3 1, -7 10 1,                                            |       |   |         |             |
| PLAT941_ALERT_3_G | Average HKL Measurement Multiplicity .....                 |       |   | 3.3     | Low         |
| PLAT951_ALERT_5_G | Calculated (ThMax) and CIF-Reported Kmax Differ            |       |   | 2       | Units       |
| PLAT969_ALERT_5_G | The 'Henn et al.' R-Factor-gap value .....                 |       |   | 3.597   | Note        |
|                   | Predicted wR2: Based on SigI**2 3.78 or SHELX Weight 13.28 |       |   |         |             |
| PLAT978_ALERT_2_G | Number C-C Bonds with Positive Residual Density.           |       |   | 0       | Info        |
| PLAT984_ALERT_1_G | The C-f' = 0.0147 Deviates from the B&C-Value              |       |   | 0.0137  | Check       |
| PLAT984_ALERT_1_G | The N-f' = 0.0253 Deviates from the B&C-Value              |       |   | 0.0241  | Check       |
| PLAT984_ALERT_1_G | The O-f' = 0.0412 Deviates from the B&C-Value              |       |   | 0.0389  | Check       |
| PLAT984_ALERT_1_G | The Pb-f' = -4.2646 Deviates from the B&C-Value            |       |   | -4.4950 | Check       |
| PLAT985_ALERT_1_G | The Al-f" = 0.1843 Deviates from the B&C-Value             |       |   | 0.1873  | Check       |
| PLAT985_ALERT_1_G | The Pb-f" = 7.1982 Deviates from the B&C-Value             |       |   | 6.8412  | Check       |
| PLAT985_ALERT_1_G | The S-f" = 0.4242 Deviates from the B&C-Value              |       |   | 0.4295  | Check       |

---

0 **ALERT level A** = Most likely a serious problem - resolve or explain  
3 **ALERT level B** = A potentially serious problem, consider carefully  
25 **ALERT level C** = Check. Ensure it is not caused by an omission or oversight  
90 **ALERT level G** = General information/check it is not something unexpected

12 ALERT type 1 CIF construction/syntax error, inconsistent or missing data  
36 ALERT type 2 Indicator that the structure model may be wrong or deficient  
18 ALERT type 3 Indicator that the structure quality may be low  
41 ALERT type 4 Improvement, methodology, query or suggestion  
11 ALERT type 5 Informative message, check

---

## checkCIF publication errors

---

### Alert level A

PUBL004\_ALERT\_1\_A The contact author's name and address are missing,  
\_publ\_contact\_author\_name and \_publ\_contact\_author\_address.

PUBL005\_ALERT\_1\_A \_publ\_contact\_author\_email, \_publ\_contact\_author\_fax and  
\_publ\_contact\_author\_phone are all missing.

At least one of these should be present.

PUBL006\_ALERT\_1\_A \_publ\_requested\_journal is missing

e.g. 'Acta Crystallographica Section C'

PUBL008\_ALERT\_1\_A \_publ\_section\_title is missing. Title of paper.

PUBL009\_ALERT\_1\_A \_publ\_author\_name is missing. List of author(s) name(s).

PUBL010\_ALERT\_1\_A \_publ\_author\_address is missing. Author(s) address(es).

PUBL012\_ALERT\_1\_A \_publ\_section\_abstract is missing.

Abstract of paper in English.

---

7 **ALERT level A** = Data missing that is essential or data in wrong format

0 **ALERT level G** = General alerts. Data that may be required is missing

---

## Publication of your CIF

You should attempt to resolve as many as possible of the alerts in all categories. Often the minor alerts point to easily fixed oversights, errors and omissions in your CIF or refinement strategy, so attention to these fine details can be worthwhile. In order to resolve some of the more serious problems it may be necessary to carry out additional measurements or structure refinements. However, the nature of your study may justify the reported deviations from journal submission requirements and the more serious of these should be commented upon in the discussion or experimental section of a paper or in the "special\_details" fields of the CIF. *checkCIF* was carefully designed to identify outliers and unusual parameters, but every test has its limitations and alerts that are not important in a particular case may appear. Conversely, the absence of alerts does not guarantee there are no aspects of the results needing attention. It is up to the individual to critically assess their own results and, if necessary, seek expert advice.

If level A alerts remain, which you believe to be justified deviations, and you intend to submit this CIF for publication in a journal, you should additionally insert an explanation in your CIF using the Validation Reply Form (VRF) below. This will allow your explanation to be considered as part of the review process.

## Validation response form

Please find below a validation response form (VRF) that can be filled in and pasted into your CIF.

```
# start Validation Reply Form
_vrf_PUBL004_GLOBAL
;
PROBLEM: The contact author's name and address are missing,
RESPONSE: ...
;
_vrf_PUBL005_GLOBAL
;
PROBLEM: _publ_contact_author_email, _publ_contact_author_fax and
RESPONSE: ...
;
_vrf_PUBL006_GLOBAL
;
```



```
PROBLEM: _publ_requested_journal is missing
RESPONSE: ...
;
_vrf_PUBL008_GLOBAL
;
PROBLEM: _publ_section_title is missing. Title of paper.
RESPONSE: ...
;
_vrf_PUBL009_GLOBAL
;
PROBLEM: _publ_author_name is missing. List of author(s) name(s).
RESPONSE: ...
;
_vrf_PUBL010_GLOBAL
;
PROBLEM: _publ_author_address is missing. Author(s) address(es).
RESPONSE: ...
;
_vrf_PUBL012_GLOBAL
;
PROBLEM: _publ_section_abstract is missing.
RESPONSE: ...
;
# end Validation Reply Form
```

If you wish to submit your CIF for publication in Acta Crystallographica Section C or E, you should upload your CIF via the web. If you wish to submit your CIF for publication in IUCrData you should upload your CIF via the web. If your CIF is to form part of a submission to another IUCr journal, you will be asked, either during electronic submission or by the Co-editor handling your paper, to upload your CIF via our web site.

---

**PLATON version of 15/07/2024; check.def file version of 15/07/2024**

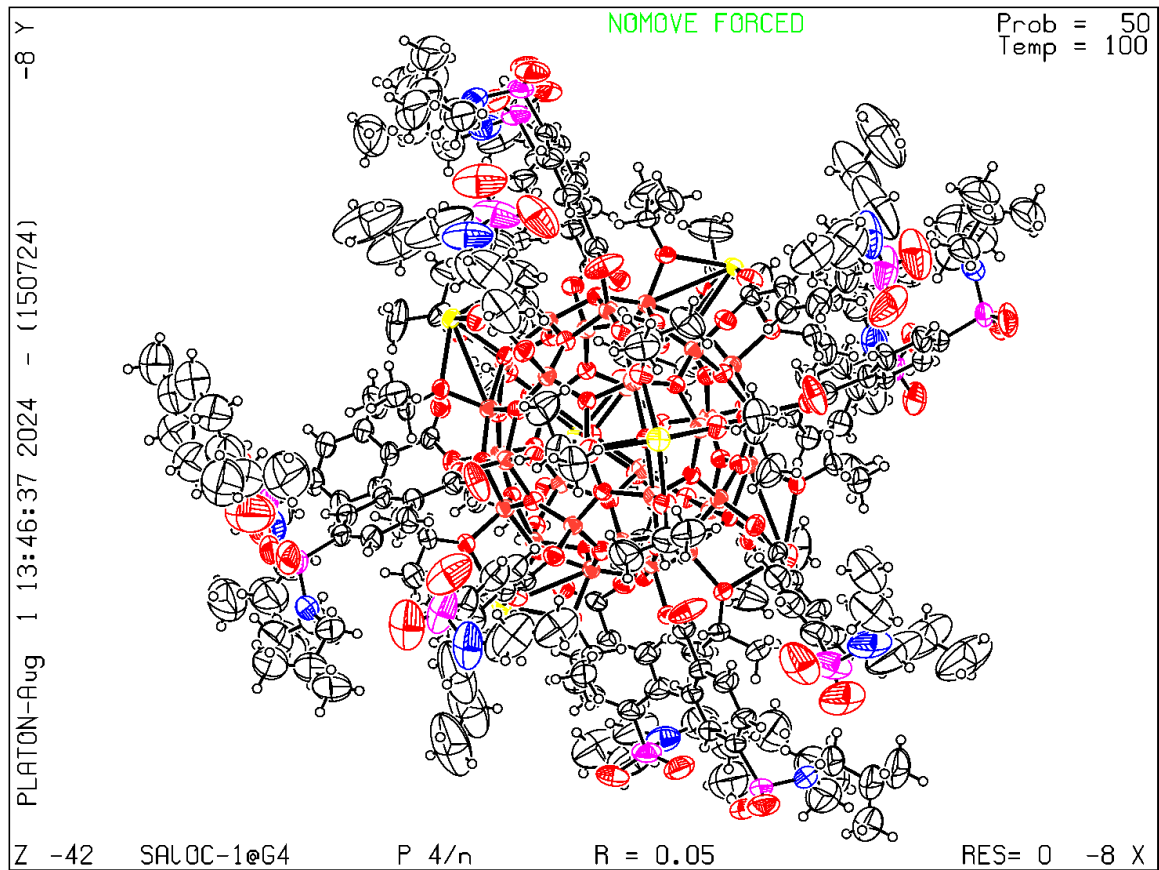

Supplement: Supplementary file 10 [file 6eb9059cd4d583bbcc10580c.pdf]
