# Supplementary material for: Precise Nanochemistry of Spherical Aluminum Oxo Clusters for Accurate Surface Guest Recognition and Release
Source: Research Square preprint supplement (doi:10.21203/rs.3.rs-4948547/v1), 2024-11-06

## checkCIF/PLATON report

Structure factors have been supplied for datablock(s) Al12Pb2

THIS REPORT IS FOR GUIDANCE ONLY. IF USED AS PART OF A REVIEW PROCEDURE FOR PUBLICATION, IT SHOULD NOT REPLACE THE EXPERTISE OF AN EXPERIENCED CRYSTALLOGRAPHIC REFEREE.

No syntax errors found.      CIF dictionary      Interpreting this report

### Datablock: Al12Pb2

---

Bond precision:      C-C = 0.0210 Å      Wavelength=1.34050

Cell:                      a=33.9551(3)      b=12.1005(1)      c=24.8428(3)  
                                    alpha=90      beta=93.234(1)      gamma=90

Temperature:              100 K

|                        | Calculated            | Reported              |
|------------------------|-----------------------|-----------------------|
| Volume                 | 10191.00(17)          | 10191.00(17)          |
| Space group            | C 2/c                 | C 1 2/c 1             |
| Hall group             | -C 2yc                | -C 2yc                |
| Moiety formula         | C66 H154 Al12 O32 Pb2 | C66 H154 Al12 O32 Pb2 |
| Sum formula            | C66 H154 Al12 O32 Pb2 | C66 H154 Al12 O32 Pb2 |
| Mr                     | 2198.06               | 2198.02               |
| Dx, g cm <sup>-3</sup> | 1.433                 | 1.433                 |
| Z                      | 4                     | 4                     |
| Mu (mm <sup>-1</sup> ) | 5.283                 | 5.455                 |
| F000                   | 4504.0                | 4504.0                |
| F000'                  | 4484.63               |                       |
| h, k, lmax             | 39, 14, 29            | 39, 14, 29            |
| Nref                   | 8702                  | 8698                  |
| Tmin, Tmax             |                       | 1.000, 1.000          |
| Tmin'                  |                       |                       |

Correction method= # Reported T Limits: Tmin=1.000 Tmax=1.000  
AbsCorr = SPHERE

Data completeness= 1.000      Theta(max)= 52.048

R(reflections)= 0.1005( 8280)

wR2(reflections)=  
0.2477( 8698)

S = 1.048

Npar= 527

---

The following ALERTS were generated. Each ALERT has the format  
**test-name\_ALERT\_alert-type\_alert-level.**  
Click on the hyperlinks for more details of the test.

---

 **Alert level A**

PLAT971\_ALERT\_2\_A Check Calcd Resid. Dens. 0.87Ang From Pbl 11.57 eA-3

**Author Response:** These alerts are generated because of residual density peaks near the heaviest atoms in the structure, due to fourier termination ripples. After inspection, the residual electron density peak does not make chemical sense and will not affect the correct identification of the structure.

PLAT972\_ALERT\_2\_A Check Calcd Resid. Dens. 0.75Ang From Pbl -4.89 eA-3

**Author Response:** These alerts are generated because of residual density peaks near the heaviest atoms in the structure, due to fourier termination ripples. After inspection, the residual electron density peak does not make chemical sense and will not affect the correct identification of the structure.

---

 **Alert level B**

PLAT097\_ALERT\_2\_B Large Reported Max. (Positive) Residual Density 9.84 eA-3

**Author Response:** These alerts are generated because of residual density peaks near the heaviest atoms in the structure, due to fourier termination ripples. After inspection, the residual electron density peak does not make chemical sense and will not affect the correct identification of the structure.

PLAT342\_ALERT\_3\_B Low Bond Precision on C-C Bonds ..... 0.021 Ang.

**Author Response:** These alerts are generated because of a slight unresolved disorder and the quality of this crystal was not good enough.

PLAT971\_ALERT\_2\_B Check Calcd Resid. Dens. 0.21Ang From Pbl 2.71 eA-3

**Author Response:** These alerts are generated because of residual density peaks near the heaviest atoms in the structure, due to fourier termination ripples. After inspection, the residual electron density peak does not make chemical sense and will not affect the correct identification of the structure.

---

 **Alert level C**

DIFMX02\_ALERT\_1\_C The maximum difference density is > 0.1\*ZMAX\*0.75

The relevant atom site should be identified.

RADNW01\_ALERT\_1\_C The radiation wavelength lies outside the expected range  
for the supplied radiation type. Expected range 1.34130-1.34150  
Wavelength given = 1.34050

THETM01\_ALERT\_3\_C The value of sine(theta\_max)/wavelength is less than 0.590  
Calculated sin(theta\_max)/wavelength = 0.5882

PLAT051\_ALERT\_1\_C Mu(calc) and Mu(CIF) Ratio Differs from 1.0 by . 3.15 %

PLAT094\_ALERT\_2\_C Ratio of Maximum / Minimum Residual Density .... 2.34 Report

PLAT213\_ALERT\_2\_C Atom O9 has ADP max/min Ratio ..... 3.2 prolat

PLAT213\_ALERT\_2\_C Atom C5 has ADP max/min Ratio ..... 3.5 prolat

PLAT213\_ALERT\_2\_C Atom C8 has ADP max/min Ratio ..... 3.7 prolat

PLAT220\_ALERT\_2\_C NonSolvent Resd 1 C Ueq(max)/Ueq(min) Range 4.0 Ratio

PLAT220\_ALERT\_2\_C NonSolvent Resd 1 O Ueq(max)/Ueq(min) Range 3.6 Ratio

PLAT222\_ALERT\_3\_C NonSolvent Resd 1 H Uiso(max)/Uiso(min) Range 7.9 Ratio

PLAT234\_ALERT\_4\_C Large Hirshfeld Difference O3 --C5 . 0.18 Ang.

PLAT234\_ALERT\_4\_C Large Hirshfeld Difference O14 --C26 . 0.18 Ang.

PLAT241\_ALERT\_2\_C High 'MainMol' Ueq as Compared to Neighbors of C5 Check

PLAT242\_ALERT\_2\_C Low 'MainMol' Ueq as Compared to Neighbors of A14 Check

PLAT242\_ALERT\_2\_C Low 'MainMol' Ueq as Compared to Neighbors of O3 Check

PLAT242\_ALERT\_2\_C Low 'MainMol' Ueq as Compared to Neighbors of O6 Check

PLAT906\_ALERT\_3\_C Large K Value in the Analysis of Variance ..... 4.835 Check

PLAT911\_ALERT\_3\_C Missing FCF Refl Between Thmin & STh/L= 0.588 4 Report  
-6 4 3, -4 2 4, -5 1 6, -27 1 14,

PLAT925\_ALERT\_1\_C The Reported and Calculated Rho(max) Differ by . 1.73 eA-3

PLAT971\_ALERT\_2\_C Check Calcd Resid. Dens. 1.64Ang From C8 2.37 eA-3

**Author Response: These alerts are generated because of residual density peaks near the heaviest atoms in the structure, due to fourier termination ripples. After inspection, the residual electron density peak does not make chemical sense and will not affect the correct identification of the structure.**

PLAT971\_ALERT\_2\_C Check Calcd Resid. Dens. 1.24Ang From O12 1.95 eA-3

**Author Response: These alerts are generated because of residual density peaks near the heaviest atoms in the structure, due to fourier termination ripples. After inspection, the residual electron density peak does not make chemical sense and will not affect the correct identification of the structure.**

PLAT971\_ALERT\_2\_C Check Calcd Resid. Dens. 1.01Ang From A14 1.75 eA-3

**Author Response: These alerts are generated because of residual density peaks near the heaviest atoms in the structure, due to fourier termination ripples. After inspection, the residual electron density peak does not make chemical sense and will not affect the correct identification of the structure.**

PLAT971\_ALERT\_2\_C Check Calcd Resid. Dens. 1.00Ang From C6 1.55 eA-3

**Author Response:** These alerts are generated because of residual density peaks near the heaviest atoms in the structure, due to fourier termination ripples. After inspection, the residual electron density peak does not make chemical sense and will not affect the correct identification of the structure.

PLAT972\_ALERT\_2\_C Check Calcd Resid. Dens. 0.57Ang From Pb1 -1.98 eA-3

**Author Response:** These alerts are generated because of residual density peaks near the heaviest atoms in the structure, due to fourier termination ripples. After inspection, the residual electron density peak does not make chemical sense and will not affect the correct identification of the structure.

PLAT972\_ALERT\_2\_C Check Calcd Resid. Dens. 0.59Ang From Pb1 -1.98 eA-3

**Author Response:** These alerts are generated because of residual density peaks near the heaviest atoms in the structure, due to fourier termination ripples. After inspection, the residual electron density peak does not make chemical sense and will not affect the correct identification of the structure.

PLAT972\_ALERT\_2\_C Check Calcd Resid. Dens. 1.53Ang From Pb1 -1.84 eA-3

**Author Response:** These alerts are generated because of residual density peaks near the heaviest atoms in the structure, due to fourier termination ripples. After inspection, the residual electron density peak does not make chemical sense and will not affect the correct identification of the structure.

PLAT972\_ALERT\_2\_C Check Calcd Resid. Dens. 1.53Ang From Pb1 -1.70 eA-3

**Author Response:** These alerts are generated because of residual density peaks near the heaviest atoms in the structure, due to fourier termination ripples. After inspection, the residual electron density peak does not make chemical sense and will not affect the correct identification of the structure.

PLAT976\_ALERT\_2\_C Check Calcd Resid. Dens. 1.08Ang From O4 . -0.74 eA-3  
PLAT977\_ALERT\_2\_C Check Negative Difference Density on H7C . -0.42 eA-3

---

**Alert level G**

ABSMU01\_ALERT\_1\_G Calculation of \_exptl\_absorpt\_correction\_mu  
not performed for this radiation type.  
PLAT002\_ALERT\_2\_G Number of Distance or Angle Restraints on AtSite 33 Note  
PLAT003\_ALERT\_2\_G Number of Uiso or U(i,j) Restrained non-H Atoms 33 Report  
PLAT007\_ALERT\_5\_G Number of Unrefined Donor-H Atoms ..... 1 Report  
H2  
PLAT083\_ALERT\_2\_G SHELXL Second Parameter in WGHT Unusually Large 506.72 Why ?  
PLAT142\_ALERT\_4\_G s.u. on b - Axis Small or Missing ..... 0.00010 Ang.  
PLAT172\_ALERT\_4\_G The CIF-Embedded .res File Contains DFIX Records 2 Report

|                   |                                                            |         |        |
|-------------------|------------------------------------------------------------|---------|--------|
| PLAT177_ALERT_4_G | The CIF-Embedded .res File Contains DELU Records           | 1       | Report |
| PLAT178_ALERT_4_G | The CIF-Embedded .res File Contains SIMU Records           | 1       | Report |
| PLAT187_ALERT_4_G | The CIF-Embedded .res File Contains RIGU Records           | 1       | Report |
| PLAT188_ALERT_3_G | A Non-default SIMU Restraint Value has been used           | 0.0100  | Report |
| PLAT190_ALERT_3_G | A Non-default RIGU Restraint Value for First Par           | 0.0100  | Report |
| PLAT190_ALERT_3_G | A Non-default RIGU Restraint Value for SecondPar           | 0.0200  | Report |
| PLAT192_ALERT_3_G | A Non-default DELU Restraint Value for SecondPar           | 0.0200  | Report |
| PLAT794_ALERT_5_G | Tentative Bond Valency for Al3 (III) .                     | 2.75    | Info   |
| PLAT794_ALERT_5_G | Tentative Bond Valency for Al4 (III) .                     | 2.94    | Info   |
| PLAT794_ALERT_5_G | Tentative Bond Valency for Al6 (III) .                     | 2.88    | Info   |
| PLAT795_ALERT_4_G | C-Atom in CIF Coordinate List Out-of-Sequence ..           | C17     | Note   |
| PLAT796_ALERT_4_G | O-Atom in CIF Coordinate List Out-of-Sequence ..           | O5      | Note   |
| PLAT860_ALERT_3_G | Number of Least-Squares Restraints .....                   | 287     | Note   |
| PLAT909_ALERT_3_G | Percentage of I>2sig(I) Data at Theta(Max) Still           | 87%     | Note   |
| PLAT933_ALERT_2_G | Number of HKL-OMIT Records in Embedded .res File           | 4       | Note   |
|                   | -4 2 4, -5 1 6, -27 1 14, -6 4 3,                          |         |        |
| PLAT969_ALERT_5_G | The 'Henn et al.' R-Factor-gap value .....                 | 6.315   | Note   |
|                   | Predicted wR2: Based on SigI**2 3.92 or SHELX Weight 23.64 |         |        |
| PLAT978_ALERT_2_G | Number C-C Bonds with Positive Residual Density.           | 0       | Info   |
| PLAT984_ALERT_1_G | The C-f' = 0.0147 Deviates from the B&C-Value              | 0.0137  | Check  |
| PLAT984_ALERT_1_G | The O-f' = 0.0412 Deviates from the B&C-Value              | 0.0389  | Check  |
| PLAT984_ALERT_1_G | The Pb-f' = -4.2646 Deviates from the B&C-Value            | -4.4950 | Check  |
| PLAT985_ALERT_1_G | The Al-f" = 0.1843 Deviates from the B&C-Value             | 0.1873  | Check  |
| PLAT985_ALERT_1_G | The Pb-f" = 7.1982 Deviates from the B&C-Value             | 6.8412  | Check  |

---

2 **ALERT level A** = Most likely a serious problem - resolve or explain  
3 **ALERT level B** = A potentially serious problem, consider carefully  
30 **ALERT level C** = Check. Ensure it is not caused by an omission or oversight  
29 **ALERT level G** = General information/check it is not something unexpected

10 ALERT type 1 CIF construction/syntax error, inconsistent or missing data  
29 ALERT type 2 Indicator that the structure model may be wrong or deficient  
11 ALERT type 3 Indicator that the structure quality may be low  
9 ALERT type 4 Improvement, methodology, query or suggestion  
5 ALERT type 5 Informative message, check

---

## checkCIF publication errors

---

### Alert level A

PUBL004\_ALERT\_1\_A The contact author's name and address are missing,  
    \_publ\_contact\_author\_name and \_publ\_contact\_author\_address.  
PUBL005\_ALERT\_1\_A \_publ\_contact\_author\_email, \_publ\_contact\_author\_fax and  
    \_publ\_contact\_author\_phone are all missing.  
    At least one of these should be present.  
PUBL006\_ALERT\_1\_A \_publ\_requested\_journal is missing  
    e.g. 'Acta Crystallographica Section C'  
PUBL008\_ALERT\_1\_A \_publ\_section\_title is missing. Title of paper.  
PUBL009\_ALERT\_1\_A \_publ\_author\_name is missing. List of author(s) name(s).  
PUBL010\_ALERT\_1\_A \_publ\_author\_address is missing. Author(s) address(es).

PUBL012\_ALERT\_1\_A \_publ\_section\_abstract is missing.  
Abstract of paper in English.

---

7 **ALERT level A** = Data missing that is essential or data in wrong format  
0 **ALERT level G** = General alerts. Data that may be required is missing

---

## Publication of your CIF

You should attempt to resolve as many as possible of the alerts in all categories. Often the minor alerts point to easily fixed oversights, errors and omissions in your CIF or refinement strategy, so attention to these fine details can be worthwhile. In order to resolve some of the more serious problems it may be necessary to carry out additional measurements or structure refinements. However, the nature of your study may justify the reported deviations from journal submission requirements and the more serious of these should be commented upon in the discussion or experimental section of a paper or in the "special\_details" fields of the CIF. *checkCIF* was carefully designed to identify outliers and unusual parameters, but every test has its limitations and alerts that are not important in a particular case may appear. Conversely, the absence of alerts does not guarantee there are no aspects of the results needing attention. It is up to the individual to critically assess their own results and, if necessary, seek expert advice.

If level A alerts remain, which you believe to be justified deviations, and you intend to submit this CIF for publication in a journal, you should additionally insert an explanation in your CIF using the Validation Reply Form (VRF) below. This will allow your explanation to be considered as part of the review process.

## Validation response form

Please find below a validation response form (VRF) that can be filled in and pasted into your CIF.

```
# start Validation Reply Form
_vrf_PUBL004_GLOBAL
;
PROBLEM: The contact author's name and address are missing,
RESPONSE: ...
;
_vrf_PUBL005_GLOBAL
;
PROBLEM: _publ_contact_author_email, _publ_contact_author_fax and
RESPONSE: ...
;
_vrf_PUBL006_GLOBAL
;
PROBLEM: _publ_requested_journal is missing
RESPONSE: ...
;
_vrf_PUBL008_GLOBAL
;
PROBLEM: _publ_section_title is missing. Title of paper.
RESPONSE: ...
;
```

```
_vrf_PUBL009_GLOBAL
;
PROBLEM: _publ_author_name is missing. List of author(s) name(s).
RESPONSE: ...
;
_vrf_PUBL010_GLOBAL
;
PROBLEM: _publ_author_address is missing. Author(s) address(es).
RESPONSE: ...
;
_vrf_PUBL012_GLOBAL
;
PROBLEM: _publ_section_abstract is missing.
RESPONSE: ...
;
# end Validation Reply Form
```

If you wish to submit your CIF for publication in Acta Crystallographica Section C or E, you should upload your CIF via the web. If you wish to submit your CIF for publication in IUCrData you should upload your CIF via the web. If your CIF is to form part of a submission to another IUCr journal, you will be asked, either during electronic submission or by the Co-editor handling your paper, to upload your CIF via our web site.

---

**PLATON version of 15/07/2024; check.def file version of 15/07/2024**

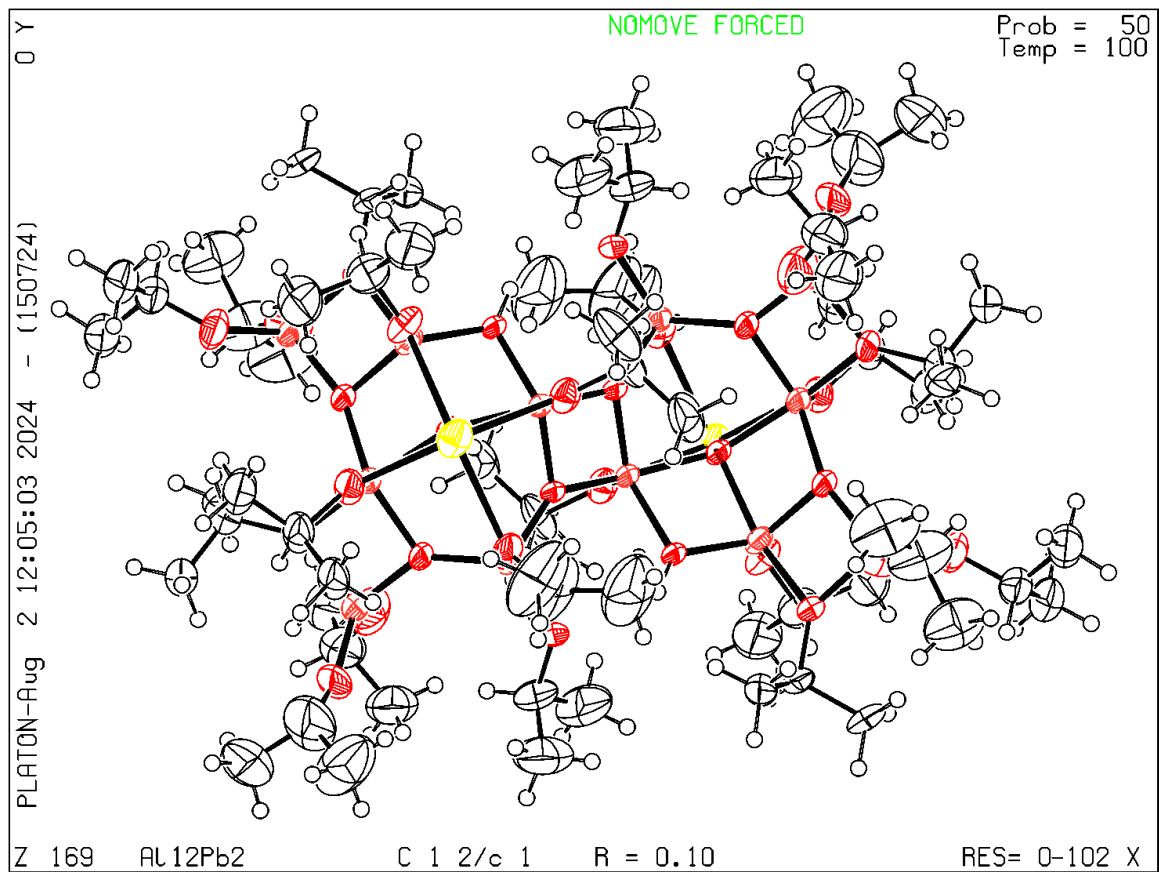

Supplement: Supplementary file 11 [file 6ef3d71fe62cfbe96cc1b363.pdf]
