# Supplementary material for: Precise Nanochemistry of Spherical Aluminum Oxo Clusters for Accurate Surface Guest Recognition and Release
Source: Research Square preprint supplement (doi:10.21203/rs.3.rs-4948547/v1), 2024-11-06

## checkCIF/PLATON report

Structure factors have been supplied for datablock(s) SAIOC-1@G11

THIS REPORT IS FOR GUIDANCE ONLY. IF USED AS PART OF A REVIEW PROCEDURE FOR PUBLICATION, IT SHOULD NOT REPLACE THE EXPERTISE OF AN EXPERIENCED CRYSTALLOGRAPHIC REFEREE.

No syntax errors found.      CIF dictionary      Interpreting this report

### Datablock: SAIOC-1@G11

---

|                        |                                                                |                                                 |                          |
|------------------------|----------------------------------------------------------------|-------------------------------------------------|--------------------------|
| Bond precision:        | C-C = 0.0125 Å                                                 | Wavelength=1.34050                              |                          |
| Cell:                  | a=29.9251(3)<br>alpha=90                                       | b=29.9251(3)<br>beta=90                         | c=19.4257(2)<br>gamma=90 |
| Temperature:           | 100 K                                                          |                                                 |                          |
|                        | Calculated                                                     | Reported                                        |                          |
| Volume                 | 17395.9(4)                                                     | 17395.9(4)                                      |                          |
| Space group            | P 4/n                                                          | P 4/n                                           |                          |
| Hall group             | -P 4a                                                          | -P 4a                                           |                          |
| Moiety formula         | C216 H364 Al32 N12 O110 Pb6<br>S12, 3(C7 H6 N2) [+<br>solvent] | C216 H364 Al32 N12 O110 Pb6<br>S12, 3(C7 H6 N2) |                          |
| Sum formula            | C237 H382 Al32 N18 O110 Pb6<br>S12 [+ solvent]                 | C237 H382 Al32 N18 O110 Pb6<br>S12              |                          |
| Mr                     | 7734.91                                                        | 7734.80                                         |                          |
| Dx, g cm <sup>-3</sup> | 1.477                                                          | 1.477                                           |                          |
| Z                      | 2                                                              | 2                                               |                          |
| Mu (mm <sup>-1</sup> ) | 5.109                                                          | 5.253                                           |                          |
| F000                   | 7820.0                                                         | 7820.0                                          |                          |
| F000'                  | 7799.39                                                        |                                                 |                          |
| h, k, lmax             | 35, 35, 22                                                     | 35, 31, 22                                      |                          |
| Nref                   | 14826                                                          | 14763                                           |                          |
| Tmin, Tmax             |                                                                | 1.000, 1.000                                    |                          |
| Tmin'                  |                                                                |                                                 |                          |
| Correction method=     | # Reported T Limits: Tmin=1.000 Tmax=1.000                     |                                                 |                          |
| AbsCorr =              | SPHERE                                                         |                                                 |                          |
| Data completeness=     | 0.996                                                          | Theta(max)= 52.047                              |                          |

R(reflections)= 0.0675( 11778)

wR2(reflections)=  
0.1908( 14763)

S = 1.024

Npar= 949

---

The following ALERTS were generated. Each ALERT has the format  
**test-name\_ALERT\_alert-type\_alert-level**.  
Click on the hyperlinks for more details of the test.

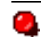

#### Alert level A

PLAT973\_ALERT\_2\_A Check Calcd Positive Resid. Density on Pb1 2.20 eA-3

**Author Response:** These alerts are generated because of residual density peaks near the heaviest atoms in the structure, due to fourier termination ripples. After inspection, the residual electron density peak does not make chemical sense and will not affect the correct identification of the structure.

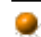

#### Alert level B

PLAT971\_ALERT\_2\_B Check Calcd Resid. Dens. 0.77Ang From Pb2 2.73 eA-3

**Author Response:** These alerts are generated because of residual density peaks near the heaviest atoms in the structure, due to fourier termination ripples. After inspection, the residual electron density peak does not make chemical sense and will not affect the correct identification of the structure.

PLAT971\_ALERT\_2\_B Check Calcd Resid. Dens. 1.00Ang From Pb2 2.69 eA-3

**Author Response:** These alerts are generated because of residual density peaks near the heaviest atoms in the structure, due to fourier termination ripples. After inspection, the residual electron density peak does not make chemical sense and will not affect the correct identification of the structure.

PLAT971\_ALERT\_2\_B Check Calcd Resid. Dens. 0.88Ang From Pb2 2.60 eA-3

**Author Response:** These alerts are generated because of residual density peaks near the heaviest atoms in the structure, due to fourier termination ripples. After inspection, the residual electron density peak does not make chemical sense and will not affect the correct identification of the structure.

PLAT973\_ALERT\_2\_B Check Calcd Positive Resid. Density on Pb3 1.62 eA-3

**Author Response:** These alerts are generated because of residual density peaks near the heaviest atoms in the structure, due to fourier termination ripples. After inspection, the residual electron density peak does not make chemical sense and will not affect the correct identification of the structure.

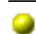

#### Alert level C

```

RADNW01_ALERT_1_C The radiation wavelength lies outside the expected range
                    for the supplied radiation type. Expected range 1.34130-1.34150
                    Wavelength given =      1.34050
THETM01_ALERT_3_C The value of sine(theta_max)/wavelength is less than 0.590
                    Calculated sin(theta_max)/wavelength =      0.5882
PLAT094_ALERT_2_C Ratio of Maximum / Minimum Residual Density ....      2.73 Report
PLAT220_ALERT_2_C NonSolvent   Resd 1   C   Ueq(max)/Ueq(min) Range      3.7 Ratio
PLAT220_ALERT_2_C NonSolvent   Resd 1   O   Ueq(max)/Ueq(min) Range      5.5 Ratio
PLAT222_ALERT_3_C NonSolvent Resd 1   H   Uiso(max)/Uiso(min) Range      5.6 Ratio
PLAT241_ALERT_2_C High   'MainMol' Ueq as Compared to Neighbors of      O17 Check
PLAT241_ALERT_2_C High   'MainMol' Ueq as Compared to Neighbors of      C3 Check
PLAT241_ALERT_2_C High   'MainMol' Ueq as Compared to Neighbors of      C42 Check
PLAT242_ALERT_2_C Low    'MainMol' Ueq as Compared to Neighbors of      S2 Check
PLAT242_ALERT_2_C Low    'MainMol' Ueq as Compared to Neighbors of      N1 Check
PLAT242_ALERT_2_C Low    'MainMol' Ueq as Compared to Neighbors of      N2 Check
PLAT242_ALERT_2_C Low    'MainMol' Ueq as Compared to Neighbors of      C18 Check
PLAT242_ALERT_2_C Low    'MainMol' Ueq as Compared to Neighbors of      C21 Check
PLAT242_ALERT_2_C Low    'MainMol' Ueq as Compared to Neighbors of      C24 Check
PLAT242_ALERT_2_C Low    'MainMol' Ueq as Compared to Neighbors of      C43 Check
PLAT260_ALERT_2_C Large Average Ueq of Residue Including              N4      0.119 Check
PLAT342_ALERT_3_C Low Bond Precision on C-C Bonds .....      0.01246 Ang.
PLAT906_ALERT_3_C Large K Value in the Analysis of Variance .....      3.136 Check
PLAT911_ALERT_3_C Missing FCF Refl Between Thmin & STh/L=      0.588      60 Report
-1  3  0,   1  3  0,   8  8  0,  -4 10  0,   0  2  1,   2  4  1,
-1  6  1,   3  6  1,  -3  7  1,   6  7  1,  -9 11  1,  -6 11  1,
-4 11  1,   6 15  1,  -6 17  1,   0  1  2,   1  1  2,   0  3  2,
 1  3  2,   3  4  2,   2  5  2,   3  5  2,  -5  6  2,  -5  7  2,
-4  7  2,   1  7  2,   0  8  2,   1  9  2,   2 10  2,   5 10  2,
10 10  2,  -4 11  2,   5 11  2,  -5 12  2,  -3  5  3,   2  5  3,
-4  6  3,   2  6  3,  -1  7  3,   1 12  3,  -2  3  4,   4  4  4,
 1  5  4,   3  5  4,   2  7  4,   3  8  4,   2 14  4,  -3  9  5,
-2 10  5,   7 12  5,   0  0  6,  -1  3  6,  -2  4  6,   2  4  6,
 1  8  6,   0  9  6,  -4 12  6,  -1  9  9,   1  3 10,  14 26 10,
PLAT971_ALERT_2_C Check Calcd Resid. Dens.   0.85Ang From Pb1      2.43 eA-3

```

**Author Response:** These alerts are generated because of residual density peaks near the heaviest atoms in the structure, due to fourier termination ripples. After inspection, the residual electron density peak does not make chemical sense and will not affect the correct identification of the structure.

```

PLAT971_ALERT_2_C Check Calcd Resid. Dens.   0.68Ang From Pb1      2.39 eA-3

```

**Author Response:** These alerts are generated because of residual density peaks near the heaviest atoms in the structure, due to fourier termination ripples. After inspection, the residual electron density peak does not make chemical sense and will not affect the correct identification of the structure.

PLAT971\_ALERT\_2\_C Check Calcd Resid. Dens. 1.01Ang From Pb2 2.37 eA-3

**Author Response:** These alerts are generated because of residual density peaks near the heaviest atoms in the structure, due to fourier termination ripples. After inspection, the residual electron density peak does not make chemical sense and will not affect the correct identification of the structure.

PLAT971\_ALERT\_2\_C Check Calcd Resid. Dens. 0.97Ang From Pb3 2.29 eA-3

**Author Response:** These alerts are generated because of residual density peaks near the heaviest atoms in the structure, due to fourier termination ripples. After inspection, the residual electron density peak does not make chemical sense and will not affect the correct identification of the structure.

PLAT971\_ALERT\_2\_C Check Calcd Resid. Dens. 0.82Ang From Pb2 2.21 eA-3

**Author Response:** These alerts are generated because of residual density peaks near the heaviest atoms in the structure, due to fourier termination ripples. After inspection, the residual electron density peak does not make chemical sense and will not affect the correct identification of the structure.

PLAT971\_ALERT\_2\_C Check Calcd Resid. Dens. 0.24Ang From Pb2 1.98 eA-3

**Author Response:** These alerts are generated because of residual density peaks near the heaviest atoms in the structure, due to fourier termination ripples. After inspection, the residual electron density peak does not make chemical sense and will not affect the correct identification of the structure.

PLAT971\_ALERT\_2\_C Check Calcd Resid. Dens. 0.91Ang From Pb3 1.83 eA-3

**Author Response:** These alerts are generated because of residual density peaks near the heaviest atoms in the structure, due to fourier termination ripples. After inspection, the residual electron density peak does not make chemical sense and will not affect the correct identification of the structure.

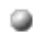

#### **Alert level G**

ABSMU01\_ALERT\_1\_G Calculation of \_exptl\_absorpt\_correction\_mu  
not performed for this radiation type.

|                   |                                                  |                |             |
|-------------------|--------------------------------------------------|----------------|-------------|
| PLAT002_ALERT_2_G | Number of Distance or Angle Restraints on AtSite | 23             | Note        |
| PLAT003_ALERT_2_G | Number of Uiso or U(i,j) Restrained non-H Atoms  | 65             | Report      |
| PLAT007_ALERT_5_G | Number of Unrefined Donor-H Atoms .....          | 3              | Report      |
|                   | H10 H22 H4                                       |                |             |
| PLAT051_ALERT_1_G | Mu(calc) and Mu(CIF) Ratio Differs from 1.0 by . | 2.73           | %           |
| PLAT072_ALERT_2_G | SHELXL First Parameter in WGHT Unusually Large   | 0.12           | Report      |
| PLAT083_ALERT_2_G | SHELXL Second Parameter in WGHT Unusually Large  | 11.31          | Why ?       |
| PLAT172_ALERT_4_G | The CIF-Embedded .res File Contains DFIX Records | 20             | Report      |
| PLAT177_ALERT_4_G | The CIF-Embedded .res File Contains DELU Records | 4              | Report      |
| PLAT178_ALERT_4_G | The CIF-Embedded .res File Contains SIMU Records | 4              | Report      |
| PLAT188_ALERT_3_G | A Non-default SIMU Restraint Value has been used | 0.0100         | Report      |
| PLAT188_ALERT_3_G | A Non-default SIMU Restraint Value has been used | 0.0100         | Report      |
| PLAT188_ALERT_3_G | A Non-default SIMU Restraint Value has been used | 0.0100         | Report      |
| PLAT188_ALERT_3_G | A Non-default SIMU Restraint Value has been used | 0.0100         | Report      |
| PLAT192_ALERT_3_G | A Non-default DELU Restraint Value for SecondPar | 0.0200         | Report      |
| PLAT192_ALERT_3_G | A Non-default DELU Restraint Value for SecondPar | 0.0200         | Report      |
| PLAT192_ALERT_3_G | A Non-default DELU Restraint Value for SecondPar | 0.0200         | Report      |
| PLAT192_ALERT_3_G | A Non-default DELU Restraint Value for SecondPar | 0.0200         | Report      |
| PLAT299_ALERT_4_G | Atom Site Occupancy Constrained at .....         | 0.5            | Check       |
|                   | C39 C40 C55 C56 H39A H39B H39C H40A              |                |             |
|                   | H40B H40C H41A H41B H41C H41D H54A H54B          |                |             |
|                   | H54C H54D H55A H55B H55C H56A H56B H56C          |                |             |
| PLAT300_ALERT_4_G | Atom Site Occupancy of N4                        | Constrained at | 0.75 Check  |
| PLAT300_ALERT_4_G | Atom Site Occupancy of N5                        | Constrained at | 0.75 Check  |
| PLAT300_ALERT_4_G | Atom Site Occupancy of C57                       | Constrained at | 0.75 Check  |
| PLAT300_ALERT_4_G | Atom Site Occupancy of C58                       | Constrained at | 0.75 Check  |
| PLAT300_ALERT_4_G | Atom Site Occupancy of C59                       | Constrained at | 0.75 Check  |
| PLAT300_ALERT_4_G | Atom Site Occupancy of C60                       | Constrained at | 0.75 Check  |
| PLAT300_ALERT_4_G | Atom Site Occupancy of C61                       | Constrained at | 0.75 Check  |
| PLAT300_ALERT_4_G | Atom Site Occupancy of C62                       | Constrained at | 0.75 Check  |
| PLAT300_ALERT_4_G | Atom Site Occupancy of C63                       | Constrained at | 0.75 Check  |
| PLAT300_ALERT_4_G | Atom Site Occupancy of H4                        | Constrained at | 0.75 Check  |
| PLAT300_ALERT_4_G | Atom Site Occupancy of H57                       | Constrained at | 0.75 Check  |
| PLAT300_ALERT_4_G | Atom Site Occupancy of H58                       | Constrained at | 0.75 Check  |
| PLAT300_ALERT_4_G | Atom Site Occupancy of H61                       | Constrained at | 0.75 Check  |
| PLAT300_ALERT_4_G | Atom Site Occupancy of H62                       | Constrained at | 0.75 Check  |
| PLAT300_ALERT_4_G | Atom Site Occupancy of H63                       | Constrained at | 0.75 Check  |
| PLAT301_ALERT_3_G | Main Residue Disorder .....                      | (Resd 1)       | 2% Note     |
| PLAT302_ALERT_4_G | Anion/Solvent/Minor-Residue Disorder (Resd 2)    |                | 100% Note   |
| PLAT304_ALERT_4_G | Non-Integer Number of Atoms in .....             | (Resd 2)       | 11.25 Check |
| PLAT413_ALERT_2_G | Short Inter XH3 .. XHn H6A ..H56C .              |                | 1.95 Ang.   |
|                   | y,1/2-x,-1+z =                                   | 4_554          | Check       |
| PLAT605_ALERT_4_G | Largest Solvent Accessible VOID in the Structure | 152            | A**3        |
| PLAT710_ALERT_4_G | Delete 1-2-3 or 2-3-4 Linear Torsion Angle ... # | 127            | Do !        |
|                   | O14 -AL5 -O12 -AL4 35.80 1.40 1_555 1_555 1_555  | 1_555          |             |
| PLAT710_ALERT_4_G | Delete 1-2-3 or 2-3-4 Linear Torsion Angle ... # | 128            | Do !        |
|                   | O14 -AL5 -O12 -AL8 -67.40 1.20 1_555 1_555 1_555 | 4_555          |             |
| PLAT710_ALERT_4_G | Delete 1-2-3 or 2-3-4 Linear Torsion Angle ... # | 177            | Do !        |
|                   | O12 -AL5 -O14 -PB2 165.30 1.00 1_555 1_555 1_555 | 1_555          |             |
| PLAT710_ALERT_4_G | Delete 1-2-3 or 2-3-4 Linear Torsion Angle ... # | 178            | Do !        |
|                   | O12 -AL5 -O14 -AL3 -88.90 1.10 1_555 1_555 1_555 | 1_555          |             |
| PLAT710_ALERT_4_G | Delete 1-2-3 or 2-3-4 Linear Torsion Angle ... # | 179            | Do !        |
|                   | O12 -AL5 -O14 -AL4 14.60 1.30 1_555 1_555 1_555  | 3_555          |             |
| PLAT764_ALERT_4_G | Overcomplete CIF Bond List Detected (Rep/Expd) . | 1.14           | Ratio       |
| PLAT779_ALERT_4_G | Suspect or Irrelevant (Bond) Angle(s) in CIF ... | 0.00           | Deg.        |
|                   | O23 -O23 -PB3 4_555 1_555 1_555 .....            | # 224          | Check       |
| PLAT779_ALERT_4_G | Suspect or Irrelevant (Bond) Angle(s) in CIF ... | 0.00           | Deg.        |

|                   |         |      |            |        |          |       |         |   |     |           |
|-------------------|---------|------|------------|--------|----------|-------|---------|---|-----|-----------|
|                   | 023     | -023 | -PB3       | 3_555  | 1_555    | 1_555 | .....   | # | 225 | Check     |
| PLAT779_ALERT_4_G | Suspect | or   | Irrelevant | (Bond) | Angle(s) | in    | CIF ... |   |     | 0.00 Deg. |
|                   | 023     | -023 | -PB3       | 2_555  | 1_555    | 1_555 | .....   | # | 226 | Check     |
| PLAT779_ALERT_4_G | Suspect | or   | Irrelevant | (Bond) | Angle(s) | in    | CIF ... |   |     | 0.00 Deg. |
|                   | 023     | -023 | -AL7       | 2_555  | 1_555    | 4_555 | .....   | # | 227 | Check     |
| PLAT779_ALERT_4_G | Suspect | or   | Irrelevant | (Bond) | Angle(s) | in    | CIF ... |   |     | 0.00 Deg. |
|                   | 023     | -023 | -AL7       | 4_555  | 1_555    | 1_555 | .....   | # | 228 | Check     |
| PLAT779_ALERT_4_G | Suspect | or   | Irrelevant | (Bond) | Angle(s) | in    | CIF ... |   |     | 0.00 Deg. |
|                   | 023     | -023 | -AL7       | 2_555  | 1_555    | 3_555 | .....   | # | 229 | Check     |
| PLAT779_ALERT_4_G | Suspect | or   | Irrelevant | (Bond) | Angle(s) | in    | CIF ... |   |     | 0.00 Deg. |
|                   | 023     | -023 | -AL7       | 4_555  | 1_555    | 3_555 | .....   | # | 230 | Check     |
| PLAT779_ALERT_4_G | Suspect | or   | Irrelevant | (Bond) | Angle(s) | in    | CIF ... |   |     | 0.00 Deg. |
|                   | 023     | -023 | -AL7       | 2_555  | 1_555    | 1_555 | .....   | # | 231 | Check     |
| PLAT779_ALERT_4_G | Suspect | or   | Irrelevant | (Bond) | Angle(s) | in    | CIF ... |   |     | 0.00 Deg. |
|                   | 023     | -023 | -AL7       | 4_555  | 1_555    | 2_555 | .....   | # | 232 | Check     |
| PLAT779_ALERT_4_G | Suspect | or   | Irrelevant | (Bond) | Angle(s) | in    | CIF ... |   |     | 0.00 Deg. |
|                   | 023     | -023 | -AL7       | 4_555  | 1_555    | 4_555 | .....   | # | 233 | Check     |
| PLAT779_ALERT_4_G | Suspect | or   | Irrelevant | (Bond) | Angle(s) | in    | CIF ... |   |     | 0.00 Deg. |
|                   | 023     | -023 | -AL7       | 3_555  | 1_555    | 2_555 | .....   | # | 234 | Check     |
| PLAT779_ALERT_4_G | Suspect | or   | Irrelevant | (Bond) | Angle(s) | in    | CIF ... |   |     | 0.00 Deg. |
|                   | 023     | -023 | -AL7       | 3_555  | 1_555    | 1_555 | .....   | # | 235 | Check     |
| PLAT779_ALERT_4_G | Suspect | or   | Irrelevant | (Bond) | Angle(s) | in    | CIF ... |   |     | 0.00 Deg. |
|                   | 023     | -023 | -AL7       | 2_555  | 1_555    | 2_555 | .....   | # | 236 | Check     |
| PLAT779_ALERT_4_G | Suspect | or   | Irrelevant | (Bond) | Angle(s) | in    | CIF ... |   |     | 0.00 Deg. |
|                   | 023     | -023 | -AL7       | 3_555  | 1_555    | 3_555 | .....   | # | 237 | Check     |
| PLAT779_ALERT_4_G | Suspect | or   | Irrelevant | (Bond) | Angle(s) | in    | CIF ... |   |     | 0.00 Deg. |
|                   | 023     | -023 | -AL7       | 3_555  | 1_555    | 4_555 | .....   | # | 238 | Check     |
| PLAT779_ALERT_4_G | Suspect | or   | Irrelevant | (Bond) | Angle(s) | in    | CIF ... |   |     | 0.00 Deg. |
|                   | 023     | -023 | -023       | 3_555  | 1_555    | 2_555 | .....   | # | 239 | Check     |
| PLAT779_ALERT_4_G | Suspect | or   | Irrelevant | (Bond) | Angle(s) | in    | CIF ... |   |     | 0.00 Deg. |
|                   | 023     | -023 | -023       | 4_555  | 1_555    | 2_555 | .....   | # | 240 | Check     |
| PLAT779_ALERT_4_G | Suspect | or   | Irrelevant | (Bond) | Angle(s) | in    | CIF ... |   |     | 0.00 Deg. |
|                   | 023     | -023 | -023       | 4_555  | 1_555    | 3_555 | .....   | # | 241 | Check     |
| PLAT779_ALERT_4_G | Suspect | or   | Irrelevant | (Bond) | Angle(s) | in    | CIF ... |   |     | 0.00 Deg. |
|                   | 06      | -06  | -PB1       | 4_555  | 1_555    | 1_555 | .....   | # | 255 | Check     |
| PLAT779_ALERT_4_G | Suspect | or   | Irrelevant | (Bond) | Angle(s) | in    | CIF ... |   |     | 0.00 Deg. |
|                   | 06      | -06  | -PB1       | 2_555  | 1_555    | 1_555 | .....   | # | 256 | Check     |
| PLAT779_ALERT_4_G | Suspect | or   | Irrelevant | (Bond) | Angle(s) | in    | CIF ... |   |     | 0.00 Deg. |
|                   | 06      | -06  | -PB1       | 3_555  | 1_555    | 1_555 | .....   | # | 257 | Check     |
| PLAT779_ALERT_4_G | Suspect | or   | Irrelevant | (Bond) | Angle(s) | in    | CIF ... |   |     | 0.00 Deg. |
|                   | 06      | -06  | -AL1       | 4_555  | 1_555    | 2_555 | .....   | # | 258 | Check     |
| PLAT779_ALERT_4_G | Suspect | or   | Irrelevant | (Bond) | Angle(s) | in    | CIF ... |   |     | 0.00 Deg. |
|                   | 06      | -06  | -AL1       | 2_555  | 1_555    | 3_555 | .....   | # | 259 | Check     |
| PLAT779_ALERT_4_G | Suspect | or   | Irrelevant | (Bond) | Angle(s) | in    | CIF ... |   |     | 0.00 Deg. |
|                   | 06      | -06  | -AL1       | 4_555  | 1_555    | 3_555 | .....   | # | 260 | Check     |
| PLAT779_ALERT_4_G | Suspect | or   | Irrelevant | (Bond) | Angle(s) | in    | CIF ... |   |     | 0.00 Deg. |
|                   | 06      | -06  | -AL1       | 3_555  | 1_555    |       |         |   |     |           |

|                                                            |                                                  |               |
|------------------------------------------------------------|--------------------------------------------------|---------------|
| PLAT779_ALERT_4_G                                          | Suspect or Irrelevant (Bond) Angle(s) in CIF ... | 0.00 Deg.     |
| 06 -O6 -Al1 2_555 1_555 4_555 .....                        | # 267 Check                                      |               |
| PLAT779_ALERT_4_G                                          | Suspect or Irrelevant (Bond) Angle(s) in CIF ... | 0.00 Deg.     |
| 06 -O6 -Al1 2_555 1_555 1_555 .....                        | # 268 Check                                      |               |
| PLAT779_ALERT_4_G                                          | Suspect or Irrelevant (Bond) Angle(s) in CIF ... | 0.00 Deg.     |
| 06 -O6 -Al1 3_555 1_555 1_555 .....                        | # 269 Check                                      |               |
| PLAT779_ALERT_4_G                                          | Suspect or Irrelevant (Bond) Angle(s) in CIF ... | 0.00 Deg.     |
| 06 -O6 -O6 4_555 1_555 2_555 .....                         | # 270 Check                                      |               |
| PLAT779_ALERT_4_G                                          | Suspect or Irrelevant (Bond) Angle(s) in CIF ... | 0.00 Deg.     |
| 06 -O6 -O6 3_555 1_555 2_555 .....                         | # 271 Check                                      |               |
| PLAT779_ALERT_4_G                                          | Suspect or Irrelevant (Bond) Angle(s) in CIF ... | 0.00 Deg.     |
| 06 -O6 -O6 4_555 1_555 3_555 .....                         | # 272 Check                                      |               |
| PLAT794_ALERT_5_G                                          | Tentative Bond Valency for Pb1 (II) .            | 2.06 Info     |
| PLAT794_ALERT_5_G                                          | Tentative Bond Valency for Pb3 (II) .            | 2.13 Info     |
| PLAT794_ALERT_5_G                                          | Tentative Bond Valency for Al1 (III) .           | 2.78 Info     |
| PLAT794_ALERT_5_G                                          | Tentative Bond Valency for Al2 (III) .           | 2.78 Info     |
| PLAT794_ALERT_5_G                                          | Tentative Bond Valency for Al5 (III) .           | 2.79 Info     |
| PLAT794_ALERT_5_G                                          | Tentative Bond Valency for Al6 (III) .           | 2.81 Info     |
| PLAT794_ALERT_5_G                                          | Tentative Bond Valency for Al7 (III) .           | 2.80 Info     |
| PLAT794_ALERT_5_G                                          | Tentative Bond Valency for Al8 (III) .           | 2.82 Info     |
| PLAT860_ALERT_3_G                                          | Number of Least-Squares Restraints .....         | 455 Note      |
| PLAT868_ALERT_4_G                                          | ALERTS Due to the Use of _smtbx_masks Suppressed | ! Info        |
| PLAT883_ALERT_1_G                                          | No Info/Value for _atom_sites_solution_primary . | Please Do !   |
| PLAT909_ALERT_3_G                                          | Percentage of I>2sig(I) Data at Theta(Max) Still | 61% Note      |
| PLAT910_ALERT_3_G                                          | Missing # of FCF Reflection(s) Below Theta(Min). | 3 Note        |
| 1 1 0, 0 0 1, 0 1 1,                                       |                                                  |               |
| PLAT913_ALERT_3_G                                          | Missing # of Very Strong Reflections in FCF .... | 1 Note        |
| 1 1 0,                                                     |                                                  |               |
| PLAT933_ALERT_2_G                                          | Number of HKL-OMIT Records in Embedded .res File | 57 Note       |
| 0 1 2, -2 3 4, 1 3 0, 2 6 3, 2 7 4, -4 11 2,               |                                                  |               |
| -1 7 3, -4 7 2, 2 10 2, 3 5 4, 1 3 10, 1 3 2,              |                                                  |               |
| -2 10 5, 2 4 6, -5 7 2, -6 17 1, 1 7 2, 3 5 2,             |                                                  |               |
| -4 11 1, 5 11 2, -1 3 6, 3 6 1, -9 11 1, 1 1 2,            |                                                  |               |
| 7 12 5, 1 8 6, 0 0 6, -6 11 1, 0 3 2, 1 9 2,               |                                                  |               |
| 3 4 2, 1 5 4, -4 6 3, 2 14 4, 4 4 4, -3 7 1,               |                                                  |               |
| -4 12 6, 6 7 1, 6 15 1, 3 8 4, -2 4 6, 0 8 2,              |                                                  |               |
| 8 8 0, 2 4 1, -5 12 2, 0 9 6, -3 9 5, -3 5 3,              |                                                  |               |
| 2 5 2, 10 10 2,                                            |                                                  |               |
| PLAT941_ALERT_3_G                                          | Average HKL Measurement Multiplicity .....       | 3.3 Low       |
| PLAT951_ALERT_5_G                                          | Calculated (ThMax) and CIF-Reported Kmax Differ  | 4 Units       |
| PLAT969_ALERT_5_G                                          | The 'Henn et al.' R-Factor-gap value .....       | 2.440 Note    |
| Predicted wR2: Based on SigI**2 7.82 or SHELX Weight 18.63 |                                                  |               |
| PLAT978_ALERT_2_G                                          | Number C-C Bonds with Positive Residual Density. | 0 Info        |
| PLAT984_ALERT_1_G                                          | The C-f' = 0.0147 Deviates from the B&C-Value    | 0.0137 Check  |
| PLAT984_ALERT_1_G                                          | The N-f' = 0.0253 Deviates from the B&C-Value    | 0.0241 Check  |
| PLAT984_ALERT_1_G                                          | The O-f' = 0.0412 Deviates from the B&C-Value    | 0.0389 Check  |
| PLAT984_ALERT_1_G                                          | The Pb-f' = -4.2646 Deviates from the B&C-Value  | -4.4950 Check |
| PLAT985_ALERT_1_G                                          | The Al-f" = 0.1843 Deviates from the B&C-Value   | 0.1873 Check  |
| PLAT985_ALERT_1_G                                          | The Pb-f" = 7.1982 Deviates from the B&C-Value   | 6.8412 Check  |
| PLAT985_ALERT_1_G                                          | The S-f" = 0.4242 Deviates from the B&C-Value    | 0.4295 Check  |

- 
- 1 **ALERT level A** = Most likely a serious problem - resolve or explain  
 4 **ALERT level B** = A potentially serious problem, consider carefully  
 27 **ALERT level C** = Check. Ensure it is not caused by an omission or oversight  
 107 **ALERT level G** = General information/check it is not something unexpected

11 ALERT type 1 CIF construction/syntax error, inconsistent or missing data  
33 ALERT type 2 Indicator that the structure model may be wrong or deficient  
19 ALERT type 3 Indicator that the structure quality may be low  
65 ALERT type 4 Improvement, methodology, query or suggestion  
11 ALERT type 5 Informative message, check

---

## checkCIF publication errors

---

### Alert level A

PUBL004\_ALERT\_1\_A The contact author's name and address are missing,  
\_publ\_contact\_author\_name and \_publ\_contact\_author\_address.  
PUBL005\_ALERT\_1\_A \_publ\_contact\_author\_email, \_publ\_contact\_author\_fax and  
\_publ\_contact\_author\_phone are all missing.  
At least one of these should be present.  
PUBL006\_ALERT\_1\_A \_publ\_requested\_journal is missing  
e.g. 'Acta Crystallographica Section C'  
PUBL008\_ALERT\_1\_A \_publ\_section\_title is missing. Title of paper.  
PUBL009\_ALERT\_1\_A \_publ\_author\_name is missing. List of author(s) name(s).  
PUBL010\_ALERT\_1\_A \_publ\_author\_address is missing. Author(s) address(es).  
PUBL012\_ALERT\_1\_A \_publ\_section\_abstract is missing.  
Abstract of paper in English.

---

7 **ALERT level A** = Data missing that is essential or data in wrong format  
0 **ALERT level G** = General alerts. Data that may be required is missing

---

## Publication of your CIF

You should attempt to resolve as many as possible of the alerts in all categories. Often the minor alerts point to easily fixed oversights, errors and omissions in your CIF or refinement strategy, so attention to these fine details can be worthwhile. In order to resolve some of the more serious problems it may be necessary to carry out additional measurements or structure refinements. However, the nature of your study may justify the reported deviations from journal submission requirements and the more serious of these should be commented upon in the discussion or experimental section of a paper or in the "special\_details" fields of the CIF. *checkCIF* was carefully designed to identify outliers and unusual parameters, but every test has its limitations and alerts that are not important in a particular case may appear. Conversely, the absence of alerts does not guarantee there are no aspects of the results needing attention. It is up to the individual to critically assess their own results and, if necessary, seek expert advice.

If level A alerts remain, which you believe to be justified deviations, and you intend to submit this CIF for publication in a journal, you should additionally insert an explanation in your CIF using the Validation Reply Form (VRF) below. This will allow your explanation to be considered as part of the review process.



## Validation response form

Please find below a validation response form (VRF) that can be filled in and pasted into your CIF.

```
# start Validation Reply Form
_vrf_PUBL004_GLOBAL
;
PROBLEM: The contact author's name and address are missing,
RESPONSE: ...
;
_vrf_PUBL005_GLOBAL
;
PROBLEM: _publ_contact_author_email, _publ_contact_author_fax and
RESPONSE: ...
;
_vrf_PUBL006_GLOBAL
;
PROBLEM: _publ_requested_journal is missing
RESPONSE: ...
;
_vrf_PUBL008_GLOBAL
;
PROBLEM: _publ_section_title is missing. Title of paper.
RESPONSE: ...
;
_vrf_PUBL009_GLOBAL
;
PROBLEM: _publ_author_name is missing. List of author(s) name(s).
RESPONSE: ...
;
_vrf_PUBL010_GLOBAL
;
PROBLEM: _publ_author_address is missing. Author(s) address(es).
RESPONSE: ...
;
_vrf_PUBL012_GLOBAL
;
PROBLEM: _publ_section_abstract is missing.
RESPONSE: ...
;
# end Validation Reply Form
```

If you wish to submit your CIF for publication in Acta Crystallographica Section C or E, you should upload your CIF via the web. If you wish to submit your CIF for publication in IUCrData you should upload your CIF via the web. If your CIF is to form part of a submission to another IUCr journal, you will be asked, either during electronic submission or by the Co-editor handling your paper, to upload your CIF via our web site.

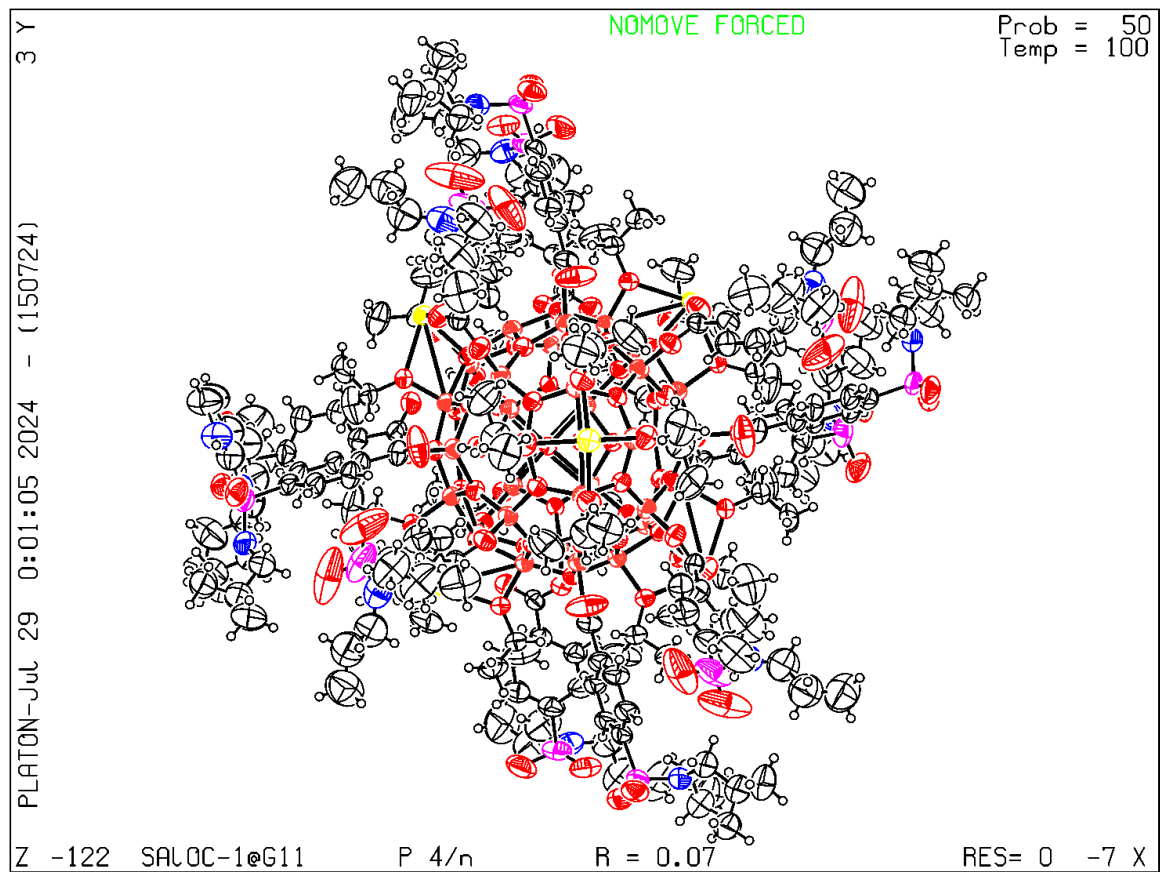

Supplement: Supplementary file 13 [file 8cfa050eb22aedcf14a16752.pdf]
