# Supplementary material for: Precise Nanochemistry of Spherical Aluminum Oxo Clusters for Accurate Surface Guest Recognition and Release
Source: Research Square preprint supplement (doi:10.21203/rs.3.rs-4948547/v1), 2024-11-06

## checkCIF/PLATON report

Structure factors have been supplied for datablock(s) SAIOC-1-recover

THIS REPORT IS FOR GUIDANCE ONLY. IF USED AS PART OF A REVIEW PROCEDURE FOR PUBLICATION, IT SHOULD NOT REPLACE THE EXPERTISE OF AN EXPERIENCED CRYSTALLOGRAPHIC REFEREE.

No syntax errors found.      CIF dictionary      Interpreting this report

### Datablock: SAIOC-1-recover

---

Bond precision:      C-C = 0.0230 A

Wavelength=1.34050

Cell:                      a=29.8435 (5)

b=29.8435 (5)

c=19.3447 (4)

alpha=90

beta=90

gamma=90

Temperature:              100 K

|                        | Calculated                                         | Reported                           |
|------------------------|----------------------------------------------------|------------------------------------|
| Volume                 | 17229.1 (7)                                        | 17229.1 (7)                        |
| Space group            | P 4/n                                              | P 4/n                              |
| Hall group             | -P 4a                                              | -P 4a                              |
| Moiety formula         | C104 H170 Al16 N6 O55 Pb3<br>S6, C4 H9 [+ solvent] | C216 H358 Al32 N12 O110 Pb6<br>S12 |
| Sum formula            | C108 H179 Al16 N6 O55 Pb3<br>S6 [+ solvent]        | C216 H358 Al32 N12 O110 Pb6<br>S12 |
| Mr                     | 3687.22                                            | 7374.34                            |
| Dx, g cm <sup>-3</sup> | 1.421                                              | 1.421                              |
| Z                      | 4                                                  | 2                                  |
| Mu (mm <sup>-1</sup> ) | 5.137                                              | 5.282                              |
| F000                   | 7436.0                                             | 7436.0                             |
| F000'                  | 7414.67                                            |                                    |
| h, k, lmax             | 38, 38, 25                                         | 36, 38, 24                         |
| Nref                   | 19525                                              | 18988                              |
| Tmin, Tmax             |                                                    | 1.000, 1.000                       |
| Tmin'                  |                                                    |                                    |

Correction method= # Reported T Limits: Tmin=1.000 Tmax=1.000

AbsCorr = SPHERE

Data completeness= 0.972

Theta (max)= 60.103

R(reflections)= 0.0917( 8856)

wR2(reflections)=  
0.3196( 18988)

S = 1.003

Npar= 887

---

The following ALERTS were generated. Each ALERT has the format  
**test-name\_ALERT\_alert-type\_alert-level.**  
Click on the hyperlinks for more details of the test.

---

 **Alert level A**

PLAT973\_ALERT\_2\_A Check Calcd Positive Resid. Density on Pb3 2.39 eA-3

**Author Response:** These alerts are generated because of residual density peaks near the heaviest atoms in the structure, due to fourier termination ripples. After inspection, the residual electron density peak does not make chemical sense and will not affect the correct identification of the structure.

PLAT973\_ALERT\_2\_A Check Calcd Positive Resid. Density on Pb2 2.28 eA-3

**Author Response:** These alerts are generated because of residual density peaks near the heaviest atoms in the structure, due to fourier termination ripples. After inspection, the residual electron density peak does not make chemical sense and will not affect the correct identification of the structure.

---

 **Alert level B**

PLAT241\_ALERT\_2\_B High 'MainMol' Ueq as Compared to Neighbors of S1 Check

**Author Response:** These alerts are generated because of a slight unresolved disorder caused by free rotation of the flexible chain at the end of the ligand. Some refi commands such as DELU, SIMU and ISOR were used to address such abnormal Ueq value, but failed. After inspection, this does not affect the correct assign of atom types.

PLAT241\_ALERT\_2\_B High 'MainMol' Ueq as Compared to Neighbors of C4 Check

**Author Response:** These alerts are generated because of a slight unresolved disorder caused by free rotation of the flexible chain at the end of the ligand. Some refi commands such as DELU, SIMU and ISOR were used to address such abnormal Ueq value, but failed. After inspection, this does not affect the correct assign of atom types.

PLAT241\_ALERT\_2\_B High 'MainMol' Ueq as Compared to Neighbors of C5 Check

**Author Response:** These alerts are generated because of a slight unresolved disorder caused by free rotation of the flexible chain at the end of the ligand. Some refi commands such as DELU, SIMU and ISOR were used to address such abnormal Ueq value, but failed. After inspection, this does not affect the correct assign of atom types.

PLAT241\_ALERT\_2\_B High 'MainMol' Ueq as Compared to Neighbors of C44 Check

**Author Response:** These alerts are generated because of a slight unresolved disorder caused by free rotation of the flexible chain at the end of the ligand. Some refi commands such as DELU, SIMU and ISOR were used to address such abnormal Ueq value, but failed. After inspection, this does not affect the correct assign of atom types.

PLAT242\_ALERT\_2\_B Low 'MainMol' Ueq as Compared to Neighbors of N1 Check

**Author Response:** These alerts are generated because of a slight unresolved disorder caused by free rotation of the flexible chain at the end of the ligand. Some refi commands such as DELU, SIMU and ISOR were used to address such abnormal Ueq value, but failed. After inspection, this does not affect the correct assign of atom types.

PLAT242\_ALERT\_2\_B Low 'MainMol' Ueq as Compared to Neighbors of N3 Check

**Author Response:** These alerts are generated because of a slight unresolved disorder caused by free rotation of the flexible chain at the end of the ligand. Some refi commands such as DELU, SIMU and ISOR were used to address such abnormal Ueq value, but failed. After inspection, this does not affect the correct assign of atom types.

PLAT242\_ALERT\_2\_B Low 'MainMol' Ueq as Compared to Neighbors of C9 Check

**Author Response:** These alerts are generated because of a slight unresolved disorder caused by free rotation of the flexible chain at the end of the ligand. Some refi commands such as DELU, SIMU and ISOR were used to address such abnormal Ueq value, but failed. After inspection, this does not affect the correct assign of atom types.

PLAT242\_ALERT\_2\_B Low 'MainMol' Ueq as Compared to Neighbors of C33 Check

**Author Response:** These alerts are generated because of a slight unresolved disorder caused by free rotation of the flexible chain at the end of the ligand. Some refi commands such as DELU, SIMU and ISOR were used to address such abnormal Ueq value, but failed. After inspection, this does not affect the correct assign of atom types.

PLAT260\_ALERT\_2\_B Large Average Ueq of Residue Including C19 0.309 Check

**Author Response:** These alerts are generated because of a slight unresolved disorder caused by free rotation of the flexible chain at the end of the ligand. Some refi commands such as DELU, SIMU and ISOR were used to address such abnormal Ueq value, but failed. After inspection, this does not affect the correct assign of atom types.

PLAT342\_ALERT\_3\_B Low Bond Precision on C-C Bonds ..... 0.023 Ang.

**Author Response:** These alerts are generated because of a slight unresolved disorder caused by free rotation of the flexible chain at the end of the ligand. Some refi commands such as DELU, SIMU and ISOR were used to address such abnormal Ueq value, but failed. After inspection, this does not affect the correct assign of atom types.

PLAT973\_ALERT\_2\_B Check Calcd Positive Resid. Density on Pb1 1.61 eA-3

**Author Response:** These alerts are generated because of residual density peaks near the heaviest atoms in the structure, due to fourier termination ripples. After inspection, the residual electron density peak does not make chemical sense and will not affect the correct identification of the structure.

---

● **Alert level C**

RADNW01\_ALERT\_1\_C The radiation wavelength lies outside the expected range for the supplied radiation type. Expected range 1.34130-1.34150  
Wavelength given = 1.34050

|                   |                                                  |      |        |
|-------------------|--------------------------------------------------|------|--------|
| PLAT026_ALERT_3_C | Ratio Observed / Unique Reflections (too) Low .. | 47%  | Check  |
| PLAT084_ALERT_3_C | High wR2 Value (i.e. > 0.25) .....               | 0.32 | Report |
| PLAT094_ALERT_2_C | Ratio of Maximum / Minimum Residual Density .... | 2.91 | Report |
| PLAT220_ALERT_2_C | NonSolvent Resd 1 C Ueq(max)/Ueq(min) Range      | 4.2  | Ratio  |
| PLAT220_ALERT_2_C | NonSolvent Resd 1 O Ueq(max)/Ueq(min) Range      | 3.9  | Ratio  |
| PLAT222_ALERT_3_C | NonSolvent Resd 1 H Uiso(max)/Uiso(min) Range    | 6.5  | Ratio  |
| PLAT241_ALERT_2_C | High 'MainMol' Ueq as Compared to Neighbors of   | 03   | Check  |

**Author Response:** These alerts are generated because of a slight unresolved disorder caused by free rotation of the flexible chain at the end of the ligand. Some refi commands such as DELU, SIMU and ISOR were used to address such abnormal Ueq value, but failed. After inspection, this does not affect the correct assign of atom types.

PLAT241\_ALERT\_2\_C High 'MainMol' Ueq as Compared to Neighbors of C3 Check

**Author Response:** These alerts are generated because of a slight unresolved disorder caused by free rotation of the flexible chain at the end of the ligand. Some refi commands such as DELU, SIMU and ISOR were used to address such abnormal Ueq value, but failed. After inspection, this does not affect the correct assign of atom types.

PLAT241\_ALERT\_2\_C High 'MainMol' Ueq as Compared to Neighbors of C23 Check

**Author Response:** These alerts are generated because of a slight unresolved disorder caused by free rotation of the flexible chain at the end of the ligand. Some refi commands such as DELU, SIMU and ISOR were used to address such abnormal Ueq value, but failed. After inspection, this does not affect the correct assign of atom types.

PLAT241\_ALERT\_2\_C High 'MainMol' Ueq as Compared to Neighbors of C28 Check

**Author Response:** These alerts are generated because of a slight unresolved disorder caused by free rotation of the flexible chain at the end of the ligand. Some refi commands such as DELU, SIMU and ISOR were used to address such abnormal Ueq value, but failed. After inspection, this does not affect the correct assign of atom types.

PLAT241\_ALERT\_2\_C High 'MainMol' Ueq as Compared to Neighbors of C48 Check

**Author Response:** These alerts are generated because of a slight unresolved disorder caused by free rotation of the flexible chain at the end of the ligand. Some refi commands such as DELU, SIMU and ISOR were used to address such abnormal Ueq value, but failed. After inspection, this does not affect the correct assign of atom types.

PLAT241\_ALERT\_2\_C High 'MainMol' Ueq as Compared to Neighbors of C53 Check

**Author Response:** These alerts are generated because of a slight unresolved disorder caused by free rotation of the flexible chain at the end of the ligand. Some refi commands such as DELU, SIMU and ISOR were used to address such abnormal Ueq value, but failed. After inspection, this does not affect the correct assign of atom types.

PLAT242\_ALERT\_2\_C Low 'MainMol' Ueq as Compared to Neighbors of N2 Check

**Author Response:** These alerts are generated because of a slight unresolved disorder caused by free rotation of the flexible chain at the end of the ligand. Some refi commands such as DELU, SIMU and ISOR were used to address such abnormal Ueq value, but failed. After inspection, this does not affect the correct assign of atom types.

PLAT242\_ALERT\_2\_C Low 'MainMol' Ueq as Compared to Neighbors of C15 Check

**Author Response:** These alerts are generated because of a slight unresolved disorder caused by free rotation of the flexible chain at the end of the ligand. Some refi commands such as DELU, SIMU and ISOR were used to address such abnormal Ueq value, but failed. After inspection, this does not affect the correct assign of atom types.

PLAT242\_ALERT\_2\_C Low 'MainMol' Ueq as Compared to Neighbors of C17 Check

**Author Response:** These alerts are generated because of a slight unresolved disorder caused by free rotation of the flexible chain at the end of the ligand. Some refi commands such as DELU, SIMU and ISOR were used to address such abnormal Ueq value, but failed. After inspection, this does not affect the correct assign of atom types.

PLAT242\_ALERT\_2\_C Low 'MainMol' Ueq as Compared to Neighbors of C26 Check

**Author Response:** These alerts are generated because of a slight unresolved disorder caused by free rotation of the flexible chain at the end of the ligand. Some refi commands such as DELU, SIMU and ISOR were used to address such abnormal Ueq value, but failed. After inspection, this does not affect the correct assign of atom types.

PLAT242\_ALERT\_2\_C Low 'MainMol' Ueq as Compared to Neighbors of C29 Check

**Author Response:** These alerts are generated because of a slight unresolved disorder caused by free rotation of the flexible chain at the end of the ligand. Some refi commands such as DELU, SIMU and ISOR were used to address such abnormal Ueq value, but failed. After inspection, this does not affect the correct assign of atom types.

PLAT242\_ALERT\_2\_C Low 'MainMol' Ueq as Compared to Neighbors of C32 Check

**Author Response:** These alerts are generated because of a slight unresolved disorder caused by free rotation of the flexible chain at the end of the ligand. Some refi commands such as DELU, SIMU and ISOR were used to address such abnormal Ueq value, but failed. After inspection, this does not affect the correct assign of atom types.

PLAT242\_ALERT\_2\_C Low 'MainMol' Ueq as Compared to Neighbors of C37 Check

**Author Response:** These alerts are generated because of a slight unresolved disorder caused by free rotation of the flexible chain at the end of the ligand. Some refi commands such as DELU, SIMU and ISOR were used to address such abnormal Ueq value, but failed. After inspection, this does not affect the correct assign of atom types.

PLAT242\_ALERT\_2\_C Low 'MainMol' Ueq as Compared to Neighbors of C49 Check

**Author Response:** These alerts are generated because of a slight unresolved disorder caused by free rotation of the flexible chain at the end of the ligand. Some refi commands such as DELU, SIMU and ISOR were used to address such abnormal Ueq value, but failed. After inspection, this does not affect the correct assign of atom types.

PLAT242\_ALERT\_2\_C Low 'MainMol' Ueq as Compared to Neighbors of C52 Check

**Author Response:** These alerts are generated because of a slight unresolved disorder caused by free rotation of the flexible chain at the end of the ligand. Some refi commands such as DELU, SIMU and ISOR were used to address such abnormal Ueq value, but failed. After inspection, this does not affect the correct assign of atom types.

PLAT242\_ALERT\_2\_C Low 'MainMol' Ueq as Compared to Neighbors of C57 Check

**Author Response: These alerts are generated because of a slight unresolved disorder caused by free rotation of the flexible chain at the end of the ligand. Some refi commands such as DELU, SIMU and ISOR were used to address such abnormal Ueq value, but failed. After inspection, this does not affect the correct assign of atom types.**

PLAT260\_ALERT\_2\_C Large Average Ueq of Residue Including Pb1 0.185 Check

**Author Response: These alerts are generated because of a slight unresolved disorder caused by free rotation of the flexible chain at the end of the ligand. Some refi commands such as DELU, SIMU and ISOR were used to address such abnormal Ueq value, but failed. After inspection, this does not affect the correct assign of atom types.**

PLAT329\_ALERT\_4\_C Carbon Atom Hybridisation Unclear for ..... C22 Check  
 PLAT329\_ALERT\_4\_C Carbon Atom Hybridisation Unclear for ..... C47 Check  
 PLAT360\_ALERT\_2\_C Short C(sp3)-C(sp3) Bond C37 - C38 . 1.42 Ang.  
 PLAT360\_ALERT\_2\_C Short C(sp3)-C(sp3) Bond C57 - C58 . 1.43 Ang.  
 PLAT412\_ALERT\_2\_C Short Intra XH3 .. XHn H36B ..H38B . 1.80 Ang.  
 x,y,z = 1\_555 Check  
 PLAT905\_ALERT\_3\_C Negative K value in the Analysis of Variance ... -14.359 Report  
 PLAT911\_ALERT\_3\_C Missing FCF Refl Between Thmin & STh/L= 0.600 67 Report  
 2 2 0, 3 3 0, -2 4 0, 0 4 0, 2 4 0, -1 5 0,  
 8 10 0, -5 17 0, 0 22 0, 1 1 1, 1 3 1, 2 3 1,  
 -1 4 1, 1 4 1, 2 4 1, -4 5 1, -2 5 1, 2 5 1,  
 5 5 1, -2 7 1, -1 8 1, 7 8 1, -6 15 1, 0 1 2,  
 1 2 2, 0 3 2, 1 3 2, -2 5 2, -1 5 2, 2 5 2,  
 3 5 2, -5 6 2, -3 6 2, -4 7 2, -1 8 2, 6 8 2,  
 6 9 2, 9 10 2, -5 11 2, 1 2 3, -1 4 3, -2 5 3,  
 3 7 3, -4 8 3, -7 12 3, 7 13 3, 2 3 4, 3 5 5,  
 0 0 6, 2 2 6, -1 3 6, 0 9 6, 5 9 6, -2 10 6,  
 10 10 6, 11 11 6, -4 5 8, 3 5 8, 2 18 10, -5 19 10,  
 1 19 10, 2 19 10, 15 21 14, 15 22 14, 16 22 14, 15 23 14,  
 14 24 14,  
 PLAT971\_ALERT\_2\_C Check Calcd Resid. Dens. 0.93Ang From Pb3 2.49 eA-3  
 PLAT971\_ALERT\_2\_C Check Calcd Resid. Dens. 0.95Ang From Pb2 2.10 eA-3  
 PLAT971\_ALERT\_2\_C Check Calcd Resid. Dens. 1.06Ang From Pb3 1.94 eA-3  
 PLAT971\_ALERT\_2\_C Check Calcd Resid. Dens. 1.01Ang From Pb2 1.83 eA-3  
 PLAT971\_ALERT\_2\_C Check Calcd Resid. Dens. 1.10Ang From Pb1 1.80 eA-3  
 PLAT971\_ALERT\_2\_C Check Calcd Resid. Dens. 1.00Ang From Pb2 1.76 eA-3  
 PLAT971\_ALERT\_2\_C Check Calcd Resid. Dens. 0.90Ang From Pb2 1.71 eA-3  
 PLAT971\_ALERT\_2\_C Check Calcd Resid. Dens. 0.97Ang From Pb2 1.63 eA-3  
 PLAT976\_ALERT\_2\_C Check Calcd Resid. Dens. 0.62Ang From C45 . -0.42 eA-3  
 PLAT977\_ALERT\_2\_C Check Negative Difference Density on H43A . -0.32 eA-3  
 PLAT977\_ALERT\_2\_C Check Negative Difference Density on H45C . -0.33 eA-3

### Alert level G

ABSMU01\_ALERT\_1\_G Calculation of \_exptl\_absorpt\_correction\_mu  
 not performed for this radiation type.  
 PLAT002\_ALERT\_2\_G Number of Distance or Angle Restraints on AtSite 30 Note  
 PLAT003\_ALERT\_2\_G Number of Uiso or U(i,j) Restrained non-H Atoms 50 Report  
 PLAT004\_ALERT\_5\_G Polymeric Structure Found with Maximum Dimension 2 Info





```

PLAT432_ALERT_2_G Short Inter X...Y Contact N2 ..C21 . 2.94 Ang.
x,y,z = 1_555 Check
PLAT432_ALERT_2_G Short Inter X...Y Contact C19 ..C22 . 2.39 Ang.
x,y,z = 1_555 Check
PLAT432_ALERT_2_G Short Inter X...Y Contact C19 ..C25 . 2.94 Ang.
-1/2+y,1-x,1-z = 7_566 Check
PLAT432_ALERT_2_G Short Inter X...Y Contact C19 ..C23 . 3.07 Ang.
x,y,z = 1_555 Check
PLAT432_ALERT_2_G Short Inter X...Y Contact C20 ..C22 . 2.35 Ang.
x,y,z = 1_555 Check
PLAT432_ALERT_2_G Short Inter X...Y Contact C21 ..C22 . 1.91 Ang.
x,y,z = 1_555 Check
PLAT606_ALERT_4_G Solvent Accessible VOID(S) in Structure ..... ! Info
PLAT720_ALERT_4_G Number of Unusual/Non-Standard Labels ..... 8 Note
H3AA H3AB H3BC H3BD H6AA H6AB H6BC H6BD
PLAT721_ALERT_1_G Bond Calc 0.99000, Rep 0.97990 Dev... 0.01 Ang.
C42 -H42C 1_555 1_555 ..... # 197 Check
PLAT721_ALERT_1_G Bond Calc 0.97000, Rep 0.98020 Dev... 0.01 Ang.
C1 -H1C 1_555 1_555 ..... # 232 Check
PLAT721_ALERT_1_G Bond Calc 0.97000, Rep 0.98010 Dev... 0.01 Ang.
C45 -H45B 1_555 1_555 ..... # 234 Check
PLAT721_ALERT_1_G Bond Calc 0.99000, Rep 0.97990 Dev... 0.01 Ang.
C45 -H45C 1_555 1_555 ..... # 235 Check
PLAT722_ALERT_1_G Angle Calc 105.00, Rep 106.70 Dev... 1.70 Degree
C21 -C20 -H20A 1_555 1_555 1_555 # 403 Check
PLAT722_ALERT_1_G Angle Calc 111.00, Rep 109.50 Dev... 1.50 Degree
H20B -C20 -H20C 1_555 1_555 1_555 # 408 Check
PLAT722_ALERT_1_G Angle Calc 110.00, Rep 111.80 Dev... 1.80 Degree
H19B -C19 -H19C 1_555 1_555 1_555 # 414 Check
PLAT722_ALERT_1_G Angle Calc 119.00, Rep 117.90 Dev... 1.10 Degree
C47 -C46 -H46C 1_555 1_555 1_555 # 447 Check
PLAT722_ALERT_1_G Angle Calc 111.00, Rep 109.50 Dev... 1.50 Degree
H45A -C45 -H45B 1_555 1_555 1_555 # 511 Check
PLAT773_ALERT_2_G Check long C-C Bond in CIF: C22 --C21 1.91 Ang.
PLAT780_ALERT_1_G Coordinates do not Form a Properly Connected Set Please Do !
PLAT794_ALERT_5_G Tentative Bond Valency for Pb1 (II) . 2.14 Info
PLAT794_ALERT_5_G Tentative Bond Valency for Pb3 (II) . 2.00 Info
PLAT794_ALERT_5_G Tentative Bond Valency for Al1 (III) . 2.82 Info
PLAT794_ALERT_5_G Tentative Bond Valency for Al2 (III) . 2.78 Info
PLAT794_ALERT_5_G Tentative Bond Valency for Al3 (III) . 2.99 Info
PLAT794_ALERT_5_G Tentative Bond Valency for Al4 (III) . 2.77 Info
PLAT794_ALERT_5_G Tentative Bond Valency for Al6 (III) . 2.74 Info
PLAT794_ALERT_5_G Tentative Bond Valency for Al8 (III) . 2.78 Info
PLAT802_ALERT_4_G CIF Input Record(s) with more than 80 Characters 8 Info
PLAT860_ALERT_3_G Number of Least-Squares Restraints ..... 744 Note
PLAT868_ALERT_4_G ALERTS Due to the Use of _smtbx_masks Suppressed ! Info
PLAT910_ALERT_3_G Missing # of FCF Reflection(s) Below Theta(Min). 2 Note
1 1 0, 0 0 1,
PLAT912_ALERT_4_G Missing # of FCF Reflections Above STh/L= 0.600 462 Note
PLAT913_ALERT_3_G Missing # of Very Strong Reflections in FCF .... 1 Note
1 1 0,
PLAT933_ALERT_2_G Number of HKL-OMIT Records in Embedded .res File 65 Note
0 1 2, -1 8 1, 9 18 21, 5 9 6, 0 32 13, 5 5 1,
21 22 15, -2 7 1, 7 16 21, -11 27 16, 1 2 2, 2 5 1,
7 8 1, -21 22 15, -11 35 7, 9 20 20, 9 10 2, 20 23 15,
1 2 3, -5 11 2, 2 3 4, -1 3 6, -1 4 3, 0 9 6,
-1 8 2, 6 8 2, -1 5 2, 2 5 2, 7 13 3, 3 5 5,

```

```

10 10 6, 2 4 1, -2 10 6, 3 5 2, -1 4 1, -4 5 1,
2 4 0, 3 7 3, -2 4 0, 1 3 2, -1 5 0, 0 3 2,
6 9 2, 3 3 0, -2 5 1, 2 3 1, 11 11 6, -11 33 10,
0 24 19, -6 15 1,
PLAT941_ALERT_3_G Average HKL Measurement Multiplicity ..... 2.7 Low
PLAT950_ALERT_5_G Calculated (ThMax) and CIF-Reported Hmax Differ 2 Units
PLAT969_ALERT_5_G The 'Henn et al.' R-Factor-gap value ..... 4.923 Note
Predicted wR2: Based on SigI**2 6.49 or SHELX Weight 31.88
PLAT978_ALERT_2_G Number C-C Bonds with Positive Residual Density. 0 Info
PLAT984_ALERT_1_G The C-f' = 0.0147 Deviates from the B&C-Value 0.0137 Check
PLAT984_ALERT_1_G The N-f' = 0.0253 Deviates from the B&C-Value 0.0241 Check
PLAT984_ALERT_1_G The O-f' = 0.0412 Deviates from the B&C-Value 0.0389 Check
PLAT984_ALERT_1_G The Pb-f' = -4.2646 Deviates from the B&C-Value -4.4950 Check
PLAT985_ALERT_1_G The Al-f" = 0.1843 Deviates from the B&C-Value 0.1873 Check
PLAT985_ALERT_1_G The Pb-f" = 7.1982 Deviates from the B&C-Value 6.8412 Check
PLAT985_ALERT_1_G The S-f" = 0.4242 Deviates from the B&C-Value 0.4295 Check

```

---

2 **ALERT level A** = Most likely a serious problem - resolve or explain  
11 **ALERT level B** = A potentially serious problem, consider carefully  
42 **ALERT level C** = Check. Ensure it is not caused by an omission or oversight  
87 **ALERT level G** = General information/check it is not something unexpected

22 ALERT type 1 CIF construction/syntax error, inconsistent or missing data  
73 ALERT type 2 Indicator that the structure model may be wrong or deficient  
21 ALERT type 3 Indicator that the structure quality may be low  
14 ALERT type 4 Improvement, methodology, query or suggestion  
12 ALERT type 5 Informative message, check

---

## checkCIF publication errors

---

### Alert level A

PUBL004\_ALERT\_1\_A The contact author's name and address are missing,  
    `_publ_contact_author_name` and `_publ_contact_author_address`.  
PUBL005\_ALERT\_1\_A `_publ_contact_author_email`, `_publ_contact_author_fax` and  
    `_publ_contact_author_phone` are all missing.  
    At least one of these should be present.  
PUBL006\_ALERT\_1\_A `_publ_requested_journal` is missing  
    e.g. 'Acta Crystallographica Section C'  
PUBL008\_ALERT\_1\_A `_publ_section_title` is missing. Title of paper.  
PUBL009\_ALERT\_1\_A `_publ_author_name` is missing. List of author(s) name(s).  
PUBL010\_ALERT\_1\_A `_publ_author_address` is missing. Author(s) address(es).  
PUBL012\_ALERT\_1\_A `_publ_section_abstract` is missing.  
    Abstract of paper in English.

---

7 **ALERT level A** = Data missing that is essential or data in wrong format  
0 **ALERT level G** = General alerts. Data that may be required is missing

---

## Publication of your CIF

You should attempt to resolve as many as possible of the alerts in all categories. Often the minor alerts point to easily fixed oversights, errors and omissions in your CIF or refinement strategy, so attention to these fine details can be worthwhile. In order to resolve some of the more serious problems it may be necessary to carry out additional measurements or structure refinements. However, the nature of your study may justify the reported deviations from journal submission requirements and the more serious of these should be commented upon in the discussion or experimental section of a paper or in the "special\_details" fields of the CIF. *checkCIF* was carefully designed to identify outliers and unusual parameters, but every test has its limitations and alerts that are not important in a particular case may appear. Conversely, the absence of alerts does not guarantee there are no aspects of the results needing attention. It is up to the individual to critically assess their own results and, if necessary, seek expert advice.

If level A alerts remain, which you believe to be justified deviations, and you intend to submit this CIF for publication in a journal, you should additionally insert an explanation in your CIF using the Validation Reply Form (VRF) below. This will allow your explanation to be considered as part of the review process.

## Validation response form

Please find below a validation response form (VRF) that can be filled in and pasted into your CIF.

```
# start Validation Reply Form
_vrf_PUBL004_GLOBAL
;
PROBLEM: The contact author's name and address are missing,
RESPONSE: ...
;
_vrf_PUBL005_GLOBAL
;
PROBLEM: _publ_contact_author_email, _publ_contact_author_fax and
RESPONSE: ...
;
_vrf_PUBL006_GLOBAL
;
PROBLEM: _publ_requested_journal is missing
RESPONSE: ...
;
_vrf_PUBL008_GLOBAL
;
PROBLEM: _publ_section_title is missing. Title of paper.
RESPONSE: ...
;
_vrf_PUBL009_GLOBAL
;
PROBLEM: _publ_author_name is missing. List of author(s) name(s).
RESPONSE: ...
;
_vrf_PUBL010_GLOBAL
;
PROBLEM: _publ_author_address is missing. Author(s) address(es).
```

```
RESPONSE: ...  
;  
_vrf_PUBL012_GLOBAL  
;  
PROBLEM: _publ_section_abstract is missing.  
RESPONSE: ...  
;  
# end Validation Reply Form
```

If you wish to submit your CIF for publication in Acta Crystallographica Section C or E, you should upload your CIF via the web. If you wish to submit your CIF for publication in IUCrData you should upload your CIF via the web. If your CIF is to form part of a submission to another IUCr journal, you will be asked, either during electronic submission or by the Co-editor handling your paper, to upload your CIF via our web site.

---

**PLATON version of 15/07/2024; check.def file version of 15/07/2024**

Datablock SAIOC-1-recover - ellipsoid plot

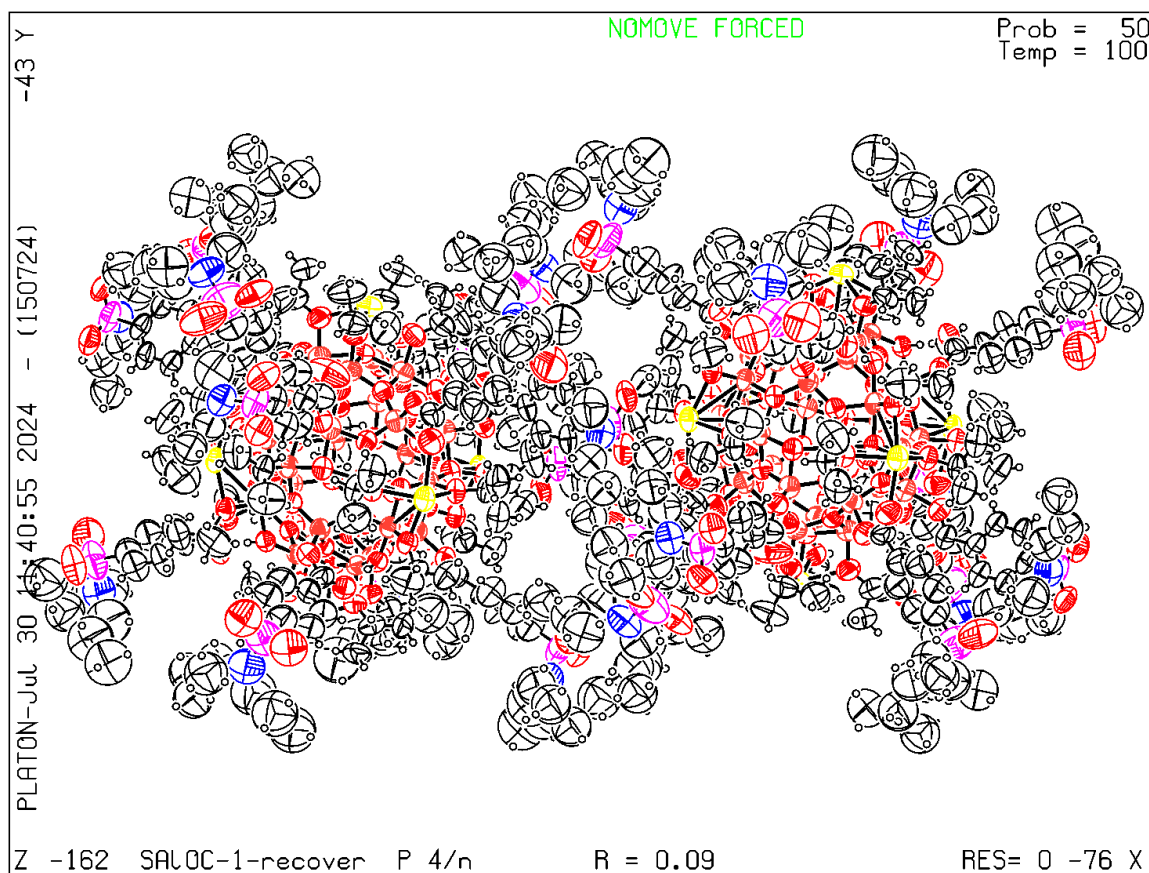

Supplement: Supplementary file 8 [file 51d0aaa6ea8c66a710f498dc.pdf]
