# Supplementary material for: Precise Nanochemistry of Spherical Aluminum Oxo Clusters for Accurate Surface Guest Recognition and Release
Source: Research Square preprint supplement (doi:10.21203/rs.3.rs-4948547/v1), 2024-11-06

## checkCIF/PLATON report

Structure factors have been supplied for datablock(s) SAIOC-1@G3

THIS REPORT IS FOR GUIDANCE ONLY. IF USED AS PART OF A REVIEW PROCEDURE FOR PUBLICATION, IT SHOULD NOT REPLACE THE EXPERTISE OF AN EXPERIENCED CRYSTALLOGRAPHIC REFEREE.

No syntax errors found.      CIF dictionary      Interpreting this report

### Datablock: SAIOC-1@G3

---

|                        |                                                                  |                                                   |                           |
|------------------------|------------------------------------------------------------------|---------------------------------------------------|---------------------------|
| Bond precision:        | C-C = 0.0185 Å                                                   | Wavelength=1.34050                                |                           |
| Cell:                  | a=29.9222 (4)<br>alpha=90                                        | b=29.9222 (4)<br>beta=90                          | c=19.3494 (4)<br>gamma=90 |
| Temperature:           | 100 K                                                            |                                                   |                           |
|                        | Calculated                                                       | Reported                                          |                           |
| Volume                 | 17324.3 (6)                                                      | 17324.3 (6)                                       |                           |
| Space group            | P 4/n                                                            | P 4/n                                             |                           |
| Hall group             | -P 4a                                                            | -P 4a                                             |                           |
| Moiety formula         | C216 H364 Al32 N12 O110 Pb6<br>S12, 4 (C3 H7 N O) [+<br>solvent] | C216 H364 Al32 N12 O110 Pb6<br>S12, 4 (C3 H7 N O) |                           |
| Sum formula            | C228 H392 Al32 N16 O114 Pb6<br>S12 [+ solvent]                   | C228 H392 Al32 N16 O114 Pb6<br>S12                |                           |
| Mr                     | 7672.88                                                          | 7672.77                                           |                           |
| Dx, g cm <sup>-3</sup> | 1.471                                                            | 1.471                                             |                           |
| Z                      | 2                                                                | 2                                                 |                           |
| Mu (mm <sup>-1</sup> ) | 5.131                                                            | 5.275                                             |                           |
| F000                   | 7768.0                                                           | 7768.0                                            |                           |
| F000'                  | 7747.40                                                          |                                                   |                           |
| h, k, lmax             | 35, 35, 22                                                       | 35, 33, 22                                        |                           |
| Nref                   | 14778                                                            | 14729                                             |                           |
| Tmin, Tmax             |                                                                  | 1.000, 1.000                                      |                           |
| Tmin'                  |                                                                  |                                                   |                           |

Correction method= # Reported T Limits: Tmin=1.000 Tmax=1.000  
AbsCorr = SPHERE

Data completeness= 0.997      Theta (max)= 52.046

R(reflections)= 0.0803( 9937)

wR2(reflections)=  
0.2521( 14729)

S = 1.016

Npar= 916

---

The following ALERTS were generated. Each ALERT has the format  
**test-name\_ALERT\_alert-type\_alert-level**.  
Click on the hyperlinks for more details of the test.

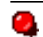

#### Alert level A

PLAT973\_ALERT\_2\_A Check Calcd Positive Resid. Density on Pb3 3.54 eA-3

**Author Response:** These alerts are generated because of residual density peaks near the heaviest atoms in the structure, due to fourier termination ripples. After inspection, the residual electron density peak does not make chemical sense and will not affect the correct identification of the structure.

PLAT973\_ALERT\_2\_A Check Calcd Positive Resid. Density on Pb2 2.75 eA-3

**Author Response:** These alerts are generated because of residual density peaks near the heaviest atoms in the structure, due to fourier termination ripples. After inspection, the residual electron density peak does not make chemical sense and will not affect the correct identification of the structure.

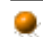

#### Alert level B

PLAT241\_ALERT\_2\_B High 'MainMol' Ueq as Compared to Neighbors of C4 Check

**Author Response:** These alerts are generated because of a slight unresolved disorder caused by free rotation of the flexible chain at the end of the ligand. Some refi commands such as DELU, SIMU and ISOR were used to address such abnormal Ueq value, but failed. After inspection, this does not affect the correct assign of atom types.

PLAT242\_ALERT\_2\_B Low 'MainMol' Ueq as Compared to Neighbors of N4 Check

**Author Response:** These alerts are generated because of a slight unresolved disorder caused by free rotation of the flexible chain at the end of the ligand. Some refi commands such as DELU, SIMU and ISOR were used to address such abnormal Ueq value, but failed. After inspection, this does not affect the correct assign of atom types.

PLAT971\_ALERT\_2\_B Check Calcd Resid. Dens. 0.73Ang From Pb2

3.20 eA-3

**Author Response:** These alerts are generated because of residual density peaks near the heaviest atoms in the structure, due to fourier termination ripples. After inspection, the residual electron density peak does not make chemical sense and will not affect the correct identification of the structure.

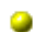

#### Alert level C

RADNW01\_ALERT\_1\_C The radiation wavelength lies outside the expected range for the supplied radiation type. Expected range 1.34130-1.34150  
Wavelength given = 1.34050

THETM01\_ALERT\_3\_C The value of sine(theta\_max)/wavelength is less than 0.590  
Calculated sin(theta\_max)/wavelength = 0.5882

|                   |                                                  |      |        |
|-------------------|--------------------------------------------------|------|--------|
| PLAT094_ALERT_2_C | Ratio of Maximum / Minimum Residual Density .... | 2.77 | Report |
| PLAT220_ALERT_2_C | NonSolvent Resd 1 C Ueq(max)/Ueq(min) Range      | 4.3  | Ratio  |
| PLAT220_ALERT_2_C | NonSolvent Resd 1 O Ueq(max)/Ueq(min) Range      | 3.6  | Ratio  |
| PLAT222_ALERT_3_C | NonSolvent Resd 1 H Uiso(max)/Uiso(min) Range    | 6.2  | Ratio  |
| PLAT241_ALERT_2_C | High 'MainMol' Ueq as Compared to Neighbors of   | S1   | Check  |

**Author Response:** These alerts are generated because of a slight unresolved disorder caused by free rotation of the flexible chain at the end of the ligand. Some refi commands such as DELU, SIMU and ISOR were used to address such abnormal Ueq value, but failed. After inspection, this does not affect the correct assign of atom types.

PLAT241\_ALERT\_2\_C High 'MainMol' Ueq as Compared to Neighbors of

O4 Check

**Author Response:** These alerts are generated because of a slight unresolved disorder caused by free rotation of the flexible chain at the end of the ligand. Some refi commands such as DELU, SIMU and ISOR were used to address such abnormal Ueq value, but failed. After inspection, this does not affect the correct assign of atom types.

PLAT241\_ALERT\_2\_C High 'MainMol' Ueq as Compared to Neighbors of

C5 Check

**Author Response:** These alerts are generated because of a slight unresolved disorder caused by free rotation of the flexible chain at the end of the ligand. Some refi commands such as DELU, SIMU and ISOR were used to address such abnormal Ueq value, but failed. After inspection, this does not affect the correct assign of atom types.

PLAT241\_ALERT\_2\_C High 'MainMol' Ueq as Compared to Neighbors of

C9 Check

**Author Response:** These alerts are generated because of a slight unresolved disorder caused by free rotation of the flexible chain at the end of the ligand. Some refi commands such as DELU, SIMU and ISOR were used to address such abnormal Ueq value, but failed. After inspection, this does not affect the correct assign of atom types.

PLAT241\_ALERT\_2\_C High 'MainMol' Ueq as Compared to Neighbors of C13 Check

**Author Response:** These alerts are generated because of a slight unresolved disorder caused by free rotation of the flexible chain at the end of the ligand. Some refi commands such as DELU, SIMU and ISOR were used to address such abnormal Ueq value, but failed. After inspection, this does not affect the correct assign of atom types.

PLAT241\_ALERT\_2\_C High 'MainMol' Ueq as Compared to Neighbors of C31 Check

**Author Response:** These alerts are generated because of a slight unresolved disorder caused by free rotation of the flexible chain at the end of the ligand. Some refi commands such as DELU, SIMU and ISOR were used to address such abnormal Ueq value, but failed. After inspection, this does not affect the correct assign of atom types.

PLAT241\_ALERT\_2\_C High 'MainMol' Ueq as Compared to Neighbors of C34 Check

**Author Response:** These alerts are generated because of a slight unresolved disorder caused by free rotation of the flexible chain at the end of the ligand. Some refi commands such as DELU, SIMU and ISOR were used to address such abnormal Ueq value, but failed. After inspection, this does not affect the correct assign of atom types.

PLAT241\_ALERT\_2\_C High 'MainMol' Ueq as Compared to Neighbors of C47 Check

**Author Response:** These alerts are generated because of a slight unresolved disorder caused by free rotation of the flexible chain at the end of the ligand. Some refi commands such as DELU, SIMU and ISOR were used to address such abnormal Ueq value, but failed. After inspection, this does not affect the correct assign of atom types.

PLAT241\_ALERT\_2\_C High 'MainMol' Ueq as Compared to Neighbors of C54 Check

**Author Response:** These alerts are generated because of a slight unresolved disorder caused by free rotation of the flexible chain at the end of the ligand. Some refi commands such as DELU, SIMU and ISOR were used to address such abnormal Ueq value, but failed. After inspection, this does not affect the correct assign of atom types.

PLAT242\_ALERT\_2\_C Low 'MainMol' Ueq as Compared to Neighbors of S2 Check

**Author Response:** These alerts are generated because of a slight unresolved disorder caused by free rotation of the flexible chain at the end of the ligand. Some refi commands such as DELU, SIMU and ISOR were used to address such abnormal Ueq value, but failed. After inspection, this does not affect the correct assign of atom types.

PLAT242\_ALERT\_2\_C Low 'MainMol' Ueq as Compared to Neighbors of N2 Check

**Author Response:** These alerts are generated because of a slight unresolved disorder caused by free rotation of the flexible chain at the end of the ligand. Some refi commands such as DELU, SIMU and ISOR were used to address such abnormal Ueq value, but failed. After inspection, this does not affect the correct assign of atom types.

PLAT242\_ALERT\_2\_C Low 'MainMol' Ueq as Compared to Neighbors of N3 Check

**Author Response:** These alerts are generated because of a slight unresolved disorder caused by free rotation of the flexible chain at the end of the ligand. Some refi commands such as DELU, SIMU and ISOR were used to address such abnormal Ueq value, but failed. After inspection, this does not affect the correct assign of atom types.

PLAT242\_ALERT\_2\_C Low 'MainMol' Ueq as Compared to Neighbors of C8 Check

**Author Response:** These alerts are generated because of a slight unresolved disorder caused by free rotation of the flexible chain at the end of the ligand. Some refi commands such as DELU, SIMU and ISOR were used to address such abnormal Ueq value, but failed. After inspection, this does not affect the correct assign of atom types.

PLAT242\_ALERT\_2\_C Low 'MainMol' Ueq as Compared to Neighbors of C14 Check

**Author Response:** These alerts are generated because of a slight unresolved disorder caused by free rotation of the flexible chain at the end of the ligand. Some refi commands such as DELU, SIMU and ISOR were used to address such abnormal Ueq value, but failed. After inspection, this does not affect the correct assign of atom types.

PLAT242\_ALERT\_2\_C Low 'MainMol' Ueq as Compared to Neighbors of C15 Check

**Author Response:** These alerts are generated because of a slight unresolved disorder caused by free rotation of the flexible chain at the end of the ligand. Some refi commands such as DELU, SIMU and ISOR were used to address such abnormal Ueq value, but failed. After inspection, this does not affect the correct assign of atom types.

PLAT242\_ALERT\_2\_C Low 'MainMol' Ueq as Compared to Neighbors of C19 Check

**Author Response:** These alerts are generated because of a slight unresolved disorder caused by free rotation of the flexible chain at the end of the ligand. Some refi commands such as DELU, SIMU and ISOR were used to address such abnormal Ueq value, but failed. After inspection, this does not affect the correct assign of atom types.

PLAT242\_ALERT\_2\_C Low 'MainMol' Ueq as Compared to Neighbors of C22 Check

**Author Response:** These alerts are generated because of a slight unresolved disorder caused by free rotation of the flexible chain at the end of the ligand. Some refi commands such as DELU, SIMU and ISOR were used to address such abnormal Ueq value, but failed. After inspection, this does not affect the correct assign of atom types.

PLAT242\_ALERT\_2\_C Low 'MainMol' Ueq as Compared to Neighbors of C39 Check

**Author Response:** These alerts are generated because of a slight unresolved disorder caused by free rotation of the flexible chain at the end of the ligand. Some refi commands such as DELU, SIMU and ISOR were used to address such abnormal Ueq value, but failed. After inspection, this does not affect the correct assign of atom types.

|                   |                                                  |           |                                 |         |           |
|-------------------|--------------------------------------------------|-----------|---------------------------------|---------|-----------|
| PLAT244_ALERT_4_C | Low                                              | 'Solvent' | Ueq as Compared to Neighbors of | N1      | Check     |
| PLAT260_ALERT_2_C | Large Average Ueq of Residue Including           | Pb1       |                                 | 0.141   | Check     |
| PLAT260_ALERT_2_C | Large Average Ueq of Residue Including           | O30       |                                 | 0.256   | Check     |
| PLAT317_ALERT_2_C | Too many H on C in C=N Moiety in Solvent/Ion ... |           |                                 | C58     | Check     |
| PLAT342_ALERT_3_C | Low Bond Precision on C-C Bonds .....            |           |                                 | 0.01851 | Ang.      |
| PLAT360_ALERT_2_C | Short C(sp3)-C(sp3) Bond                         | C19       | - C20                           | .       | 1.43 Ang. |
| PLAT410_ALERT_2_C | Short Intra H...H Contact                        | H51B      | ..H54A                          | .       | 1.94 Ang. |
|                   |                                                  |           | x,y,z =                         | 1_555   | Check     |

PLAT905\_ALERT\_3\_C Negative K value in the Analysis of Variance ... -0.136 Report  
 PLAT911\_ALERT\_3\_C Missing FCF Refl Between Thmin & STh/L= 0.588 47 Report  
 -5 9 0, 0 12 0, -1 2 1, -2 4 1, 2 4 1, -4 5 1,  
 1 6 1, 3 7 1, 1 9 1, 8 10 1, 4 11 1, 0 1 2,  
 -3 4 2, 6 6 2, -1 9 2, 6 12 2, -1 13 2, -2 6 3,  
 -8 12 3, -1 12 3, -3 14 3, 3 4 4, -4 5 4, -2 5 4,  
 -1 5 4, 1 8 4, -6 11 4, -1 2 5, 0 5 5, -5 9 5,  
 -4 9 5, 0 4 6, 3 7 6, -1 8 6, 10 10 6, -7 12 6,  
 -3 7 7, 7 13 7, 4 4 9, -1 8 9, 1 10 9, -2 8 10,  
 20 23 10, 19 24 10, 14 23 11, 15 23 11, 0 0 22,  
 PLAT971\_ALERT\_2\_C Check Calcd Resid. Dens. 0.91Ang From Pb2 2.36 eA-3

**Author Response:** These alerts are generated because of residual density peaks near the heaviest atoms in the structure, due to fourier termination ripples. After inspection, the residual electron density peak does not make chemical sense and will not affect the correct identification of the structure.

PLAT971\_ALERT\_2\_C Check Calcd Resid. Dens. 0.93Ang From Pb1 2.29 eA-3

**Author Response:** These alerts are generated because of residual density peaks near the heaviest atoms in the structure, due to fourier termination ripples. After inspection, the residual electron density peak does not make chemical sense and will not affect the correct identification of the structure.

PLAT971\_ALERT\_2\_C Check Calcd Resid. Dens. 0.30Ang From Pb1 1.98 eA-3

**Author Response:** These alerts are generated because of residual density peaks near the heaviest atoms in the structure, due to fourier termination ripples. After inspection, the residual electron density peak does not make chemical sense and will not affect the correct identification of the structure.

PLAT971\_ALERT\_2\_C Check Calcd Resid. Dens. 0.95Ang From Pb2 1.93 eA-3

**Author Response:** These alerts are generated because of residual density peaks near the heaviest atoms in the structure, due to fourier termination ripples. After inspection, the residual electron density peak does not make chemical sense and will not affect the correct identification of the structure.

PLAT971\_ALERT\_2\_C Check Calcd Resid. Dens. 0.90Ang From Pb1 1.92 eA-3

**Author Response:** These alerts are generated because of residual density peaks near the heaviest atoms in the structure, due to fourier termination ripples. After inspection, the residual electron density peak does not make chemical sense and will not affect the correct identification of the structure.

PLAT971\_ALERT\_2\_C Check Calcd Resid. Dens. 0.92Ang From Pb1 1.61 eA-3

**Author Response:** These alerts are generated because of residual density peaks near the heaviest atoms in the structure, due to fourier termination ripples. After inspection, the residual electron density peak does not make chemical sense and will not affect the correct identification of the structure.

|                   |                                           |                 |   |            |
|-------------------|-------------------------------------------|-----------------|---|------------|
| PLAT975_ALERT_2_C | Check Calcd Resid. Dens.                  | 0.95Ang From O2 | . | 0.69 eA-3  |
| PLAT977_ALERT_2_C | Check Negative Difference Density on H2BD |                 | . | -0.34 eA-3 |

Alert level G

|                   |                                                                                    |      |      |               |      |      |             |               |
|-------------------|------------------------------------------------------------------------------------|------|------|---------------|------|------|-------------|---------------|
| ABSMU01_ALERT_1_G | Calculation of _exptl_absorpt_correction_mu not performed for this radiation type. |      |      |               |      |      |             |               |
| PLAT002_ALERT_2_G | Number of Distance or Angle Restraints on AtSite                                   |      |      |               |      |      |             | 26 Note       |
| PLAT003_ALERT_2_G | Number of Uiso or U(i,j) Restrained non-H Atoms                                    |      |      |               |      |      |             | 25 Report     |
| PLAT007_ALERT_5_G | Number of Unrefined Donor-H Atoms .....                                            |      |      |               |      |      |             | 2 Report      |
|                   | H14                                                                                | H22  |      |               |      |      |             |               |
| PLAT051_ALERT_1_G | Mu(calc) and Mu(CIF) Ratio Differs from 1.0 by .                                   |      |      |               |      |      |             | 2.73 %        |
| PLAT069_ALERT_1_G | Atom Label Without Numerical Part .....                                            |      |      |               |      |      |             | A1 Do !       |
| PLAT072_ALERT_2_G | SHELXL First Parameter in WGHT Unusually Large                                     |      |      |               |      |      |             | 0.18 Report   |
| PLAT172_ALERT_4_G | The CIF-Embedded .res File Contains DFIX Records                                   |      |      |               |      |      |             | 25 Report     |
| PLAT177_ALERT_4_G | The CIF-Embedded .res File Contains DELU Records                                   |      |      |               |      |      |             | 4 Report      |
| PLAT178_ALERT_4_G | The CIF-Embedded .res File Contains SIMU Records                                   |      |      |               |      |      |             | 4 Report      |
| PLAT186_ALERT_4_G | The CIF-Embedded .res File Contains ISOR Records                                   |      |      |               |      |      |             | 3 Report      |
| PLAT187_ALERT_4_G | The CIF-Embedded .res File Contains RIGU Records                                   |      |      |               |      |      |             | 1 Report      |
| PLAT188_ALERT_3_G | A Non-default SIMU Restraint Value has been used                                   |      |      |               |      |      |             | 0.0100 Report |
| PLAT188_ALERT_3_G | A Non-default SIMU Restraint Value has been used                                   |      |      |               |      |      |             | 0.0100 Report |
| PLAT188_ALERT_3_G | A Non-default SIMU Restraint Value has been used                                   |      |      |               |      |      |             | 0.0100 Report |
| PLAT188_ALERT_3_G | A Non-default SIMU Restraint Value has been used                                   |      |      |               |      |      |             | 0.0100 Report |
| PLAT190_ALERT_3_G | A Non-default RIGU Restraint Value for First Par                                   |      |      |               |      |      |             | 0.0100 Report |
| PLAT190_ALERT_3_G | A Non-default RIGU Restraint Value for SecondPar                                   |      |      |               |      |      |             | 0.0200 Report |
| PLAT192_ALERT_3_G | A Non-default DELU Restraint Value for SecondPar                                   |      |      |               |      |      |             | 0.0200 Report |
| PLAT192_ALERT_3_G | A Non-default DELU Restraint Value for SecondPar                                   |      |      |               |      |      |             | 0.0200 Report |
| PLAT192_ALERT_3_G | A Non-default DELU Restraint Value for SecondPar                                   |      |      |               |      |      |             | 0.0200 Report |
| PLAT299_ALERT_4_G | Atom Site Occupancy Constrained at .....                                           |      |      |               |      |      |             | 0.5 Check     |
|                   | C1                                                                                 | C3   | C36  | C37           | H2AA | H1A  | H1B         | H1C           |
|                   | H2AB                                                                               | H2BC | H3A  | H3B           | H3C  | H2BD | H35A        | H35B          |
|                   | H35C                                                                               | H35D | H36A | H36B          | H36C | H37A | H37B        | H37C          |
| PLAT301_ALERT_3_G | Main Residue Disorder .....(Resd 1)                                                |      |      |               |      |      |             | 2% Note       |
| PLAT303_ALERT_2_G | Full Occupancy Atom H14 with # Connections                                         |      |      |               |      |      |             | 2.00 Check    |
| PLAT343_ALERT_2_G | Unusual sp3 Angle Range in Main Residue for                                        |      |      |               |      |      |             | C4 Check      |
| PLAT343_ALERT_2_G | Unusual sp3 Angle Range in Main Residue for                                        |      |      |               |      |      |             | C55 Check     |
| PLAT410_ALERT_2_G | Short Intra H...H Contact                                                          |      | H2AB | ..H4B         |      | .    | 1.99 Ang.   |               |
|                   |                                                                                    |      |      | x,y,z =       |      | .    | 1_555 Check |               |
| PLAT410_ALERT_2_G | Short Intra H...H Contact                                                          |      | H2BC | ..H4B         |      | .    | 2.01 Ang.   |               |
|                   |                                                                                    |      |      | x,y,z =       |      | .    | 1_555 Check |               |
| PLAT410_ALERT_2_G | Short Intra H...H Contact                                                          |      | H2BD | ..H4A         |      | .    | 2.07 Ang.   |               |
|                   |                                                                                    |      |      | x,y,z =       |      | .    | 1_555 Check |               |
| PLAT412_ALERT_2_G | Short Intra XH3 .. XHn                                                             |      | H34B | ..H36B        |      | .    | 1.64 Ang.   |               |
|                   |                                                                                    |      |      | x,y,z =       |      | .    | 1_555 Check |               |
| PLAT413_ALERT_2_G | Short Inter XH3 .. XHn                                                             |      | H3A  | ..H38C        |      | .    | 1.90 Ang.   |               |
|                   |                                                                                    |      |      | 1/2-y,x,1+z = |      | .    | 3_556 Check |               |
| PLAT413_ALERT_2_G | Short Inter XH3 .. XHn                                                             |      | H3C  | ..H55B        |      | .    | 2.14 Ang.   |               |
|                   |                                                                                    |      |      | -x,1-y,1-z =  |      | .    | 5_566 Check |               |



|                   |                                                            |                   |                             |               |
|-------------------|------------------------------------------------------------|-------------------|-----------------------------|---------------|
| PLAT413_ALERT_2_G | Short Inter XH3 .. XHn                                     | H33A ..H35B       | .                           | 1.96 Ang.     |
|                   |                                                            | 1-y,1/2+x,1-z =   | 8_666                       | Check         |
| PLAT413_ALERT_2_G | Short Inter XH3 .. XHn                                     | H33A ..H35C       | .                           | 2.14 Ang.     |
|                   |                                                            | 1-y,1/2+x,1-z =   | 8_666                       | Check         |
| PLAT605_ALERT_4_G | Largest Solvent Accessible VOID in the Structure           |                   |                             | 147 A**3      |
| PLAT720_ALERT_4_G | Number of Unusual/Non-Standard Labels .....                |                   |                             | 5 Note        |
|                   | A100 H2AA H2AB H2BC H2BD                                   |                   |                             |               |
| PLAT721_ALERT_1_G | Bond Calc                                                  | 1.00000, Rep      | 0.98020 Dev...              | 0.02 Ang.     |
|                   | C1 -H1C                                                    | 1_555 1_555 ..... | #                           | 197 Check     |
| PLAT721_ALERT_1_G | Bond Calc                                                  | 1.00000, Rep      | 0.98020 Dev...              | 0.02 Ang.     |
|                   | C3 -H3C                                                    | 1_555 1_555 ..... | #                           | 239 Check     |
| PLAT722_ALERT_1_G | Angle Calc                                                 | 108.00, Rep       | 109.40 Dev...               | 1.40 Degree   |
|                   | H1A -C1 -H1C                                               | 1_555 1_555 1_555 | #                           | 437 Check     |
| PLAT722_ALERT_1_G | Angle Calc                                                 | 108.00, Rep       | 109.50 Dev...               | 1.50 Degree   |
|                   | H1B -C1 -H1C                                               | 1_555 1_555 1_555 | #                           | 438 Check     |
| PLAT722_ALERT_1_G | Angle Calc                                                 | 110.00, Rep       | 108.30 Dev...               | 1.70 Degree   |
|                   | C2 -C1 -H1A                                                | 1_555 1_555 1_555 | #                           | 439 Check     |
| PLAT722_ALERT_1_G | Angle Calc                                                 | 111.00, Rep       | 109.80 Dev...               | 1.20 Degree   |
|                   | C2 -C1 -H1B                                                | 1_555 1_555 1_555 | #                           | 440 Check     |
| PLAT722_ALERT_1_G | Angle Calc                                                 | 111.00, Rep       | 109.50 Dev...               | 1.50 Degree   |
|                   | H3A -C3 -H3B                                               | 1_555 1_555 1_555 | #                           | 523 Check     |
| PLAT722_ALERT_1_G | Angle Calc                                                 | 108.00, Rep       | 109.40 Dev...               | 1.40 Degree   |
|                   | H3B -C3 -H3C                                               | 1_555 1_555 1_555 | #                           | 525 Check     |
| PLAT794_ALERT_5_G | Tentative Bond Valency for Pb1                             | (II)              | .                           | 2.02 Info     |
| PLAT794_ALERT_5_G | Tentative Bond Valency for Pb3                             | (II)              | .                           | 2.03 Info     |
| PLAT794_ALERT_5_G | Tentative Bond Valency for Al                              | (III)             | .                           | 2.75 Info     |
| PLAT794_ALERT_5_G | Tentative Bond Valency for Al1                             | (III)             | .                           | 2.77 Info     |
| PLAT794_ALERT_5_G | Tentative Bond Valency for Al00                            | (III)             | .                           | 2.75 Info     |
| PLAT794_ALERT_5_G | Tentative Bond Valency for Al3                             | (III)             | .                           | 2.82 Info     |
| PLAT794_ALERT_5_G | Tentative Bond Valency for Al4                             | (III)             | .                           | 2.73 Info     |
| PLAT794_ALERT_5_G | Tentative Bond Valency for Al5                             | (III)             | .                           | 2.99 Info     |
| PLAT794_ALERT_5_G | Tentative Bond Valency for Al6                             | (III)             | .                           | 2.81 Info     |
| PLAT802_ALERT_4_G | CIF Input Record(s) with more than 80 Characters           |                   |                             | 4 Info        |
| PLAT860_ALERT_3_G | Number of Least-Squares Restraints .....                   |                   |                             | 281 Note      |
| PLAT868_ALERT_4_G | ALERTS Due to the Use of _smtbx_masks Suppressed           |                   |                             | ! Info        |
| PLAT910_ALERT_3_G | Missing # of FCF Reflection(s) Below Theta(Min).           |                   |                             | 2 Note        |
|                   | 1 1 0, 0 0 1,                                              |                   |                             |               |
| PLAT913_ALERT_3_G | Missing # of Very Strong Reflections in FCF ....           |                   |                             | 2 Note        |
|                   | 1 1 0, 0 0 1,                                              |                   |                             |               |
| PLAT933_ALERT_2_G | Number of HKL-OMIT Records in Embedded .res File           |                   |                             | 40 Note       |
|                   | 0 1 2, 3 7 1, -2 6 3, -3 4 2, 3 4 4, -4 5 1,               |                   |                             |               |
|                   | -3 7 7, -2 8 10, -2 4 1, -1 9 2, 1 8 4, -2 5 4,            |                   |                             |               |
|                   | -1 8 9, -5 9 5, -1 8 6, -4 9 5, -1 13 2, 4 11 1,           |                   |                             |               |
|                   | 1 9 1, 0 4 6, -1 2 5, -4 5 4, -8 12 3, 3 7 6,              |                   |                             |               |
|                   | 6 6 2, -7 12 6, 0 5 5, -5 9 0, -1 5 4, 7 13 7,             |                   |                             |               |
|                   | 1 6 1, 2 4 1, -3 14 3, -6 11 4, 10 10 6, 6 12 2,           |                   |                             |               |
|                   | 1 10 9, 8 10 1, 0 12 0, 4 4 9,                             |                   |                             |               |
| PLAT941_ALERT_3_G | Average HKL Measurement Multiplicity .....                 |                   |                             | 3.5 Low       |
| PLAT951_ALERT_5_G | Calculated (ThMax) and CIF-Reported Kmax Differ            |                   |                             | 2 Units       |
| PLAT969_ALERT_5_G | The 'Henn et al.' R-Factor-gap value .....                 |                   |                             | 5.412 Note    |
|                   | Predicted wR2: Based on SigI**2 4.66 or SHELX Weight 24.81 |                   |                             |               |
| PLAT978_ALERT_2_G | Number C-C Bonds with Positive Residual Density.           |                   |                             | 0 Info        |
| PLAT984_ALERT_1_G | The C-f' =                                                 | 0.0147            | Deviates from the B&C-Value | 0.0137 Check  |
| PLAT984_ALERT_1_G | The N-f' =                                                 | 0.0253            | Deviates from the B&C-Value | 0.0241 Check  |
| PLAT984_ALERT_1_G | The O-f' =                                                 | 0.0412            | Deviates from the B&C-Value | 0.0389 Check  |
| PLAT984_ALERT_1_G | The Pb-f' =                                                | -4.2646           | Deviates from the B&C-Value | -4.4950 Check |
| PLAT985_ALERT_1_G | The Al-f" =                                                | 0.1843            | Deviates from the B&C-Value | 0.1873 Check  |

|                              |        |                             |        |       |
|------------------------------|--------|-----------------------------|--------|-------|
| PLAT985_ALERT_1_G The Pb-f"= | 7.1982 | Deviates from the B&C-Value | 6.8412 | Check |
| PLAT985_ALERT_1_G The S-f"=  | 0.4242 | Deviates from the B&C-Value | 0.4295 | Check |

---

2 **ALERT level A** = Most likely a serious problem - resolve or explain  
3 **ALERT level B** = A potentially serious problem, consider carefully  
41 **ALERT level C** = Check. Ensure it is not caused by an omission or oversight  
70 **ALERT level G** = General information/check it is not something unexpected

19 ALERT type 1 CIF construction/syntax error, inconsistent or missing data  
55 ALERT type 2 Indicator that the structure model may be wrong or deficient  
19 ALERT type 3 Indicator that the structure quality may be low  
11 ALERT type 4 Improvement, methodology, query or suggestion  
12 ALERT type 5 Informative message, check

---

## checkCIF publication errors

---

### Alert level A

PUBL004\_ALERT\_1\_A The contact author's name and address are missing,  
\_publ\_contact\_author\_name and \_publ\_contact\_author\_address.  
PUBL005\_ALERT\_1\_A \_publ\_contact\_author\_email, \_publ\_contact\_author\_fax and  
\_publ\_contact\_author\_phone are all missing.  
At least one of these should be present.  
PUBL006\_ALERT\_1\_A \_publ\_requested\_journal is missing  
e.g. 'Acta Crystallographica Section C'  
PUBL008\_ALERT\_1\_A \_publ\_section\_title is missing. Title of paper.  
PUBL009\_ALERT\_1\_A \_publ\_author\_name is missing. List of author(s) name(s).  
PUBL010\_ALERT\_1\_A \_publ\_author\_address is missing. Author(s) address(es).  
PUBL012\_ALERT\_1\_A \_publ\_section\_abstract is missing.  
Abstract of paper in English.

---

7 **ALERT level A** = Data missing that is essential or data in wrong format  
0 **ALERT level G** = General alerts. Data that may be required is missing

---

## Publication of your CIF

You should attempt to resolve as many as possible of the alerts in all categories. Often the minor alerts point to easily fixed oversights, errors and omissions in your CIF or refinement strategy, so attention to these fine details can be worthwhile. In order to resolve some of the more serious problems it may be necessary to carry out additional measurements or structure refinements. However, the nature of your study may justify the reported deviations from journal submission requirements and the more serious of these should be commented upon in the discussion or experimental section of a paper or in the "special\_details" fields of the CIF. *checkCIF* was carefully designed to identify outliers and unusual parameters, but every test has its limitations and alerts that are not important in a particular case may appear. Conversely, the absence of alerts does not guarantee there are no aspects of the results needing attention. It is up to the individual to critically assess their own results and, if necessary, seek expert advice.

If level A alerts remain, which you believe to be justified deviations, and you intend to submit this CIF for publication in a journal, you should additionally insert an explanation in your CIF using the Validation Reply Form (VRF) below. This will allow your explanation to be considered as part of the review process.

## Validation response form

Please find below a validation response form (VRF) that can be filled in and pasted into your CIF.

```
# start Validation Reply Form
_vrf_PUBL004_GLOBAL
;
PROBLEM: The contact author's name and address are missing,
RESPONSE: ...
;
_vrf_PUBL005_GLOBAL
;
PROBLEM: _publ_contact_author_email, _publ_contact_author_fax and
RESPONSE: ...
;
_vrf_PUBL006_GLOBAL
;
PROBLEM: _publ_requested_journal is missing
RESPONSE: ...
;
_vrf_PUBL008_GLOBAL
;
PROBLEM: _publ_section_title is missing. Title of paper.
RESPONSE: ...
;
_vrf_PUBL009_GLOBAL
;
PROBLEM: _publ_author_name is missing. List of author(s) name(s).
RESPONSE: ...
;
_vrf_PUBL010_GLOBAL
;
PROBLEM: _publ_author_address is missing. Author(s) address(es).
```

```

RESPONSE: ...
;
_vrf_PUBL012_GLOBAL
;
PROBLEM: _publ_section_abstract is missing.
RESPONSE: ...
;
# end Validation Reply Form

```

If you wish to submit your CIF for publication in Acta Crystallographica Section C or E, you should upload your CIF via the web. If you wish to submit your CIF for publication in IUCrData you should upload your CIF via the web. If your CIF is to form part of a submission to another IUCr journal, you will be asked, either during electronic submission or by the Co-editor handling your paper, to upload your CIF via our web site.

---

**PLATON version of 15/07/2024; check.def file version of 15/07/2024**

Datablock SALOC-1@G3 - ellipsoid plot

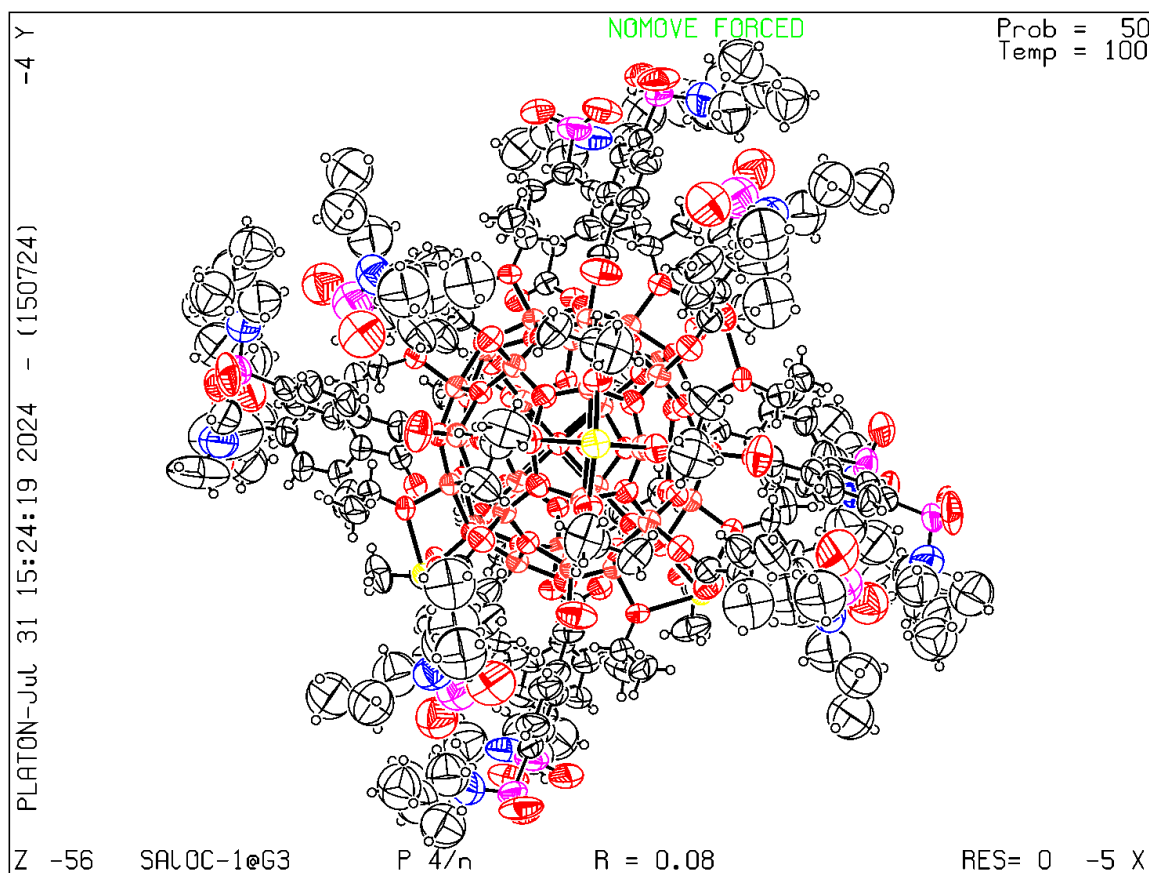

Supplement: Supplementary file 9 [file 57e6607a1ad294d9069d0558.pdf]
