# Supplementary material for: Precise Nanochemistry of Spherical Aluminum Oxo Clusters for Accurate Surface Guest Recognition and Release
Source: Research Square preprint supplement (doi:10.21203/rs.3.rs-4948547/v1), 2024-11-06

## checkCIF/PLATON report

Structure factors have been supplied for datablock(s) SAIOC-1@G8

THIS REPORT IS FOR GUIDANCE ONLY. IF USED AS PART OF A REVIEW PROCEDURE FOR PUBLICATION, IT SHOULD NOT REPLACE THE EXPERTISE OF AN EXPERIENCED CRYSTALLOGRAPHIC REFEREE.

No syntax errors found.      CIF dictionary      Interpreting this report

### Datablock: SAIOC-1@G8

---

|                        |                                                                         |                                                              |                           |
|------------------------|-------------------------------------------------------------------------|--------------------------------------------------------------|---------------------------|
| Bond precision:        | C-C = 0.0342 Å                                                          | Wavelength=1.34050                                           |                           |
| Cell:                  | a=30.0958 (6)<br>alpha=90                                               | b=30.0958 (6)<br>beta=90                                     | c=19.3547 (5)<br>gamma=90 |
| Temperature:           | 113 K                                                                   |                                                              |                           |
|                        | Calculated                                                              | Reported                                                     |                           |
| Volume                 | 17530.7 (8)                                                             | 17530.7 (8)                                                  |                           |
| Space group            | P 4/n                                                                   | P 4/n                                                        |                           |
| Hall group             | -P 4a                                                                   | -P 4a                                                        |                           |
| Moiety formula         | C216 H364 Al32 N12 O110 Pb6<br>S12, 2 (C7 H7 O), 3 (C7 H8 O)<br>[+ solv | C216 H364 Al32 N12 O110 Pb6<br>S12, 3 (C7 H8 O), 2 (C7 H7 O) |                           |
| Sum formula            | C251 H402 Al32 N12 O115 Pb6<br>S12 [+ solvent]                          | C251 H402 Al32 N12 O115 Pb6<br>S12                           |                           |
| Mr                     | 7919.15                                                                 | 7919.04                                                      |                           |
| Dx, g cm <sup>-3</sup> | 1.500                                                                   | 1.500                                                        |                           |
| Z                      | 2                                                                       | 2                                                            |                           |
| Mu (mm <sup>-1</sup> ) | 5.083                                                                   | 5.225                                                        |                           |
| F000                   | 8024.0                                                                  | 8024.0                                                       |                           |
| F000'                  | 8003.89                                                                 |                                                              |                           |
| h, k, lmax             | 35, 35, 22                                                              | 34, 35, 22                                                   |                           |
| Nref                   | 14970                                                                   | 14853                                                        |                           |
| Tmin, Tmax             |                                                                         | 1.000, 1.000                                                 |                           |
| Tmin'                  |                                                                         |                                                              |                           |

Correction method= # Reported T Limits: Tmin=1.000 Tmax=1.000  
AbsCorr = SPHERE

Data completeness= 0.992

Theta (max)= 52.048

R(reflections)= 0.1076( 9225)

wR2(reflections)=  
0.3415( 14853)

S = 1.077

Npar= 985

---

The following ALERTS were generated. Each ALERT has the format  
**test-name\_ALERT\_alert-type\_alert-level**.  
Click on the hyperlinks for more details of the test.

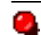

#### **Alert level A**

PLAT971\_ALERT\_2\_A Check Calcd Resid. Dens. 0.90Ang From Pb2

4.36 eA-3

**Author Response:** These alerts are generated because of residual density peaks near the heaviest atoms in the structure, due to fourier termination ripples. After inspection, the residual electron density peak does not make chemical sense and will not affect the correct identification of the structure.

PLAT971\_ALERT\_2\_A Check Calcd Resid. Dens. 0.92Ang From Pb1

4.01 eA-3

**Author Response:** These alerts are generated because of residual density peaks near the heaviest atoms in the structure, due to fourier termination ripples. After inspection, the residual electron density peak does not make chemical sense and will not affect the correct identification of the structure.

PLAT971\_ALERT\_2\_A Check Calcd Resid. Dens. 0.94Ang From Pb2

3.73 eA-3

**Author Response:** These alerts are generated because of residual density peaks near the heaviest atoms in the structure, due to fourier termination ripples. After inspection, the residual electron density peak does not make chemical sense and will not affect the correct identification of the structure.

PLAT973\_ALERT\_2\_A Check Calcd Positive Resid. Density on

Pb1

5.57 eA-3

**Author Response:** These alerts are generated because of residual density peaks near the heaviest atoms in the structure, due to fourier termination ripples. After inspection, the residual electron density peak does not make chemical sense and will not affect the correct identification of the structure.

PLAT973\_ALERT\_2\_A Check Calcd Positive Resid. Density on

Pb2

5.26 eA-3

**Author Response:** These alerts are generated because of residual density peaks near the heaviest atoms in the structure, due to fourier termination ripples. After inspection, the residual electron density peak does not make chemical sense and will not affect the correct identification of the structure.

PLAT973\_ALERT\_2\_A Check Calcd Positive Resid. Density on Pb3 3.77 eA-3

**Author Response:** These alerts are generated because of residual density peaks near the heaviest atoms in the structure, due to fourier termination ripples. After inspection, the residual electron density peak does not make chemical sense and will not affect the correct identification of the structure.

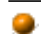

**Alert level B**

PLAT241\_ALERT\_2\_B High 'MainMol' Ueq as Compared to Neighbors of C13 Check

**Author Response:** These alerts are generated because of a slight unresolved disorder caused by free rotation of the flexible chain at the end of the ligand. Some refi commands such as DELU, SIMU and ISOR were used to address such abnormal Ueq value, but failed. After inspection, this does not affect the correct assign of atom types.

PLAT241\_ALERT\_2\_B High 'MainMol' Ueq as Compared to Neighbors of C53 Check

**Author Response:** These alerts are generated because of a slight unresolved disorder caused by free rotation of the flexible chain at the end of the ligand. Some refi commands such as DELU, SIMU and ISOR were used to address such abnormal Ueq value, but failed. After inspection, this does not affect the correct assign of atom types.

PLAT242\_ALERT\_2\_B Low 'MainMol' Ueq as Compared to Neighbors of N1 Check

**Author Response:** These alerts are generated because of a slight unresolved disorder caused by free rotation of the flexible chain at the end of the ligand. Some refi commands such as DELU, SIMU and ISOR were used to address such abnormal Ueq value, but failed. After inspection, this does not affect the correct assign of atom types.

PLAT242\_ALERT\_2\_B Low 'MainMol' Ueq as Compared to Neighbors of N3 Check

**Author Response:** These alerts are generated because of a slight unresolved disorder caused by free rotation of the flexible chain at the end of the ligand. Some refi commands such as DELU, SIMU and ISOR were used to address such abnormal Ueq value, but failed. After inspection, this does not affect the correct assign of atom types.

PLAT242\_ALERT\_2\_B Low 'MainMol' Ueq as Compared to Neighbors of C18 Check

**Author Response:** These alerts are generated because of a slight unresolved disorder caused by free rotation of the flexible chain at the end of the ligand. Some refi commands such as DELU, SIMU and ISOR were used to address such abnormal Ueq value, but failed. After inspection, this does not affect the correct assign of atom types.

PLAT342\_ALERT\_3\_B Low Bond Precision on C-C Bonds ..... 0.03417 Ang.

**Author Response:** These alerts are generated because of a slight unresolved disorder caused by free rotation of the flexible chain at the end of the ligand. Some refi commands such as DELU, SIMU and ISOR were used to address such abnormal Ueq value, but failed. After inspection, this does not affect the correct assign of atom types.

PLAT971\_ALERT\_2\_B Check Calcd Resid. Dens. 1.20Ang From Pb2 3.49 eA-3

**Author Response:** These alerts are generated because of residual density peaks near the heaviest atoms in the structure, due to fourier termination ripples. After inspection, the residual electron density peak does not make chemical sense and will not affect the correct identification of the structure.

PLAT971\_ALERT\_2\_B Check Calcd Resid. Dens. 1.10Ang From Pb3 3.48 eA-3

**Author Response:** These alerts are generated because of residual density peaks near the heaviest atoms in the structure, due to fourier termination ripples. After inspection, the residual electron density peak does not make chemical sense and will not affect the correct identification of the structure.

PLAT971\_ALERT\_2\_B Check Calcd Resid. Dens. 0.94Ang From Pb2 3.22 eA-3

**Author Response:** These alerts are generated because of residual density peaks near the heaviest atoms in the structure, due to fourier termination ripples. After inspection, the residual electron density peak does not make chemical sense and will not affect the correct identification of the structure.

PLAT971\_ALERT\_2\_B Check Calcd Resid. Dens. 0.97Ang From Pb3 2.83 eA-3

**Author Response:** These alerts are generated because of residual density peaks near the heaviest atoms in the structure, due to fourier termination ripples. After inspection, the residual electron density peak does not make chemical sense and will not affect the correct identification of the structure.

PLAT971\_ALERT\_2\_B Check Calcd Resid. Dens. 1.20Ang From Pb1 2.82 eA-3

**Author Response:** These alerts are generated because of residual density peaks near the heaviest atoms in the structure, due to fourier termination ripples. After inspection, the residual electron density peak does not make chemical sense and will not affect the correct identification of the structure.

PLAT971\_ALERT\_2\_B Check Calcd Resid. Dens. 1.14Ang From Pb1 2.81 eA-3

**Author Response:** These alerts are generated because of residual density peaks near the heaviest atoms in the structure, due to fourier termination ripples. After inspection, the residual electron density peak does not make chemical sense and will not affect the correct identification of the structure.

PLAT971\_ALERT\_2\_B Check Calcd Resid. Dens. 0.97Ang From Pb2 2.74 eA-3

**Author Response:** These alerts are generated because of residual density peaks near the heaviest atoms in the structure, due to fourier termination ripples. After inspection, the residual electron density peak does not make chemical sense and will not affect the correct identification of the structure.

PLAT971\_ALERT\_2\_B Check Calcd Resid. Dens. 1.03Ang From Pb2 2.60 eA-3

**Author Response:** These alerts are generated because of residual density peaks near the heaviest atoms in the structure, due to fourier termination ripples. After inspection, the residual electron density peak does not make chemical sense and will not affect the correct identification of the structure.

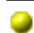

#### Alert level C

RADNW01\_ALERT\_1\_C The radiation wavelength lies outside the expected range  
for the supplied radiation type. Expected range 1.34130-1.34150  
Wavelength given = 1.34050

THETM01\_ALERT\_3\_C The value of sine(theta\_max)/wavelength is less than 0.590  
Calculated sin(theta\_max)/wavelength = 0.5882

PLAT082\_ALERT\_2\_C High R1 Value ..... 0.11 Report

PLAT084\_ALERT\_3\_C High wR2 Value (i.e. > 0.25) ..... 0.34 Report

PLAT094\_ALERT\_2\_C Ratio of Maximum / Minimum Residual Density .... 3.62 Report

PLAT213\_ALERT\_2\_C Atom O5 has ADP max/min Ratio ..... 3.5 prolat

PLAT220\_ALERT\_2\_C NonSolvent Resd 1 C Ueq(max)/Ueq(min) Range 4.3 Ratio

PLAT220\_ALERT\_2\_C NonSolvent Resd 1 O Ueq(max)/Ueq(min) Range 4.4 Ratio

PLAT222\_ALERT\_3\_C NonSolvent Resd 1 H Uiso(max)/Uiso(min) Range 6.1 Ratio

PLAT241\_ALERT\_2\_C High 'MainMol' Ueq as Compared to Neighbors of 024 Check

**Author Response:** These alerts are generated because of a slight unresolved disorder caused by free rotation of the flexible chain at the end of the ligand. Some refi commands such as DELU, SIMU and ISOR were used to address such abnormal Ueq value, but failed. After inspection, this does not affect the correct assign of atom types.

PLAT241\_ALERT\_2\_C High 'MainMol' Ueq as Compared to Neighbors of C14 Check

**Author Response:** These alerts are generated because of a slight unresolved disorder caused by free rotation of the flexible chain at the end of the ligand. Some refi commands such as DELU, SIMU and ISOR were used to address such abnormal Ueq value, but failed. After inspection, this does not affect the correct assign of atom types.

PLAT241\_ALERT\_2\_C High 'MainMol' Ueq as Compared to Neighbors of C32 Check

**Author Response:** These alerts are generated because of a slight unresolved disorder caused by free rotation of the flexible chain at the end of the ligand. Some refi commands such as DELU, SIMU and ISOR were used to address such abnormal Ueq value, but failed. After inspection, this does not affect the correct assign of atom types.

PLAT241\_ALERT\_2\_C High 'MainMol' Ueq as Compared to Neighbors of C46 Check

**Author Response:** These alerts are generated because of a slight unresolved disorder caused by free rotation of the flexible chain at the end of the ligand. Some refi commands such as DELU, SIMU and ISOR were used to address such abnormal Ueq value, but failed. After inspection, this does not affect the correct assign of atom types.

PLAT241\_ALERT\_2\_C High 'MainMol' Ueq as Compared to Neighbors of C52 Check

**Author Response:** These alerts are generated because of a slight unresolved disorder caused by free rotation of the flexible chain at the end of the ligand. Some refi commands such as DELU, SIMU and ISOR were used to address such abnormal Ueq value, but failed. After inspection, this does not affect the correct assign of atom types.

PLAT242\_ALERT\_2\_C Low 'MainMol' Ueq as Compared to Neighbors of S1 Check

**Author Response:** These alerts are generated because of a slight unresolved disorder caused by free rotation of the flexible chain at the end of the ligand. Some refi commands such as DELU, SIMU and ISOR were used to address such abnormal Ueq value, but failed. After inspection, this does not affect the correct assign of atom types.

PLAT242\_ALERT\_2\_C Low 'MainMol' Ueq as Compared to Neighbors of S3 Check

**Author Response:** These alerts are generated because of a slight unresolved disorder caused by free rotation of the flexible chain at the end of the ligand. Some refi commands such as DELU, SIMU and ISOR were used to address such abnormal Ueq value, but failed. After inspection, this does not affect the correct assign of atom types.

PLAT242\_ALERT\_2\_C Low 'MainMol' Ueq as Compared to Neighbors of C21 Check

**Author Response:** These alerts are generated because of a slight unresolved disorder caused by free rotation of the flexible chain at the end of the ligand. Some refi commands such as DELU, SIMU and ISOR were used to address such abnormal Ueq value, but failed. After inspection, this does not affect the correct assign of atom types.

PLAT242\_ALERT\_2\_C Low 'MainMol' Ueq as Compared to Neighbors of C24 Check

**Author Response:** These alerts are generated because of a slight unresolved disorder caused by free rotation of the flexible chain at the end of the ligand. Some refi commands such as DELU, SIMU and ISOR were used to address such abnormal Ueq value, but failed. After inspection, this does not affect the correct assign of atom types.

PLAT242\_ALERT\_2\_C Low 'MainMol' Ueq as Compared to Neighbors of C40 Check

**Author Response:** These alerts are generated because of a slight unresolved disorder caused by free rotation of the flexible chain at the end of the ligand. Some refi commands such as DELU, SIMU and ISOR were used to address such abnormal Ueq value, but failed. After inspection, this does not affect the correct assign of atom types.

PLAT242\_ALERT\_2\_C Low 'MainMol' Ueq as Compared to Neighbors of C44 Check

**Author Response:** These alerts are generated because of a slight unresolved disorder caused by free rotation of the flexible chain at the end of the ligand. Some refi commands such as DELU, SIMU and ISOR were used to address such abnormal Ueq value, but failed. After inspection, this does not affect the correct assign of atom types.

```

PLAT260_ALERT_2_C Large Average Ueq of Residue Including Pb1 0.119 Check
PLAT260_ALERT_2_C Large Average Ueq of Residue Including O30 0.117 Check
PLAT260_ALERT_2_C Large Average Ueq of Residue Including O31 0.160 Check
PLAT412_ALERT_2_C Short Intra XH3 .. XHn H50B ..H52B . 1.88 Ang.
                                x,y,z = 1_555 Check
PLAT905_ALERT_3_C Negative K value in the Analysis of Variance ... -4.360 Report
PLAT911_ALERT_3_C Missing FCF Refl Between Thmin & STh/L= 0.588 117 Report
-1 3 0, -2 4 0, -16 18 0, 22 22 0, 23 23 0, -9 25 0,
 1 25 0, 3 31 0, -12 32 0, -4 32 0, 14 32 0, 0 0 1,
-2 3 1, 1 4 1, -2 5 1, -3 7 1, -3 8 1, 20 22 1,
21 22 1, -10 23 1, -2 24 1, 12 25 1, -14 27 1, -3 28 1,
-16 30 1, -15 31 1, -14 31 1, -12 32 1, -11 32 1, -1 32 1,
 4 34 1, 0 1 2, -1 2 2, -1 5 2, 2 7 2, -12 20 2,
13 21 2, 4 34 2, 19 19 3, 14 24 3, -9 25 3, -10 27 3,
-15 28 3, 1 29 3, 2 29 3, 11 31 3, -2 32 3, -20 22 4,
-2 23 4, -8 24 4, -21 27 4, 1 28 4, 2 28 4, 3 28 4,
-17 29 4, 8 29 4, 2 32 4, 6 33 4, 0 2 5, 11 19 5,
17 21 5, 0 22 5, -19 25 5, -12 25 5, -9 25 5, 13 25 5,
 4 27 5, 1 29 5, 0 30 5, 3 31 5, -11 15 6, 8 17 6,
-18 19 6, 19 19 6, 18 20 6, -20 22 6, -17 23 6, -13 23 6,
-16 24 6, -8 27 6, 1 27 6, 0 28 6, 1 29 6, -11 15 7,
 9 16 7, 10 16 7, 17 17 7, -16 18 7, 16 18 7, -20 21 7,
-11 21 7, -18 22 7, 11 22 7, -2 23 7, -16 24 7, -8 26 7,
PLAT971_ALERT_2_C Check Calcd Resid. Dens. 1.08Ang From S1 2.39 eA-3

```

**Author Response:** These alerts are generated because of residual density peaks near the heaviest atoms in the structure, due to fourier termination ripples. After inspection, the residual electron density peak does not make chemical sense and will not affect the correct identification of the structure.

```

PLAT971_ALERT_2_C Check Calcd Resid. Dens. 1.03Ang From Pb3 2.02 eA-3

```

**Author Response:** These alerts are generated because of residual density peaks near the heaviest atoms in the structure, due to fourier termination ripples. After inspection, the residual electron density peak does not make chemical sense and will not affect the correct identification of the structure.

```

PLAT971_ALERT_2_C Check Calcd Resid. Dens. 1.87Ang From C15 1.95 eA-3

```

**Author Response:** These alerts are generated because of residual density peaks near the heaviest atoms in the structure, due to fourier termination ripples. After inspection, the residual electron density peak does not make chemical sense and will not affect the correct identification of the structure.



|                   |                                          |                 |            |
|-------------------|------------------------------------------|-----------------|------------|
| PLAT972_ALERT_2_C | Check Calcd Resid. Dens.                 | 1.99Ang From O8 | -1.61 eA-3 |
| PLAT975_ALERT_2_C | Check Calcd Resid. Dens.                 | 1.08Ang From O8 | 1.49 eA-3  |
| PLAT977_ALERT_2_C | Check Negative Difference Density on H66 |                 | -0.37 eA-3 |

## Alert level G

|                   |                                                                                    |                |            |
|-------------------|------------------------------------------------------------------------------------|----------------|------------|
| ABSMU01_ALERT_1_G | Calculation of _exptl_absorpt_correction_mu not performed for this radiation type. |                |            |
| PLAT002_ALERT_2_G | Number of Distance or Angle Restraints on AtSite                                   | 17             | Note       |
| PLAT003_ALERT_2_G | Number of Uiso or U(i,j) Restrained non-H Atoms                                    | 24             | Report     |
| PLAT007_ALERT_5_G | Number of Unrefined Donor-H Atoms .....                                            | 2              | Report     |
|                   | H9 H23                                                                             |                |            |
| PLAT042_ALERT_1_G | Calc. and Reported MoietyFormula Strings Differ                                    | Please         | Check      |
|                   | Calc.: C216 H364 Al32 N12 O110 Pb6 S12, 2(C7 H7 O), 3(C7 H8 O)                     |                |            |
|                   | Rep.: C216 H364 Al32 N12 O110 Pb6 S12, 3(C7 H8 O), 2(C7 H7 O)                      |                |            |
| PLAT051_ALERT_1_G | Mu(calc) and Mu(CIF) Ratio Differs from 1.0 by .                                   | 2.72           | %          |
| PLAT072_ALERT_2_G | SHELXL First Parameter in WGHT Unusually Large                                     | 0.16           | Report     |
| PLAT083_ALERT_2_G | SHELXL Second Parameter in WGHT Unusually Large                                    | 251.03         | Why ?      |
| PLAT172_ALERT_4_G | The CIF-Embedded .res File Contains DFIX Records                                   | 15             | Report     |
| PLAT177_ALERT_4_G | The CIF-Embedded .res File Contains DELU Records                                   | 5              | Report     |
| PLAT178_ALERT_4_G | The CIF-Embedded .res File Contains SIMU Records                                   | 5              | Report     |
| PLAT186_ALERT_4_G | The CIF-Embedded .res File Contains ISOR Records                                   | 3              | Report     |
| PLAT187_ALERT_4_G | The CIF-Embedded .res File Contains RIGU Records                                   | 1              | Report     |
| PLAT188_ALERT_3_G | A Non-default SIMU Restraint Value has been used                                   | 0.0100         | Report     |
| PLAT188_ALERT_3_G | A Non-default SIMU Restraint Value has been used                                   | 0.0100         | Report     |
| PLAT188_ALERT_3_G | A Non-default SIMU Restraint Value has been used                                   | 0.0100         | Report     |
| PLAT188_ALERT_3_G | A Non-default SIMU Restraint Value has been used                                   | 0.0100         | Report     |
| PLAT188_ALERT_3_G | A Non-default SIMU Restraint Value has been used                                   | 0.0010         | Report     |
| PLAT190_ALERT_3_G | A Non-default RIGU Restraint Value for First Par                                   | 0.0100         | Report     |
| PLAT190_ALERT_3_G | A Non-default RIGU Restraint Value for SecondPar                                   | 0.0200         | Report     |
| PLAT192_ALERT_3_G | A Non-default DELU Restraint Value for SecondPar                                   | 0.0200         | Report     |
| PLAT192_ALERT_3_G | A Non-default DELU Restraint Value for SecondPar                                   | 0.0200         | Report     |
| PLAT192_ALERT_3_G | A Non-default DELU Restraint Value for SecondPar                                   | 0.0200         | Report     |
| PLAT192_ALERT_3_G | A Non-default DELU Restraint Value for SecondPar                                   | 0.0200         | Report     |
| PLAT192_ALERT_3_G | A Non-default DELU Restraint Value for First Par                                   | 0.0010         | Report     |
| PLAT192_ALERT_3_G | A Non-default DELU Restraint Value for SecondPar                                   | 0.0020         | Report     |
| PLAT299_ALERT_4_G | Atom Site Occupancy Constrained at .....                                           | 0.5            | Check      |
|                   | O30 C57 C58 C59 C60 C61 C62                                                        | C63            |            |
|                   | H57A H57B H57C H60 H61 H62 H63                                                     |                |            |
| PLAT300_ALERT_4_G | Atom Site Occupancy of C34                                                         | Constrained at | 0.75 Check |
| PLAT300_ALERT_4_G | Atom Site Occupancy of C33                                                         | Constrained at | 0.25 Check |
| PLAT300_ALERT_4_G | Atom Site Occupancy of H34A                                                        | Constrained at | 0.75 Check |
| PLAT300_ALERT_4_G | Atom Site Occupancy of H34B                                                        | Constrained at | 0.75 Check |
| PLAT300_ALERT_4_G | Atom Site Occupancy of H34C                                                        | Constrained at | 0.75 Check |
| PLAT300_ALERT_4_G | Atom Site Occupancy of H35A                                                        | Constrained at | 0.75 Check |
| PLAT300_ALERT_4_G | Atom Site Occupancy of H35B                                                        | Constrained at | 0.75 Check |
| PLAT300_ALERT_4_G | Atom Site Occupancy of H33A                                                        | Constrained at | 0.25 Check |
| PLAT300_ALERT_4_G | Atom Site Occupancy of H33B                                                        | Constrained at | 0.25 Check |
| PLAT300_ALERT_4_G | Atom Site Occupancy of H33C                                                        | Constrained at | 0.25 Check |
| PLAT300_ALERT_4_G | Atom Site Occupancy of H35C                                                        | Constrained at | 0.25 Check |
| PLAT300_ALERT_4_G | Atom Site Occupancy of H35D                                                        | Constrained at | 0.25 Check |
| PLAT300_ALERT_4_G | Atom Site Occupancy of O31                                                         | Constrained at | 0.75 Check |
| PLAT300_ALERT_4_G | Atom Site Occupancy of C64                                                         | Constrained at | 0.75 Check |
| PLAT300_ALERT_4_G | Atom Site Occupancy of C65                                                         | Constrained at | 0.75 Check |
| PLAT300_ALERT_4_G | Atom Site Occupancy of C66                                                         | Constrained at | 0.75 Check |
| PLAT300_ALERT_4_G | Atom Site Occupancy of C67                                                         | Constrained at | 0.75 Check |

|                   |                                                  |                         |         |           |
|-------------------|--------------------------------------------------|-------------------------|---------|-----------|
| PLAT300_ALERT_4_G | Atom Site Occupancy of C68                       | Constrained at          | 0.75    | Check     |
| PLAT300_ALERT_4_G | Atom Site Occupancy of C69                       | Constrained at          | 0.75    | Check     |
| PLAT300_ALERT_4_G | Atom Site Occupancy of C70                       | Constrained at          | 0.75    | Check     |
| PLAT300_ALERT_4_G | Atom Site Occupancy of H64A                      | Constrained at          | 0.75    | Check     |
| PLAT300_ALERT_4_G | Atom Site Occupancy of H64B                      | Constrained at          | 0.75    | Check     |
| PLAT300_ALERT_4_G | Atom Site Occupancy of H64C                      | Constrained at          | 0.75    | Check     |
| PLAT300_ALERT_4_G | Atom Site Occupancy of H65                       | Constrained at          | 0.75    | Check     |
| PLAT300_ALERT_4_G | Atom Site Occupancy of H66                       | Constrained at          | 0.75    | Check     |
| PLAT300_ALERT_4_G | Atom Site Occupancy of H67                       | Constrained at          | 0.75    | Check     |
| PLAT300_ALERT_4_G | Atom Site Occupancy of H68                       | Constrained at          | 0.75    | Check     |
| PLAT300_ALERT_4_G | Atom Site Occupancy of H70                       | Constrained at          | 0.75    | Check     |
| PLAT301_ALERT_3_G | Main Residue Disorder .....                      | (Resd 1)                | 1%      | Note      |
| PLAT302_ALERT_4_G | Anion/Solvent/Minor-Residue Disorder             | (Resd 2)                | 100%    | Note      |
| PLAT302_ALERT_4_G | Anion/Solvent/Minor-Residue Disorder             | (Resd 3)                | 100%    | Note      |
| PLAT304_ALERT_4_G | Non-Integer Number of Atoms in .....             | (Resd 2)                | 7.50    | Check     |
| PLAT413_ALERT_2_G | Short Inter XH3 .. XHn                           | H11A ..H33C             | 1.97    | Ang.      |
|                   |                                                  | x,y,-1+z =              | 1_554   | Check     |
| PLAT432_ALERT_2_G | Short Inter X...Y Contact                        | C53 ..C61               | 3.20    | Ang.      |
|                   |                                                  | x,y,z =                 | 1_555   | Check     |
| PLAT605_ALERT_4_G | Largest Solvent Accessible VOID in the Structure |                         | 135     | A**3      |
| PLAT721_ALERT_1_G | Bond Calc                                        | 0.99000, Rep            | 0.97990 | Dev...    |
|                   | C54 -H54A                                        | 1_555 1_555 .....       | #       | 266 Check |
| PLAT722_ALERT_1_G | Angle Calc                                       | 111.00, Rep             | 109.50  | Dev...    |
|                   | C53 -C55 -H55A                                   | 1_555 1_555 1_555       | #       | 572 Check |
| PLAT722_ALERT_1_G | Angle Calc                                       | 108.00, Rep             | 109.40  | Dev...    |
|                   | H64A -C64 -H64C                                  | 1_555 1_555 1_555       | #       | 582 Check |
| PLAT722_ALERT_1_G | Angle Calc                                       | 108.00, Rep             | 109.20  | Dev...    |
|                   | C35 -C33 -H33C                                   | 1_555 1_555 1_555       | #       | 610 Check |
| PLAT722_ALERT_1_G | Angle Calc                                       | 111.00, Rep             | 109.50  | Dev...    |
|                   | H33A -C33 -H33B                                  | 1_555 1_555 1_555       | #       | 611 Check |
| PLAT779_ALERT_4_G | Suspect or Irrelevant (Bond) Angle(s) in CIF ... |                         |         | 0.00 Deg. |
|                   | O8 -O8 -PB1                                      | 3_655 1_555 1_555 ..... | #       | 219 Check |
| PLAT779_ALERT_4_G | Suspect or Irrelevant (Bond) Angle(s) in CIF ... |                         |         | 0.00 Deg. |
|                   | O8 -O8 -PB1                                      | 4_565 1_555 1_555 ..... | #       | 220 Check |
| PLAT779_ALERT_4_G | Suspect or Irrelevant (Bond) Angle(s) in CIF ... |                         |         | 0.00 Deg. |
|                   | O8 -O8 -PB1                                      | 2_665 1_555 1_555 ..... | #       | 221 Check |
| PLAT779_ALERT_4_G | Suspect or Irrelevant (Bond) Angle(s) in CIF ... |                         |         | 0.00 Deg. |
|                   | O8 -O8 -AL1                                      | 3_655 1_555 3_655 ..... | #       | 222 Check |
| PLAT779_ALERT_4_G | Suspect or Irrelevant (Bond) Angle(s) in CIF ... |                         |         | 0.00 Deg. |
|                   | O8 -O8 -AL1                                      | 4_565 1_555 3_655 ..... | #       | 223 Check |
| PLAT779_ALERT_4_G | Suspect or Irrelevant (Bond) Angle(s) in CIF ... |                         |         | 0.00 Deg. |
|                   | O8 -O8 -AL1                                      | 3_655 1_555 4_565 ..... | #       | 224 Check |
| PLAT779_ALERT_4_G | Suspect or Irrelevant (Bond) Angle(s) in CIF ... |                         |         | 0.00 Deg. |
|                   | O8 -O8 -AL1                                      | 4_565 1_555 4_565 ..... | #       | 225 Check |
| PLAT779_ALERT_4_G | Suspect or Irrelevant (Bond) Angle(s) in CIF ... |                         |         | 0.00 Deg. |
|                   | O8 -O8 -AL1                                      | 2_665 1_555 3_655 ..... | #       | 226 Check |
| PLAT779_ALERT_4_G | Suspect or Irrelevant (Bond) Angle(s) in CIF ... |                         |         | 0.00 Deg. |
|                   | O8 -O8 -AL1                                      | 2_665 1_555 4_565 ..... | #       | 227 Check |
| PLAT779_ALERT_4_G | Suspect or Irrelevant (Bond) Angle(s) in CIF ... |                         |         | 0.00 Deg. |
|                   | O8 -O8 -AL1                                      | 2_665 1_555 2_665 ..... | #       | 228 Check |
| PLAT779_ALERT_4_G | Suspect or Irrelevant (Bond) Angle(s) in CIF ... |                         |         | 0.00 Deg. |
|                   | O8 -O8 -AL1                                      | 4_565 1_555 2_665 ..... | #       | 229 Check |
| PLAT779_ALERT_4_G | Suspect or Irrelevant (Bond) Angle(s) in CIF ... |                         |         | 0.00 Deg. |
|                   | O8 -O8 -AL1                                      | 4_565 1_555 1_555 ..... | #       | 230 Check |
| PLAT779_ALERT_4_G | Suspect or Irrelevant (Bond) Angle(s) in CIF ... |                         |         | 0.00 Deg. |
|                   | O8 -O8 -AL1                                      | 3_655 1_555 2_665 ..... | #       | 231 Check |
| PLAT779_ALERT_4_G | Suspect or Irrelevant (Bond) Angle(s) in CIF ... |                         |         | 0.00 Deg. |

|                                                                                 |     |      |       |       |       |       |   |     |       |
|---------------------------------------------------------------------------------|-----|------|-------|-------|-------|-------|---|-----|-------|
| 08                                                                              | -08 | -AL1 | 2_665 | 1_555 | 1_555 | ..... | # | 232 | Check |
| PLAT779_ALERT_4_G Suspect or Irrelevant (Bond) Angle(s) in CIF ... 0.00 Deg.    |     |      |       |       |       |       |   |     |       |
| 08                                                                              | -08 | -AL1 | 3_655 | 1_555 | 1_555 | ..... | # | 233 | Check |
| PLAT779_ALERT_4_G Suspect or Irrelevant (Bond) Angle(s) in CIF ... 0.00 Deg.    |     |      |       |       |       |       |   |     |       |
| 08                                                                              | -08 | -08  | 4_565 | 1_555 | 2_665 | ..... | # | 234 | Check |
| PLAT779_ALERT_4_G Suspect or Irrelevant (Bond) Angle(s) in CIF ... 0.00 Deg.    |     |      |       |       |       |       |   |     |       |
| 08                                                                              | -08 | -08  | 4_565 | 1_555 | 3_655 | ..... | # | 235 | Check |
| PLAT779_ALERT_4_G Suspect or Irrelevant (Bond) Angle(s) in CIF ... 0.00 Deg.    |     |      |       |       |       |       |   |     |       |
| 08                                                                              | -08 | -08  | 3_655 | 1_555 | 2_665 | ..... | # | 236 | Check |
| PLAT794_ALERT_5_G Tentative Bond Valency for Pb1 (II) . 2.05 Info               |     |      |       |       |       |       |   |     |       |
| PLAT794_ALERT_5_G Tentative Bond Valency for Pb3 (II) . 2.15 Info               |     |      |       |       |       |       |   |     |       |
| PLAT794_ALERT_5_G Tentative Bond Valency for Al1 (III) . 2.75 Info              |     |      |       |       |       |       |   |     |       |
| PLAT794_ALERT_5_G Tentative Bond Valency for Al2 (III) . 2.81 Info              |     |      |       |       |       |       |   |     |       |
| PLAT794_ALERT_5_G Tentative Bond Valency for Al4 (III) . 2.71 Info              |     |      |       |       |       |       |   |     |       |
| PLAT794_ALERT_5_G Tentative Bond Valency for Al6 (III) . 2.94 Info              |     |      |       |       |       |       |   |     |       |
| PLAT794_ALERT_5_G Tentative Bond Valency for Al7 (III) . 2.78 Info              |     |      |       |       |       |       |   |     |       |
| PLAT794_ALERT_5_G Tentative Bond Valency for Al8 (III) . 2.88 Info              |     |      |       |       |       |       |   |     |       |
| PLAT802_ALERT_4_G CIF Input Record(s) with more than 80 Characters 6 Info       |     |      |       |       |       |       |   |     |       |
| PLAT860_ALERT_3_G Number of Least-Squares Restraints ..... 224 Note             |     |      |       |       |       |       |   |     |       |
| PLAT868_ALERT_4_G ALERTS Due to the Use of _smtbx_masks Suppressed ! Info       |     |      |       |       |       |       |   |     |       |
| PLAT909_ALERT_3_G Percentage of I>2sig(I) Data at Theta(Max) Still 37% Note     |     |      |       |       |       |       |   |     |       |
| PLAT933_ALERT_2_G Number of HKL-OMIT Records in Embedded .res File 11 Note      |     |      |       |       |       |       |   |     |       |
| 0 1 2, -1 2 2, 1 27 6, -5 10 12, -4 12 14, -2 3 1,                              |     |      |       |       |       |       |   |     |       |
| 1 4 1, -1 5 2, -2 4 0, 2 7 2, 0 2 5,                                            |     |      |       |       |       |       |   |     |       |
| PLAT941_ALERT_3_G Average HKL Measurement Multiplicity ..... 3.2 Low            |     |      |       |       |       |       |   |     |       |
| PLAT969_ALERT_5_G The 'Henn et al.' R-Factor-gap value ..... 5.284 Note         |     |      |       |       |       |       |   |     |       |
| Predicted wR2: Based on SigI**2 6.46 or SHELX Weight 31.70                      |     |      |       |       |       |       |   |     |       |
| PLAT978_ALERT_2_G Number C-C Bonds with Positive Residual Density. 0 Info       |     |      |       |       |       |       |   |     |       |
| PLAT984_ALERT_1_G The C-f' = 0.0147 Deviates from the B&C-Value 0.0137 Check    |     |      |       |       |       |       |   |     |       |
| PLAT984_ALERT_1_G The N-f' = 0.0253 Deviates from the B&C-Value 0.0241 Check    |     |      |       |       |       |       |   |     |       |
| PLAT984_ALERT_1_G The O-f' = 0.0412 Deviates from the B&C-Value 0.0389 Check    |     |      |       |       |       |       |   |     |       |
| PLAT984_ALERT_1_G The Pb-f' = -4.2646 Deviates from the B&C-Value -4.4950 Check |     |      |       |       |       |       |   |     |       |
| PLAT985_ALERT_1_G The Al-f" = 0.1843 Deviates from the B&C-Value 0.1873 Check   |     |      |       |       |       |       |   |     |       |
| PLAT985_ALERT_1_G The Pb-f" = 7.1982 Deviates from the B&C-Value 6.8412 Check   |     |      |       |       |       |       |   |     |       |
| PLAT985_ALERT_1_G The S-f" = 0.4242 Deviates from the B&C-Value 0.4295 Check    |     |      |       |       |       |       |   |     |       |

---

6 **ALERT level A** = Most likely a serious problem - resolve or explain  
 14 **ALERT level B** = A potentially serious problem, consider carefully  
 32 **ALERT level C** = Check. Ensure it is not caused by an omission or oversight  
 108 **ALERT level G** = General information/check it is not something unexpected

16 ALERT type 1 CIF construction/syntax error, inconsistent or missing data  
 53 ALERT type 2 Indicator that the structure model may be wrong or deficient  
 23 ALERT type 3 Indicator that the structure quality may be low  
 58 ALERT type 4 Improvement, methodology, query or suggestion  
 10 ALERT type 5 Informative message, check

---

## checkCIF publication errors

---

### Alert level A

PUBL004\_ALERT\_1\_A The contact author's name and address are missing,  
 \_publ\_contact\_author\_name and \_publ\_contact\_author\_address.

PUBL005\_ALERT\_1\_A \_publ\_contact\_author\_email, \_publ\_contact\_author\_fax and  
\_publ\_contact\_author\_phone are all missing.

At least one of these should be present.

PUBL006\_ALERT\_1\_A \_publ\_requested\_journal is missing

e.g. 'Acta Crystallographica Section C'

PUBL008\_ALERT\_1\_A \_publ\_section\_title is missing. Title of paper.

PUBL009\_ALERT\_1\_A \_publ\_author\_name is missing. List of author(s) name(s).

PUBL010\_ALERT\_1\_A \_publ\_author\_address is missing. Author(s) address(es).

PUBL012\_ALERT\_1\_A \_publ\_section\_abstract is missing.

Abstract of paper in English.

---

7 **ALERT level A** = Data missing that is essential or data in wrong format

0 **ALERT level G** = General alerts. Data that may be required is missing

---

## Publication of your CIF

You should attempt to resolve as many as possible of the alerts in all categories. Often the minor alerts point to easily fixed oversights, errors and omissions in your CIF or refinement strategy, so attention to these fine details can be worthwhile. In order to resolve some of the more serious problems it may be necessary to carry out additional measurements or structure refinements. However, the nature of your study may justify the reported deviations from journal submission requirements and the more serious of these should be commented upon in the discussion or experimental section of a paper or in the "special\_details" fields of the CIF. *checkCIF* was carefully designed to identify outliers and unusual parameters, but every test has its limitations and alerts that are not important in a particular case may appear. Conversely, the absence of alerts does not guarantee there are no aspects of the results needing attention. It is up to the individual to critically assess their own results and, if necessary, seek expert advice.

If level A alerts remain, which you believe to be justified deviations, and you intend to submit this CIF for publication in a journal, you should additionally insert an explanation in your CIF using the Validation Reply Form (VRF) below. This will allow your explanation to be considered as part of the review process.

## Validation response form

Please find below a validation response form (VRF) that can be filled in and pasted into your CIF.

```
# start Validation Reply Form
_vrf_PUBL004_GLOBAL
;
PROBLEM: The contact author's name and address are missing,
RESPONSE: ...
;
_vrf_PUBL005_GLOBAL
;
PROBLEM: _publ_contact_author_email, _publ_contact_author_fax and
RESPONSE: ...
;
_vrf_PUBL006_GLOBAL
;
```

```

PROBLEM: _publ_requested_journal is missing
RESPONSE: ...
;
_vrf_PUBL008_GLOBAL
;
PROBLEM: _publ_section_title is missing. Title of paper.
RESPONSE: ...
;
_vrf_PUBL009_GLOBAL
;
PROBLEM: _publ_author_name is missing. List of author(s) name(s).
RESPONSE: ...
;
_vrf_PUBL010_GLOBAL
;
PROBLEM: _publ_author_address is missing. Author(s) address(es).
RESPONSE: ...
;
_vrf_PUBL012_GLOBAL
;
PROBLEM: _publ_section_abstract is missing.
RESPONSE: ...
;
# end Validation Reply Form

```

If you wish to submit your CIF for publication in Acta Crystallographica Section C or E, you should upload your CIF via the web. If you wish to submit your CIF for publication in IUCrData you should upload your CIF via the web. If your CIF is to form part of a submission to another IUCr journal, you will be asked, either during electronic submission or by the Co-editor handling your paper, to upload your CIF via our web site.

---

**PLATON version of 15/07/2024; check.def file version of 15/07/2024**

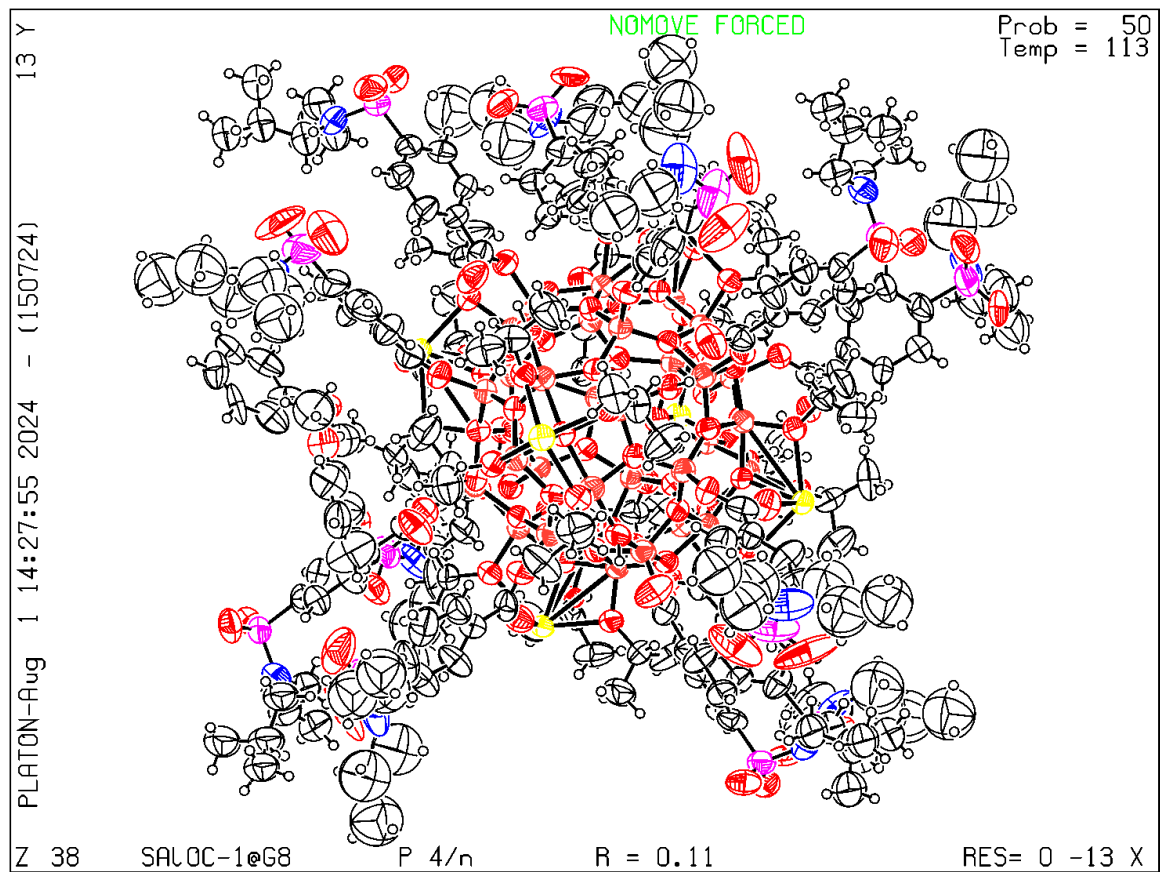

Supplement: Supplementary file 7 [file 338c3c16b868c7df71e3e230.pdf]
