# Supplementary material for: Precise Nanochemistry of Spherical Aluminum Oxo Clusters for Accurate Surface Guest Recognition and Release
Source: Research Square preprint supplement (doi:10.21203/rs.3.rs-4948547/v1), 2024-11-06

## checkCIF/PLATON report

Structure factors have been supplied for datablock(s) SAIOC-1@G2

THIS REPORT IS FOR GUIDANCE ONLY. IF USED AS PART OF A REVIEW PROCEDURE FOR PUBLICATION, IT SHOULD NOT REPLACE THE EXPERTISE OF AN EXPERIENCED CRYSTALLOGRAPHIC REFEREE.

No syntax errors found.      CIF dictionary      Interpreting this report

### Datablock: SAIOC-1@G2

---

|                        |                                                                 |                                                  |                          |
|------------------------|-----------------------------------------------------------------|--------------------------------------------------|--------------------------|
| Bond precision:        | C-C = 0.0265 Å                                                  | Wavelength=1.34050                               |                          |
| Cell:                  | a=29.8617(5)<br>alpha=90                                        | b=29.8617(5)<br>beta=90                          | c=19.1914(5)<br>gamma=90 |
| Temperature:           | 100 K                                                           |                                                  |                          |
|                        | Calculated                                                      | Reported                                         |                          |
| Volume                 | 17113.4(7)                                                      | 17113.4(7)                                       |                          |
| Space group            | P 4/n                                                           | P 4/n                                            |                          |
| Hall group             | -P 4a                                                           | -P 4a                                            |                          |
| Moiety formula         | C216 H364 Al32 N12 O110 Pb6<br>S12, 3(C2 H6 O S) [+<br>solvent] | C216 H364 Al32 N12 O110 Pb6<br>S12, 3(C2 H6 O S) |                          |
| Sum formula            | C222 H382 Al32 N12 O113 Pb6<br>S15 [+ solvent]                  | C222 H382 Al32 N12 O113 Pb6<br>S15               |                          |
| Mr                     | 7614.88                                                         | 7614.77                                          |                          |
| Dx, g cm <sup>-3</sup> | 1.478                                                           | 1.478                                            |                          |
| Z                      | 2                                                               | 2                                                |                          |
| Mu (mm <sup>-1</sup> ) | 5.298                                                           | 5.442                                            |                          |
| F000                   | 7700.0                                                          | 7700.0                                           |                          |
| F000'                  | 7680.81                                                         |                                                  |                          |
| h, k, lmax             | 35, 35, 22                                                      | 35, 34, 22                                       |                          |
| Nref                   | 14621                                                           | 14557                                            |                          |
| Tmin, Tmax             |                                                                 | 1.000, 1.000                                     |                          |
| Tmin'                  |                                                                 |                                                  |                          |

Correction method= # Reported T Limits: Tmin=1.000 Tmax=1.000  
AbsCorr = SPHERE

Data completeness= 0.996      Theta(max)= 52.043

R(reflections)= 0.0860( 8987)

wR2(reflections)=  
0.2836( 14557)

S = 1.042

Npar= 899

---

The following ALERTS were generated. Each ALERT has the format  
**test-name\_ALERT\_alert-type\_alert-level.**  
Click on the hyperlinks for more details of the test.

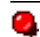

#### Alert level A

PLAT973\_ALERT\_2\_A Check Calcd Positive Resid. Density on Pb3 2.44 eA-3

**Author Response:** These alerts are generated because of residual density peaks near the heaviest atoms in the structure, due to fourier termination ripples. After inspection, the residual electron density peak does not make chemical sense and will not affect the correct identification of the structure.

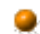

#### Alert level B

PLAT241\_ALERT\_2\_B High 'MainMol' Ueq as Compared to Neighbors of S2 Check

**Author Response:** These alerts are generated because of a slight unresolved disorder caused by free rotation of the flexible chain at the end of the ligand. Some refi commands such as DELU, SIMU and ISOR were used to address such abnormal Ueq value, but failed. After inspection, this does not affect the correct assign of atom types.

PLAT241\_ALERT\_2\_B High 'MainMol' Ueq as Compared to Neighbors of C24 Check

**Author Response:** These alerts are generated because of a slight unresolved disorder caused by free rotation of the flexible chain at the end of the ligand. Some refi commands such as DELU, SIMU and ISOR were used to address such abnormal Ueq value, but failed. After inspection, this does not affect the correct assign of atom types.

PLAT241\_ALERT\_2\_B High 'MainMol' Ueq as Compared to Neighbors of C25 Check

**Author Response:** These alerts are generated because of a slight unresolved disorder caused by free rotation of the flexible chain at the end of the ligand. Some refi commands such as DELU, SIMU and ISOR were used to address such abnormal Ueq value, but failed. After inspection, this does not affect the correct assign of atom types.

PLAT241\_ALERT\_2\_B High 'MainMol' Ueq as Compared to Neighbors of C47 Check

**Author Response:** These alerts are generated because of a slight unresolved disorder caused by free rotation of the flexible chain at the end of the ligand. Some refi commands such as DELU, SIMU and ISOR were used to address such abnormal Ueq value, but failed. After inspection, this does not affect the correct assign of atom types.

PLAT242\_ALERT\_2\_B Low 'MainMol' Ueq as Compared to Neighbors of N1 Check

**Author Response:** These alerts are generated because of a slight unresolved disorder caused by free rotation of the flexible chain at the end of the ligand. Some refi commands such as DELU, SIMU and ISOR were used to address such abnormal Ueq value, but failed. After inspection, this does not affect the correct assign of atom types.

PLAT242\_ALERT\_2\_B Low 'MainMol' Ueq as Compared to Neighbors of N2 Check

**Author Response:** These alerts are generated because of a slight unresolved disorder caused by free rotation of the flexible chain at the end of the ligand. Some refi commands such as DELU, SIMU and ISOR were used to address such abnormal Ueq value, but failed. After inspection, this does not affect the correct assign of atom types.

PLAT242\_ALERT\_2\_B Low 'MainMol' Ueq as Compared to Neighbors of N3 Check

**Author Response:** These alerts are generated because of a slight unresolved disorder caused by free rotation of the flexible chain at the end of the ligand. Some refi commands such as DELU, SIMU and ISOR were used to address such abnormal Ueq value, but failed. After inspection, this does not affect the correct assign of atom types.

PLAT242\_ALERT\_2\_B Low 'MainMol' Ueq as Compared to Neighbors of C19 Check

**Author Response:** These alerts are generated because of a slight unresolved disorder caused by free rotation of the flexible chain at the end of the ligand. Some refi commands such as DELU, SIMU and ISOR were used to address such abnormal Ueq value, but failed. After inspection, this does not affect the correct assign of atom types.

PLAT242\_ALERT\_2\_B Low 'MainMol' Ueq as Compared to Neighbors of C34 Check

**Author Response:** These alerts are generated because of a slight unresolved disorder caused by free rotation of the flexible chain at the end of the ligand. Some refi commands such as DELU, SIMU and ISOR were used to address such abnormal Ueq value, but failed. After inspection, this does not affect the correct assign of atom types.

PLAT342\_ALERT\_3\_B Low Bond Precision on C-C Bonds ..... 0.02645 Ang.

**Author Response:** These alerts are generated because of a slight unresolved disorder caused by free rotation of the flexible chain at the end of the ligand. Some refi commands such as DELU, SIMU and ISOR were used to address such abnormal Ueq value, but failed. After inspection, this does not affect the correct assign of atom types.

PLAT971\_ALERT\_2\_B Check Calcd Resid. Dens. 1.02Ang From Pb3 3.16 eA-3

**Author Response:** These alerts are generated because of residual density peaks near the heaviest atoms in the structure, due to fourier termination ripples. After inspection, the residual electron density peak does not make chemical sense and will not affect the correct identification of the structure.

PLAT973\_ALERT\_2\_B Check Calcd Positive Resid. Density on Pb2 1.90 eA-3

**Author Response:** These alerts are generated because of residual density peaks near the heaviest atoms in the structure, due to fourier termination ripples. After inspection, the residual electron density peak does not make chemical sense and will not affect the correct identification of the structure.

PLAT973\_ALERT\_2\_B Check Calcd Positive Resid. Density on Pb1 1.85 eA-3

**Author Response:** These alerts are generated because of residual density peaks near the heaviest atoms in the structure, due to fourier termination ripples. After inspection, the residual electron density peak does not make chemical sense and will not affect the correct identification of the structure.

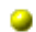

#### **Alert level C**

RADNW01\_ALERT\_1\_C The radiation wavelength lies outside the expected range  
for the supplied radiation type. Expected range 1.34130-1.34150  
Wavelength given = 1.34050

THETM01\_ALERT\_3\_C The value of sine(theta\_max)/wavelength is less than 0.590  
Calculated sin(theta\_max)/wavelength = 0.5882

PLAT084\_ALERT\_3\_C High wR2 Value (i.e. > 0.25) ..... 0.28 Report

PLAT094\_ALERT\_2\_C Ratio of Maximum / Minimum Residual Density .... 2.41 Report

|                   |            |           |     |                             |       |     |       |
|-------------------|------------|-----------|-----|-----------------------------|-------|-----|-------|
| PLAT220_ALERT_2_C | NonSolvent | Resd 1    | C   | Ueq(max)/Ueq(min)           | Range | 3.8 | Ratio |
| PLAT220_ALERT_2_C | NonSolvent | Resd 1    | O   | Ueq(max)/Ueq(min)           | Range | 5.3 | Ratio |
| PLAT222_ALERT_3_C | NonSolvent | Resd 1    | H   | Uiso(max)/Uiso(min)         | Range | 5.5 | Ratio |
| PLAT241_ALERT_2_C | High       | 'MainMol' | Ueq | as Compared to Neighbors of |       | 07  | Check |

**Author Response:** These alerts are generated because of a slight unresolved disorder caused by free rotation of the flexible chain at the end of the ligand. Some refi commands such as DELU, SIMU and ISOR were used to address such abnormal Ueq value, but failed. After inspection, this does not affect the correct assign of atom types.

|                   |      |           |     |                             |  |    |       |
|-------------------|------|-----------|-----|-----------------------------|--|----|-------|
| PLAT241_ALERT_2_C | High | 'MainMol' | Ueq | as Compared to Neighbors of |  | C3 | Check |
|-------------------|------|-----------|-----|-----------------------------|--|----|-------|

**Author Response:** These alerts are generated because of a slight unresolved disorder caused by free rotation of the flexible chain at the end of the ligand. Some refi commands such as DELU, SIMU and ISOR were used to address such abnormal Ueq value, but failed. After inspection, this does not affect the correct assign of atom types.

|                   |      |           |     |                             |  |    |       |
|-------------------|------|-----------|-----|-----------------------------|--|----|-------|
| PLAT241_ALERT_2_C | High | 'MainMol' | Ueq | as Compared to Neighbors of |  | C4 | Check |
|-------------------|------|-----------|-----|-----------------------------|--|----|-------|

**Author Response:** These alerts are generated because of a slight unresolved disorder caused by free rotation of the flexible chain at the end of the ligand. Some refi commands such as DELU, SIMU and ISOR were used to address such abnormal Ueq value, but failed. After inspection, this does not affect the correct assign of atom types.

|                   |      |           |     |                             |  |     |       |
|-------------------|------|-----------|-----|-----------------------------|--|-----|-------|
| PLAT241_ALERT_2_C | High | 'MainMol' | Ueq | as Compared to Neighbors of |  | C12 | Check |
|-------------------|------|-----------|-----|-----------------------------|--|-----|-------|

**Author Response:** These alerts are generated because of a slight unresolved disorder caused by free rotation of the flexible chain at the end of the ligand. Some refi commands such as DELU, SIMU and ISOR were used to address such abnormal Ueq value, but failed. After inspection, this does not affect the correct assign of atom types.

|                   |      |           |     |                             |  |     |       |
|-------------------|------|-----------|-----|-----------------------------|--|-----|-------|
| PLAT241_ALERT_2_C | High | 'MainMol' | Ueq | as Compared to Neighbors of |  | C13 | Check |
|-------------------|------|-----------|-----|-----------------------------|--|-----|-------|

**Author Response:** These alerts are generated because of a slight unresolved disorder caused by free rotation of the flexible chain at the end of the ligand. Some refi commands such as DELU, SIMU and ISOR were used to address such abnormal Ueq value, but failed. After inspection, this does not affect the correct assign of atom types.

PLAT241\_ALERT\_2\_C High 'MainMol' Ueq as Compared to Neighbors of C18 Check

**Author Response:** These alerts are generated because of a slight unresolved disorder caused by free rotation of the flexible chain at the end of the ligand. Some refi commands such as DELU, SIMU and ISOR were used to address such abnormal Ueq value, but failed. After inspection, this does not affect the correct assign of atom types.

PLAT241\_ALERT\_2\_C High 'MainMol' Ueq as Compared to Neighbors of C20 Check

**Author Response:** These alerts are generated because of a slight unresolved disorder caused by free rotation of the flexible chain at the end of the ligand. Some refi commands such as DELU, SIMU and ISOR were used to address such abnormal Ueq value, but failed. After inspection, this does not affect the correct assign of atom types.

PLAT241\_ALERT\_2\_C High 'MainMol' Ueq as Compared to Neighbors of C33 Check

**Author Response:** These alerts are generated because of a slight unresolved disorder caused by free rotation of the flexible chain at the end of the ligand. Some refi commands such as DELU, SIMU and ISOR were used to address such abnormal Ueq value, but failed. After inspection, this does not affect the correct assign of atom types.

PLAT241\_ALERT\_2\_C High 'MainMol' Ueq as Compared to Neighbors of C46 Check

**Author Response:** These alerts are generated because of a slight unresolved disorder caused by free rotation of the flexible chain at the end of the ligand. Some refi commands such as DELU, SIMU and ISOR were used to address such abnormal Ueq value, but failed. After inspection, this does not affect the correct assign of atom types.

PLAT242\_ALERT\_2\_C Low 'MainMol' Ueq as Compared to Neighbors of O4 Check

**Author Response:** These alerts are generated because of a slight unresolved disorder caused by free rotation of the flexible chain at the end of the ligand. Some refi commands such as DELU, SIMU and ISOR were used to address such abnormal Ueq value, but failed. After inspection, this does not affect the correct assign of atom types.

PLAT242\_ALERT\_2\_C Low 'MainMol' Ueq as Compared to Neighbors of O14 Check

**Author Response:** These alerts are generated because of a slight unresolved disorder caused by free rotation of the flexible chain at the end of the ligand. Some refi commands such as DELU, SIMU and ISOR were used to address such abnormal Ueq value, but failed. After inspection, this does not affect the correct assign of atom types.

PLAT242\_ALERT\_2\_C Low 'MainMol' Ueq as Compared to Neighbors of C8 Check

**Author Response:** These alerts are generated because of a slight unresolved disorder caused by free rotation of the flexible chain at the end of the ligand. Some refi commands such as DELU, SIMU and ISOR were used to address such abnormal Ueq value, but failed. After inspection, this does not affect the correct assign of atom types.

PLAT242\_ALERT\_2\_C Low 'MainMol' Ueq as Compared to Neighbors of C11 Check

**Author Response:** These alerts are generated because of a slight unresolved disorder caused by free rotation of the flexible chain at the end of the ligand. Some refi commands such as DELU, SIMU and ISOR were used to address such abnormal Ueq value, but failed. After inspection, this does not affect the correct assign of atom types.

PLAT242\_ALERT\_2\_C Low 'MainMol' Ueq as Compared to Neighbors of C15 Check

**Author Response:** These alerts are generated because of a slight unresolved disorder caused by free rotation of the flexible chain at the end of the ligand. Some refi commands such as DELU, SIMU and ISOR were used to address such abnormal Ueq value, but failed. After inspection, this does not affect the correct assign of atom types.

PLAT242\_ALERT\_2\_C Low 'MainMol' Ueq as Compared to Neighbors of C16 Check

**Author Response:** These alerts are generated because of a slight unresolved disorder caused by free rotation of the flexible chain at the end of the ligand. Some refi commands such as DELU, SIMU and ISOR were used to address such abnormal Ueq value, but failed. After inspection, this does not affect the correct assign of atom types.

PLAT242\_ALERT\_2\_C Low 'MainMol' Ueq as Compared to Neighbors of C29 Check

**Author Response:** These alerts are generated because of a slight unresolved disorder caused by free rotation of the flexible chain at the end of the ligand. Some refi commands such as DELU, SIMU and ISOR were used to address such abnormal Ueq value, but failed. After inspection, this does not affect the correct assign of atom types.

PLAT242\_ALERT\_2\_C Low 'MainMol' Ueq as Compared to Neighbors of C51 Check

**Author Response:** These alerts are generated because of a slight unresolved disorder caused by free rotation of the flexible chain at the end of the ligand. Some refi commands such as DELU, SIMU and ISOR were used to address such abnormal Ueq value, but failed. After inspection, this does not affect the correct assign of atom types.

|                   |                                                  |                  |        |        |
|-------------------|--------------------------------------------------|------------------|--------|--------|
| PLAT260_ALERT_2_C | Large Average Ueq of Residue Including           | Pb1              | 0.175  | Check  |
| PLAT260_ALERT_2_C | Large Average Ueq of Residue Including           | S4               | 0.253  | Check  |
| PLAT369_ALERT_2_C | Long C(sp2)-C(sp2) Bond C11 - C14                | .                | 1.54   | Ang.   |
| PLAT410_ALERT_2_C | Short Intra H...H Contact H45A ..H47B            | .                | 1.94   | Ang.   |
|                   |                                                  | x,y,z =          | 1_555  | Check  |
| PLAT412_ALERT_2_C | Short Intra XH3 .. XHn H22A ..H24A               | .                | 1.87   | Ang.   |
|                   |                                                  | x,y,z =          | 1_555  | Check  |
| PLAT905_ALERT_3_C | Negative K value in the Analysis of Variance ... |                  | -2.786 | Report |
| PLAT911_ALERT_3_C | Missing FCF Refl Between Thmin & STh/L=          | 0.588            | 63     | Report |
|                   | 1 3 0, -2 6 0, 0 6 0, 2 6 0, 1 7 0,              | 8 10 0,          |        |        |
|                   | 1 2 1, 4 5 1, 3 6 1, -7 8 1, 5 10 1,             | 7 10 1,          |        |        |
|                   | -4 12 1, -8 13 1, 0 1 2, -3 4 2, 2 5 2,          | -4 7 2,          |        |        |
|                   | -6 8 2, -6 9 2, -9 10 2, -3 10 2, 2 10 2,        | -1 2 3,          |        |        |
|                   | 0 8 3, 8 8 3, 5 9 3, 3 14 3, 0 4 4,              | 2 5 4,           |        |        |
|                   | 1 6 4, 3 8 4, -5 10 4, 2 11 4, -7 12 4,          | 0 3 5,           |        |        |
|                   | 0 6 5, 5 7 5, -6 9 5, -3 9 5, -1 9 5,            | 7 12 5,          |        |        |
|                   | -9 14 5, 1 3 6, -6 10 6, 6 13 6, 2 6 7,          | 3 7 7,           |        |        |
|                   | 4 10 7, -1 4 8, 2 5 8, 4 5 8, 4 7 8,             | -3 12 8,         |        |        |
|                   | 1 3 10, -5 6 10, 7 26 11, 8 26 11,               | 7 28 11,         |        |        |
|                   | 1 2 12, -2 12 21, -1 12 21,                      |                  |        |        |
| PLAT971_ALERT_2_C | Check Calcd Resid. Dens.                         | 1.07Ang From Pb1 | 2.11   | eA-3   |

**Author Response:** These alerts are generated because of residual density peaks near the heaviest atoms in the structure, due to fourier termination ripples. After inspection, the residual electron density peak does not make chemical sense and will not affect the correct identification of the structure.

PLAT971\_ALERT\_2\_C Check Calcd Resid. Dens. 1.18Ang From Pb2 2.01 eA-3

**Author Response:** These alerts are generated because of residual density peaks near the heaviest atoms in the structure, due to fourier termination ripples. After inspection, the residual electron density peak does not make chemical sense and will not affect the correct identification of the structure.



PLAT971\_ALERT\_2\_C Check Calcd Resid. Dens. 0.92Ang From Pb2 1.98 eA-3

**Author Response:** These alerts are generated because of residual density peaks near the heaviest atoms in the structure, due to fourier termination ripples. After inspection, the residual electron density peak does not make chemical sense and will not affect the correct identification of the structure.

PLAT971\_ALERT\_2\_C Check Calcd Resid. Dens. 0.84Ang From Pb2 1.90 eA-3

**Author Response:** These alerts are generated because of residual density peaks near the heaviest atoms in the structure, due to fourier termination ripples. After inspection, the residual electron density peak does not make chemical sense and will not affect the correct identification of the structure.

PLAT971\_ALERT\_2\_C Check Calcd Resid. Dens. 1.15Ang From Pb3 1.78 eA-3

**Author Response:** These alerts are generated because of residual density peaks near the heaviest atoms in the structure, due to fourier termination ripples. After inspection, the residual electron density peak does not make chemical sense and will not affect the correct identification of the structure.

PLAT971\_ALERT\_2\_C Check Calcd Resid. Dens. 0.94Ang From Pb1 1.69 eA-3

**Author Response:** These alerts are generated because of residual density peaks near the heaviest atoms in the structure, due to fourier termination ripples. After inspection, the residual electron density peak does not make chemical sense and will not affect the correct identification of the structure.

PLAT971\_ALERT\_2\_C Check Calcd Resid. Dens. 0.98Ang From Pb2 1.65 eA-3

**Author Response:** These alerts are generated because of residual density peaks near the heaviest atoms in the structure, due to fourier termination ripples. After inspection, the residual electron density peak does not make chemical sense and will not affect the correct identification of the structure.

PLAT971\_ALERT\_2\_C Check Calcd Resid. Dens. 1.09Ang From Pb2 1.61 eA-3

**Author Response:** These alerts are generated because of residual density peaks near the heaviest atoms in the structure, due to fourier termination ripples. After inspection, the residual electron density peak does not make chemical sense and will not affect the correct identification of the structure.

---

**Alert level G**

ABSMU01\_ALERT\_1\_G Calculation of \_exptl\_absorpt\_correction\_mu  
not performed for this radiation type.

PLAT002\_ALERT\_2\_G Number of Distance or Angle Restraints on AtSite 32 Note

PLAT003\_ALERT\_2\_G Number of Uiso or U(i,j) Restrained non-H Atoms 34 Report

PLAT007\_ALERT\_5\_G Number of Unrefined Donor-H Atoms ..... 2 Report

H13 H22

PLAT051\_ALERT\_1\_G Mu(calc) and Mu(CIF) Ratio Differs from 1.0 by . 2.64 %

PLAT069\_ALERT\_1\_G Atom Label Without Numerical Part ..... A1 Do !

PLAT072\_ALERT\_2\_G SHELXL First Parameter in WGHT Unusually Large 0.17 Report

PLAT083\_ALERT\_2\_G SHELXL Second Parameter in WGHT Unusually Large 21.49 Why ?

PLAT172\_ALERT\_4\_G The CIF-Embedded .res File Contains DFIX Records 29 Report

PLAT173\_ALERT\_4\_G The CIF-Embedded .res File Contains DANG Records 13 Report

PLAT177\_ALERT\_4\_G The CIF-Embedded .res File Contains DELU Records 4 Report

PLAT178\_ALERT\_4\_G The CIF-Embedded .res File Contains SIMU Records 4 Report

PLAT186\_ALERT\_4\_G The CIF-Embedded .res File Contains ISOR Records 2 Report

PLAT187\_ALERT\_4\_G The CIF-Embedded .res File Contains RIGU Records 1 Report

PLAT188\_ALERT\_3\_G A Non-default SIMU Restraint Value has been used 0.0100 Report

PLAT188\_ALERT\_3\_G A Non-default SIMU Restraint Value has been used 0.0100 Report

PLAT188\_ALERT\_3\_G A Non-default SIMU Restraint Value has been used 0.0100 Report

PLAT188\_ALERT\_3\_G A Non-default SIMU Restraint Value has been used 0.0100 Report

PLAT190\_ALERT\_3\_G A Non-default RIGU Restraint Value for First Par 0.0100 Report

PLAT190\_ALERT\_3\_G A Non-default RIGU Restraint Value for SecondPar 0.0200 Report

PLAT192\_ALERT\_3\_G A Non-default DELU Restraint Value for SecondPar 0.0200 Report

PLAT192\_ALERT\_3\_G A Non-default DELU Restraint Value for SecondPar 0.0200 Report

PLAT192\_ALERT\_3\_G A Non-default DELU Restraint Value for SecondPar 0.0200 Report

PLAT192\_ALERT\_3\_G A Non-default DELU Restraint Value for SecondPar 0.0200 Report

PLAT300\_ALERT\_4\_G Atom Site Occupancy of C6 Constrained at 0.75 Check

PLAT300\_ALERT\_4\_G Atom Site Occupancy of C7 Constrained at 0.25 Check

PLAT300\_ALERT\_4\_G Atom Site Occupancy of H5AA Constrained at 0.75 Check

PLAT300\_ALERT\_4\_G Atom Site Occupancy of H5AB Constrained at 0.75 Check

PLAT300\_ALERT\_4\_G Atom Site Occupancy of H6A Constrained at 0.75 Check

PLAT300\_ALERT\_4\_G Atom Site Occupancy of H6B Constrained at 0.75 Check

PLAT300\_ALERT\_4\_G Atom Site Occupancy of H6C Constrained at 0.75 Check

PLAT300\_ALERT\_4\_G Atom Site Occupancy of H5BC Constrained at 0.25 Check

PLAT300\_ALERT\_4\_G Atom Site Occupancy of H5BD Constrained at 0.25 Check

PLAT300\_ALERT\_4\_G Atom Site Occupancy of H7A Constrained at 0.25 Check

PLAT300\_ALERT\_4\_G Atom Site Occupancy of H7B Constrained at 0.25 Check

PLAT300\_ALERT\_4\_G Atom Site Occupancy of H7C Constrained at 0.25 Check

PLAT300\_ALERT\_4\_G Atom Site Occupancy of S4 Constrained at 0.75 Check

PLAT300\_ALERT\_4\_G Atom Site Occupancy of O1 Constrained at 0.75 Check

PLAT300\_ALERT\_4\_G Atom Site Occupancy of C56 Constrained at 0.75 Check

PLAT300\_ALERT\_4\_G Atom Site Occupancy of C57 Constrained at 0.75 Check

PLAT300\_ALERT\_4\_G Atom Site Occupancy of H56A Constrained at 0.75 Check

PLAT300\_ALERT\_4\_G Atom Site Occupancy of H56B Constrained at 0.75 Check

PLAT300\_ALERT\_4\_G Atom Site Occupancy of H56C Constrained at 0.75 Check

PLAT300\_ALERT\_4\_G Atom Site Occupancy of H57A Constrained at 0.75 Check

PLAT300\_ALERT\_4\_G Atom Site Occupancy of H57B Constrained at 0.75 Check

PLAT300\_ALERT\_4\_G Atom Site Occupancy of H57C Constrained at 0.75 Check

PLAT301\_ALERT\_3\_G Main Residue Disorder ..... (Resd 1) 1% Note

PLAT302\_ALERT\_4\_G Anion/Solvent/Minor-Residue Disorder (Resd 2) 100% Note

PLAT304\_ALERT\_4\_G Non-Integer Number of Atoms in ..... (Resd 2) 7.50 Check

PLAT343\_ALERT\_2\_G Unusual sp3 Angle Range in Main Residue for C24 Check

PLAT413\_ALERT\_2\_G Short Inter XH3 .. XHn H1A ..H6B . 1.63 Ang.

1/2+y, 1-x, 1-z = 7\_666 Check

|                   |                                                  |                   |                |             |
|-------------------|--------------------------------------------------|-------------------|----------------|-------------|
| PLAT413_ALERT_2_G | Short Inter XH3 .. XHn                           | H1A ..H5BC        | .              | 1.96 Ang.   |
|                   |                                                  | $1/2+y, 1-x, 1-z$ | =              | 7_666 Check |
| PLAT413_ALERT_2_G | Short Inter XH3 .. XHn                           | H6C ..H27C        | .              | 1.92 Ang.   |
|                   |                                                  | $3/2-x, 1/2-y, z$ | =              | 2_655 Check |
| PLAT413_ALERT_2_G | Short Inter XH3 .. XHn                           | H44B ..H7C        | .              | 2.06 Ang.   |
|                   |                                                  | $3/2-y, x, 1+z$   | =              | 3_656 Check |
| PLAT432_ALERT_2_G | Short Inter X...Y Contact                        | C1 ..C6           | .              | 3.01 Ang.   |
|                   |                                                  | $1/2+y, 1-x, 1-z$ | =              | 7_666 Check |
| PLAT605_ALERT_4_G | Largest Solvent Accessible VOID in the Structure |                   |                | 145 A**3    |
| PLAT720_ALERT_4_G | Number of Unusual/Non-Standard Labels .....      |                   |                | 6 Note      |
|                   | A100 O00W H5AA H5AB H5BC H5BD                    |                   |                |             |
| PLAT721_ALERT_1_G | Bond Calc                                        | 0.99000, Rep      | 0.97960 Dev... | 0.01 Ang.   |
|                   | C7 -H7B                                          | 1_555 1_555 ..... | #              | 221 Check   |
| PLAT721_ALERT_1_G | Bond Calc                                        | 0.97000, Rep      | 0.98020 Dev... | 0.01 Ang.   |
|                   | C7 -H7C                                          | 1_555 1_555 ..... | #              | 222 Check   |
| PLAT779_ALERT_4_G | Suspect or Irrelevant (Bond) Angle(s) in CIF ... |                   |                | 0.00 Deg.   |
|                   | O15 -O15 -PB1 3_655                              | 1_555 1_555 ..... | #              | 206 Check   |
| PLAT779_ALERT_4_G | Suspect or Irrelevant (Bond) Angle(s) in CIF ... |                   |                | 0.00 Deg.   |
|                   | O15 -O15 -PB1 4_565                              | 1_555 1_555 ..... | #              | 207 Check   |
| PLAT779_ALERT_4_G | Suspect or Irrelevant (Bond) Angle(s) in CIF ... |                   |                | 0.00 Deg.   |
|                   | O15 -O15 -PB1 2_665                              | 1_555 1_555 ..... | #              | 208 Check   |
| PLAT779_ALERT_4_G | Suspect or Irrelevant (Bond) Angle(s) in CIF ... |                   |                | 0.00 Deg.   |
|                   | O15 -O15 -AL6 2_665                              | 1_555 2_665 ..... | #              | 209 Check   |
| PLAT779_ALERT_4_G | Suspect or Irrelevant (Bond) Angle(s) in CIF ... |                   |                | 0.00 Deg.   |
|                   | O15 -O15 -AL6 2_665                              | 1_555 1_555 ..... | #              | 210 Check   |
| PLAT779_ALERT_4_G | Suspect or Irrelevant (Bond) Angle(s) in CIF ... |                   |                | 0.00 Deg.   |
|                   | O15 -O15 -AL6 2_665                              | 1_555 4_565 ..... | #              | 211 Check   |
| PLAT779_ALERT_4_G | Suspect or Irrelevant (Bond) Angle(s) in CIF ... |                   |                | 0.00 Deg.   |
|                   | O15 -O15 -AL6 4_565                              | 1_555 2_665 ..... | #              | 212 Check   |
| PLAT779_ALERT_4_G | Suspect or Irrelevant (Bond) Angle(s) in CIF ... |                   |                | 0.00 Deg.   |
|                   | O15 -O15 -AL6 4_565                              | 1_555 4_565 ..... | #              | 213 Check   |
| PLAT779_ALERT_4_G | Suspect or Irrelevant (Bond) Angle(s) in CIF ... |                   |                | 0.00 Deg.   |
|                   | O15 -O15 -AL6 3_655                              | 1_555 2_665 ..... | #              | 214 Check   |
| PLAT779_ALERT_4_G | Suspect or Irrelevant (Bond) Angle(s) in CIF ... |                   |                | 0.00 Deg.   |
|                   | O15 -O15 -AL6 3_655                              | 1_555 3_655 ..... | #              | 215 Check   |
| PLAT779_ALERT_4_G | Suspect or Irrelevant (Bond) Angle(s) in CIF ... |                   |                | 0.00 Deg.   |
|                   | O15 -O15 -AL6 3_655                              | 1_555 4_565 ..... | #              | 216 Check   |
| PLAT779_ALERT_4_G | Suspect or Irrelevant (Bond) Angle(s) in CIF ... |                   |                | 0.00 Deg.   |
|                   | O15 -O15 -AL6 2_665                              | 1_555 3_655 ..... | #              | 217 Check   |
| PLAT779_ALERT_4_G | Suspect or Irrelevant (Bond) Angle(s) in CIF ... |                   |                | 0.00 Deg.   |
|                   | O15 -O15 -AL6 3_655                              | 1_555 1_555 ..... | #              | 218 Check   |
| PLAT779_ALERT_4_G | Suspect or Irrelevant (Bond) Angle(s) in CIF ... |                   |                | 0.00 Deg.   |
|                   | O15 -O15 -AL6 4_565                              | 1_555 1_555 ..... | #              | 219 Check   |
| PLAT779_ALERT_4_G | Suspect or Irrelevant (Bond) Angle(s) in CIF ... |                   |                | 0.00 Deg.   |
|                   | O15 -O15 -AL6 4_565                              | 1_555 3_655 ..... | #              | 220 Check   |
| PLAT779_ALERT_4_G | Suspect or Irrelevant (Bond) Angle(s) in CIF ... |                   |                | 0.00 Deg.   |
|                   | O15 -O15 -O15 3_655                              | 1_555 2_665 ..... | #              | 221 Check   |
| PLAT779_ALERT_4_G | Suspect or Irrelevant (Bond) Angle(s) in CIF ... |                   |                | 0.00 Deg.   |
|                   | O15 -O15 -O15 4_565                              | 1_555 2_665 ..... | #              | 222 Check   |
| PLAT779_ALERT_4_G | Suspect or Irrelevant (Bond) Angle(s) in CIF ... |                   |                | 0.00 Deg.   |
|                   | O15 -O15 -O15 4_565                              | 1_555 3_655 ..... | #              | 223 Check   |
| PLAT794_ALERT_5_G | Tentative Bond Valency for Pb1                   | (II)              | .              | 2.11 Info   |
| PLAT794_ALERT_5_G | Tentative Bond Valency for Pb3                   | (II)              | .              | 2.01 Info   |
| PLAT794_ALERT_5_G | Tentative Bond Valency for Al                    | (III)             | .              | 2.95 Info   |
| PLAT794_ALERT_5_G | Tentative Bond Valency for Al1                   | (III)             | .              | 2.77 Info   |
| PLAT794_ALERT_5_G | Tentative Bond Valency for Al00                  | (III)             | .              | 2.75 Info   |
| PLAT794_ALERT_5_G | Tentative Bond Valency for Al2                   | (III)             | .              | 2.78 Info   |

|                   |                                                            |         |                                     |         |       |
|-------------------|------------------------------------------------------------|---------|-------------------------------------|---------|-------|
| PLAT794_ALERT_5_G | Tentative Bond Valency for Al3                             | (III)   | .                                   | 2.80    | Info  |
| PLAT794_ALERT_5_G | Tentative Bond Valency for Al5                             | (III)   | .                                   | 2.76    | Info  |
| PLAT794_ALERT_5_G | Tentative Bond Valency for Al6                             | (III)   | .                                   | 2.88    | Info  |
| PLAT802_ALERT_4_G | CIF Input Record(s) with more than 80 Characters           |         |                                     | 6       | Info  |
| PLAT860_ALERT_3_G | Number of Least-Squares Restraints .....                   |         |                                     | 512     | Note  |
| PLAT868_ALERT_4_G | ALERTS Due to the Use of _smtbx_masks Suppressed           |         |                                     | !       | Info  |
| PLAT910_ALERT_3_G | Missing # of FCF Reflection(s) Below Theta(Min).           |         |                                     | 1       | Note  |
|                   | 1                                                          | 1       | 0,                                  |         |       |
| PLAT933_ALERT_2_G | Number of HKL-OMIT Records in Embedded .res File           |         |                                     | 54      | Note  |
|                   | 4                                                          | 7       | 8, 3 6 1, 4 5 8, 5 7 5, 3 8 4,      | 1       | 6 4,  |
|                   | -6                                                         | 10      | 6, 0 1 2, 4 5 1, 7 12 5, 1 3 6,     | -7      | 8 1,  |
|                   | -3                                                         | 4       | 2, -1 2 3, -8 13 1, 2 5 2, 0 8 3,   | 2       | 10 2, |
|                   | 8                                                          | 8       | 3, 7 10 1, 1 2 12, 3 14 3, -5 6 10, | -1      | 9 5,  |
|                   | -4                                                         | 7       | 2, 4 10 7, -3 12 8, 2 5 8, -5 10 4, | -6      | 9 2,  |
|                   | 2                                                          | 6       | 7, -9 10 2, 5 9 3, 5 10 1, -1 4 8,  | -7      | 12 4, |
|                   | -4                                                         | 12      | 1, 0 6 0, -3 10 2, -2 6 0, 0 4 4,   | -6      | 9 5,  |
|                   | -6                                                         | 8       | 2, 2 5 4, 3 7 7, 0 6 5, 2 11 4,     | 0       | 3 5,  |
|                   | 1                                                          | 3       | 10, 6 13 6,                         |         |       |
| PLAT941_ALERT_3_G | Average HKL Measurement Multiplicity .....                 |         |                                     | 3.8     | Low   |
| PLAT969_ALERT_5_G | The 'Henn et al.' R-Factor-gap value .....                 |         |                                     | 5.222   | Note  |
|                   | Predicted wr2: Based on SigI**2 5.43 or SHELX Weight 27.22 |         |                                     |         |       |
| PLAT978_ALERT_2_G | Number C-C Bonds with Positive Residual Density.           |         |                                     | 0       | Info  |
| PLAT984_ALERT_1_G | The C-f' =                                                 | 0.0147  | Deviates from the B&C-Value         | 0.0137  | Check |
| PLAT984_ALERT_1_G | The N-f' =                                                 | 0.0253  | Deviates from the B&C-Value         | 0.0241  | Check |
| PLAT984_ALERT_1_G | The O-f' =                                                 | 0.0412  | Deviates from the B&C-Value         | 0.0389  | Check |
| PLAT984_ALERT_1_G | The Pb-f' =                                                | -4.2646 | Deviates from the B&C-Value         | -4.4950 | Check |
| PLAT985_ALERT_1_G | The Al-f" =                                                | 0.1843  | Deviates from the B&C-Value         | 0.1873  | Check |
| PLAT985_ALERT_1_G | The Pb-f" =                                                | 7.1982  | Deviates from the B&C-Value         | 6.8412  | Check |
| PLAT985_ALERT_1_G | The S-f" =                                                 | 0.4242  | Deviates from the B&C-Value         | 0.4295  | Check |

- 
- 1 **ALERT level A** = Most likely a serious problem - resolve or explain  
13 **ALERT level B** = A potentially serious problem, consider carefully  
39 **ALERT level C** = Check. Ensure it is not caused by an omission or oversight  
101 **ALERT level G** = General information/check it is not something unexpected
- 13 ALERT type 1 CIF construction/syntax error, inconsistent or missing data  
58 ALERT type 2 Indicator that the structure model may be wrong or deficient  
20 ALERT type 3 Indicator that the structure quality may be low  
52 ALERT type 4 Improvement, methodology, query or suggestion  
11 ALERT type 5 Informative message, check
- 

## checkCIF publication errors

---

### Alert level A

PUBL004\_ALERT\_1\_A The contact author's name and address are missing,  
    \_publ\_contact\_author\_name and \_publ\_contact\_author\_address.  
PUBL005\_ALERT\_1\_A \_publ\_contact\_author\_email, \_publ\_contact\_author\_fax and  
    \_publ\_contact\_author\_phone are all missing.  
    At least one of these should be present.  
PUBL006\_ALERT\_1\_A \_publ\_requested\_journal is missing  
    e.g. 'Acta Crystallographica Section C'  
PUBL008\_ALERT\_1\_A \_publ\_section\_title is missing. Title of paper.

PUBL009\_ALERT\_1\_A \_publ\_author\_name is missing. List of author(s) name(s).  
PUBL010\_ALERT\_1\_A \_publ\_author\_address is missing. Author(s) address(es).  
PUBL012\_ALERT\_1\_A \_publ\_section\_abstract is missing.  
Abstract of paper in English.

---

7 **ALERT level A** = Data missing that is essential or data in wrong format  
0 **ALERT level G** = General alerts. Data that may be required is missing

---

## Publication of your CIF

You should attempt to resolve as many as possible of the alerts in all categories. Often the minor alerts point to easily fixed oversights, errors and omissions in your CIF or refinement strategy, so attention to these fine details can be worthwhile. In order to resolve some of the more serious problems it may be necessary to carry out additional measurements or structure refinements. However, the nature of your study may justify the reported deviations from journal submission requirements and the more serious of these should be commented upon in the discussion or experimental section of a paper or in the "special\_details" fields of the CIF. *checkCIF* was carefully designed to identify outliers and unusual parameters, but every test has its limitations and alerts that are not important in a particular case may appear. Conversely, the absence of alerts does not guarantee there are no aspects of the results needing attention. It is up to the individual to critically assess their own results and, if necessary, seek expert advice.

If level A alerts remain, which you believe to be justified deviations, and you intend to submit this CIF for publication in a journal, you should additionally insert an explanation in your CIF using the Validation Reply Form (VRF) below. This will allow your explanation to be considered as part of the review process.

## Validation response form

Please find below a validation response form (VRF) that can be filled in and pasted into your CIF.

```
# start Validation Reply Form
_vrf_PUBL004_GLOBAL
;
PROBLEM: The contact author's name and address are missing,
RESPONSE: ...
;
_vrf_PUBL005_GLOBAL
;
PROBLEM: _publ_contact_author_email, _publ_contact_author_fax and
RESPONSE: ...
;
_vrf_PUBL006_GLOBAL
;
PROBLEM: _publ_requested_journal is missing
RESPONSE: ...
;
_vrf_PUBL008_GLOBAL
;
PROBLEM: _publ_section_title is missing. Title of paper.
```

```
RESPONSE: ...
;
_vrf_PUBL009_GLOBAL
;
PROBLEM: _publ_author_name is missing. List of author(s) name(s).
RESPONSE: ...
;
_vrf_PUBL010_GLOBAL
;
PROBLEM: _publ_author_address is missing. Author(s) address(es).
RESPONSE: ...
;
_vrf_PUBL012_GLOBAL
;
PROBLEM: _publ_section_abstract is missing.
RESPONSE: ...
;
# end Validation Reply Form
```

If you wish to submit your CIF for publication in Acta Crystallographica Section C or E, you should upload your CIF via the web. If you wish to submit your CIF for publication in IUCrData you should upload your CIF via the web. If your CIF is to form part of a submission to another IUCr journal, you will be asked, either during electronic submission or by the Co-editor handling your paper, to upload your CIF via our web site.

---

**PLATON version of 15/07/2024; check.def file version of 15/07/2024**

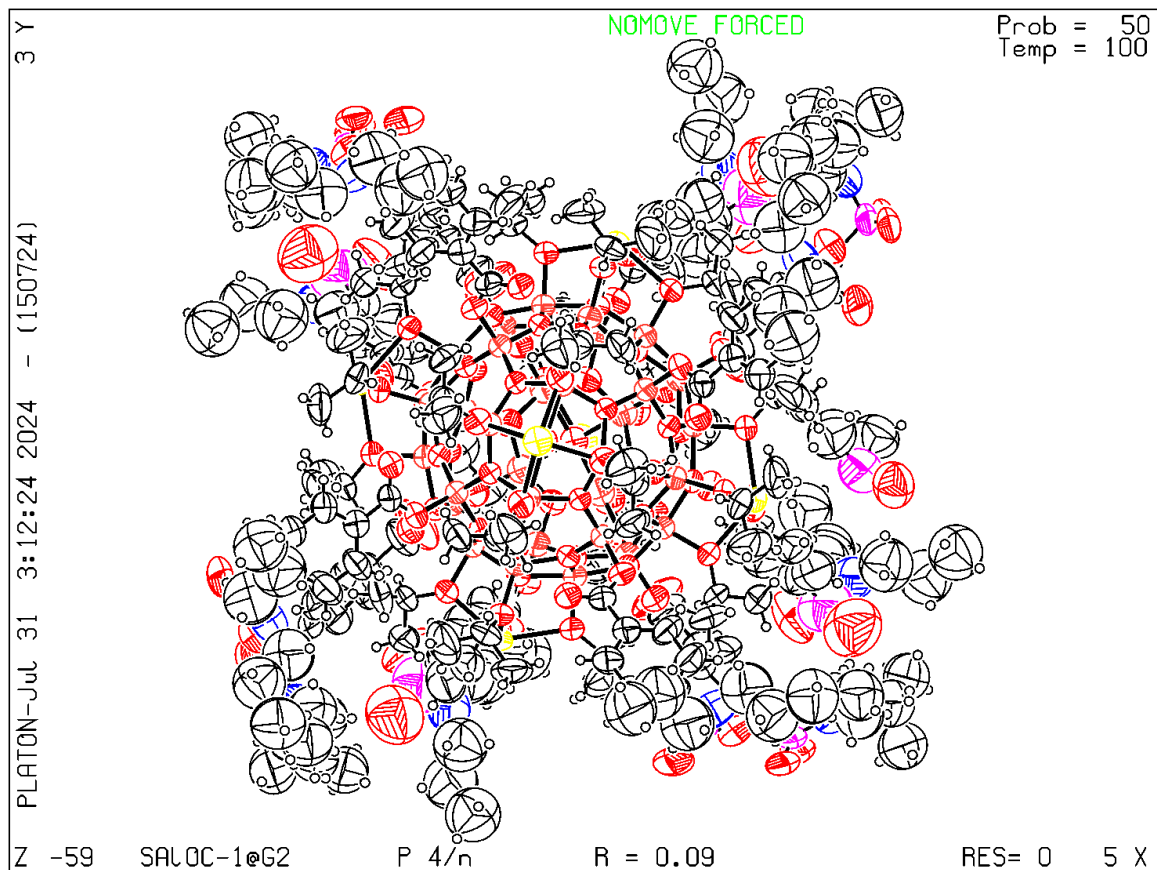

Supplement: Supplementary file 15 [file a98ff4753640d93a54875b11.pdf]
