# Supplementary material for: Precise Nanochemistry of Spherical Aluminum Oxo Clusters for Accurate Surface Guest Recognition and Release
Source: Research Square preprint supplement (doi:10.21203/rs.3.rs-4948547/v1), 2024-11-06

## checkCIF/PLATON report

Structure factors have been supplied for datablock(s) SAIOC-1@G7

THIS REPORT IS FOR GUIDANCE ONLY. IF USED AS PART OF A REVIEW PROCEDURE FOR PUBLICATION, IT SHOULD NOT REPLACE THE EXPERTISE OF AN EXPERIENCED CRYSTALLOGRAPHIC REFEREE.

No syntax errors found.      CIF dictionary      Interpreting this report

### Datablock: SAIOC-1@G7

---

Bond precision:      C-C = 0.0136 A

Wavelength=1.34050

Cell:                      a=30.0205 (4)              b=30.0205 (4)              c=19.1946 (4)  
                                    alpha=90                      beta=90                      gamma=90

Temperature:              100 K

|                        | Calculated                                                      | Reported                                         |
|------------------------|-----------------------------------------------------------------|--------------------------------------------------|
| Volume                 | 17298.8 (6)                                                     | 17298.8 (6)                                      |
| Space group            | P 4/n                                                           | P 4/n                                            |
| Hall group             | -P 4a                                                           | -P 4a                                            |
| Moiety formula         | C216 H364 Al32 N12 O110 Pb6<br>S12, 4(C7 H6 Cl2) [+<br>solvent] | C216 H364 Al32 N12 O110 Pb6<br>S12, 4(C7 H6 Cl2) |
| Sum formula            | C244 H388 Al32 Cl8 N12 O110<br>Pb6 S12 [+ solvent]              | C244 H388 Al32 Cl8 N12 O110<br>Pb6 S12           |
| Mr                     | 8024.56                                                         | 8024.46                                          |
| Dx, g cm <sup>-3</sup> | 1.541                                                           | 1.541                                            |
| Z                      | 2                                                               | 2                                                |
| Mu (mm <sup>-1</sup> ) | 5.520                                                           | 5.657                                            |
| F000                   | 8104.0                                                          | 8104.0                                           |
| F000'                  | 8088.70                                                         |                                                  |
| h, k, lmax             | 38, 38, 24                                                      | 38, 36, 24                                       |
| Nref                   | 19635                                                           | 18951                                            |
| Tmin, Tmax             |                                                                 | 1.000, 1.000                                     |
| Tmin'                  |                                                                 |                                                  |

Correction method= # Reported T Limits: Tmin=1.000 Tmax=1.000  
AbsCorr = SPHERE

Data completeness= 0.965

Theta(max)= 60.142

R(reflections)= 0.0755( 11674)

wR2(reflections)=  
0.2420( 18951)

S = 0.988

Npar= 1042

---

The following ALERTS were generated. Each ALERT has the format  
**test-name\_ALERT\_alert-type\_alert-level.**  
Click on the hyperlinks for more details of the test.

---

 **Alert level A**

PLAT971\_ALERT\_2\_A Check Calcd Resid. Dens. 0.72Ang From Pb2 3.57 eA-3

**Author Response:** These alerts are generated because of residual density peaks near the heaviest atoms in the structure, due to fourier termination ripples. After inspection, the residual electron density peak does not make chemical sense and will not affect the correct identification of the structure.

PLAT973\_ALERT\_2\_A Check Calcd Positive Resid. Density on Pb2 3.35 eA-3

**Author Response:** These alerts are generated because of residual density peaks near the heaviest atoms in the structure, due to fourier termination ripples. After inspection, the residual electron density peak does not make chemical sense and will not affect the correct identification of the structure.

PLAT973\_ALERT\_2\_A Check Calcd Positive Resid. Density on Pb1 3.00 eA-3

**Author Response:** These alerts are generated because of residual density peaks near the heaviest atoms in the structure, due to fourier termination ripples. After inspection, the residual electron density peak does not make chemical sense and will not affect the correct identification of the structure.

PLAT973\_ALERT\_2\_A Check Calcd Positive Resid. Density on Pb3 2.45 eA-3

**Author Response:** These alerts are generated because of residual density peaks near the heaviest atoms in the structure, due to fourier termination ripples. After inspection, the residual electron density peak does not make chemical sense and will not affect the correct identification of the structure.

---

 **Alert level B**

PLAT971\_ALERT\_2\_B Check Calcd Resid. Dens. 0.94Ang From Pb1 3.13 eA-3

**Author Response:** These alerts are generated because of residual density peaks near the heaviest atoms in the structure, due to fourier termination ripples. After inspection, the residual electron density peak does not make chemical sense and will not affect the correct identification of the structure.

PLAT971\_ALERT\_2\_B Check Calcd Resid. Dens. 0.77Ang From Pb1 3.08 eA-3

**Author Response:** These alerts are generated because of residual density peaks near the heaviest atoms in the structure, due to fourier termination ripples. After inspection, the residual electron density peak does not make chemical sense and will not affect the correct identification of the structure.

PLAT971\_ALERT\_2\_B Check Calcd Resid. Dens. 0.89Ang From Pb1 2.81 eA-3

**Author Response:** These alerts are generated because of residual density peaks near the heaviest atoms in the structure, due to fourier termination ripples. After inspection, the residual electron density peak does not make chemical sense and will not affect the correct identification of the structure.

PLAT971\_ALERT\_2\_B Check Calcd Resid. Dens. 1.08Ang From Pb3 2.68 eA-3

**Author Response:** These alerts are generated because of residual density peaks near the heaviest atoms in the structure, due to fourier termination ripples. After inspection, the residual electron density peak does not make chemical sense and will not affect the correct identification of the structure.

---

**Alert level C**

RADNW01\_ALERT\_1\_C The radiation wavelength lies outside the expected range for the supplied radiation type. Expected range 1.34130-1.34150 Wavelength given = 1.34050

|                   |                                                  |      |        |
|-------------------|--------------------------------------------------|------|--------|
| PLAT094_ALERT_2_C | Ratio of Maximum / Minimum Residual Density .... | 2.93 | Report |
| PLAT220_ALERT_2_C | NonSolvent Resd 1 C Ueq(max)/Ueq(min) Range      | 3.4  | Ratio  |
| PLAT220_ALERT_2_C | NonSolvent Resd 1 O Ueq(max)/Ueq(min) Range      | 3.7  | Ratio  |
| PLAT222_ALERT_3_C | NonSolvent Resd 1 H Uiso(max)/Uiso(min) Range    | 4.8  | Ratio  |
| PLAT241_ALERT_2_C | High 'MainMol' Ueq as Compared to Neighbors of   | C53  | Check  |
| PLAT241_ALERT_2_C | High 'MainMol' Ueq as Compared to Neighbors of   | C61  | Check  |
| PLAT241_ALERT_2_C | High 'MainMol' Ueq as Compared to Neighbors of   | C66  | Check  |
| PLAT242_ALERT_2_C | Low 'MainMol' Ueq as Compared to Neighbors of    | S1   | Check  |
| PLAT242_ALERT_2_C | Low 'MainMol' Ueq as Compared to Neighbors of    | O21  | Check  |
| PLAT242_ALERT_2_C | Low 'MainMol' Ueq as Compared to Neighbors of    | N2   | Check  |
| PLAT242_ALERT_2_C | Low 'MainMol' Ueq as Compared to Neighbors of    | N3   | Check  |
| PLAT242_ALERT_2_C | Low 'MainMol' Ueq as Compared to Neighbors of    | C16  | Check  |
| PLAT242_ALERT_2_C | Low 'MainMol' Ueq as Compared to Neighbors of    | C19  | Check  |
| PLAT242_ALERT_2_C | Low 'MainMol' Ueq as Compared to Neighbors of    | C22  | Check  |
| PLAT242_ALERT_2_C | Low 'MainMol' Ueq as Compared to Neighbors of    | C25  | Check  |
| PLAT242_ALERT_2_C | Low 'MainMol' Ueq as Compared to Neighbors of    | C34  | Check  |
| PLAT242_ALERT_2_C | Low 'MainMol' Ueq as Compared to Neighbors of    | C60  | Check  |

PLAT242\_ALERT\_2\_C Low 'MainMol' Ueq as Compared to Neighbors of C62 Check  
 PLAT242\_ALERT\_2\_C Low 'MainMol' Ueq as Compared to Neighbors of C72 Check  
 PLAT260\_ALERT\_2\_C Large Average Ueq of Residue Including Pb1 0.118 Check  
 PLAT260\_ALERT\_2\_C Large Average Ueq of Residue Including Cl1 0.145 Check  
 PLAT260\_ALERT\_2\_C Large Average Ueq of Residue Including Cl3 0.176 Check  
 PLAT342\_ALERT\_3\_C Low Bond Precision on C-C Bonds ..... 0.01363 Ang.  
 PLAT360\_ALERT\_2\_C Short C(sp3)-C(sp3) Bond C24 - C25 . 1.43 Ang.  
 PLAT360\_ALERT\_2\_C Short C(sp3)-C(sp3) Bond C71 - C72 . 1.38 Ang.  
 PLAT905\_ALERT\_3\_C Negative K value in the Analysis of Variance ... -0.431 Report  
 PLAT911\_ALERT\_3\_C Missing FCF Refl Between Thmin & STh/L= 0.600 82 Report  
 -1 3 0, 1 3 0, 0 4 0, 2 4 0, 4 4 0, 5 5 0,  
 0 6 0, 1 11 0, 0 12 0, 0 2 1, 1 2 1, 1 3 1,  
 -3 4 1, -2 4 1, 2 4 1, -3 5 1, -1 5 1, 1 5 1,  
 5 5 1, -1 6 1, -4 7 1, 5 7 1, -3 9 1, 3 14 1,  
 0 1 2, 1 1 2, 2 2 2, 0 3 2, 4 4 2, -2 5 2,  
 1 5 2, 4 5 2, 2 7 2, -3 8 2, -2 10 2, 4 11 2,  
 -5 12 2, 0 12 2, 4 12 2, -3 13 2, 8 13 2, 9 14 2,  
 0 15 2, 1 1 3, 2 2 3, 0 3 3, -1 4 3, -2 6 3,  
 8 8 3, 1 3 4, -1 5 4, 3 6 4, -2 7 4, 7 9 4,  
 0 2 5, -5 6 5, 6 9 5, 0 0 6, 2 3 6, 0 4 6,  
 2 4 6, 0 6 6, -1 8 6, -6 9 6, -2 10 6, -1 5 7,  
 -3 7 7, -2 5 8, -4 11 8, -12 25 10, -11 25 10, -10 25 10,  
 -8 14 11, -11 23 11, -10 23 11, -14 24 11, -13 24 11, -12 24 11,  
 -17 24 13, -10 14 14, 0 0 16, 5 21 18,  
 PLAT971\_ALERT\_2\_C Check Calcd Resid. Dens. 1.08Ang From Pb2 2.49 eA-3

**Author Response:** These alerts are generated because of residual density peaks near the heaviest atoms in the structure, due to fourier termination ripples. After inspection, the residual electron density peak does not make chemical sense and will not affect the correct identification of the structure.

PLAT971\_ALERT\_2\_C Check Calcd Resid. Dens. 0.75Ang From Pb2 2.27 eA-3

**Author Response:** These alerts are generated because of residual density peaks near the heaviest atoms in the structure, due to fourier termination ripples. After inspection, the residual electron density peak does not make chemical sense and will not affect the correct identification of the structure.

PLAT971\_ALERT\_2\_C Check Calcd Resid. Dens. 0.83Ang From Pb1 2.20 eA-3

**Author Response:** These alerts are generated because of residual density peaks near the heaviest atoms in the structure, due to fourier termination ripples. After inspection, the residual electron density peak does not make chemical sense and will not affect the correct identification of the structure.

PLAT971\_ALERT\_2\_C Check Calcd Resid. Dens. 0.87Ang From Pb1 2.16 eA-3

**Author Response: These alerts are generated because of residual density peaks near the heaviest atoms in the structure, due to fourier termination ripples. After inspection, the residual electron density peak does not make chemical sense and will not affect the correct identification of the structure.**

PLAT971\_ALERT\_2\_C Check Calcd Resid. Dens. 0.90Ang From Pb3 2.07 eA-3

**Author Response: These alerts are generated because of residual density peaks near the heaviest atoms in the structure, due to fourier termination ripples. After inspection, the residual electron density peak does not make chemical sense and will not affect the correct identification of the structure.**

PLAT971\_ALERT\_2\_C Check Calcd Resid. Dens. 1.03Ang From Pb3 1.97 eA-3

**Author Response: These alerts are generated because of residual density peaks near the heaviest atoms in the structure, due to fourier termination ripples. After inspection, the residual electron density peak does not make chemical sense and will not affect the correct identification of the structure.**

PLAT971\_ALERT\_2\_C Check Calcd Resid. Dens. 0.84Ang From Pb1 1.52 eA-3

**Author Response: These alerts are generated because of residual density peaks near the heaviest atoms in the structure, due to fourier termination ripples. After inspection, the residual electron density peak does not make chemical sense and will not affect the correct identification of the structure.**

PLAT977\_ALERT\_2\_C Check Negative Difference Density on H19 . -0.34 eA-3  
PLAT977\_ALERT\_2\_C Check Negative Difference Density on H23A . -0.32 eA-3  
PLAT977\_ALERT\_2\_C Check Negative Difference Density on H38B . -0.33 eA-3

---

**Alert level G**

ABSMU01\_ALERT\_1\_G Calculation of \_exptl\_absorpt\_correction\_mu  
not performed for this radiation type.

|                   |                                                  |        |        |
|-------------------|--------------------------------------------------|--------|--------|
| PLAT002_ALERT_2_G | Number of Distance or Angle Restraints on AtSite | 34     | Note   |
| PLAT003_ALERT_2_G | Number of Uiso or U(i,j) Restrained non-H Atoms  | 34     | Report |
| PLAT007_ALERT_5_G | Number of Unrefined Donor-H Atoms .....          | 2      | Report |
|                   | H5 H19                                           |        |        |
| PLAT051_ALERT_1_G | Mu(calc) and Mu(CIF) Ratio Differs from 1.0 by . | 2.42   | %      |
| PLAT072_ALERT_2_G | SHELXL First Parameter in WGHT Unusually Large   | 0.17   | Report |
| PLAT172_ALERT_4_G | The CIF-Embedded .res File Contains DFIX Records | 48     | Report |
| PLAT174_ALERT_4_G | The CIF-Embedded .res File Contains FLAT Records | 2      | Report |
| PLAT177_ALERT_4_G | The CIF-Embedded .res File Contains DELU Records | 5      | Report |
| PLAT178_ALERT_4_G | The CIF-Embedded .res File Contains SIMU Records | 4      | Report |
| PLAT186_ALERT_4_G | The CIF-Embedded .res File Contains ISOR Records | 4      | Report |
| PLAT187_ALERT_4_G | The CIF-Embedded .res File Contains RIGU Records | 2      | Report |
| PLAT188_ALERT_3_G | A Non-default SIMU Restraint Value has been used | 0.0010 | Report |
| PLAT188_ALERT_3_G | A Non-default SIMU Restraint Value has been used | 0.0100 | Report |
| PLAT188_ALERT_3_G | A Non-default SIMU Restraint Value has been used | 0.0100 | Report |

|                   |                     |                      |           |                     |                |        |       |
|-------------------|---------------------|----------------------|-----------|---------------------|----------------|--------|-------|
| PLAT188_ALERT_3_G | A Non-default       | SIMU                 | Restraint | Value has been used | 0.0100         | Report |       |
| PLAT190_ALERT_3_G | A Non-default       | RIGU                 | Restraint | Value for First Par | 0.0100         | Report |       |
| PLAT190_ALERT_3_G | A Non-default       | RIGU                 | Restraint | Value for SecondPar | 0.0200         | Report |       |
| PLAT190_ALERT_3_G | A Non-default       | RIGU                 | Restraint | Value for First Par | 0.0100         | Report |       |
| PLAT190_ALERT_3_G | A Non-default       | RIGU                 | Restraint | Value for SecondPar | 0.0200         | Report |       |
| PLAT192_ALERT_3_G | A Non-default       | DELU                 | Restraint | Value for First Par | 0.0010         | Report |       |
| PLAT192_ALERT_3_G | A Non-default       | DELU                 | Restraint | Value for SecondPar | 0.0020         | Report |       |
| PLAT192_ALERT_3_G | A Non-default       | DELU                 | Restraint | Value for SecondPar | 0.0200         | Report |       |
| PLAT192_ALERT_3_G | A Non-default       | DELU                 | Restraint | Value for SecondPar | 0.0200         | Report |       |
| PLAT192_ALERT_3_G | A Non-default       | DELU                 | Restraint | Value for SecondPar | 0.0200         | Report |       |
| PLAT299_ALERT_4_G | Atom Site Occupancy | Constrained at ..... |           |                     | 0.5            | Check  |       |
|                   | C11                 | C12                  | C1        | C2                  | C3             | C4     |       |
|                   | C7                  | H1A                  | H1B       | H1C                 | H4             | H5A    |       |
|                   | C14                 | C8                   | C9        | C10                 | C11            | C12    |       |
|                   | H8A                 | H8B                  | H8C       | H11                 | H12            | H13    |       |
| PLAT300_ALERT_4_G | Atom Site Occupancy | of C38               |           |                     | Constrained at | 0.75   | Check |
| PLAT300_ALERT_4_G | Atom Site Occupancy | of C39               |           |                     | Constrained at | 0.75   | Check |
| PLAT300_ALERT_4_G | Atom Site Occupancy | of C55               |           |                     | Constrained at | 0.75   | Check |
| PLAT300_ALERT_4_G | Atom Site Occupancy | of C69               |           |                     | Constrained at | 0.75   | Check |
| PLAT300_ALERT_4_G | Atom Site Occupancy | of C70               |           |                     | Constrained at | 0.75   | Check |
| PLAT300_ALERT_4_G | Atom Site Occupancy | of C40               |           |                     | Constrained at | 0.25   | Check |
| PLAT300_ALERT_4_G | Atom Site Occupancy | of C41               |           |                     | Constrained at | 0.25   | Check |
| PLAT300_ALERT_4_G | Atom Site Occupancy | of C54               |           |                     | Constrained at | 0.25   | Check |
| PLAT300_ALERT_4_G | Atom Site Occupancy | of C67               |           |                     | Constrained at | 0.25   | Check |
| PLAT300_ALERT_4_G | Atom Site Occupancy | of C68               |           |                     | Constrained at | 0.25   | Check |
| PLAT300_ALERT_4_G | Atom Site Occupancy | of H37A              |           |                     | Constrained at | 0.75   | Check |
| PLAT300_ALERT_4_G | Atom Site Occupancy | of H37B              |           |                     | Constrained at | 0.75   | Check |
| PLAT300_ALERT_4_G | Atom Site Occupancy | of H38A              |           |                     | Constrained at | 0.75   | Check |
| PLAT300_ALERT_4_G | Atom Site Occupancy | of H38B              |           |                     | Constrained at | 0.75   | Check |
| PLAT300_ALERT_4_G | Atom Site Occupancy | of H39A              |           |                     | Constrained at | 0.75   | Check |
| PLAT300_ALERT_4_G | Atom Site Occupancy | of H39B              |           |                     | Constrained at | 0.75   | Check |
| PLAT300_ALERT_4_G | Atom Site Occupancy | of H39C              |           |                     | Constrained at | 0.75   | Check |
| PLAT300_ALERT_4_G | Atom Site Occupancy | of H53A              |           |                     | Constrained at | 0.75   | Check |
| PLAT300_ALERT_4_G | Atom Site Occupancy | of H53B              |           |                     | Constrained at | 0.75   | Check |
| PLAT300_ALERT_4_G | Atom Site Occupancy | of H55A              |           |                     | Constrained at | 0.75   | Check |
| PLAT300_ALERT_4_G | Atom Site Occupancy | of H55B              |           |                     | Constrained at | 0.75   | Check |
| PLAT300_ALERT_4_G | Atom Site Occupancy | of H55C              |           |                     | Constrained at | 0.75   | Check |
| PLAT300_ALERT_4_G | Atom Site Occupancy | of H66A              |           |                     | Constrained at | 0.75   | Check |
| PLAT300_ALERT_4_G | Atom Site Occupancy | of H66B              |           |                     | Constrained at | 0.75   | Check |
| PLAT300_ALERT_4_G | Atom Site Occupancy | of H69A              |           |                     | Constrained at | 0.75   | Check |
| PLAT300_ALERT_4_G | Atom Site Occupancy | of H69B              |           |                     | Constrained at | 0.75   | Check |
| PLAT300_ALERT_4_G | Atom Site Occupancy | of H70A              |           |                     | Constrained at | 0.75   | Check |
| PLAT300_ALERT_4_G | Atom Site Occupancy | of H70B              |           |                     | Constrained at | 0.75   | Check |
| PLAT300_ALERT_4_G | Atom Site Occupancy | of H70C              |           |                     | Constrained at | 0.75   | Check |
| PLAT300_ALERT_4_G | Atom Site Occupancy | of H37C              |           |                     | Constrained at | 0.25   | Check |
| PLAT300_ALERT_4_G | Atom Site Occupancy | of H37D              |           |                     | Constrained at | 0.25   | Check |
| PLAT300_ALERT_4_G | Atom Site Occupancy | of H40A              |           |                     | Constrained at | 0.25   | Check |
| PLAT300_ALERT_4_G | Atom Site Occupancy | of H40B              |           |                     | Constrained at | 0.25   | Check |
| PLAT300_ALERT_4_G | Atom Site Occupancy | of H41A              |           |                     | Constrained at | 0.25   | Check |
| PLAT300_ALERT_4_G | Atom Site Occupancy | of H41B              |           |                     | Constrained at | 0.25   | Check |
| PLAT300_ALERT_4_G | Atom Site Occupancy | of H41C              |           |                     | Constrained at | 0.25   | Check |
| PLAT300_ALERT_4_G | Atom Site Occupancy | of H53C              |           |                     | Constrained at | 0.25   | Check |
| PLAT300_ALERT_4_G | Atom Site Occupancy | of H53D              |           |                     | Constrained at | 0.25   | Check |
| PLAT300_ALERT_4_G | Atom Site Occupancy | of H54A              |           |                     | Constrained at | 0.25   | Check |
| PLAT300_ALERT_4_G | Atom Site Occupancy | of H54B              |           |                     | Constrained at | 0.25   | Check |
| PLAT300_ALERT_4_G | Atom Site Occupancy | of H54C              |           |                     | Constrained at | 0.25   | Check |

|                   |                                                  |                   |       |           |
|-------------------|--------------------------------------------------|-------------------|-------|-----------|
| PLAT300_ALERT_4_G | Atom Site Occupancy of H66C                      | Constrained at    | 0.25  | Check     |
| PLAT300_ALERT_4_G | Atom Site Occupancy of H66D                      | Constrained at    | 0.25  | Check     |
| PLAT300_ALERT_4_G | Atom Site Occupancy of H67A                      | Constrained at    | 0.25  | Check     |
| PLAT300_ALERT_4_G | Atom Site Occupancy of H67B                      | Constrained at    | 0.25  | Check     |
| PLAT300_ALERT_4_G | Atom Site Occupancy of H68A                      | Constrained at    | 0.25  | Check     |
| PLAT300_ALERT_4_G | Atom Site Occupancy of H68B                      | Constrained at    | 0.25  | Check     |
| PLAT300_ALERT_4_G | Atom Site Occupancy of H68C                      | Constrained at    | 0.25  | Check     |
| PLAT301_ALERT_3_G | Main Residue Disorder .....                      | (Resd 1)          | 5%    | Note      |
| PLAT302_ALERT_4_G | Anion/Solvent/Minor-Residue Disorder             | (Resd 2)          | 100%  | Note      |
| PLAT302_ALERT_4_G | Anion/Solvent/Minor-Residue Disorder             | (Resd 3)          | 100%  | Note      |
| PLAT304_ALERT_4_G | Non-Integer Number of Atoms in .....             | (Resd 2)          | 7.50  | Check     |
| PLAT304_ALERT_4_G | Non-Integer Number of Atoms in .....             | (Resd 3)          | 7.50  | Check     |
| PLAT410_ALERT_2_G | Short Intra H...H Contact H35A ..H40A            | .                 | 1.51  | Ang.      |
|                   |                                                  | x,y,z =           | 1_555 | Check     |
| PLAT412_ALERT_2_G | Short Intra XH3 .. XHn H34B ..H41B               | .                 | 1.63  | Ang.      |
|                   |                                                  | x,y,z =           | 1_555 | Check     |
| PLAT413_ALERT_2_G | Short Inter XH3 .. XHn H36B ..H54C               | .                 | 2.01  | Ang.      |
|                   |                                                  | y,1/2-x,1+z =     | 4_556 | Check     |
| PLAT413_ALERT_2_G | Short Inter XH3 .. XHn H55B ..H63C               | .                 | 1.59  | Ang.      |
|                   |                                                  | 3/2-x,1/2-y,z =   | 2_655 | Check     |
| PLAT413_ALERT_2_G | Short Inter XH3 .. XHn H1A ..H65A                | .                 | 2.05  | Ang.      |
|                   |                                                  | x,y,z =           | 1_555 | Check     |
| PLAT432_ALERT_2_G | Short Inter X...Y Contact S3 ..C41               | .                 | 3.29  | Ang.      |
|                   |                                                  | 1/2-y,x,-1+z =    | 3_554 | Check     |
| PLAT432_ALERT_2_G | Short Inter X...Y Contact O29 ..C41              | .                 | 2.09  | Ang.      |
|                   |                                                  | 1/2-y,x,-1+z =    | 3_554 | Check     |
| PLAT432_ALERT_2_G | Short Inter X...Y Contact C45 ..C40              | .                 | 3.11  | Ang.      |
|                   |                                                  | 1/2-y,x,-1+z =    | 3_554 | Check     |
| PLAT605_ALERT_4_G | Largest Solvent Accessible VOID in the Structure |                   | 170   | A**3      |
| PLAT721_ALERT_1_G | Bond Calc 0.97000, Rep 0.98020 Dev...            |                   | 0.01  | Ang.      |
|                   | C54 -H54C                                        | 1_555 1_555 ..... | #     | 272 Check |
| PLAT721_ALERT_1_G | Bond Calc 1.00000, Rep 0.98990 Dev...            |                   | 0.01  | Ang.      |
|                   | C40 -H40A                                        | 1_555 1_555 ..... | #     | 273 Check |
| PLAT721_ALERT_1_G | Bond Calc 0.98000, Rep 0.99020 Dev...            |                   | 0.01  | Ang.      |
|                   | C40 -H40B                                        | 1_555 1_555 ..... | #     | 274 Check |
| PLAT721_ALERT_1_G | Bond Calc 0.97000, Rep 0.98010 Dev...            |                   | 0.01  | Ang.      |
|                   | C41 -H41A                                        | 1_555 1_555 ..... | #     | 276 Check |
| PLAT794_ALERT_5_G | Tentative Bond Valency for Pb2                   | (II)              | 2.03  | Info      |
| PLAT794_ALERT_5_G | Tentative Bond Valency for Pb3                   | (II)              | 2.07  | Info      |
| PLAT794_ALERT_5_G | Tentative Bond Valency for Al2                   | (III)             | 2.73  | Info      |
| PLAT794_ALERT_5_G | Tentative Bond Valency for Al3                   | (III)             | 2.77  | Info      |
| PLAT794_ALERT_5_G | Tentative Bond Valency for Al4                   | (III)             | 2.75  | Info      |
| PLAT794_ALERT_5_G | Tentative Bond Valency for Al6                   | (III)             | 2.76  | Info      |
| PLAT794_ALERT_5_G | Tentative Bond Valency for Al7                   | (III)             | 2.97  | Info      |
| PLAT794_ALERT_5_G | Tentative Bond Valency for Al8                   | (III)             | 2.86  | Info      |
| PLAT860_ALERT_3_G | Number of Least-Squares Restraints .....         |                   | 535   | Note      |
| PLAT868_ALERT_4_G | ALERTS Due to the Use of _smtbx_masks            | Suppressed        | !     | Info      |
| PLAT910_ALERT_3_G | Missing # of FCF Reflection(s) Below Theta(Min). |                   | 2     | Note      |
|                   | 1 1 0, 0 0 1,                                    |                   |       |           |
| PLAT912_ALERT_4_G | Missing # of FCF Reflections Above STh/L=        | 0.600             | 593   | Note      |
| PLAT933_ALERT_2_G | Number of HKL-OMIT Records in Embedded .res File |                   | 65    | Note      |
|                   | 0 1 2, -2 6 3, -3 7 7, 1 5 1, 0 2 5, -1 4 3,     |                   |       |           |
|                   | -2 10 2, 1 1 3, -1 5 1, 2 2 2, 5 5 1, -2 5 2,    |                   |       |           |
|                   | 2 7 2, -1 5 4, 1 2 1, 5 5 0, -1 8 6, 1 3 1,      |                   |       |           |
|                   | 0 2 1, -3 4 1, 0 4 0, -1 6 1, 0 6 0, -1 5 7,     |                   |       |           |
|                   | 4 11 2, -5 6 5, 4 5 2, 3 14 1, 1 3 4, -4 7 1,    |                   |       |           |
|                   | 0 12 2, 0 3 2, 0 0 6, 0 4 6, -2 7 4, 8 13 2,     |                   |       |           |

```

      8 8 3,  2 4 1, -8 35 8,  6 9 5, -2 5 8,  5 7 1,
     -4 11 8, -6 9 6,  4 4 2, -3 9 1,  1 1 2,  1 5 2,
      2 3 6,  4 12 2,
PLAT941_ALERT_3_G Average HKL Measurement Multiplicity .....      3.1 Low
PLAT951_ALERT_5_G Calculated (ThMax) and CIF-Reported Kmax Differ      2 Units
PLAT969_ALERT_5_G The 'Henn et al.' R-Factor-gap value .....      4.502 Note
      Predicted wR2: Based on SigI**2  5.38 or SHELX Weight 24.51
PLAT978_ALERT_2_G Number C-C Bonds with Positive Residual Density.      0 Info
PLAT984_ALERT_1_G The C-f' = 0.0147 Deviates from the B&C-Value 0.0137 Check
PLAT984_ALERT_1_G The Cl-f' = 0.3292 Deviates from the B&C-Value 0.3281 Check
PLAT984_ALERT_1_G The N-f' = 0.0253 Deviates from the B&C-Value 0.0241 Check
PLAT984_ALERT_1_G The O-f' = 0.0412 Deviates from the B&C-Value 0.0389 Check
PLAT984_ALERT_1_G The Pb-f' = -4.2646 Deviates from the B&C-Value -4.4950 Check
PLAT985_ALERT_1_G The Al-f" = 0.1843 Deviates from the B&C-Value 0.1873 Check
PLAT985_ALERT_1_G The Cl-f" = 0.5397 Deviates from the B&C-Value 0.5435 Check
PLAT985_ALERT_1_G The Pb-f" = 7.1982 Deviates from the B&C-Value 6.8412 Check
PLAT985_ALERT_1_G The S-f" = 0.4242 Deviates from the B&C-Value 0.4295 Check

```

---

4 **ALERT level A** = Most likely a serious problem - resolve or explain  
4 **ALERT level B** = A potentially serious problem, consider carefully  
38 **ALERT level C** = Check. Ensure it is not caused by an omission or oversight  
119 **ALERT level G** = General information/check it is not something unexpected

16 ALERT type 1 CIF construction/syntax error, inconsistent or missing data  
54 ALERT type 2 Indicator that the structure model may be wrong or deficient  
22 ALERT type 3 Indicator that the structure quality may be low  
62 ALERT type 4 Improvement, methodology, query or suggestion  
11 ALERT type 5 Informative message, check

---

## checkCIF publication errors

---

### Alert level A

PUBL004\_ALERT\_1\_A The contact author's name and address are missing,  
    \_publ\_contact\_author\_name and \_publ\_contact\_author\_address.  
PUBL005\_ALERT\_1\_A \_publ\_contact\_author\_email, \_publ\_contact\_author\_fax and  
    \_publ\_contact\_author\_phone are all missing.  
    At least one of these should be present.  
PUBL006\_ALERT\_1\_A \_publ\_requested\_journal is missing  
    e.g. 'Acta Crystallographica Section C'  
PUBL008\_ALERT\_1\_A \_publ\_section\_title is missing. Title of paper.  
PUBL009\_ALERT\_1\_A \_publ\_author\_name is missing. List of author(s) name(s).  
PUBL010\_ALERT\_1\_A \_publ\_author\_address is missing. Author(s) address(es).  
PUBL012\_ALERT\_1\_A \_publ\_section\_abstract is missing.  
    Abstract of paper in English.

---

7 **ALERT level A** = Data missing that is essential or data in wrong format  
0 **ALERT level G** = General alerts. Data that may be required is missing

---



## Publication of your CIF

You should attempt to resolve as many as possible of the alerts in all categories. Often the minor alerts point to easily fixed oversights, errors and omissions in your CIF or refinement strategy, so attention to these fine details can be worthwhile. In order to resolve some of the more serious problems it may be necessary to carry out additional measurements or structure refinements. However, the nature of your study may justify the reported deviations from journal submission requirements and the more serious of these should be commented upon in the discussion or experimental section of a paper or in the "special\_details" fields of the CIF. *checkCIF* was carefully designed to identify outliers and unusual parameters, but every test has its limitations and alerts that are not important in a particular case may appear. Conversely, the absence of alerts does not guarantee there are no aspects of the results needing attention. It is up to the individual to critically assess their own results and, if necessary, seek expert advice.

If level A alerts remain, which you believe to be justified deviations, and you intend to submit this CIF for publication in a journal, you should additionally insert an explanation in your CIF using the Validation Reply Form (VRF) below. This will allow your explanation to be considered as part of the review process.

## Validation response form

Please find below a validation response form (VRF) that can be filled in and pasted into your CIF.

```
# start Validation Reply Form
_vrf_PUBL004_GLOBAL
;
PROBLEM: The contact author's name and address are missing,
RESPONSE: ...
;
_vrf_PUBL005_GLOBAL
;
PROBLEM: _publ_contact_author_email, _publ_contact_author_fax and
RESPONSE: ...
;
_vrf_PUBL006_GLOBAL
;
PROBLEM: _publ_requested_journal is missing
RESPONSE: ...
;
_vrf_PUBL008_GLOBAL
;
PROBLEM: _publ_section_title is missing. Title of paper.
RESPONSE: ...
;
_vrf_PUBL009_GLOBAL
;
PROBLEM: _publ_author_name is missing. List of author(s) name(s).
RESPONSE: ...
;
_vrf_PUBL010_GLOBAL
;
PROBLEM: _publ_author_address is missing. Author(s) address(es).
```

```
RESPONSE: ...  
;  
_vrf_PUBL012_GLOBAL  
;  
PROBLEM: _publ_section_abstract is missing.  
RESPONSE: ...  
;  
# end Validation Reply Form
```

If you wish to submit your CIF for publication in Acta Crystallographica Section C or E, you should upload your CIF via the web. If you wish to submit your CIF for publication in IUCrData you should upload your CIF via the web. If your CIF is to form part of a submission to another IUCr journal, you will be asked, either during electronic submission or by the Co-editor handling your paper, to upload your CIF via our web site.

---

**PLATON version of 15/07/2024; check.def file version of 15/07/2024**

Datablock SAIOC-1@G7 - ellipsoid plot

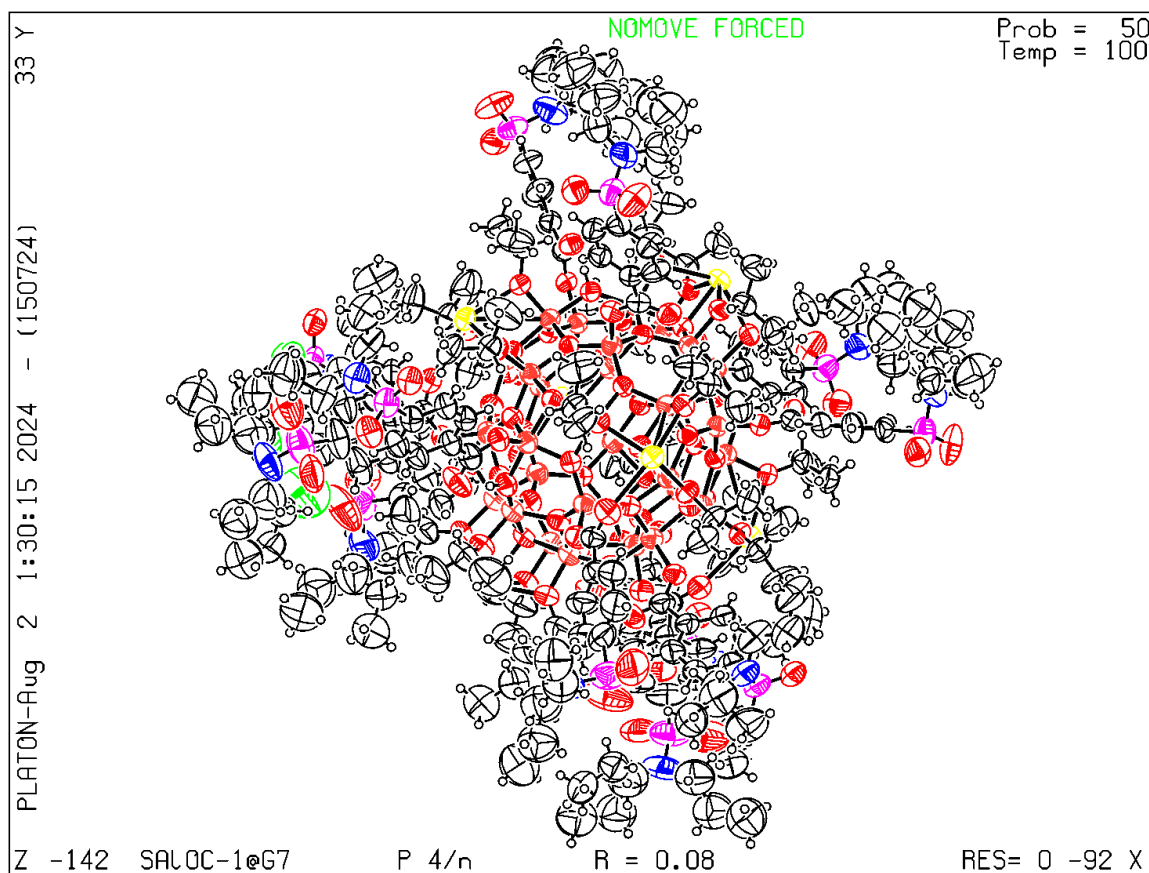

Supplement: Supplementary file 16 [file beba57a3c6073e29742fb3fb.pdf]
