# Supplementary material for: Precise Nanochemistry of Spherical Aluminum Oxo Clusters for Accurate Surface Guest Recognition and Release
Source: Research Square preprint supplement (doi:10.21203/rs.3.rs-4948547/v1), 2024-11-06

## checkCIF/PLATON report

Structure factors have been supplied for datablock(s) SAIOC-1@G12

THIS REPORT IS FOR GUIDANCE ONLY. IF USED AS PART OF A REVIEW PROCEDURE FOR PUBLICATION, IT SHOULD NOT REPLACE THE EXPERTISE OF AN EXPERIENCED CRYSTALLOGRAPHIC REFEREE.

No syntax errors found.      CIF dictionary      Interpreting this report

### Datablock: SAIOC-1@G12

---

|                        |                                                                 |                                                  |                          |
|------------------------|-----------------------------------------------------------------|--------------------------------------------------|--------------------------|
| Bond precision:        | C-C = 0.0121 Å                                                  | Wavelength=1.34050                               |                          |
| Cell:                  | a=29.9771(3)<br>alpha=90                                        | b=29.9771(3)<br>beta=90                          | c=19.4854(3)<br>gamma=90 |
| Temperature:           | 100 K                                                           |                                                  |                          |
|                        | Calculated                                                      | Reported                                         |                          |
| Volume                 | 17510.1(4)                                                      | 17510.1(4)                                       |                          |
| Space group            | P 4/n                                                           | P 4/n                                            |                          |
| Hall group             | -P 4a                                                           | -P 4a                                            |                          |
| Moiety formula         | C216 H360 Al32 N12 O110 Pb6<br>S12, 3(C10 H8 N2) [+<br>solvent] | C216 H360 Al32 N12 O110 Pb6<br>S12, 3(C10 H8 N2) |                          |
| Sum formula            | C246 H384 Al32 N18 O110 Pb6<br>S12 [+ solvent]                  | C246 H384 Al32 N18 O110 Pb6<br>S12               |                          |
| Mr                     | 7845.01                                                         | 7844.91                                          |                          |
| Dx, g cm <sup>-3</sup> | 1.488                                                           | 1.488                                            |                          |
| Z                      | 2                                                               | 2                                                |                          |
| Mu (mm <sup>-1</sup> ) | 5.082                                                           | 5.225                                            |                          |
| F000                   | 7932.0                                                          | 7932.0                                           |                          |
| F000'                  | 7911.62                                                         |                                                  |                          |
| h, k, lmax             | 35, 35, 22                                                      | 32, 35, 22                                       |                          |
| Nref                   | 14929                                                           | 14897                                            |                          |
| Tmin, Tmax             |                                                                 | 1.000, 1.000                                     |                          |
| Tmin'                  |                                                                 |                                                  |                          |
| Correction method=     | # Reported T Limits: Tmin=1.000 Tmax=1.000                      |                                                  |                          |
| AbsCorr =              | SPHERE                                                          |                                                  |                          |
| Data completeness=     | 0.998                                                           | Theta(max)= 52.048                               |                          |

R(reflections)= 0.0582( 12193)

wR2(reflections)=  
0.1635( 14897)

S = 1.038

Npar= 967

---

The following ALERTS were generated. Each ALERT has the format

**test-name\_ALERT\_alert-type\_alert-level.**

Click on the hyperlinks for more details of the test.

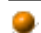

#### Alert level B

PLAT242\_ALERT\_2\_B Low 'MainMol' Ueq as Compared to Neighbors of C24 Check

**Author Response:** These alerts are generated because of a slight unresolved disorder caused by free rotation of the flexible chain at the end of the ligand. Some refi commands such as DELU, SIMU and ISOR were used to address such abnormal Ueq value, but failed. After inspection, this does not affect the correct assign of atom types.

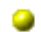

#### Alert level C

RADNW01\_ALERT\_1\_C The radiation wavelength lies outside the expected range  
for the supplied radiation type. Expected range 1.34130-1.34150  
Wavelength given = 1.34050

THETM01\_ALERT\_3\_C The value of sine(theta\_max)/wavelength is less than 0.590  
Calculated sin(theta\_max)/wavelength = 0.5882

|                   |                                                  |      |        |
|-------------------|--------------------------------------------------|------|--------|
| PLAT094_ALERT_2_C | Ratio of Maximum / Minimum Residual Density .... | 2.58 | Report |
| PLAT213_ALERT_2_C | Atom O24 has ADP max/min Ratio .....             | 3.5  | prolat |
| PLAT215_ALERT_3_C | Disordered C54 has ADP max/min Ratio .....       | 3.9  | Note   |
| PLAT220_ALERT_2_C | NonSolvent Resd 1 C Ueq(max)/Ueq(min) Range      | 4.3  | Ratio  |
| PLAT220_ALERT_2_C | NonSolvent Resd 1 O Ueq(max)/Ueq(min) Range      | 5.7  | Ratio  |
| PLAT222_ALERT_3_C | NonSolvent Resd 1 H Uiso(max)/Uiso(min) Range    | 6.9  | Ratio  |
| PLAT241_ALERT_2_C | High 'MainMol' Ueq as Compared to Neighbors of   | C40  | Check  |
| PLAT241_ALERT_2_C | High 'MainMol' Ueq as Compared to Neighbors of   | C51  | Check  |
| PLAT242_ALERT_2_C | Low 'MainMol' Ueq as Compared to Neighbors of    | S2   | Check  |

**Author Response:** These alerts are generated because of a slight unresolved disorder caused by free rotation of the flexible chain at the end of the ligand. Some refi commands such as DELU, SIMU and ISOR were used to address such abnormal Ueq value, but failed. After inspection, this does not affect the correct assign of atom types.

PLAT242\_ALERT\_2\_C Low 'MainMol' Ueq as Compared to Neighbors of

S3 Check

**Author Response:** These alerts are generated because of a slight unresolved disorder caused by free rotation of the flexible chain at the end of the ligand. Some refi commands such as DELU, SIMU and ISOR were used to address such abnormal Ueq value, but failed. After inspection, this does not affect the correct assign of atom types.

PLAT242\_ALERT\_2\_C Low 'MainMol' Ueq as Compared to Neighbors of N1 Check

**Author Response:** These alerts are generated because of a slight unresolved disorder caused by free rotation of the flexible chain at the end of the ligand. Some refi commands such as DELU, SIMU and ISOR were used to address such abnormal Ueq value, but failed. After inspection, this does not affect the correct assign of atom types.

PLAT242\_ALERT\_2\_C Low 'MainMol' Ueq as Compared to Neighbors of N2 Check

**Author Response:** These alerts are generated because of a slight unresolved disorder caused by free rotation of the flexible chain at the end of the ligand. Some refi commands such as DELU, SIMU and ISOR were used to address such abnormal Ueq value, but failed. After inspection, this does not affect the correct assign of atom types.

PLAT242\_ALERT\_2\_C Low 'MainMol' Ueq as Compared to Neighbors of N6 Check

**Author Response:** These alerts are generated because of a slight unresolved disorder caused by free rotation of the flexible chain at the end of the ligand. Some refi commands such as DELU, SIMU and ISOR were used to address such abnormal Ueq value, but failed. After inspection, this does not affect the correct assign of atom types.

PLAT242\_ALERT\_2\_C Low 'MainMol' Ueq as Compared to Neighbors of C18 Check

**Author Response:** These alerts are generated because of a slight unresolved disorder caused by free rotation of the flexible chain at the end of the ligand. Some refi commands such as DELU, SIMU and ISOR were used to address such abnormal Ueq value, but failed. After inspection, this does not affect the correct assign of atom types.

PLAT242\_ALERT\_2\_C Low 'MainMol' Ueq as Compared to Neighbors of C21 Check

**Author Response:** These alerts are generated because of a slight unresolved disorder caused by free rotation of the flexible chain at the end of the ligand. Some refi commands such as DELU, SIMU and ISOR were used to address such abnormal Ueq value, but failed. After inspection, this does not affect the correct assign of atom types.

PLAT242\_ALERT\_2\_C Low 'MainMol' Ueq as Compared to Neighbors of C27 Check

**Author Response:** These alerts are generated because of a slight unresolved disorder caused by free rotation of the flexible chain at the end of the ligand. Some refi commands such as DELU, SIMU and ISOR were used to address such abnormal Ueq value, but failed. After inspection, this does not affect the correct assign of atom types.

PLAT242\_ALERT\_2\_C Low 'MainMol' Ueq as Compared to Neighbors of C34 Check

**Author Response:** These alerts are generated because of a slight unresolved disorder caused by free rotation of the flexible chain at the end of the ligand. Some refi commands such as DELU, SIMU and ISOR were used to address such abnormal Ueq value, but failed. After inspection, this does not affect the correct assign of atom types.

|                   |                                                       |                  |         |        |
|-------------------|-------------------------------------------------------|------------------|---------|--------|
| PLAT250_ALERT_2_C | Large U3/U1 Ratio for <U(i,j)> Tensor(Resd            | 2)               | 2.3     | Note   |
| PLAT260_ALERT_2_C | Large Average Ueq of Residue Including                | Pb1              | 0.107   | Check  |
| PLAT260_ALERT_2_C | Large Average Ueq of Residue Including                | N4               | 0.114   | Check  |
| PLAT342_ALERT_3_C | Low Bond Precision on C-C Bonds .....                 |                  | 0.01215 | Ang.   |
| PLAT360_ALERT_2_C | Short C(sp3)-C(sp3) Bond C15 - C17                    |                  | 1.43    | Ang.   |
| PLAT906_ALERT_3_C | Large K Value in the Analysis of Variance .....       |                  | 2.626   | Check  |
| PLAT911_ALERT_3_C | Missing FCF Refl Between Thmin & STh/L=               | 0.588            | 30      | Report |
|                   | -1 3 0, -2 4 1, -4 5 1, 4 6 1, 3 17 1, 0 1 2,         |                  |         |        |
|                   | 1 2 2, 0 3 2, -2 5 2, 3 5 2, 5 7 2, -1 9 2,           |                  |         |        |
|                   | -2 10 2, 3 10 2, -5 11 2, 0 2 3, 6 10 3, -7 12 3,     |                  |         |        |
|                   | 2 5 4, -2 7 4, -2 14 4, -2 4 6, -9 11 6, 0 12 6,      |                  |         |        |
|                   | -4 14 6, 3 11 18, 3 12 18, 3 13 21, 4 13 21, 5 13 21, |                  |         |        |
| PLAT971_ALERT_2_C | Check Calcd Resid. Dens.                              | 1.30Ang From Pb1 | 2.22    | eA-3   |
| PLAT971_ALERT_2_C | Check Calcd Resid. Dens.                              | 1.05Ang From Pb2 | 2.16    | eA-3   |
| PLAT971_ALERT_2_C | Check Calcd Resid. Dens.                              | 1.12Ang From Pb2 | 1.96    | eA-3   |
| PLAT971_ALERT_2_C | Check Calcd Resid. Dens.                              | 0.95Ang From Pb1 | 1.88    | eA-3   |
| PLAT971_ALERT_2_C | Check Calcd Resid. Dens.                              | 1.09Ang From Pb3 | 1.81    | eA-3   |
| PLAT971_ALERT_2_C | Check Calcd Resid. Dens.                              | 0.89Ang From O19 | 1.74    | eA-3   |
| PLAT971_ALERT_2_C | Check Calcd Resid. Dens.                              | 0.24Ang From Pb1 | 1.74    | eA-3   |
| PLAT971_ALERT_2_C | Check Calcd Resid. Dens.                              | 1.11Ang From O2  | 1.73    | eA-3   |
| PLAT971_ALERT_2_C | Check Calcd Resid. Dens.                              | 1.09Ang From Pb3 | 1.68    | eA-3   |
| PLAT971_ALERT_2_C | Check Calcd Resid. Dens.                              | 0.79Ang From Pb2 | 1.53    | eA-3   |
| PLAT973_ALERT_2_C | Check Calcd Positive Resid. Density on                | Pb2              | 1.39    | eA-3   |
| PLAT973_ALERT_2_C | Check Calcd Positive Resid. Density on                | Pb3              | 1.30    | eA-3   |

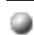

#### Alert level G

ABSMU01\_ALERT\_1\_G Calculation of \_exptl\_absorpt\_correction\_mu

|                                        |                                                  |               |      |      |                |      |            |
|----------------------------------------|--------------------------------------------------|---------------|------|------|----------------|------|------------|
| not performed for this radiation type. |                                                  |               |      |      |                |      |            |
| PLAT002_ALERT_2_G                      | Number of Distance or Angle Restraints on AtSite | 21 Note       |      |      |                |      |            |
| PLAT003_ALERT_2_G                      | Number of Uiso or U(i,j) Restrained non-H Atoms  | 20 Report     |      |      |                |      |            |
| PLAT007_ALERT_5_G                      | Number of Unrefined Donor-H Atoms .....          | 2 Report      |      |      |                |      |            |
| H3                                     | H21                                              |               |      |      |                |      |            |
| PLAT051_ALERT_1_G                      | Mu(calc) and Mu(CIF) Ratio Differs from 1.0 by . | 2.74 %        |      |      |                |      |            |
| PLAT083_ALERT_2_G                      | SHELXL Second Parameter in WGHT Unusually Large  | 28.55 Why ?   |      |      |                |      |            |
| PLAT172_ALERT_4_G                      | The CIF-Embedded .res File Contains DFIX Records | 15 Report     |      |      |                |      |            |
| PLAT177_ALERT_4_G                      | The CIF-Embedded .res File Contains DELU Records | 4 Report      |      |      |                |      |            |
| PLAT178_ALERT_4_G                      | The CIF-Embedded .res File Contains SIMU Records | 4 Report      |      |      |                |      |            |
| PLAT188_ALERT_3_G                      | A Non-default SIMU Restraint Value has been used | 0.0100 Report |      |      |                |      |            |
| PLAT188_ALERT_3_G                      | A Non-default SIMU Restraint Value has been used | 0.0100 Report |      |      |                |      |            |
| PLAT188_ALERT_3_G                      | A Non-default SIMU Restraint Value has been used | 0.0100 Report |      |      |                |      |            |
| PLAT188_ALERT_3_G                      | A Non-default SIMU Restraint Value has been used | 0.0100 Report |      |      |                |      |            |
| PLAT192_ALERT_3_G                      | A Non-default DELU Restraint Value for SecondPar | 0.0200 Report |      |      |                |      |            |
| PLAT192_ALERT_3_G                      | A Non-default DELU Restraint Value for SecondPar | 0.0200 Report |      |      |                |      |            |
| PLAT192_ALERT_3_G                      | A Non-default DELU Restraint Value for SecondPar | 0.0200 Report |      |      |                |      |            |
| PLAT192_ALERT_3_G                      | A Non-default DELU Restraint Value for SecondPar | 0.0200 Report |      |      |                |      |            |
| PLAT299_ALERT_4_G                      | Atom Site Occupancy Constrained at .....         | 0.5 Check     |      |      |                |      |            |
| C53                                    | C54                                              | H53A          | H53B | H53C | H54A           | H54B | H54C       |
| PLAT300_ALERT_4_G                      | Atom Site Occupancy of C7                        |               |      |      | Constrained at |      | 0.75 Check |
| PLAT300_ALERT_4_G                      | Atom Site Occupancy of C43                       |               |      |      | Constrained at |      | 0.75 Check |
| PLAT300_ALERT_4_G                      | Atom Site Occupancy of C6                        |               |      |      | Constrained at |      | 0.25 Check |
| PLAT300_ALERT_4_G                      | Atom Site Occupancy of C42                       |               |      |      | Constrained at |      | 0.25 Check |
| PLAT300_ALERT_4_G                      | Atom Site Occupancy of H5A                       |               |      |      | Constrained at |      | 0.75 Check |
| PLAT300_ALERT_4_G                      | Atom Site Occupancy of H5B                       |               |      |      | Constrained at |      | 0.75 Check |
| PLAT300_ALERT_4_G                      | Atom Site Occupancy of H7A                       |               |      |      | Constrained at |      | 0.75 Check |
| PLAT300_ALERT_4_G                      | Atom Site Occupancy of H7B                       |               |      |      | Constrained at |      | 0.75 Check |
| PLAT300_ALERT_4_G                      | Atom Site Occupancy of H7C                       |               |      |      | Constrained at |      | 0.75 Check |
| PLAT300_ALERT_4_G                      | Atom Site Occupancy of H41A                      |               |      |      | Constrained at |      | 0.75 Check |
| PLAT300_ALERT_4_G                      | Atom Site Occupancy of H41B                      |               |      |      | Constrained at |      | 0.75 Check |
| PLAT300_ALERT_4_G                      | Atom Site Occupancy of H43A                      |               |      |      | Constrained at |      | 0.75 Check |
| PLAT300_ALERT_4_G                      | Atom Site Occupancy of H43B                      |               |      |      | Constrained at |      | 0.75 Check |
| PLAT300_ALERT_4_G                      | Atom Site Occupancy of H43C                      |               |      |      | Constrained at |      | 0.75 Check |
| PLAT300_ALERT_4_G                      | Atom Site Occupancy of H52A                      |               |      |      | Constrained at |      | 0.75 Check |
| PLAT300_ALERT_4_G                      | Atom Site Occupancy of H52B                      |               |      |      | Constrained at |      | 0.75 Check |
| PLAT300_ALERT_4_G                      | Atom Site Occupancy of H6A                       |               |      |      | Constrained at |      | 0.25 Check |
| PLAT300_ALERT_4_G                      | Atom Site Occupancy of H6B                       |               |      |      | Constrained at |      | 0.25 Check |
| PLAT300_ALERT_4_G                      | Atom Site Occupancy of H6C                       |               |      |      | Constrained at |      | 0.25 Check |
| PLAT300_ALERT_4_G                      | Atom Site Occupancy of H42A                      |               |      |      | Constrained at |      | 0.25 Check |
| PLAT300_ALERT_4_G                      | Atom Site Occupancy of H42B                      |               |      |      | Constrained at |      | 0.25 Check |
| PLAT300_ALERT_4_G                      | Atom Site Occupancy of H42C                      |               |      |      | Constrained at |      | 0.25 Check |
| PLAT300_ALERT_4_G                      | Atom Site Occupancy of H52C                      |               |      |      | Constrained at |      | 0.25 Check |
| PLAT300_ALERT_4_G                      | Atom Site Occupancy of H52D                      |               |      |      | Constrained at |      | 0.25 Check |
| PLAT300_ALERT_4_G                      | Atom Site Occupancy of N4                        |               |      |      | Constrained at |      | 0.75 Check |
| PLAT300_ALERT_4_G                      | Atom Site Occupancy of N5                        |               |      |      | Constrained at |      | 0.75 Check |
| PLAT300_ALERT_4_G                      | Atom Site Occupancy of C58                       |               |      |      | Constrained at |      | 0.75 Check |
| PLAT300_ALERT_4_G                      | Atom Site Occupancy of C59                       |               |      |      | Constrained at |      | 0.75 Check |
| PLAT300_ALERT_4_G                      | Atom Site Occupancy of C60                       |               |      |      | Constrained at |      | 0.75 Check |
| PLAT300_ALERT_4_G                      | Atom Site Occupancy of C61                       |               |      |      | Constrained at |      | 0.75 Check |
| PLAT300_ALERT_4_G                      | Atom Site Occupancy of C62                       |               |      |      | Constrained at |      | 0.75 Check |
| PLAT300_ALERT_4_G                      | Atom Site Occupancy of C63                       |               |      |      | Constrained at |      | 0.75 Check |
| PLAT300_ALERT_4_G                      | Atom Site Occupancy of C64                       |               |      |      | Constrained at |      | 0.75 Check |
| PLAT300_ALERT_4_G                      | Atom Site Occupancy of C65                       |               |      |      | Constrained at |      | 0.75 Check |
| PLAT300_ALERT_4_G                      | Atom Site Occupancy of C66                       |               |      |      | Constrained at |      | 0.75 Check |
| PLAT300_ALERT_4_G                      | Atom Site Occupancy of C67                       |               |      |      | Constrained at |      | 0.75 Check |
| PLAT300_ALERT_4_G                      | Atom Site Occupancy of H58                       |               |      |      | Constrained at |      | 0.75 Check |

|                   |                                                  |                   |       |        |
|-------------------|--------------------------------------------------|-------------------|-------|--------|
| PLAT300_ALERT_4_G | Atom Site Occupancy of H59                       | Constrained at    | 0.75  | Check  |
| PLAT300_ALERT_4_G | Atom Site Occupancy of H61                       | Constrained at    | 0.75  | Check  |
| PLAT300_ALERT_4_G | Atom Site Occupancy of H62                       | Constrained at    | 0.75  | Check  |
| PLAT300_ALERT_4_G | Atom Site Occupancy of H63                       | Constrained at    | 0.75  | Check  |
| PLAT300_ALERT_4_G | Atom Site Occupancy of H65                       | Constrained at    | 0.75  | Check  |
| PLAT300_ALERT_4_G | Atom Site Occupancy of H66                       | Constrained at    | 0.75  | Check  |
| PLAT300_ALERT_4_G | Atom Site Occupancy of H67                       | Constrained at    | 0.75  | Check  |
| PLAT301_ALERT_3_G | Main Residue Disorder .....                      | (Resd 1)          | 3%    | Note   |
| PLAT302_ALERT_4_G | Anion/Solvent/Minor-Residue Disorder             | (Resd 2)          | 100%  | Note   |
| PLAT413_ALERT_2_G | Short Inter XH3 .. XHn                           | H53C ..H57C       | 1.73  | Ang.   |
|                   | -1/2+y,1-x,1-z =                                 |                   | 7_566 | Check  |
| PLAT605_ALERT_4_G | Largest Solvent Accessible VOID in the Structure |                   | 72    | A**3   |
| PLAT722_ALERT_1_G | Angle Calc 108.00, Rep 109.50 Dev...             |                   | 1.50  | Degree |
|                   | H42A -C42 -H42B                                  | 1_555 1_555 1_555 | # 581 | Check  |
| PLAT779_ALERT_4_G | Suspect or Irrelevant (Bond) Angle(s) in CIF ... |                   | 0.00  | Deg.   |
|                   | O2 -O2 -PB1 4_565                                | 1_555 1_555 ..... | # 182 | Check  |
| PLAT779_ALERT_4_G | Suspect or Irrelevant (Bond) Angle(s) in CIF ... |                   | 0.00  | Deg.   |
|                   | O2 -O2 -PB1 3_655                                | 1_555 1_555 ..... | # 183 | Check  |
| PLAT779_ALERT_4_G | Suspect or Irrelevant (Bond) Angle(s) in CIF ... |                   | 0.00  | Deg.   |
|                   | O2 -O2 -PB1 2_665                                | 1_555 1_555 ..... | # 184 | Check  |
| PLAT779_ALERT_4_G | Suspect or Irrelevant (Bond) Angle(s) in CIF ... |                   | 0.00  | Deg.   |
|                   | O2 -O2 -AL1 3_655                                | 1_555 4_565 ..... | # 185 | Check  |
| PLAT779_ALERT_4_G | Suspect or Irrelevant (Bond) Angle(s) in CIF ... |                   | 0.00  | Deg.   |
|                   | O2 -O2 -AL1 3_655                                | 1_555 3_655 ..... | # 186 | Check  |
| PLAT779_ALERT_4_G | Suspect or Irrelevant (Bond) Angle(s) in CIF ... |                   | 0.00  | Deg.   |
|                   | O2 -O2 -AL1 4_565                                | 1_555 3_655 ..... | # 187 | Check  |
| PLAT779_ALERT_4_G | Suspect or Irrelevant (Bond) Angle(s) in CIF ... |                   | 0.00  | Deg.   |
|                   | O2 -O2 -AL1 2_665                                | 1_555 3_655 ..... | # 188 | Check  |
| PLAT779_ALERT_4_G | Suspect or Irrelevant (Bond) Angle(s) in CIF ... |                   | 0.00  | Deg.   |
|                   | O2 -O2 -AL1 4_565                                | 1_555 1_555 ..... | # 189 | Check  |
| PLAT779_ALERT_4_G | Suspect or Irrelevant (Bond) Angle(s) in CIF ... |                   | 0.00  | Deg.   |
|                   | O2 -O2 -AL1 2_665                                | 1_555 4_565 ..... | # 190 | Check  |
| PLAT779_ALERT_4_G | Suspect or Irrelevant (Bond) Angle(s) in CIF ... |                   | 0.00  | Deg.   |
|                   | O2 -O2 -AL1 4_565                                | 1_555 2_665 ..... | # 191 | Check  |
| PLAT779_ALERT_4_G | Suspect or Irrelevant (Bond) Angle(s) in CIF ... |                   | 0.00  | Deg.   |
|                   | O2 -O2 -AL1 4_565                                | 1_555 4_565 ..... | # 192 | Check  |
| PLAT779_ALERT_4_G | Suspect or Irrelevant (Bond) Angle(s) in CIF ... |                   | 0.00  | Deg.   |
|                   | O2 -O2 -AL1 3_655                                | 1_555 2_665 ..... | # 193 | Check  |
| PLAT779_ALERT_4_G | Suspect or Irrelevant (Bond) Angle(s) in CIF ... |                   | 0.00  | Deg.   |
|                   | O2 -O2 -AL1 3_655                                | 1_555 1_555 ..... | # 194 | Check  |
| PLAT779_ALERT_4_G | Suspect or Irrelevant (Bond) Angle(s) in CIF ... |                   | 0.00  | Deg.   |
|                   | O2 -O2 -AL1 2_665                                | 1_555 1_555 ..... | # 195 | Check  |
| PLAT779_ALERT_4_G | Suspect or Irrelevant (Bond) Angle(s) in CIF ... |                   | 0.00  | Deg.   |
|                   | O2 -O2 -AL1 2_665                                | 1_555 2_665 ..... | # 196 | Check  |
| PLAT779_ALERT_4_G | Suspect or Irrelevant (Bond) Angle(s) in CIF ... |                   | 0.00  | Deg.   |
|                   | O2 -O2 -O2 3_655                                 | 1_555 2_665 ..... | # 197 | Check  |
| PLAT779_ALERT_4_G | Suspect or Irrelevant (Bond) Angle(s) in CIF ... |                   | 0.00  | Deg.   |
|                   | O2 -O2 -O2 4_565                                 | 1_555 3_655 ..... | # 198 | Check  |
| PLAT779_ALERT_4_G | Suspect or Irrelevant (Bond) Angle(s) in CIF ... |                   | 0.00  | Deg.   |
|                   | O2 -O2 -O2 4_565                                 | 1_555 2_665 ..... | # 199 | Check  |
| PLAT794_ALERT_5_G | Tentative Bond Valency for Pb1                   | (II)              | 2.01  | Info   |
| PLAT794_ALERT_5_G | Tentative Bond Valency for Pb3                   | (II)              | 2.11  | Info   |
| PLAT794_ALERT_5_G | Tentative Bond Valency for Al1                   | (III)             | 2.76  | Info   |
| PLAT794_ALERT_5_G | Tentative Bond Valency for Al2                   | (III)             | 2.75  | Info   |
| PLAT794_ALERT_5_G | Tentative Bond Valency for Al4                   | (III)             | 2.76  | Info   |
| PLAT794_ALERT_5_G | Tentative Bond Valency for Al6                   | (III)             | 2.82  | Info   |
| PLAT794_ALERT_5_G | Tentative Bond Valency for Al7                   | (III)             | 2.81  | Info   |

|                   |                                                  |         |                             |           |       |
|-------------------|--------------------------------------------------|---------|-----------------------------|-----------|-------|
| PLAT794_ALERT_5_G | Tentative Bond Valency for Al8                   | (III)   | .                           | 2.83      | Info  |
| PLAT802_ALERT_4_G | CIF Input Record(s) with more than 80 Characters |         |                             | 2         | Info  |
| PLAT860_ALERT_3_G | Number of Least-Squares Restraints               | .....   |                             | 127       | Note  |
| PLAT868_ALERT_4_G | ALERTS Due to the Use of _smtbx_masks Suppressed |         |                             | !         | Info  |
| PLAT883_ALERT_1_G | No Info/Value for _atom_sites_solution_primary   |         |                             | Please Do | !     |
| PLAT909_ALERT_3_G | Percentage of I>2sig(I) Data at Theta(Max)       | Still   |                             | 57%       | Note  |
| PLAT910_ALERT_3_G | Missing # of FCF Reflection(s) Below Theta(Min). |         |                             | 2         | Note  |
|                   | 1 1 0, 0 0 1,                                    |         |                             |           |       |
| PLAT913_ALERT_3_G | Missing # of Very Strong Reflections in FCF      | ....    |                             | 1         | Note  |
|                   | 1 1 0,                                           |         |                             |           |       |
| PLAT933_ALERT_2_G | Number of HKL-OMIT Records in Embedded .res File |         |                             | 23        | Note  |
|                   | -1 3 0, 0 3 2, 0 1 2, -2 10 2, 1 2 2, 3 5 2,     |         |                             |           |       |
|                   | -2 7 4, -5 11 2, -2 5 2, 0 2 3, -2 4 1, -1 9 2,  |         |                             |           |       |
|                   | 2 5 4, -9 11 6, 3 17 1, -2 4 6, -7 12 3, -4 5 1, |         |                             |           |       |
|                   | 0 12 6, -4 14 6, 5 7 2, 3 10 2, -2 14 4,         |         |                             |           |       |
| PLAT941_ALERT_3_G | Average HKL Measurement Multiplicity             | .....   |                             | 3.4       | Low   |
| PLAT950_ALERT_5_G | Calculated (ThMax) and CIF-Reported Hmax Differ  |         |                             | 3         | Units |
| PLAT969_ALERT_5_G | The 'Henn et al.' R-Factor-gap value             | .....   |                             | 3.449     | Note  |
|                   | Predicted wr2: Based on SigI**2                  | 4.74    | or SHELX Weight             | 15.76     |       |
| PLAT978_ALERT_2_G | Number C-C Bonds with Positive Residual Density. |         |                             | 0         | Info  |
| PLAT984_ALERT_1_G | The C-f' =                                       | 0.0147  | Deviates from the B&C-Value | 0.0137    | Check |
| PLAT984_ALERT_1_G | The N-f' =                                       | 0.0253  | Deviates from the B&C-Value | 0.0241    | Check |
| PLAT984_ALERT_1_G | The O-f' =                                       | 0.0412  | Deviates from the B&C-Value | 0.0389    | Check |
| PLAT984_ALERT_1_G | The Pb-f' =                                      | -4.2646 | Deviates from the B&C-Value | -4.4950   | Check |
| PLAT985_ALERT_1_G | The Al-f" =                                      | 0.1843  | Deviates from the B&C-Value | 0.1873    | Check |
| PLAT985_ALERT_1_G | The Pb-f" =                                      | 7.1982  | Deviates from the B&C-Value | 6.8412    | Check |
| PLAT985_ALERT_1_G | The S-f" =                                       | 0.4242  | Deviates from the B&C-Value | 0.4295    | Check |

---

0 **ALERT level A** = Most likely a serious problem - resolve or explain  
 1 **ALERT level B** = A potentially serious problem, consider carefully  
 38 **ALERT level C** = Check. Ensure it is not caused by an omission or oversight  
 112 **ALERT level G** = General information/check it is not something unexpected

12 ALERT type 1 CIF construction/syntax error, inconsistent or missing data  
 38 ALERT type 2 Indicator that the structure model may be wrong or deficient  
 20 ALERT type 3 Indicator that the structure quality may be low  
 70 ALERT type 4 Improvement, methodology, query or suggestion  
 11 ALERT type 5 Informative message, check

---

## checkCIF publication errors

### Alert level A

PUBL004\_ALERT\_1\_A The contact author's name and address are missing,  
 \_publ\_contact\_author\_name and \_publ\_contact\_author\_address.

PUBL005\_ALERT\_1\_A \_publ\_contact\_author\_email, \_publ\_contact\_author\_fax and  
 \_publ\_contact\_author\_phone are all missing.  
 At least one of these should be present.

PUBL006\_ALERT\_1\_A \_publ\_requested\_journal is missing  
 e.g. 'Acta Crystallographica Section C'

PUBL008\_ALERT\_1\_A \_publ\_section\_title is missing. Title of paper.

PUBL009\_ALERT\_1\_A \_publ\_author\_name is missing. List of author(s) name(s).

PUBL010\_ALERT\_1\_A \_publ\_author\_address is missing. Author(s) address(es).

PUBL012\_ALERT\_1\_A \_publ\_section\_abstract is missing.  
Abstract of paper in English.

---

7 **ALERT level A** = Data missing that is essential or data in wrong format  
0 **ALERT level G** = General alerts. Data that may be required is missing

---

## Publication of your CIF

You should attempt to resolve as many as possible of the alerts in all categories. Often the minor alerts point to easily fixed oversights, errors and omissions in your CIF or refinement strategy, so attention to these fine details can be worthwhile. In order to resolve some of the more serious problems it may be necessary to carry out additional measurements or structure refinements. However, the nature of your study may justify the reported deviations from journal submission requirements and the more serious of these should be commented upon in the discussion or experimental section of a paper or in the "special\_details" fields of the CIF. *checkCIF* was carefully designed to identify outliers and unusual parameters, but every test has its limitations and alerts that are not important in a particular case may appear. Conversely, the absence of alerts does not guarantee there are no aspects of the results needing attention. It is up to the individual to critically assess their own results and, if necessary, seek expert advice.

If level A alerts remain, which you believe to be justified deviations, and you intend to submit this CIF for publication in a journal, you should additionally insert an explanation in your CIF using the Validation Reply Form (VRF) below. This will allow your explanation to be considered as part of the review process.

## Validation response form

Please find below a validation response form (VRF) that can be filled in and pasted into your CIF.

```
# start Validation Reply Form
_vrf_PUBL004_GLOBAL
;
PROBLEM: The contact author's name and address are missing,
RESPONSE: ...
;
_vrf_PUBL005_GLOBAL
;
PROBLEM: _publ_contact_author_email, _publ_contact_author_fax and
RESPONSE: ...
;
_vrf_PUBL006_GLOBAL
;
PROBLEM: _publ_requested_journal is missing
RESPONSE: ...
;
_vrf_PUBL008_GLOBAL
;
PROBLEM: _publ_section_title is missing. Title of paper.
RESPONSE: ...
;
```



```
_vrf_PUBL009_GLOBAL
;
PROBLEM: _publ_author_name is missing. List of author(s) name(s).
RESPONSE: ...
;
_vrf_PUBL010_GLOBAL
;
PROBLEM: _publ_author_address is missing. Author(s) address(es).
RESPONSE: ...
;
_vrf_PUBL012_GLOBAL
;
PROBLEM: _publ_section_abstract is missing.
RESPONSE: ...
;
# end Validation Reply Form
```

If you wish to submit your CIF for publication in Acta Crystallographica Section C or E, you should upload your CIF via the web. If you wish to submit your CIF for publication in IUCrData you should upload your CIF via the web. If your CIF is to form part of a submission to another IUCr journal, you will be asked, either during electronic submission or by the Co-editor handling your paper, to upload your CIF via our web site.

---

**PLATON version of 15/07/2024; check.def file version of 15/07/2024**

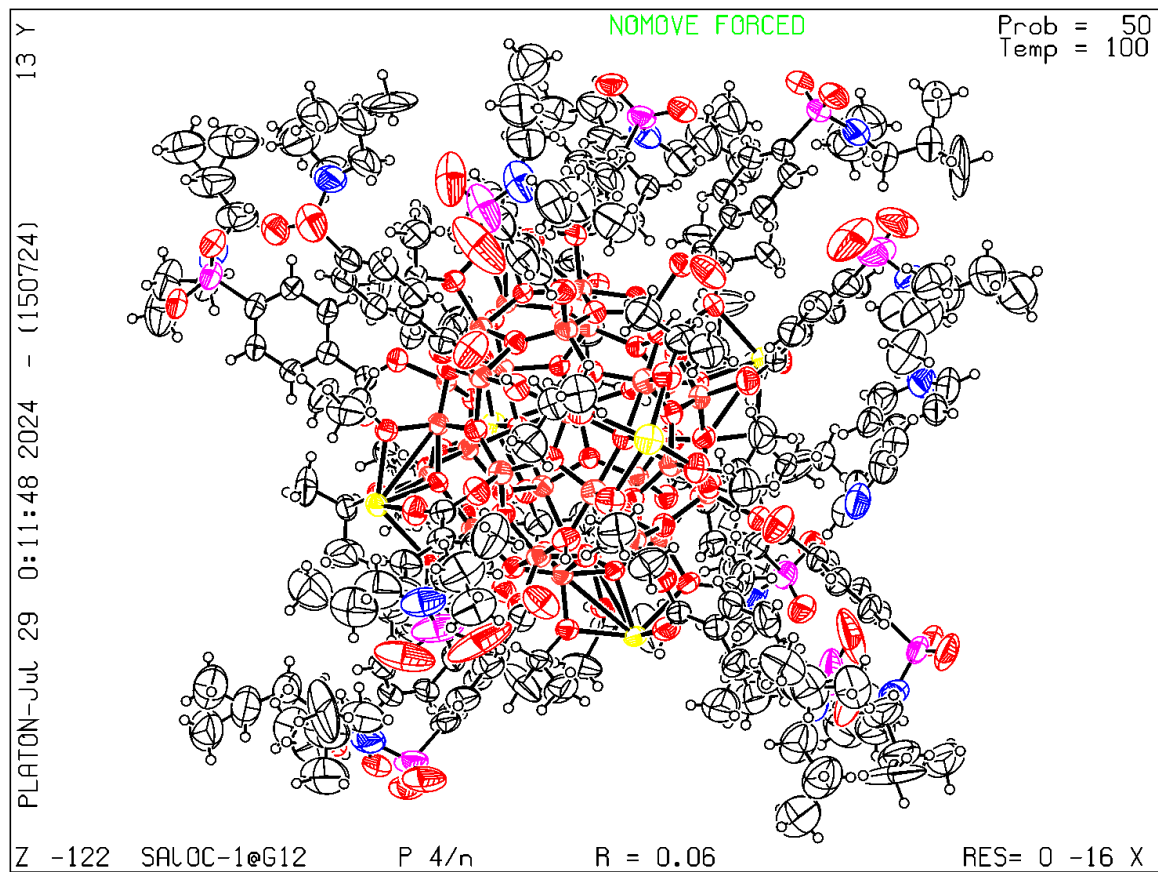

Supplement: Supplementary file 18 [file cf038eb95c7ee815bf913b4e.pdf]
