# Supplementary material for: Precise Nanochemistry of Spherical Aluminum Oxo Clusters for Accurate Surface Guest Recognition and Release
Source: Research Square preprint supplement (doi:10.21203/rs.3.rs-4948547/v1), 2024-11-06

## checkCIF/PLATON report

Structure factors have been supplied for datablock(s) SAIOC-1@G14

THIS REPORT IS FOR GUIDANCE ONLY. IF USED AS PART OF A REVIEW PROCEDURE FOR PUBLICATION, IT SHOULD NOT REPLACE THE EXPERTISE OF AN EXPERIENCED CRYSTALLOGRAPHIC REFEREE.

No syntax errors found.      CIF dictionary      Interpreting this report

### Datablock: SAIOC-1@G14

---

|                        |                                                                       |                                                     |                           |
|------------------------|-----------------------------------------------------------------------|-----------------------------------------------------|---------------------------|
| Bond precision:        | C-C = 0.0146 Å                                                        | Wavelength=1.34050                                  |                           |
| Cell:                  | a=30.0170 (3)<br>alpha=90                                             | b=30.0170 (3)<br>beta=90                            | c=19.5023 (4)<br>gamma=90 |
| Temperature:           | 100 K                                                                 |                                                     |                           |
|                        | Calculated                                                            | Reported                                            |                           |
| Volume                 | 17572.0 (5)                                                           | 17572.0 (5)                                         |                           |
| Space group            | P 4/n                                                                 | P 4/n                                               |                           |
| Hall group             | -P 4a                                                                 | -P 4a                                               |                           |
| Moiety formula         | C216 H364 Al32 N12 O110 Pb6<br>S12, 2(C8 H10 N), 2(C5 H4<br>N) [+ sol | C216 H364 Al32 N12 O110 Pb6<br>S12, 0.5(C52 H56 N8) |                           |
| Sum formula            | C242 H392 Al32 N16 O110 Pb6<br>S12 [+ solvent]                        | C242 H392 Al32 N16 O110 Pb6<br>S12                  |                           |
| Mr                     | 7777.02                                                               | 7776.91                                             |                           |
| Dx, g cm <sup>-3</sup> | 1.470                                                                 | 1.470                                               |                           |
| Z                      | 2                                                                     | 2                                                   |                           |
| Mu (mm <sup>-1</sup> ) | 5.059                                                                 | 5.201                                               |                           |
| F000                   | 7872.0                                                                | 7872.0                                              |                           |
| F000'                  | 7851.44                                                               |                                                     |                           |
| h, k, lmax             | 38, 38, 25                                                            | 38, 31, 25                                          |                           |
| Nref                   | 19898                                                                 | 19373                                               |                           |
| Tmin, Tmax             | 0.563, 0.771                                                          | 0.248, 1.000                                        |                           |
| Tmin'                  | 0.337                                                                 |                                                     |                           |

Correction method= # Reported T Limits: Tmin=0.248 Tmax=1.000  
AbsCorr = MULTI-SCAN

Data completeness= 0.974

Theta(max)= 60.036

R(reflections)= 0.0701( 13018)

wR2(reflections)=  
0.2239( 19373)

S = 1.047

Npar= 977

---

The following ALERTS were generated. Each ALERT has the format  
**test-name\_ALERT\_alert-type\_alert-level**.  
Click on the hyperlinks for more details of the test.

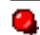

#### Alert level A

PLAT973\_ALERT\_2\_A Check Calcd Positive Resid. Density on Pb1 2.32 eA-3

**Author Response:** These alerts are generated because of residual density peaks near the heaviest atoms in the structure, due to fourier termination ripples. After inspection, the residual electron density peak does not make chemical sense and will not affect the correct identification of the structure.

PLAT973\_ALERT\_2\_A Check Calcd Positive Resid. Density on Pb2 2.07 eA-3

**Author Response:** These alerts are generated because of residual density peaks near the heaviest atoms in the structure, due to fourier termination ripples. After inspection, the residual electron density peak does not make chemical sense and will not affect the correct identification of the structure.

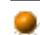

#### Alert level B

PLAT242\_ALERT\_2\_B Low 'MainMol' Ueq as Compared to Neighbors of N3 Check

**Author Response:** These alerts are generated because there is a large amount of disorder in the structure. Some refined commands such as DELU, SIMU and ISOR were used to address such abnormal Ueq value, but failed. After inspection, this does not affect the correct assignment of atom types.

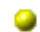

#### Alert level C

RADNW01\_ALERT\_1\_C The radiation wavelength lies outside the expected range  
for the supplied radiation type. Expected range 1.34130-1.34150  
Wavelength given = 1.34050

|                   |                                                  |      |        |
|-------------------|--------------------------------------------------|------|--------|
| PLAT094_ALERT_2_C | Ratio of Maximum / Minimum Residual Density .... | 3.17 | Report |
| PLAT220_ALERT_2_C | NonSolvent Resd 1 C Ueq(max)/Ueq(min) Range      | 3.9  | Ratio  |
| PLAT220_ALERT_2_C | NonSolvent Resd 1 O Ueq(max)/Ueq(min) Range      | 5.4  | Ratio  |
| PLAT222_ALERT_3_C | NonSolvent Resd 1 H Uiso(max)/Uiso(min) Range    | 5.6  | Ratio  |
| PLAT241_ALERT_2_C | High 'MainMol' Ueq as Compared to Neighbors of   | 024  | Check  |
| PLAT241_ALERT_2_C | High 'MainMol' Ueq as Compared to Neighbors of   | C19  | Check  |
| PLAT241_ALERT_2_C | High 'MainMol' Ueq as Compared to Neighbors of   | C25  | Check  |
| PLAT241_ALERT_2_C | High 'MainMol' Ueq as Compared to Neighbors of   | C38  | Check  |
| PLAT241_ALERT_2_C | High 'MainMol' Ueq as Compared to Neighbors of   | C39  | Check  |

|                   |      |           |                                 |     |       |
|-------------------|------|-----------|---------------------------------|-----|-------|
| PLAT241_ALERT_2_C | High | 'MainMol' | Ueq as Compared to Neighbors of | C48 | Check |
| PLAT241_ALERT_2_C | High | 'MainMol' | Ueq as Compared to Neighbors of | C57 | Check |
| PLAT241_ALERT_2_C | High | 'MainMol' | Ueq as Compared to Neighbors of | C59 | Check |
| PLAT241_ALERT_2_C | High | 'MainMol' | Ueq as Compared to Neighbors of | C62 | Check |
| PLAT242_ALERT_2_C | Low  | 'MainMol' | Ueq as Compared to Neighbors of | N2  | Check |

**Author Response:** These alerts are generated because there is a large amount of disorder in the structure. Some refined commands such as DELU, SIMU and ISOR were used to address such abnormal Ueq value, but failed. After inspection, this does not affect the correct assignment of atom types.

|                   |     |           |                                 |     |       |
|-------------------|-----|-----------|---------------------------------|-----|-------|
| PLAT242_ALERT_2_C | Low | 'MainMol' | Ueq as Compared to Neighbors of | C31 | Check |
|-------------------|-----|-----------|---------------------------------|-----|-------|

**Author Response:** These alerts are generated because there is a large amount of disorder in the structure. Some refined commands such as DELU, SIMU and ISOR were used to address such abnormal Ueq value, but failed. After inspection, this does not affect the correct assignment of atom types.

|                   |     |           |                                 |     |       |
|-------------------|-----|-----------|---------------------------------|-----|-------|
| PLAT242_ALERT_2_C | Low | 'MainMol' | Ueq as Compared to Neighbors of | C34 | Check |
|-------------------|-----|-----------|---------------------------------|-----|-------|

**Author Response:** These alerts are generated because there is a large amount of disorder in the structure. Some refined commands such as DELU, SIMU and ISOR were used to address such abnormal Ueq value, but failed. After inspection, this does not affect the correct assignment of atom types.

|                   |     |           |                                 |     |       |
|-------------------|-----|-----------|---------------------------------|-----|-------|
| PLAT242_ALERT_2_C | Low | 'MainMol' | Ueq as Compared to Neighbors of | C43 | Check |
|-------------------|-----|-----------|---------------------------------|-----|-------|

**Author Response:** These alerts are generated because there is a large amount of disorder in the structure. Some refined commands such as DELU, SIMU and ISOR were used to address such abnormal Ueq value, but failed. After inspection, this does not affect the correct assignment of atom types.

|                   |     |           |                                 |     |       |
|-------------------|-----|-----------|---------------------------------|-----|-------|
| PLAT242_ALERT_2_C | Low | 'MainMol' | Ueq as Compared to Neighbors of | C49 | Check |
|-------------------|-----|-----------|---------------------------------|-----|-------|

**Author Response:** These alerts are generated because there is a large amount of disorder in the structure. Some refined commands such as DELU, SIMU and ISOR were used to address such abnormal Ueq value, but failed. After inspection, this does not affect the correct assignment of atom types.

|                   |     |           |                                 |     |       |
|-------------------|-----|-----------|---------------------------------|-----|-------|
| PLAT242_ALERT_2_C | Low | 'MainMol' | Ueq as Compared to Neighbors of | C51 | Check |
|-------------------|-----|-----------|---------------------------------|-----|-------|

**Author Response:** These alerts are generated because there is a large amount of disorder in the structure. Some refined commands such as DELU, SIMU and ISOR were used to address such abnormal Ueq value, but failed. After inspection, this does not affect the correct assignment of atom types.

PLAT242\_ALERT\_2\_C Low 'MainMol' Ueq as Compared to Neighbors of C56 Check

**Author Response:** These alerts are generated because there is a large amount of disorder in the structure. Some refined commands such as DELU, SIMU and ISOR were used to address such abnormal Ueq value, but failed. After inspection, this does not affect the correct assignment of atom types.

PLAT242\_ALERT\_2\_C Low 'MainMol' Ueq as Compared to Neighbors of C66 Check

**Author Response:** These alerts are generated because there is a large amount of disorder in the structure. Some refined commands such as DELU, SIMU and ISOR were used to address such abnormal Ueq value, but failed. After inspection, this does not affect the correct assignment of atom types.

PLAT260\_ALERT\_2\_C Large Average Ueq of Residue Including Pb1 0.125 Check  
PLAT260\_ALERT\_2\_C Large Average Ueq of Residue Including N5 0.150 Check  
PLAT260\_ALERT\_2\_C Large Average Ueq of Residue Including N4 0.150 Check  
PLAT329\_ALERT\_4\_C Carbon Atom Hybridisation Unclear for ..... C6 Check  
PLAT342\_ALERT\_3\_C Low Bond Precision on C-C Bonds ..... 0.0146 Ang.  
PLAT411\_ALERT\_2\_C Short Inter H...H Contact H18B ..H63A . 2.10 Ang.  
1-x,2-y,1-z = 5\_676 Check  
PLAT906\_ALERT\_3\_C Large K Value in the Analysis of Variance ..... 2.918 Check  
PLAT911\_ALERT\_3\_C Missing FCF Refl Between Thmin & STh/L= 0.600 73 Report  
1 3 0, 0 4 0, -3 5 0, 1 5 0, 0 6 0, 2 6 0,  
8 8 0, 5 9 0, 6 10 0, -21 29 0, -19 29 0, -17 29 0,  
1 1 1, -2 3 1, -1 3 1, -2 4 1, -4 5 1, -2 5 1,  
0 5 1, -3 7 1, 2 9 1, -8 10 1, 3 10 1, 2 11 1,  
-21 29 1, -20 29 1, 0 0 2, 0 3 2, 1 3 2, -2 4 2,  
3 4 2, 4 5 2, 6 6 2, -4 7 2, 1 9 2, -9 10 2,  
5 10 2, -6 12 2, 0 12 2, 0 2 3, 1 3 3, 1 5 3,  
2 6 3, -1 7 3, 7 12 3, -3 4 4, -2 5 4, 2 5 4,  
-1 6 4, 2 6 4, -2 12 4, 2 14 4, -1 4 5, 3 4 5,  
-3 6 5, 5 9 5, -5 8 6, 1 8 6, 1 9 6, -4 16 6,  
0 0 7, 3 3 7, 3 7 7, 0 8 7, 5 13 7, 4 4 9,  
-1 12 9, 0 0 14, 15 21 14, 15 22 14, 14 24 14, 14 25 14,  
1 17 18,  
PLAT971\_ALERT\_2\_C Check Calcd Resid. Dens. 0.73Ang From Pb2 2.19 eA-3  
PLAT971\_ALERT\_2\_C Check Calcd Resid. Dens. 0.59Ang From Pb1 1.97 eA-3  
PLAT971\_ALERT\_2\_C Check Calcd Resid. Dens. 1.01Ang From Pb2 1.56 eA-3  
PLAT975\_ALERT\_2\_C Check Calcd Resid. Dens. 1.03Ang From O5 . 0.70 eA-3  
PLAT977\_ALERT\_2\_C Check Negative Difference Density on H17C . -0.31 eA-3

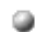

### Alert level G

ABSMU01\_ALERT\_1\_G Calculation of \_exptl\_absorpt\_correction\_mu  
not performed for this radiation type.

PLAT002\_ALERT\_2\_G Number of Distance or Angle Restraints on AtSite 28 Note  
PLAT003\_ALERT\_2\_G Number of Uiso or U(i,j) Restrained non-H Atoms 45 Report  
PLAT007\_ALERT\_5\_G Number of Unrefined Donor-H Atoms ..... 2 Report  
H12 H27

PLAT042\_ALERT\_1\_G Calc. and Reported MoietyFormula Strings Differ Please Check  
Calc: C216 H364 Al32 N12 O110 Pb6 S12, 2(C8 H10 N), 2(C5 H4 N)  
Rep.: C216 H364 Al32 N12 O110 Pb6 S12, 0.5(C52 H56 N)

8)

|                   |                                                  |               |
|-------------------|--------------------------------------------------|---------------|
| PLAT051_ALERT_1_G | Mu(calc) and Mu(CIF) Ratio Differs from 1.0 by . | 2.73 %        |
| PLAT072_ALERT_2_G | SHELXL First Parameter in WGHT Unusually Large   | 0.14 Report   |
| PLAT172_ALERT_4_G | The CIF-Embedded .res File Contains DFIX Records | 23 Report     |
| PLAT177_ALERT_4_G | The CIF-Embedded .res File Contains DELU Records | 5 Report      |
| PLAT178_ALERT_4_G | The CIF-Embedded .res File Contains SIMU Records | 5 Report      |
| PLAT186_ALERT_4_G | The CIF-Embedded .res File Contains ISOR Records | 4 Report      |
| PLAT188_ALERT_3_G | A Non-default SIMU Restraint Value has been used | 0.0100 Report |
| PLAT188_ALERT_3_G | A Non-default SIMU Restraint Value has been used | 0.0100 Report |
| PLAT188_ALERT_3_G | A Non-default SIMU Restraint Value has been used | 0.0100 Report |
| PLAT188_ALERT_3_G | A Non-default SIMU Restraint Value has been used | 0.0100 Report |
| PLAT188_ALERT_3_G | A Non-default SIMU Restraint Value has been used | 0.0100 Report |
| PLAT192_ALERT_3_G | A Non-default DELU Restraint Value for SecondPar | 0.0200 Report |
| PLAT192_ALERT_3_G | A Non-default DELU Restraint Value for SecondPar | 0.0200 Report |
| PLAT192_ALERT_3_G | A Non-default DELU Restraint Value for SecondPar | 0.0200 Report |
| PLAT192_ALERT_3_G | A Non-default DELU Restraint Value for SecondPar | 0.0200 Report |
| PLAT192_ALERT_3_G | A Non-default DELU Restraint Value for SecondPar | 0.0200 Report |
| PLAT299_ALERT_4_G | Atom Site Occupancy Constrained at .....         | 0.5 Check     |
|                   | C41 C42 H40A H40B H40C H40D H41A H41B            |               |
|                   | H41C H42A H42B H42C N5 C6 C7 C8                  |               |
|                   | C9 C10 C11 C12 C13 H6A H6B H7A                   |               |
|                   | H7B H8A H8B H9 H10 H12A H13 N4                   |               |
|                   | C1 C2 C3 C4 C5 H1 H2 H4                          |               |
|                   | H5                                               |               |
| PLAT301_ALERT_3_G | Main Residue Disorder .....(Resd 1)              | 1% Note       |
| PLAT302_ALERT_4_G | Anion/Solvent/Minor-Residue Disorder (Resd 2)    | 100% Note     |
| PLAT302_ALERT_4_G | Anion/Solvent/Minor-Residue Disorder (Resd 3)    | 100% Note     |
| PLAT304_ALERT_4_G | Non-Integer Number of Atoms in ..... (Resd 2)    | 9.50 Check    |
| PLAT411_ALERT_2_G | Short Inter H...H Contact H7B ..H62A .           | 2.08 Ang.     |
|                   | 1-x,2-y,1-z =                                    | 5_676 Check   |
| PLAT411_ALERT_2_G | Short Inter H...H Contact H1 ..H57 .             | 2.11 Ang.     |
|                   | x,y,z =                                          | 1_555 Check   |
| PLAT411_ALERT_2_G | Short Inter H...H Contact H1 ..H47 .             | 2.14 Ang.     |
|                   | y,3/2-x,z =                                      | 4_565 Check   |
| PLAT412_ALERT_2_G | Short Intra XH3 .. XHn H37B ..H41A .             | 1.99 Ang.     |
|                   | x,y,z =                                          | 1_555 Check   |
| PLAT412_ALERT_2_G | Short Intra XH3 .. XHn H39B ..H42B .             | 2.12 Ang.     |
|                   | x,y,z =                                          | 1_555 Check   |
| PLAT413_ALERT_2_G | Short Inter XH3 .. XHn H42C ..H61B .             | 2.10 Ang.     |
|                   | -1+y,3/2-x,z =                                   | 4_465 Check   |
| PLAT432_ALERT_2_G | Short Inter X...Y Contact C2 ..C6 .              | 2.53 Ang.     |
|                   | 2-y,1/2+x,1-z =                                  | 8_766 Check   |
| PLAT432_ALERT_2_G | Short Inter X...Y Contact C3 ..C6 .              | 1.48 Ang.     |
|                   | 2-y,1/2+x,1-z =                                  | 8_766 Check   |
| PLAT432_ALERT_2_G | Short Inter X...Y Contact C3 ..C7 .              | 2.69 Ang.     |
|                   | 2-y,1/2+x,1-z =                                  | 8_766 Check   |
| PLAT432_ALERT_2_G | Short Inter X...Y Contact C3 ..C8 .              | 3.10 Ang.     |
|                   | 2-y,1/2+x,1-z =                                  | 8_766 Check   |
| PLAT432_ALERT_2_G | Short Inter X...Y Contact C4 ..C6 .              | 2.42 Ang.     |
|                   | 2-y,1/2+x,1-z =                                  | 8_766 Check   |
| PLAT605_ALERT_4_G | Largest Solvent Accessible VOID in the Structure | 109 A**3      |
| PLAT779_ALERT_4_G | Suspect or Irrelevant (Bond) Angle(s) in CIF ... | 0.00 Deg.     |
|                   | O10 -O10 -PB1 3_655 1_555 1_555 ..... #          | 185 Check     |
| PLAT779_ALERT_4_G | Suspect or Irrelevant (Bond) Angle(s) in CIF ... | 0.00 Deg.     |
|                   | O10 -O10 -PB1 4_565 1_555 1_555 ..... #          | 186 Check     |
| PLAT779_ALERT_4_G | Suspect or Irrelevant (Bond) Angle(s) in CIF ... | 0.00 Deg.     |
|                   | O10 -O10 -PB1 2_665 1_555 1_555 ..... #          | 187 Check     |

|                   |                                                  |                            |             |
|-------------------|--------------------------------------------------|----------------------------|-------------|
| PLAT779_ALERT_4_G | Suspect or Irrelevant                            | (Bond) Angle(s) in CIF ... | 0.00 Deg.   |
| O10 -O10 -AL2     | 2_665                                            | 1_555 4_565 .....          | # 188 Check |
| PLAT779_ALERT_4_G | Suspect or Irrelevant                            | (Bond) Angle(s) in CIF ... | 0.00 Deg.   |
| O10 -O10 -AL2     | 2_665                                            | 1_555 2_665 .....          | # 189 Check |
| PLAT779_ALERT_4_G | Suspect or Irrelevant                            | (Bond) Angle(s) in CIF ... | 0.00 Deg.   |
| O10 -O10 -AL2     | 3_655                                            | 1_555 2_665 .....          | # 190 Check |
| PLAT779_ALERT_4_G | Suspect or Irrelevant                            | (Bond) Angle(s) in CIF ... | 0.00 Deg.   |
| O10 -O10 -AL2     | 4_565                                            | 1_555 1_555 .....          | # 191 Check |
| PLAT779_ALERT_4_G | Suspect or Irrelevant                            | (Bond) Angle(s) in CIF ... | 0.00 Deg.   |
| O10 -O10 -AL2     | 4_565                                            | 1_555 3_655 .....          | # 192 Check |
| PLAT779_ALERT_4_G | Suspect or Irrelevant                            | (Bond) Angle(s) in CIF ... | 0.00 Deg.   |
| O10 -O10 -AL2     | 3_655                                            | 1_555 4_565 .....          | # 193 Check |
| PLAT779_ALERT_4_G | Suspect or Irrelevant                            | (Bond) Angle(s) in CIF ... | 0.00 Deg.   |
| O10 -O10 -AL2     | 3_655                                            | 1_555 1_555 .....          | # 194 Check |
| PLAT779_ALERT_4_G | Suspect or Irrelevant                            | (Bond) Angle(s) in CIF ... | 0.00 Deg.   |
| O10 -O10 -AL2     | 2_665                                            | 1_555 3_655 .....          | # 195 Check |
| PLAT779_ALERT_4_G | Suspect or Irrelevant                            | (Bond) Angle(s) in CIF ... | 0.00 Deg.   |
| O10 -O10 -AL2     | 2_665                                            | 1_555 1_555 .....          | # 196 Check |
| PLAT779_ALERT_4_G | Suspect or Irrelevant                            | (Bond) Angle(s) in CIF ... | 0.00 Deg.   |
| O10 -O10 -AL2     | 4_565                                            | 1_555 2_665 .....          | # 197 Check |
| PLAT779_ALERT_4_G | Suspect or Irrelevant                            | (Bond) Angle(s) in CIF ... | 0.00 Deg.   |
| O10 -O10 -AL2     | 4_565                                            | 1_555 4_565 .....          | # 198 Check |
| PLAT779_ALERT_4_G | Suspect or Irrelevant                            | (Bond) Angle(s) in CIF ... | 0.00 Deg.   |
| O10 -O10 -AL2     | 3_655                                            | 1_555 3_655 .....          | # 199 Check |
| PLAT779_ALERT_4_G | Suspect or Irrelevant                            | (Bond) Angle(s) in CIF ... | 0.00 Deg.   |
| O10 -O10 -O10     | 4_565                                            | 1_555 3_655 .....          | # 200 Check |
| PLAT779_ALERT_4_G | Suspect or Irrelevant                            | (Bond) Angle(s) in CIF ... | 0.00 Deg.   |
| O10 -O10 -O10     | 3_655                                            | 1_555 2_665 .....          | # 201 Check |
| PLAT779_ALERT_4_G | Suspect or Irrelevant                            | (Bond) Angle(s) in CIF ... | 0.00 Deg.   |
| O10 -O10 -O10     | 4_565                                            | 1_555 2_665 .....          | # 202 Check |
| PLAT794_ALERT_5_G | Tentative Bond Valency for Pb1                   | (II) .                     | 1.97 Info   |
| PLAT794_ALERT_5_G | Tentative Bond Valency for Pb3                   | (II) .                     | 2.10 Info   |
| PLAT794_ALERT_5_G | Tentative Bond Valency for Al2                   | (III) .                    | 2.76 Info   |
| PLAT794_ALERT_5_G | Tentative Bond Valency for Al3                   | (III) .                    | 2.76 Info   |
| PLAT794_ALERT_5_G | Tentative Bond Valency for Al4                   | (III) .                    | 2.80 Info   |
| PLAT794_ALERT_5_G | Tentative Bond Valency for Al5                   | (III) .                    | 2.78 Info   |
| PLAT794_ALERT_5_G | Tentative Bond Valency for Al6                   | (III) .                    | 2.75 Info   |
| PLAT794_ALERT_5_G | Tentative Bond Valency for Al7                   | (III) .                    | 2.79 Info   |
| PLAT794_ALERT_5_G | Tentative Bond Valency for Al8                   | (III) .                    | 2.84 Info   |
| PLAT860_ALERT_3_G | Number of Least-Squares Restraints               | .....                      | 436 Note    |
| PLAT868_ALERT_4_G | ALERTS Due to the Use of _smtbx_masks            | Suppressed                 | ! Info      |
| PLAT883_ALERT_1_G | No Info/Value for _atom_sites_solution_primary   | .                          | Please Do ! |
| PLAT910_ALERT_3_G | Missing # of FCF Reflection(s) Below Theta(Min). |                            | 2 Note      |
|                   | 1 1 0, 0 0 1,                                    |                            |             |
| PLAT912_ALERT_4_G | Missing # of FCF Reflections Above STh/L=        | 0.600                      | 446 Note    |
| PLAT913_ALERT_3_G | Missing # of Very Strong Reflections in FCF .... |                            | 1 Note      |
|                   | 1 1 0,                                           |                            |             |
| PLAT933_ALERT_2_G | Number of HKL-OMIT Records in Embedded .res File |                            | 65 Note     |
|                   | -23 26 9, 18 19 17, 0 2 3, 0 4 0, 1 1 1,         | 2 6 3,                     |             |
|                   | 1 8 6, -1 3 1, 1 3 2, 0 5 1, -2 12 4,            | 4 4 9,                     |             |
|                   | -9 25 18, -3 7 1, 0 12 2, 5 9 5, 7 12 3,         | 2 5 4,                     |             |
|                   | -3 4 4, 2 14 4, 1 9 2, -2 4 2, 2 11 1,           | -4 7 2,                    |             |
|                   | 3 3 7, 15 25 14, 3 4 2, -1 4 5, 3 7 7,           | 0 3 2,                     |             |
|                   | -4 5 1, 1 5 3, -5 26 18, 2 9 1, 5 13 7,          | -2 5 1,                    |             |
|                   | 2 6 0, -9 10 2, -1 6 4, -2 5 4, 1 3 3,           | -3 5 0,                    |             |
|                   | -6 12 2, 1 9 6, 4 5 2, -3 6 5, 6 6 2,            | -5 8 6,                    |             |
|                   | 0 8 7, -8 10 1,                                  |                            |             |

|                   |                                                      |         |       |
|-------------------|------------------------------------------------------|---------|-------|
| PLAT941_ALERT_3_G | Average HKL Measurement Multiplicity .....           | 3.0     | Low   |
| PLAT951_ALERT_5_G | Calculated (ThMax) and CIF-Reported Kmax Differ      | 7       | Units |
| PLAT969_ALERT_5_G | The 'Henn et al.' R-Factor-gap value .....           | 3.728   | Note  |
|                   | Predicted wR2: Based on SigI**2 6.01 or SHELX Weight | 21.38   |       |
| PLAT978_ALERT_2_G | Number C-C Bonds with Positive Residual Density.     | 1       | Info  |
| PLAT984_ALERT_1_G | The C-f' = 0.0147 Deviates from the B&C-Value        | 0.0137  | Check |
| PLAT984_ALERT_1_G | The N-f' = 0.0253 Deviates from the B&C-Value        | 0.0241  | Check |
| PLAT984_ALERT_1_G | The O-f' = 0.0412 Deviates from the B&C-Value        | 0.0389  | Check |
| PLAT984_ALERT_1_G | The Pb-f' = -4.2646 Deviates from the B&C-Value      | -4.4950 | Check |
| PLAT985_ALERT_1_G | The Al-f" = 0.1843 Deviates from the B&C-Value       | 0.1873  | Check |
| PLAT985_ALERT_1_G | The Pb-f" = 7.1982 Deviates from the B&C-Value       | 6.8412  | Check |
| PLAT985_ALERT_1_G | The S-f" = 0.4242 Deviates from the B&C-Value        | 0.4295  | Check |

- 
- 2 **ALERT level A** = Most likely a serious problem - resolve or explain  
1 **ALERT level B** = A potentially serious problem, consider carefully  
35 **ALERT level C** = Check. Ensure it is not caused by an omission or oversight  
83 **ALERT level G** = General information/check it is not something unexpected
- 12 ALERT type 1 CIF construction/syntax error, inconsistent or missing data  
48 ALERT type 2 Indicator that the structure model may be wrong or deficient  
19 ALERT type 3 Indicator that the structure quality may be low  
30 ALERT type 4 Improvement, methodology, query or suggestion  
12 ALERT type 5 Informative message, check
- 

## checkCIF publication errors

---

### Alert level A

PUBL004\_ALERT\_1\_A The contact author's name and address are missing,  
    \_publ\_contact\_author\_name and \_publ\_contact\_author\_address.  
PUBL005\_ALERT\_1\_A \_publ\_contact\_author\_email, \_publ\_contact\_author\_fax and  
    \_publ\_contact\_author\_phone are all missing.  
    At least one of these should be present.  
PUBL006\_ALERT\_1\_A \_publ\_requested\_journal is missing  
    e.g. 'Acta Crystallographica Section C'  
PUBL008\_ALERT\_1\_A \_publ\_section\_title is missing. Title of paper.  
PUBL009\_ALERT\_1\_A \_publ\_author\_name is missing. List of author(s) name(s).  
PUBL010\_ALERT\_1\_A \_publ\_author\_address is missing. Author(s) address(es).  
PUBL012\_ALERT\_1\_A \_publ\_section\_abstract is missing.  
    Abstract of paper in English.

- 
- 7 **ALERT level A** = Data missing that is essential or data in wrong format  
0 **ALERT level G** = General alerts. Data that may be required is missing
-

## Publication of your CIF

You should attempt to resolve as many as possible of the alerts in all categories. Often the minor alerts point to easily fixed oversights, errors and omissions in your CIF or refinement strategy, so attention to these fine details can be worthwhile. In order to resolve some of the more serious problems it may be necessary to carry out additional measurements or structure refinements. However, the nature of your study may justify the reported deviations from journal submission requirements and the more serious of these should be commented upon in the discussion or experimental section of a paper or in the "special\_details" fields of the CIF. *checkCIF* was carefully designed to identify outliers and unusual parameters, but every test has its limitations and alerts that are not important in a particular case may appear. Conversely, the absence of alerts does not guarantee there are no aspects of the results needing attention. It is up to the individual to critically assess their own results and, if necessary, seek expert advice.

If level A alerts remain, which you believe to be justified deviations, and you intend to submit this CIF for publication in a journal, you should additionally insert an explanation in your CIF using the Validation Reply Form (VRF) below. This will allow your explanation to be considered as part of the review process.

## Validation response form

Please find below a validation response form (VRF) that can be filled in and pasted into your CIF.

```
# start Validation Reply Form
_vrf_PUBL004_GLOBAL
;
PROBLEM: The contact author's name and address are missing,
RESPONSE: ...
;
_vrf_PUBL005_GLOBAL
;
PROBLEM: _publ_contact_author_email, _publ_contact_author_fax and
RESPONSE: ...
;
_vrf_PUBL006_GLOBAL
;
PROBLEM: _publ_requested_journal is missing
RESPONSE: ...
;
_vrf_PUBL008_GLOBAL
;
PROBLEM: _publ_section_title is missing. Title of paper.
RESPONSE: ...
;
_vrf_PUBL009_GLOBAL
;
PROBLEM: _publ_author_name is missing. List of author(s) name(s).
RESPONSE: ...
;
_vrf_PUBL010_GLOBAL
;
PROBLEM: _publ_author_address is missing. Author(s) address(es).
```

```

RESPONSE: ...
;
_vrf_PUBL012_GLOBAL
;
PROBLEM: _publ_section_abstract is missing.
RESPONSE: ...
;
# end Validation Reply Form

```

If you wish to submit your CIF for publication in Acta Crystallographica Section C or E, you should upload your CIF via the web. If you wish to submit your CIF for publication in IUCrData you should upload your CIF via the web. If your CIF is to form part of a submission to another IUCr journal, you will be asked, either during electronic submission or by the Co-editor handling your paper, to upload your CIF via our web site.

---

**PLATON version of 15/07/2024; check.def file version of 15/07/2024**

Datablock SAIOC-1@G14 - ellipsoid plot

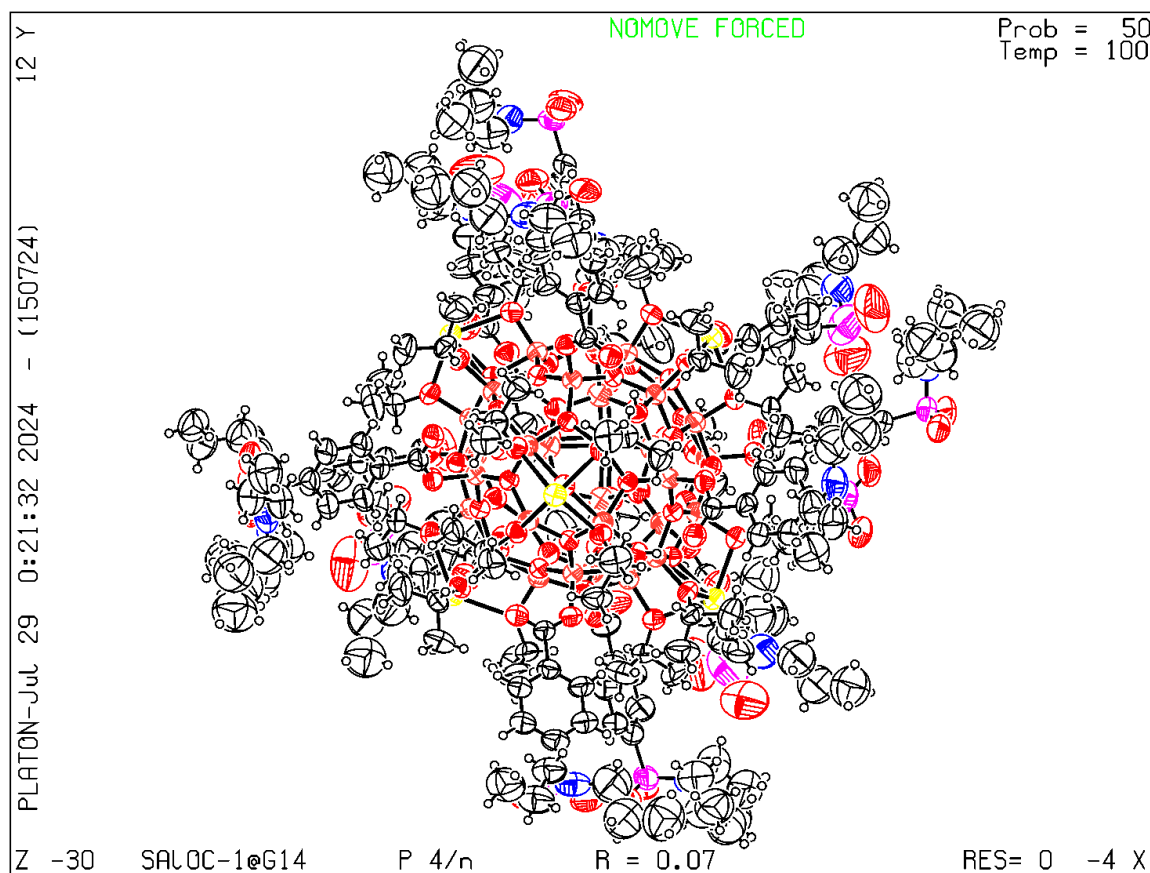

Supplement: Supplementary file 19 [file dc5fe40d896bc9334fbf54af.pdf]
