# Supplementary material for: Precise Nanochemistry of Spherical Aluminum Oxo Clusters for Accurate Surface Guest Recognition and Release
Source: Research Square preprint supplement (doi:10.21203/rs.3.rs-4948547/v1), 2024-11-06
Supplement: Supplementary file 17 [file c3d493c8a2389e99cc6b8cc4.pdf]

## Supporting Information

# Precise Nanochemistry of Spherical Aluminum Oxo Clusters for Accurate Surface Guest Recognition and Release

Si-Hao Shen,<sup>1,2</sup> Ying-Hua Yu,<sup>1,2</sup> Jian-Bing Chen,<sup>1,3</sup> Wei-Hui Fang<sup>\*1</sup> and Jian Zhang<sup>\*1</sup>

<sup>1</sup>State Key Laboratory of Structural Chemistry, Fujian Institute of Research on the Structure of Matter, Chinese Academy of Sciences, Fuzhou, Fujian 350002, P. R. China.

<sup>2</sup>University of Chinese Academy of Sciences, Chinese Academy of Sciences, Beijing 100049, P. R. China.

<sup>3</sup>School of Physical Science and Technology, ShanghaiTech University, Shanghai 201210, P. R. China.

\*Correspondence: [fw@fjirsm.ac.cn](mailto:fw@fjirsm.ac.cn); [zhj@fjirsm.ac.cn](mailto:zhj@fjirsm.ac.cn)

### Content

|                                                                                  |            |
|----------------------------------------------------------------------------------|------------|
| <b>1. Experimental Section.....</b>                                              | <b>S2</b>  |
| <b>2. Synthesis and characterization. ....</b>                                   | <b>S3</b>  |
| <b>3. Detailed Structure Information. ....</b>                                   | <b>S10</b> |
| <b>4. Supplementary information on host-guest chemistry. ....</b>                | <b>S17</b> |
| <b>5. Crystallographic data, BVS analysis and hydrogen bond parameters. ....</b> | <b>S34</b> |

## 1. Experimental Section.

**Chemicals and Materials:** All the reagents and solvents employed are purchased commercially and used as received without further purification. Aluminum isopropoxide ( $\text{Al}(\text{O}^i\text{Pr})_3$ ), probenecid and imidazole were acquired from Aladdin Chemical Reagent Shanghai. Lead nitrate ( $\text{Pb}(\text{NO}_3)_2$ ), isopropyl alcohol ( $\text{HO}^i\text{Pr}$ ), and *N,N*-dimethylformamide (DMF) were bought from Sinopharm Chemical Reagent Beijing. 1,4-Dioxane, dimethyl sulfoxide (DMSO), benzene, mesitylene, 2,6-dichlorotoluene, anisole, phenylboronic acid pinacol ester, pyrazine, 7-azaindole, 4,4'-bipyridine, 4,4'-vinylenedipyridine, 4,4'-trimethylenedipyridine, and tetrabutylammonium salts, such as tetrabutylammonium nitrate, tetrabutylammonium perchlorate, tetrabutylammonium triflate, tetrabutylammonium tetrafluoroborate and tetrabutylammonium bis((trifluoromethyl)sulfonyl)amide etc., were purchased from Adamas-beta. Lead salicylate and terpineol (mixture of isomer) were purchased from Macklin.

**Energy dispersive spectroscopy (EDS):** The EDS analyses of single crystals were performed on a JEOL JSM6700F field-emission scanning electron microscope equipped with an Oxford INCA system.

**Fourier Transform Infrared (FT-IR) Spectroscopy:** FT-IR spectra were collected on a Bruker VERTEX 70 Spectrometer using attenuated total reflection (ATR) ranging from 400  $\text{cm}^{-1}$  to 4000  $\text{cm}^{-1}$ .

**Powder X-ray diffraction (PXRD):** PXRD data were performed using a Rigaku Miniflex600 diffractometer with Cu  $K\alpha$  radiation ( $\lambda = 1.54056 \text{ \AA}$ ) collected with the angular range ( $2\theta$ ) from  $5^\circ$  to  $50^\circ$  at 298 K.

### UV-vis spectroscopy:

The UV-vis diffuse reflection data were recorded at room temperature using a powder sample with  $\text{BaSO}_4$  as a standard (100% reflectance) on a PerkinElmer Lambda-950 UV spectrophotometer and scanned at 200-800 nm. The absorption data are calculated from the Kubelka-Munk function, ( $F(R) = (1-R)^2/2R$ ), where R representing the reflectance.

### High Resolution Electrospray Ionization Mass Spectra (ESI-MS):

The dissolved samples used for ESI-MS measurements are firstly filtered through membrane filter and diluted, then pumped in Impact II Q-TOP mass spectrometer. The experimental peaks were simulated by DataAnalysis software.

**General methods for X-ray Crystallography:** Crystallographic data were collected on a Rigaku Synergy Custom (Liquid MetalJet D2+) diffractometer with Ga  $K\alpha$  radiation ( $\lambda = 1.3405 \text{ \AA}$ ). The structures were solved with direct methods using OLEX<sup>2</sup> and refined by full-matrix least-squares on  $F^2$  using *SHELXTL*. All hydrogen atoms were theoretical hydrogenation, riding on the relevant atoms and refined with fixed thermal factors. Non-hydrogen atoms were refined anisotropically. All absorption corrections were performed using the multi-scan program.

## 2. Synthesis and characterization.

**Synthesis of  $\text{Al}_{12}\text{Pb}_2(\text{O}^i\text{Pr})_{10}(\mu_2\text{-O}^i\text{Pr})_{12}(\mu_2\text{-OH})_2(\mu_3\text{-O})_6(\mu_5\text{-O})_2$ .**  $\text{Al}(\text{O}^i\text{Pr})_3$  (0.500 g, 2.45 mmol), Lead(II) salicylate (0.144 g, 0.3 mmol), imidazole (0.068 g, 1 mmol) and tetrabutylammonium nitrate (0.100g, 0.3 mmol) were dissolved in  $\text{HO}^i\text{Pr}$  (8 mL) at room temperature. The resultant solution was heated at 80 °C for seven days. After cooling to room temperature, colorless block crystals of were obtained (yield: 5%, based on  $\text{Al}(\text{O}^i\text{Pr})_3$ ). Selected IR peaks ( $\text{cm}^{-1}$ ): 1358 (m), 850 (w), 511 (s). Crystals of  $\text{Al}_{12}\text{Pb}_2$  are unstable in air and easily weathered, making it impossible to characterize it by powder X-ray diffraction.

**Reaction equation of  $\text{Al}_{12}\text{Pb}_2$ :**  $12\text{Al}(\text{O}^i\text{Pr})_3 + 2\text{Pb}(\text{Sal}) + 10\text{H}_2\text{O} + 4\text{IM} \rightarrow \text{Al}_{12}\text{Pb}_2(\text{O}^i\text{Pr})_{10}(\mu_2\text{-O}^i\text{Pr})_{12}(\mu_2\text{-OH})_2(\mu_3\text{-O})_6(\mu_5\text{-O})_2 + 2[\text{HIM}]_2[\text{Sal}] + 14\text{HO}^i\text{Pr}$

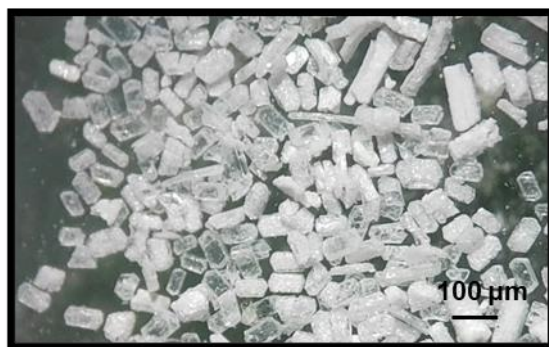

**Supplementary Fig. 1.** Crystal photograph of  $\text{Al}_{12}\text{Pb}_2$ .

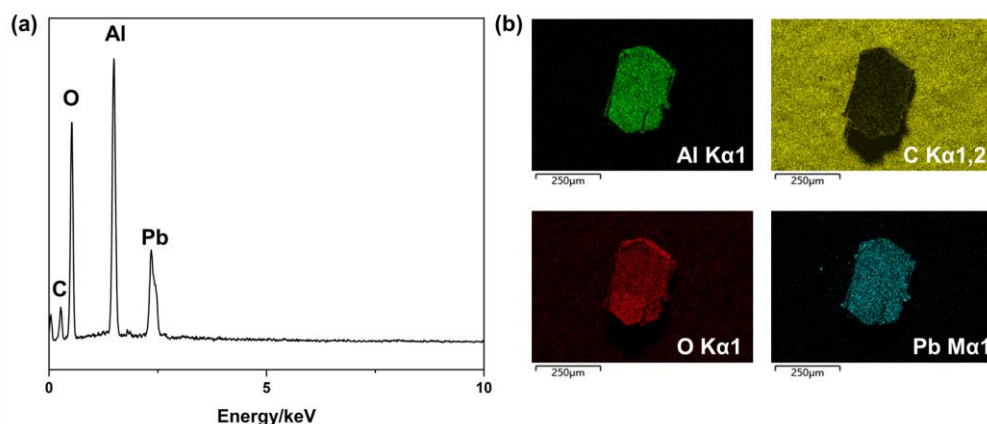

**Supplementary Fig. 2.** (a) Energy dispersive spectroscopy (EDS) of  $\text{Al}_{12}\text{Pb}_2$ . (b) EDS mapping of  $\text{Al}_{12}\text{Pb}_2$ .

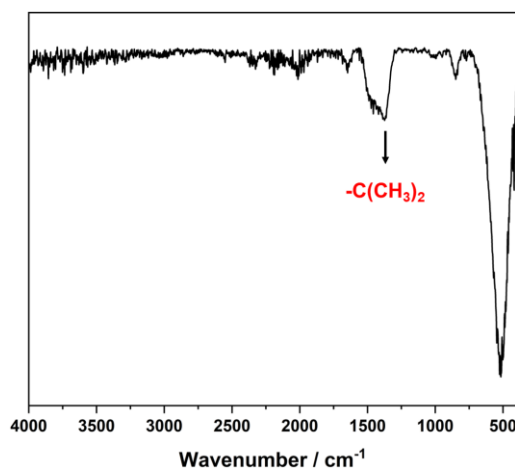

**Supplementary Fig. 3.** Fourier Transform Infrared (FT-IR) Spectroscopy of  $\text{Al}_{12}\text{Pb}_2$ .

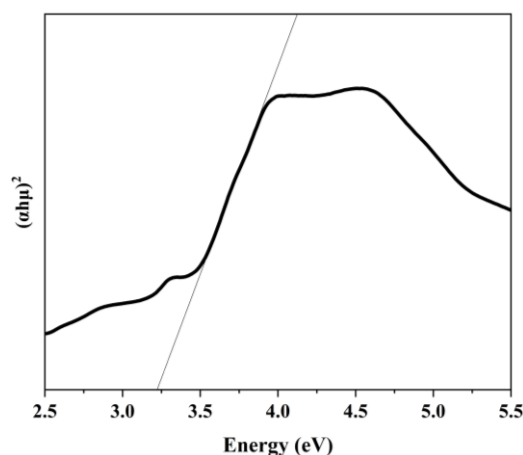

**Supplementary Fig. 4.** The optical bandgap of  $\text{Al}_{12}\text{Pb}_2$ .

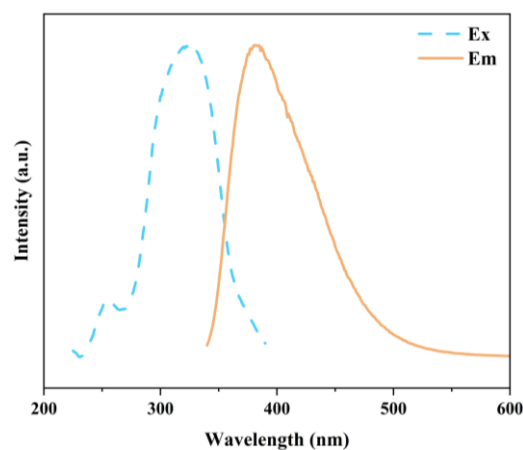

**Supplementary Fig. 5.** Room-temperature photoluminescence spectra of  $\text{Al}_{12}\text{Pb}_2$ .

**Synthesis of  $[\text{Al}_{12}\text{Pb}_4(\text{BA})_6(\text{O}^i\text{Pr})_{10}(\mu_2\text{-OH})_2(\mu_3\text{-O})_8(\mu_4\text{-O})_4]^{2+} \cdot 2[\text{NO}_3]^-$  (BA = benzoic acid).**

$\text{Al}(\text{O}^i\text{Pr})_3$  (0.204 g, 1 mmol), benzoic acid (0.122 g, 1 mmol),  $\text{Pb}(\text{NO}_3)_2$  (0.165 g, 0.5 mmol), imidazole (0.068 g, 1 mmol), tetrabutylammonium nitrate (0.1 g, 0.3 mmol),  $\text{HO}^i\text{Pr}$  (4 mL) and DMF (1 mL) were added to a 20 mL sealed glass vial and placed in a preheated oven at 100 °C for at least 7 days. After cooling to room temperature, a small amount of brown block crystals were obtained (yield: 8%, based on  $\text{Al}(\text{O}^i\text{Pr})_3$ ). Selected IR peaks ( $\text{cm}^{-1}$ ): 2960 (w), 1612 (s), 1570 (s), 1443 (s), 1370 (s), 1123 (m), 983 (w), 868 (m), 778 (s), 705 (s), 669 (s), 602 (m), 505 (s).

Reaction equation of  $\text{Al}_{12}\text{Pb}_4$ :  $12\text{Al}(\text{O}^i\text{Pr})_3 + 4\text{Pb}(\text{NO}_3)_2 + 6\text{HBA} + 28\text{H}_2\text{O} + 6\text{IM} \rightarrow [\text{Al}_{12}\text{Pb}_4(\text{BA})_6(\text{O}^i\text{Pr})_{10}(\mu_2\text{-OH})_2(\mu_3\text{-O})_8(\mu_4\text{-O})_4]^{2+} \cdot 2[\text{NO}_3]^- + 6[\text{HIM}][\text{NO}_3] + 26\text{HO}^i\text{Pr}$

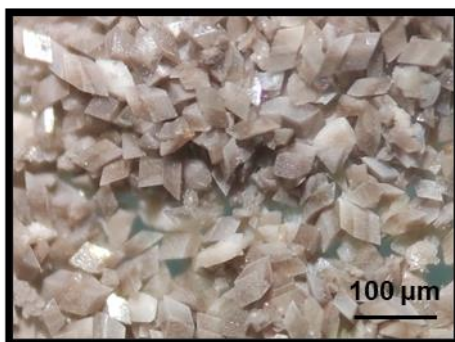

**Supplementary Fig. 6.** Crystal photograph of  $\text{Al}_{12}\text{Pb}_4$ .

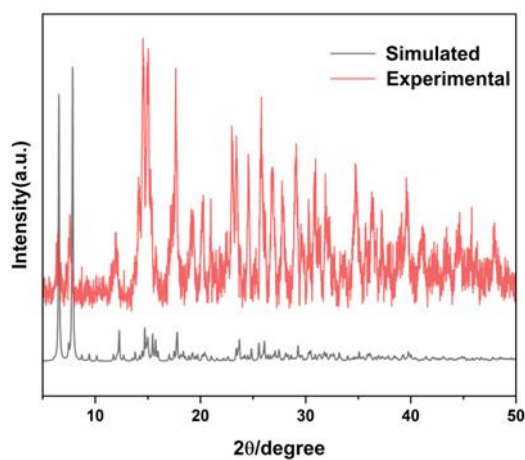

**Supplementary Fig. 7.** Powder X-ray diffraction (PXRD) pattern of  $\text{Al}_{12}\text{Pb}_4$ .

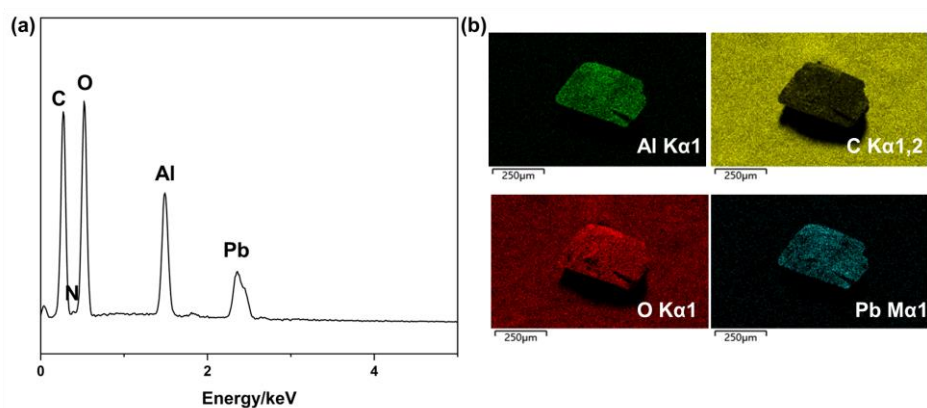

**Supplementary Fig. 8.** (a) Energy dispersive spectroscopy (EDS) of  $\text{Al}_{12}\text{Pb}_4$ . (b) EDS mapping of  $\text{Al}_{12}\text{Pb}_4$ .

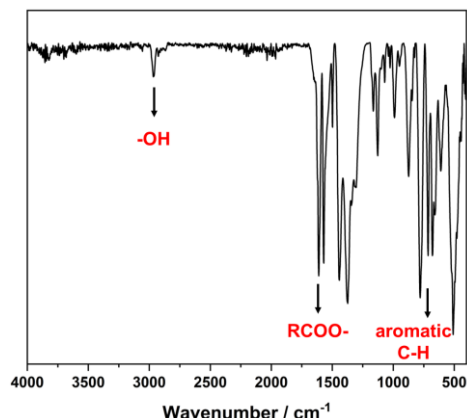

**Supplementary Fig. 9.** Fourier Transform Infrared (FT-IR) Spectroscopy of  $\text{Al}_{12}\text{Pb}_4$ .

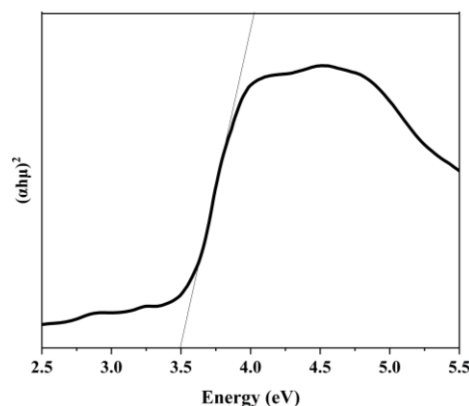

**Supplementary Fig. 10.** The optical bandgap of  $\text{Al}_{12}\text{Pb}_4$ .

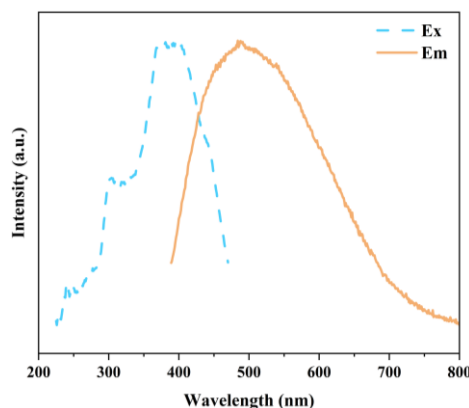

**Supplementary Fig. 11.** Room-temperature photoluminescence spectra of  $\text{Al}_{12}\text{Pb}_4$ .

**Synthesis of  $\text{Al}_{32}\text{Pb}_6\text{L}_{12}(\mu_2\text{-O}^i\text{Pr})_{20}(\mu_2\text{-OH})_8(\mu_3\text{-O})_{28}(\mu_4\text{-O})_4(\mu_5\text{-O})_2$  (L = probenecid).**  $\text{Al}(\text{O}^i\text{Pr})_3$  (0.204 g, 1 mmol), probenecid (0.1 g, 0.35 mmol),  $\text{Pb}(\text{NO}_3)_2$  (0.1 g, 0.3 mmol), imidazole (0.068 g, 1 mmol),  $\text{HO}^i\text{Pr}$  (4 mL) and DMF (1 mL) were added to a 20 mL sealed glass vial and placed in a preheated oven at 100 °C for at least 7 days. After cooling to room temperature, the bottle cap was slightly loosened to allow the solvent to evaporate slowly. After at least one week, a small amount of brown block crystals were obtained (yield: 1%, based on probenecid). Selected IR peaks ( $\text{cm}^{-1}$ ): 3371 (s), 2967 (m), 2934 (m), 2873 (m), 1642 (m), 1592 (m), 1548 (m), 1382 (s), 1327 (s), 1151 (s), 1084 (m), 995 (m), 1084 (m), 863 (s), 598 (s).

**Reaction equation of SAIOC-1:**  $32\text{Al}(\text{O}^i\text{Pr})_3 + 6\text{Pb}(\text{NO}_3)_2 + 12\text{HL} + 42\text{H}_2\text{O} + 12\text{IM} \rightarrow \text{Al}_{32}\text{Pb}_6\text{L}_{12}(\mu_2\text{-O}^i\text{Pr})_{20}(\mu_2\text{-OH})_8(\mu_3\text{-O})_{28}(\mu_4\text{-O})_4(\mu_5\text{-O})_2 + 12[\text{HIM}][\text{NO}_3] + 76\text{HO}^i\text{Pr}$

**Tips:** The addition of tetrabutylammonium salts (~100 mg) can improve the repeatability of the reaction to a certain extent, but it is not necessary. Available tetrabutylammonium salts include tetrabutylammonium nitrate, tetrabutylammonium perchlorate, tetrabutylammonium triflate, tetrabutylammonium tetrafluoroborate and tetrabutylammonium bis((trifluoromethyl)sulfonyl)amide etc. These different anions will not affect the neutral product. The solvent evaporation process should be carried out at 10-15°C as much as possible, because too high a temperature will easily cause the solution to turn into a gel, while at too low a temperature the evaporation will be too slow and crystals will be difficult to precipitate. If the volatilization process can be continued for more than one month, there is a certain probability of obtaining several crystals of a size suitable for single crystal research.

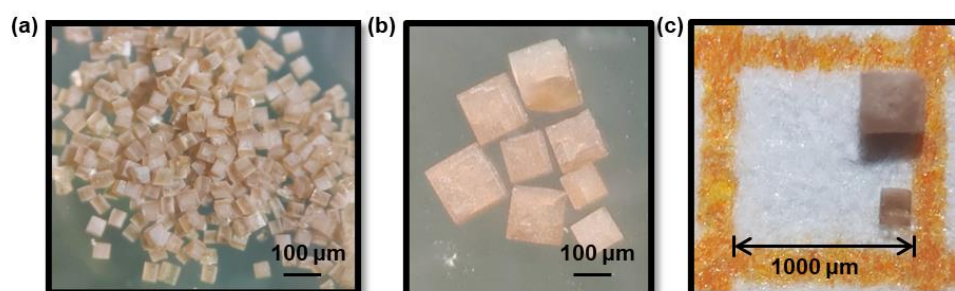

**Supplementary Fig. 12.** (a) Photo of ordinary crystals of **SAIOC-1**. (b) Photo of high-quality crystals of **SAIOC-1** obtained after long-term volatilization. (c) Size comparison of ordinary crystals and high-quality crystals of **SAIOC-1**.

**Characterization of SAIOC-1.** The difficulty in crystallization of **SAIOC-1** may be due to the large number of flexible alkyl chains on the peripheral ligands. The yield of **SAIOC-1** is low, so in the main text we focus on its single-crystal-to-single-crystal behavior. However, we still tried our best to remove impurities and picked out some pure samples for characterization. The phase purity of the compound was confirmed by PXRD (**Supplementary Fig. 13**). The elements and functional groups present in the compound were also confirmed by EDS (**Supplementary Fig. 14**) and FT-IR (**Supplementary Fig. 15**) spectroscopy, respectively. The calculated band gap for **SAIOC-1** is 3.17 eV (**Supplementary Fig. 17**), which is lower than many aluminum-oxo clusters. In addition, photoluminescence close to white light (0.31, 0.35) was observed from **SAIOC-1** with a quantum yield of 1.62% (**Supplementary Fig. 18**). These results indicate that the introduction of Pb(II) and the metal-ligand interaction can effectively affect the optical absorption and emission behaviors of the Al<sub>32</sub> sphere.

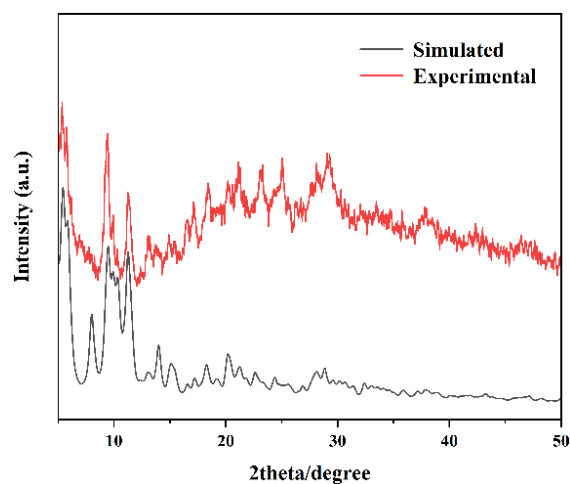

**Supplementary Fig. 13.** Powder X-ray diffraction (PXRD) pattern of **SAIOC-1**.

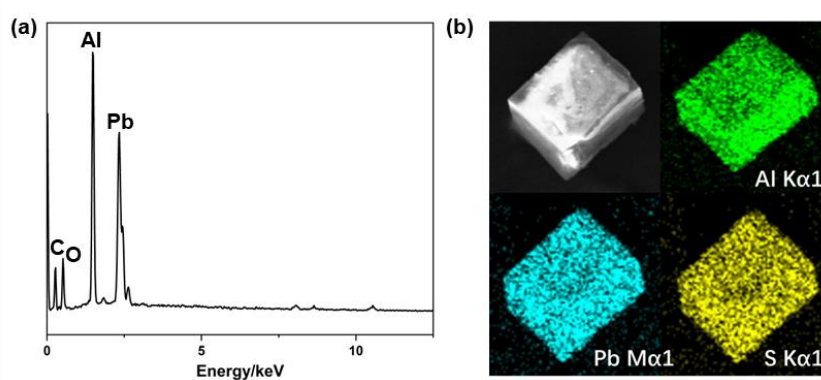

**Supplementary Fig. 14.** (a) Energy dispersive spectroscopy (EDS) of **SAIOC-1**. (b) EDS mapping of **SAIOC-1**.

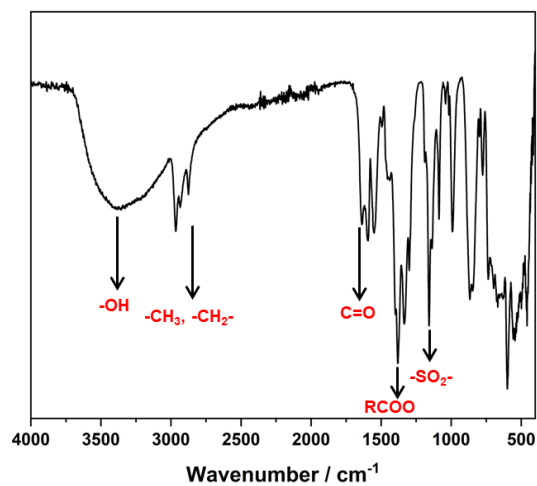

**Supplementary Fig. 15.** Fourier Transform Infrared (FT-IR) Spectroscopy of **SAIOC-1**.



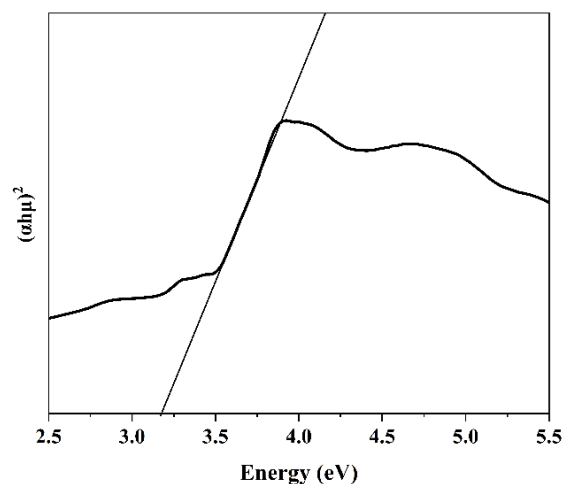

**Supplementary Fig. 16.** The optical bandgap of **SAIOC-1**.

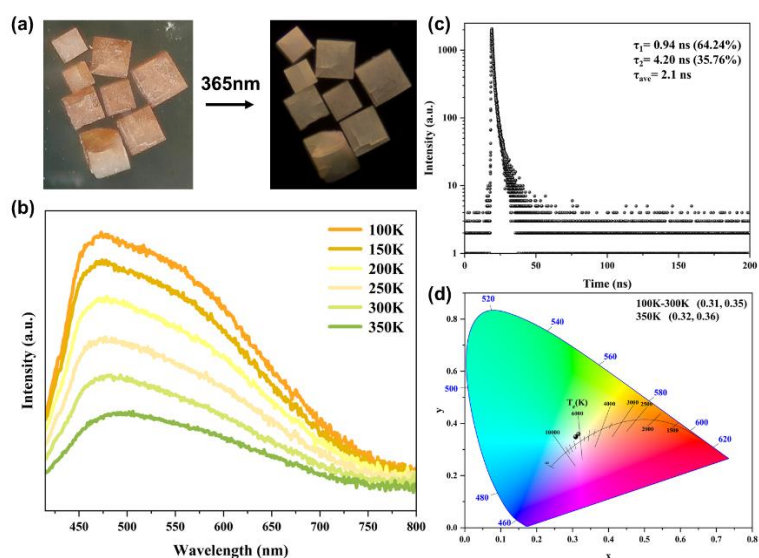

**Supplementary Fig. 17.** (a) Photoluminescence image of **SAIOC-1**. (b) Temperature-changing emission curve of  $\text{Al}_{32}$ . (c) Fluorescence lifetime of **SAIOC-1**. (d) Fluorescence chromaticity diagram of **SAIOC-1**.

### 3. Detailed Structure Information.

#### 3.1 Molecular structure of $\text{Al}_{12}\text{Pb}_2$ .

$\text{Al}_{12}\text{Pb}_2$  crystallizes in the  $C2/c$  space group. It helps us understand the bonding mode of the two metals because the metals are only bridged by isopropanol or oxygen atoms, and the carboxylic acid ligands do not participate in the coordination.  $\text{Al}_{12}\text{Pb}_2$  can be regarded as a dimeric structure with the  $\text{Al}_4\text{Pb}$  unit as the core, which is based on the combination of two types of  $\text{Al}_3\text{O}_3$  fragments through edge sharing. The  $\text{Pb}^{2+}$  ion is connected to four  $\text{Al}^{3+}$  claws through  $\mu_2\text{-O}^i\text{Pr}$  and is firmly anchored in the center through  $\mu_4\text{-O}$ . This fragment means that when we try to obtain a closed aluminum oxo cluster, The  $\text{Pb}^{2+}$  ion may be located at its periphery, acting as a structural director with its large radius and stereochemically active lone electron pair. The side view of  $\text{Al}_{12}\text{Pb}_2$  is wavy because the  $\text{Al}_4\text{Pb}$  unit is arched. If these arched units can be enclosed, it is possible to obtain a spherical structure. Another point worth noting is that the aluminum ions in the  $\text{Al}_4\text{Pb}$  unit tend to adopt four or five coordinations rather than the most common six coordinations. The lower coordination number may be conducive to the formation of a hollow spherical structure.

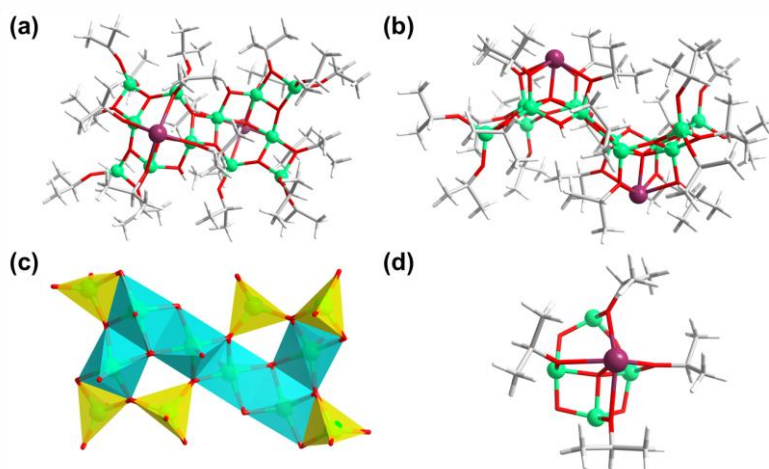

**Supplementary Fig. 18.** Molecular structure of  $\text{Al}_{12}\text{Pb}_2$ . (a) Top view. (b) Side view. Color code: Pb: purple, Al: green, O: red, C: grey, H: white. (c) Coordination environments of  $\text{Al}^{3+}$  ions in  $\text{Al}_{12}\text{Pb}_2$ . Color code: tetraordinated aluminum: yellow; pentacoordinate: blue; hexacoordinated: green. (d) The arched  $\text{Al}_4\text{Pb}$  unit in  $\text{Al}_{12}\text{Pb}_2$ .

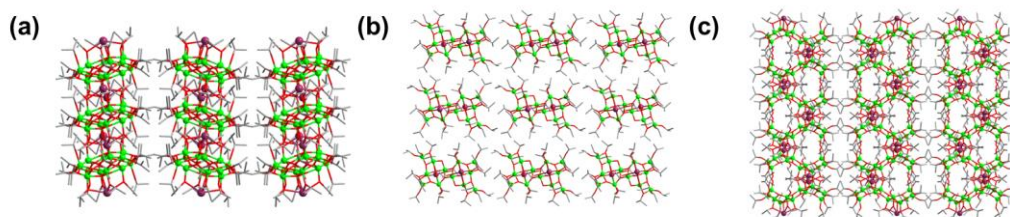

**Supplementary Fig. 19.** Packing diagrams of  $\text{Al}_{12}\text{Pb}_2$  in the view of (a) a-axis, (b) b-axis and (c) c-axis. Colour code: Pb: purple, Al: green, O: red, C: grey.

### 3.2 Molecular structure of $\text{Al}_{12}\text{Pb}_4$ .

$\text{Al}_{12}\text{Pb}_4$  crystallizes in the  $C2/c$  space group. This is a -2-valent cation cluster, with two nitrate groups connected by hydrogen bonds on the periphery to balance the charge. The  $\text{Al}_{12}$  mini capsule is co-encapsulated by benzoic acid and Pb (II), and its structure can be regarded as a tetramer formed by the condensation of  $\text{Al}_4\text{Pb}$  units in a "head-to-head, tail-to-tail" manner. The introduction of carboxylic acid ligands replaced part of the isopropanol in the  $\text{Al}_4\text{Pb}$  unit and makes the curvature of this arched unit increased. Although we completed the enclosure of the structural unit and obtained a mini capsule that was approximately spherical, the strong  $\pi$ - $\pi$  interaction between the ligands prevented the further expansion of the structure. This encouraged us to further explore using flexible steric ligands.

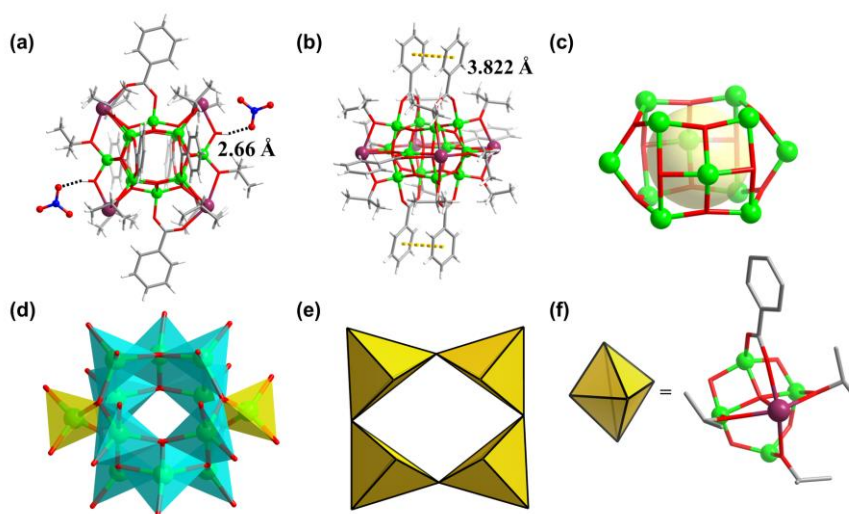

**Supplementary Fig. 20.** Molecular structure of  $\text{Al}_{12}\text{Pb}_4$ . (a) Top view and host-guest hydrogen bonds. (b) Side view and  $\pi$ - $\pi$  interaction intramolecular. Color code: Pb: purple, Al: green, O: red, C: grey, H: white, N: blue. (c) Hollow mini capsule core. (d) Coordination environments of  $\text{Al}^{3+}$  ions in  $\text{Al}_{12}\text{Pb}_4$ . Color code: tetracoordinated aluminum: yellow; pentacoordinate: blue; hexacoordinated: green. (e) Schematic diagram of the  $\text{Al}_4\text{Pb}$  unit closure. (f) The  $\text{Al}_4\text{Pb}$  unit in  $\text{Al}_{12}\text{Pb}_4$ .

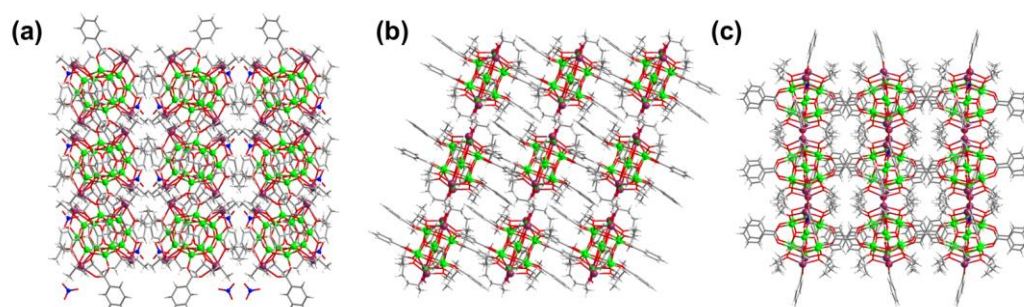

**Supplementary Fig. 21.** Packing diagrams of  $\text{Al}_{12}\text{Pb}_4$  in the view of (a) a-axis, (b) b-axis and (c) c-axis. Color code: Pb: purple, Al: green, O: red, C: grey, H: white, N: blue.

### 3.3 Molecular structure of SAIOC-1.

#### Core-shell structure

The alkyl chains surrounding the clusters often make structure elucidation challenging, and high-quality single crystals helped us achieve this goal. Single crystal X-ray diffraction revealed that the compound crystallized in the  $P4/n$  space group (No. 85). Intuitively, the overall structure of compound **SAIOC-1** can be seen as an ellipsoidal egg-shaped (molecular size: 3.1 nm\*3.1 nm\*2.5 nm) core shell structure. It contains three shell including the innermost  $\text{Al}_{32}$  sphere surrounded by a "double armor" consisting of six lead atoms in the middle shell and outermost organic protect shell. The discovery of spherical  $\text{Al}_{32}$  core not only represents one of the highest nuclear aluminum oxo clusters in organic phase, but also is an unprecedented structural type in the hydrolysis chemistry of Al(III). Another point worth noting is that all aluminum atoms in the sphere are at a lower coordination number of four or five compared with the previous typical Keggin, hydrotalcite, molecular rings, Archimedes polyhedral structures dominated by six-coordinated Al(III) ions. This may also be the key factor in the formation of the unique spherical structure. Interestingly, compared to classic "truncated octahedron + cube"  $\text{M}_{32}$  clusters ( $\text{O}_h$ ), the  $\text{Al}_{32}$  sphere retains the "24+8" arrangement but with a  $45^\circ$  twist ( $\text{D}_{4d}$ ). The polyhedral twist may be attributed to the control of the organic shell and is very rare because it seems to contradict the high symmetry of the spherical structure. Importantly, lower symmetry is considered to be beneficial for host-guest chemistry studies because it reduces disorder of the guest molecules across the symmetry elements.

The six lead ions in the middle shell not only serve to confine the  $\text{Al}_{32}$  core, but also harmonize the large steric hindrance of the ligands, playing a significant role in mediating and stabilizing the structure effectively. These ions are arranged in an octahedral configuration: two are anchored at the poles via four  $\mu_2\text{-O}^i\text{Pr}$  and one  $\mu_5\text{-O}$ , while the other four are fixed at the vertices of the equatorial plane by three  $\mu_2\text{-O}^i\text{Pr}$ , one  $\mu_4\text{-O}$ , and one  $\mu_2\text{-COO}$  from the ligand. All of them are pentacoordinated with tetrahedral-pyramidal geometry, influenced by stereochemically active lone pair electrons.

The outermost organic protect shell comprises twenty isopropyl alcohol groups and twelve relatively long ligands. The twenty isopropanol groups link the inner sphere to the middle shell, of which twelve are assigned to the four lead ions on the equatorial plane and the remaining eight correspond to the poles. The twelve ligands are unevenly distributed: eight on the upper hemisphere and four on the lower hemisphere. They can be categorized into three types according to their coordination environment. The first type bridges the inner sphere and the middle layer on the equatorial plane in a  $\mu_2\text{-(O',O'')}$  mode ( $\text{L}_I$ ). Compared to isopropanol, these ligands connect metal ions that are farther apart, resulting in weaker coordination ( $\text{Pb-O}_{\text{carboxyl}}$  2.643 Å, longer than 2.440-2.466 Å of  $\text{Pb-O}_{\text{isopropanol}}$ ), and all oriented towards the upper hemisphere. In addition, the other eight ligands adopt a monodentate mode: four on pentacoordinated aluminum ions of the upper hemisphere ( $\text{L}_{II}$ ) and four on tetracoordinated aluminum ions of the lower hemisphere ( $\text{L}_{III}$ ). Their distribution is controlled by strong hydrogen bonding with  $\mu_2\text{-OH}$  on the inorganic core ( $\text{O-H}\cdots\text{O}$  2.567-2.675 Å). This unusual mode of predominantly monodentate coordination depends not only on the raised inorganic core and intramolecular interactions, but also on the repulsive forces between ligands, and may also be affected by the

attraction of neighboring clusters (see next section). Ultimately, these three shells are interdependent and mutually influential, forming a structure that, while less symmetrical than typical spheres, achieves a high degree of harmony.

### Supercluster assembly

Similar to nanoparticles, the spherical structure allows for complete exposure of surface sites. Our statistical analysis reveals that in addition to six metal sites in the central layer, there are 12  $\pi$  sites, 32 hydrogen bond acceptors, and up to 120 donors provided by the probenecid ligand.  $L_I$  serves as both a hydrogen bond acceptor (sulfonyl group) and a donor (alkyl chain), binding to  $L_{III}$  of two adjacent spheres (C-H...O distances of 3.15-3.80 Å). The influence of  $L_{II}$  does not involve hydrogen bonding, but rather tetrel bonding interactions between the sulfonyl group and lead. The Pb-O distance measures 3.30 Å, approaching its bond length limit.  $L_{III}$  strongly binds to the adjacent sphere through complementary hydrogen bonds between the sulfonyl group and the aromatic ring (C-H...O distance of 3.21 Å), while also interacting with  $L_I$  of two neighboring spheres (C-H...O distances of 3.15-3.80 Å). Numerous interactions between superclusters not only impact the distribution of ligands on the sphere but crucially enable the discrete system to form highly stable configurations akin to buckles or puzzle pieces, laying a solid foundation for research in solid-state host-guest chemistry.

Because Pb occupies the inorganic core space, the number of peripheral organic protective ligands is effectively reduced, promotes the formation of pores within and between clusters. Each hemisphere of the sphere features a small cup-shaped cavity, encircled by four  $L_I$  and four  $L_{III}$  respectively, with opening widths of approximately 15.4 Å and 14.0 Å. Cavities on the sphere's sides are four irregular polyhedral spaces, bordered by surface ligands from neighboring spheres. These locations serve as ideal place for accommodating guests. Studies in host-guest chemistry indicate that guests typically favor entering these side cavities due to their increased number of supramolecular interaction sites.

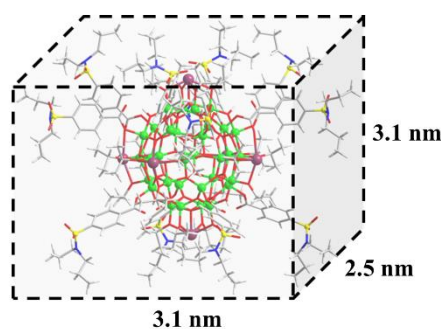

**Supplementary Fig. 22.** Molecular size of SAIOC-1.



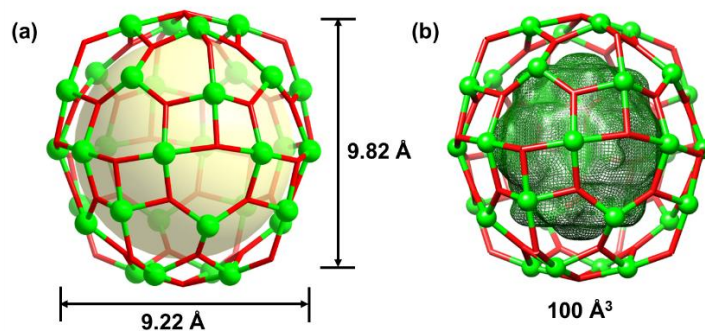

**Supplementary Fig. 23.** (a) Size of Al<sub>32</sub> inner sphere. (b) The cavity of Al<sub>32</sub> inner sphere calculated via 3V Volume Assessor program.

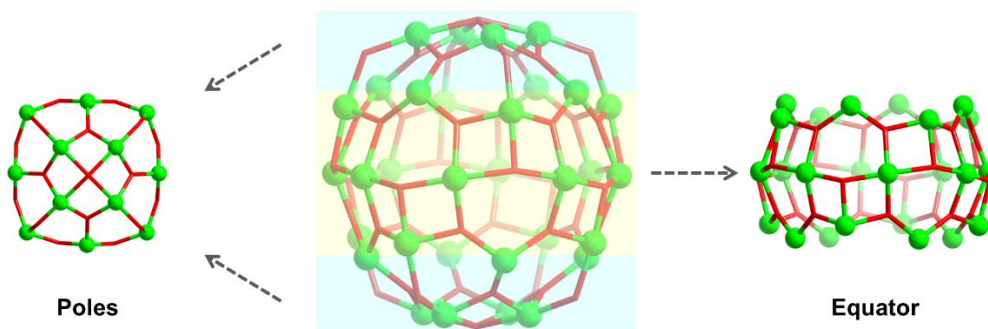

**Supplementary Fig. 24.** The equator and poles of Al<sub>32</sub> sphere defined by different combinations of aluminum-oxo units.

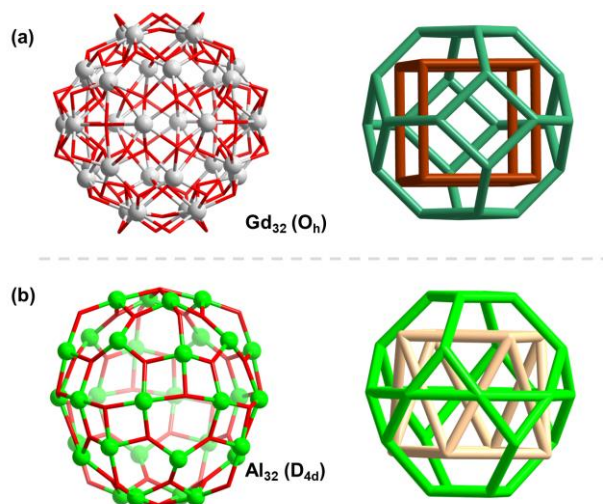

**Supplementary Fig. 25.** Comparison of the Al<sub>32</sub> core with the classical high-symmetry 32-nuclear cluster.

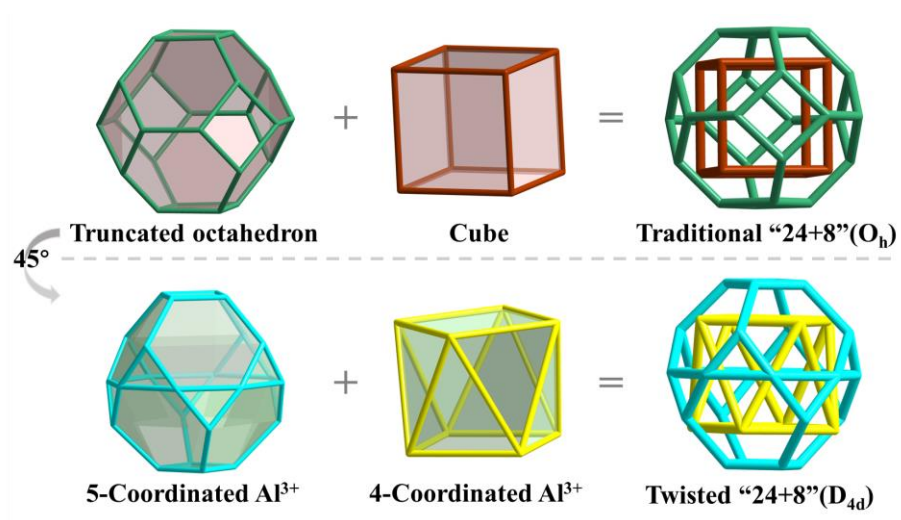

**Supplementary Fig. 26.** Twisted from Platonic and Archimedean polyhedra into polyhedra in  $Al_{32}$ .

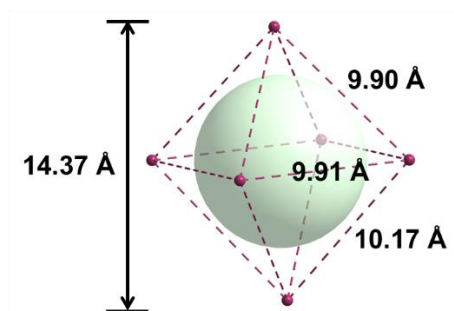

**Supplementary Fig. 27.** Size of the intermediate layer ( $Pb_6$  octahedron).

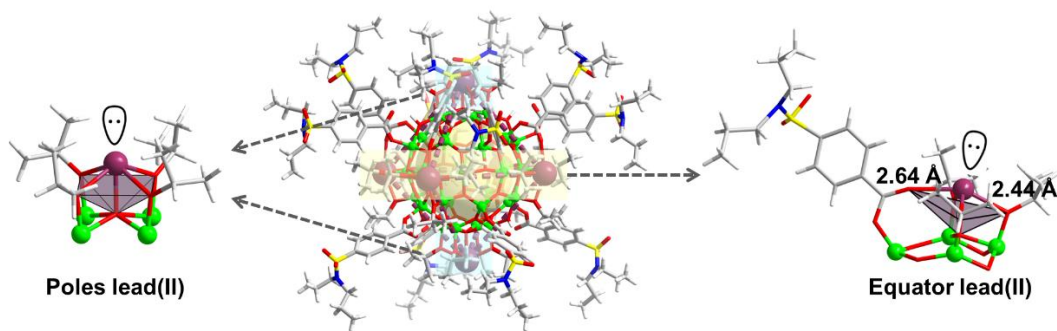

**Supplementary Fig. 28.** Two different coordination environments of lead ions.

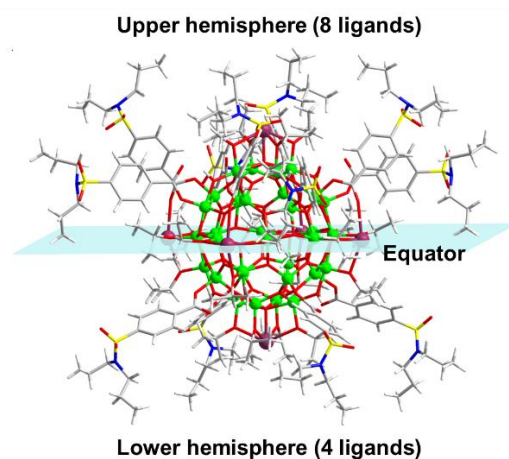

**Supplementary Fig. 29.** Upper and lower hemispheres defined by the number of ligands.

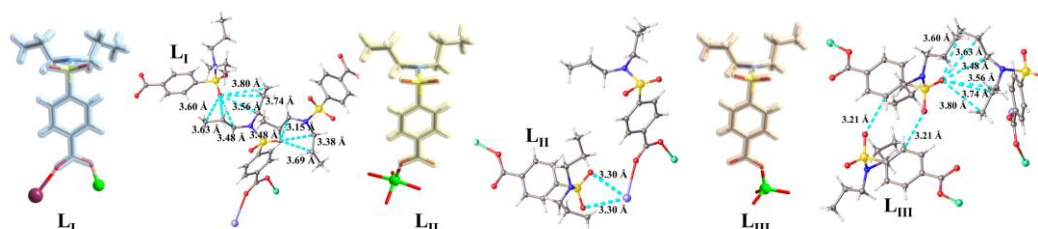

**Supplementary Fig. 30.** Supramolecular interactions of the organic shell of **SAIOC-1**. (L<sub>I</sub>: bridging ligand on the upper hemisphere, L<sub>II</sub>: monodentate ligand on the upper hemisphere, L<sub>III</sub>: monodentate ligand on the lower hemisphere)

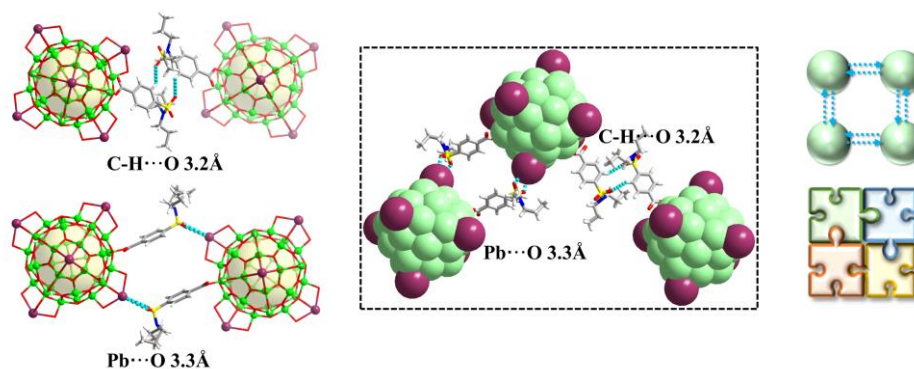

**Supplementary Fig. 31.** Supramolecular assembly as robust as a lock or puzzle in **SAIOC-1**.

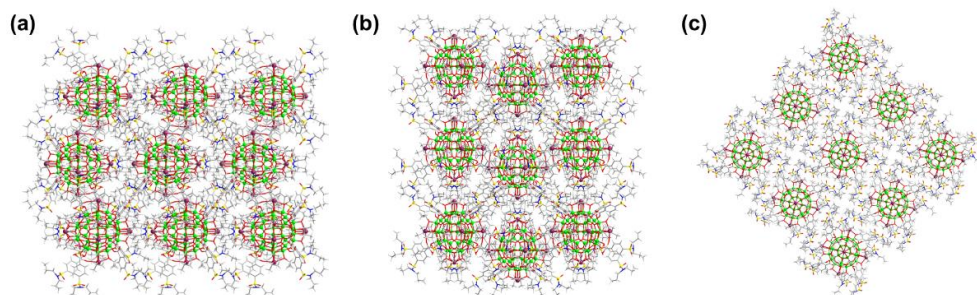

**Supplementary Fig. 32.** Stacking pattern of **SAIOC-1** view along (a) a-axis, (b) b-axis and (c) c-axis.



#### 4. Supplementary information on host-guest chemistry.

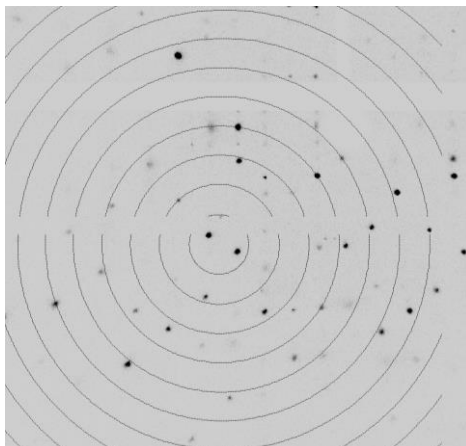

**Supplementary Fig. 33.** Diffraction image of a single crystal of **SAIOC-1** after being immersed in isopropanol for six months.

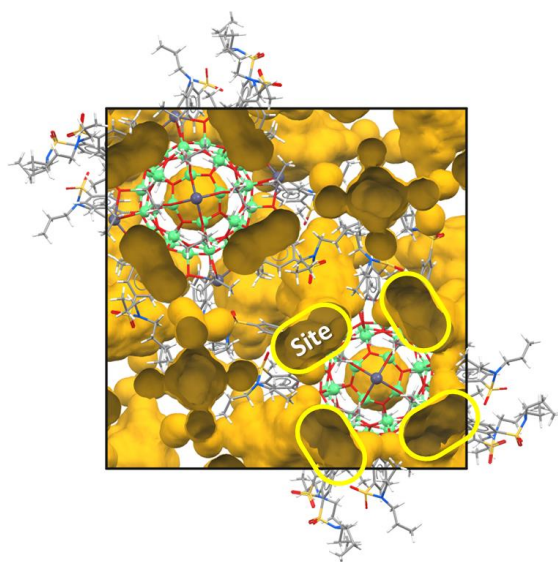

**Supplementary Fig. 34.** Potential guest-binding pockets in **SAIOC-1**.

#### 4.1 Host-guest chemistry of SAIOC-1@G1.

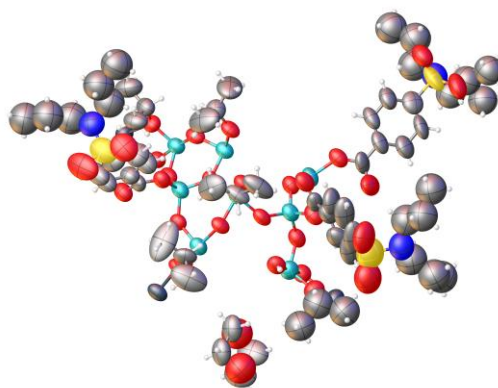

**Supplementary Fig. 35.** ORTEP diagrams (Thermal ellipsoids displayed at 50% probability) of the asymmetric unit of **SAIOC-1@G1**.

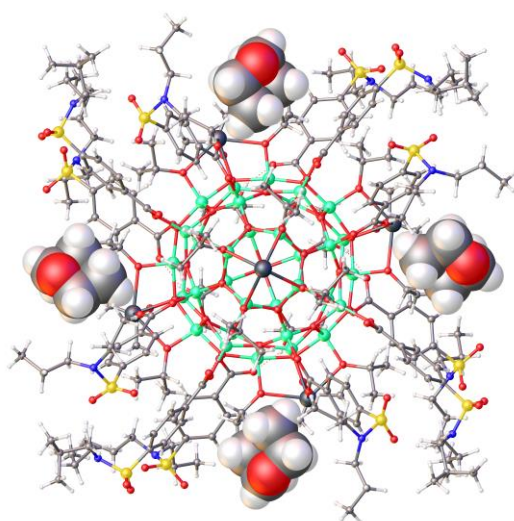

**Supplementary Fig. 36.** Molecular structure of **SAIOC-1@G1**.

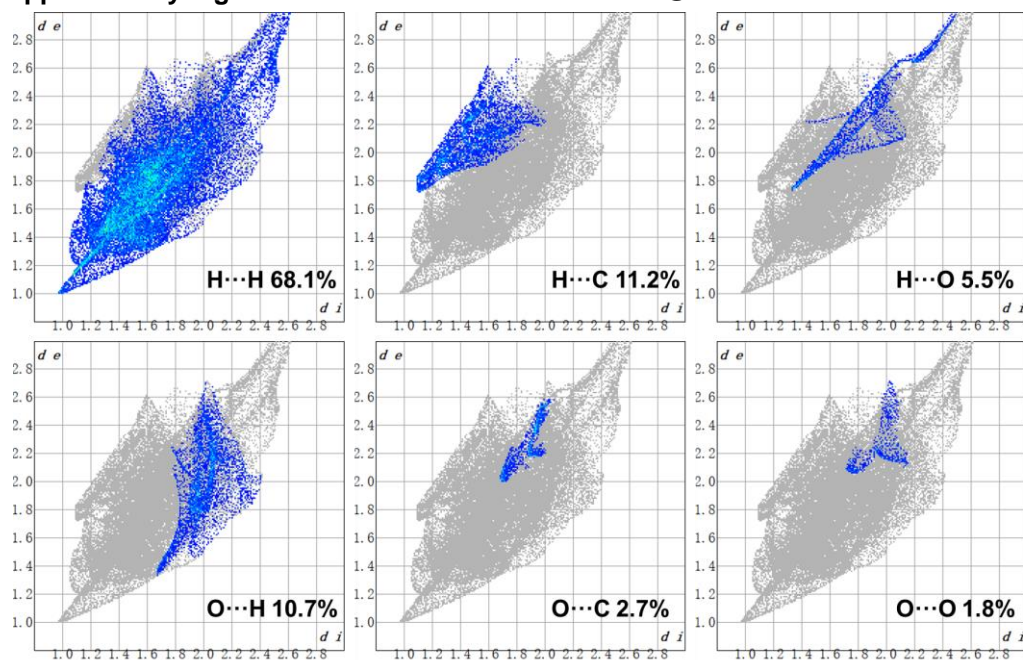

**Supplementary Fig. 37.** The 2D Hirshfeld fingerprint plots of **SAIOC-1@G1**.

## 4.2 Host-guest chemistry of SAIOC-1@G2.

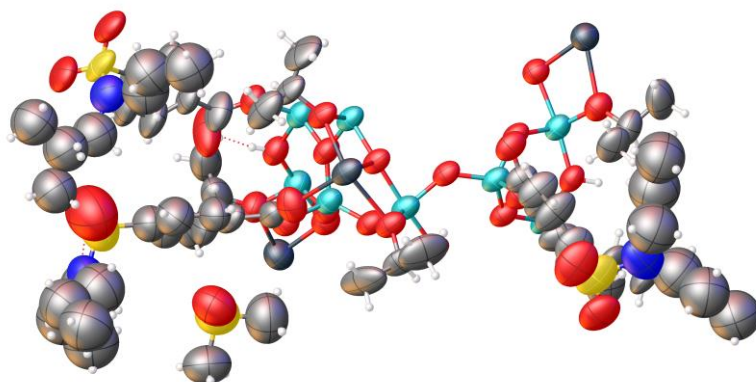

**Supplementary Fig. 38.** ORTEP diagrams (Thermal ellipsoids displayed at 50% probability) of the asymmetric unit of **SAIOC-1@G2**.

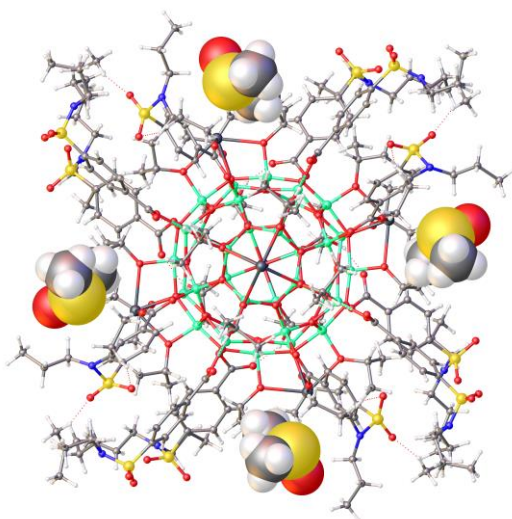

**Supplementary Fig. 39.** Molecular structure of **SAIOC-1@G2**.

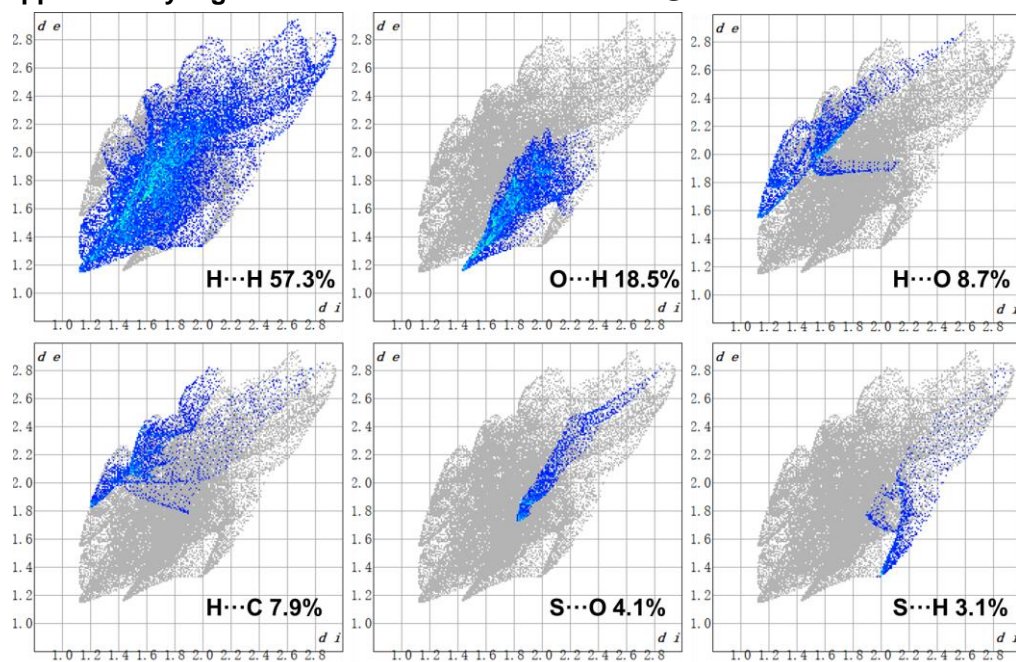

**Supplementary Fig. 40.** The 2D Hirshfeld fingerprint plots of **SAIOC-1@G2**.



### 4.3 Host-guest chemistry of SAIOC-1@G3.

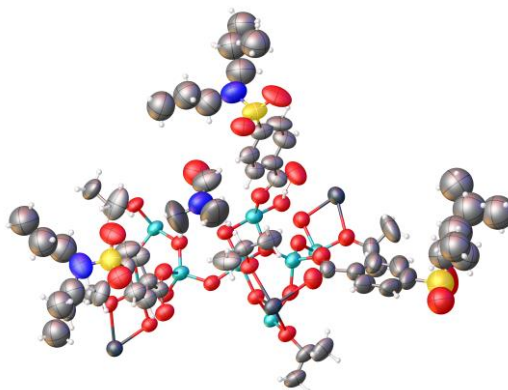

**Supplementary Fig. 41.** ORTEP diagrams (Thermal ellipsoids displayed at 50% probability) of the asymmetric unit of **SAIOC-1@G3**.

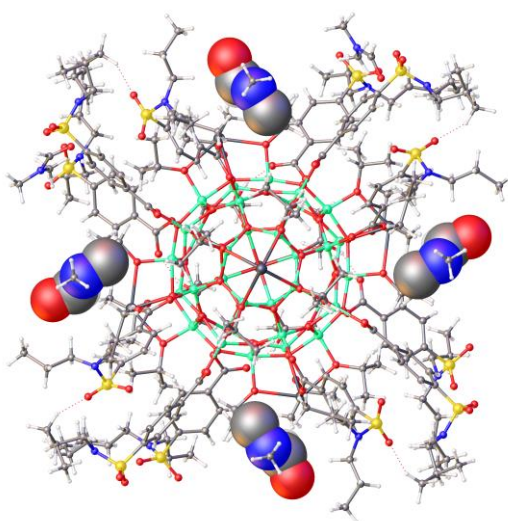

**Supplementary Fig. 42.** Molecular structure of **SAIOC-1@G3**.

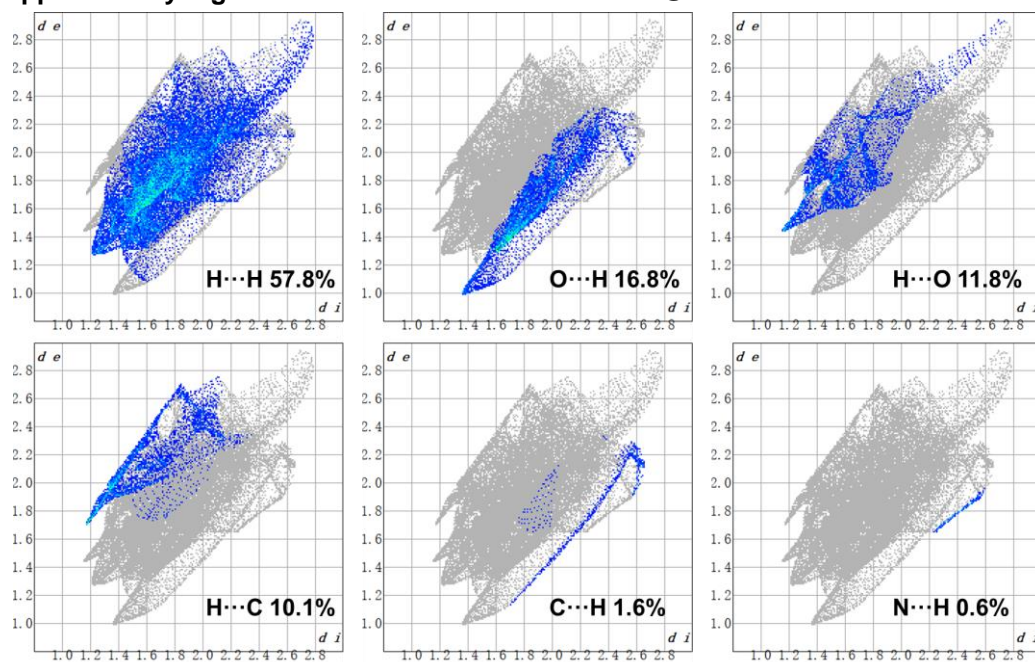

**Supplementary Fig. 43.** The 2D Hirshfeld fingerprint plots of **SAIOC-1@G3**.

#### 4.4 Host-guest chemistry of SAIOC-1@G4.

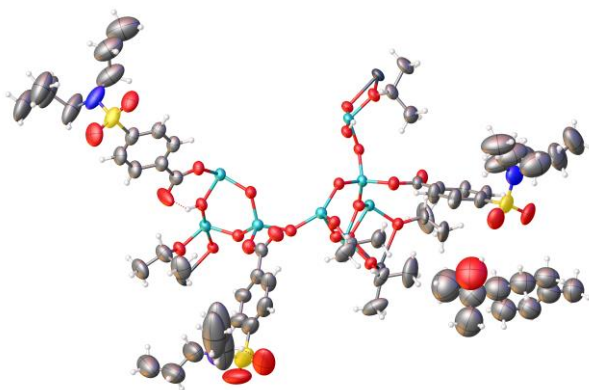

**Supplementary Fig. 44.** ORTEP diagrams (Thermal ellipsoids displayed at 50% probability) of the asymmetric unit of **SAIOC-1@G4**.

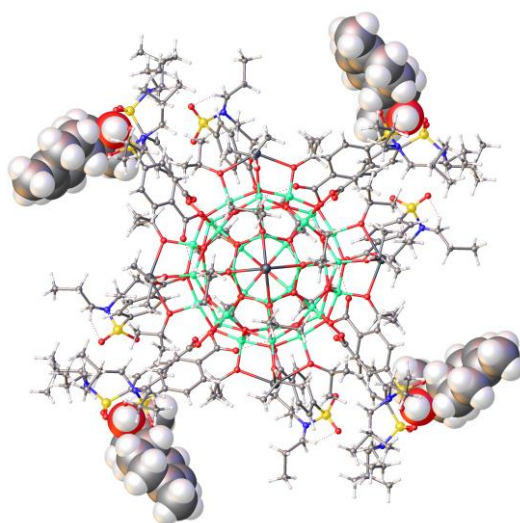

**Supplementary Fig. 45.** Molecular structure of **SAIOC-1@G4**.

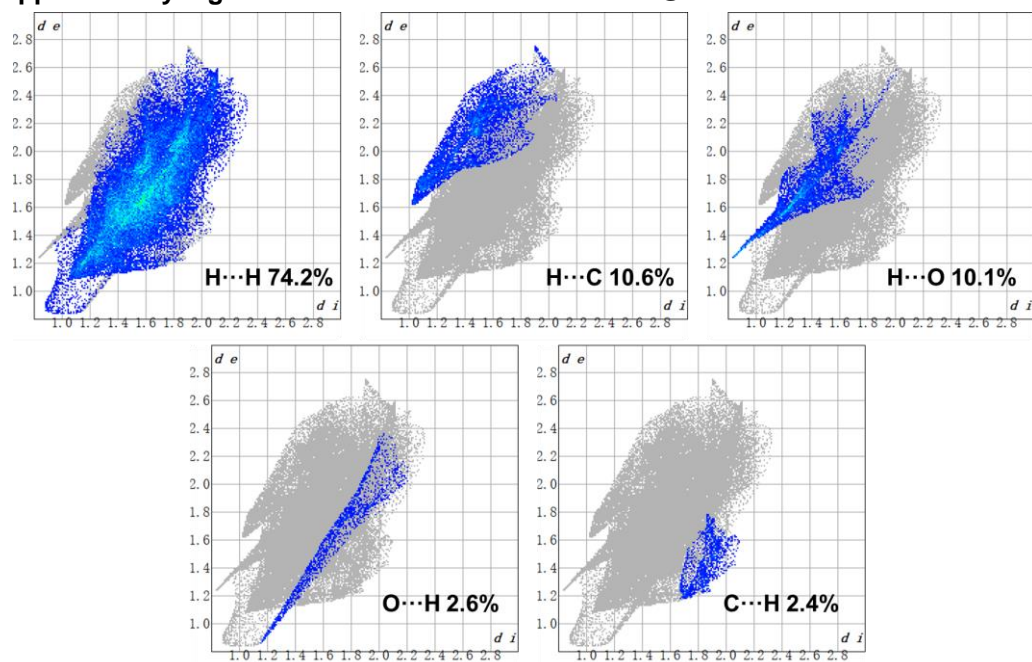

**Supplementary Fig. 46.** The 2D Hirshfeld fingerprint plots of **SAIOC-1@G4**.

#### 4.5 Host-guest chemistry of SAIOC-1@G5.

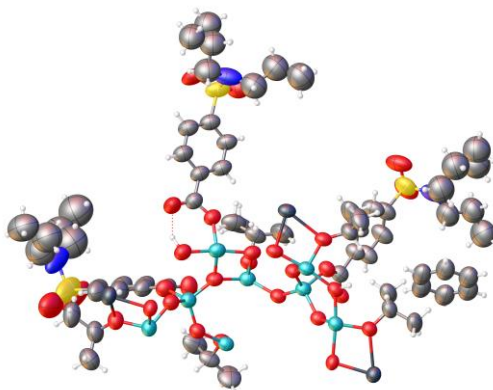

**Supplementary Fig. 47.** ORTEP diagrams (Thermal ellipsoids displayed at 50% probability) of the asymmetric unit of **SAIOC-1@G5**.

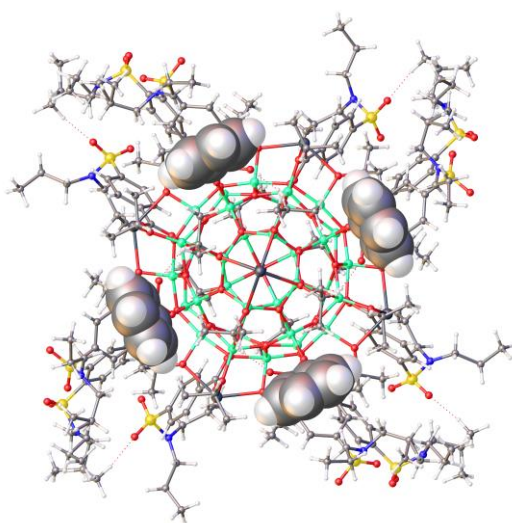

**Supplementary Fig. 48.** Molecular structure of **SAIOC-1@G5**.

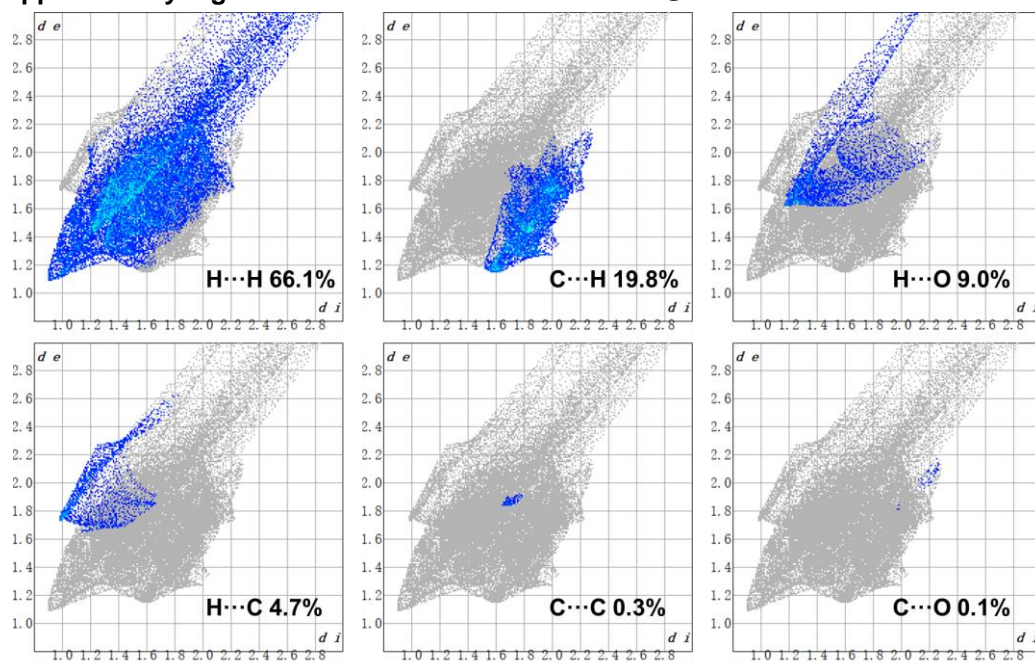

**Supplementary Fig. 49.** The 2D Hirshfeld fingerprint plots of **SAIOC-1@G5**.



#### 4.6 Host-guest chemistry of SAIOC-1@G6.

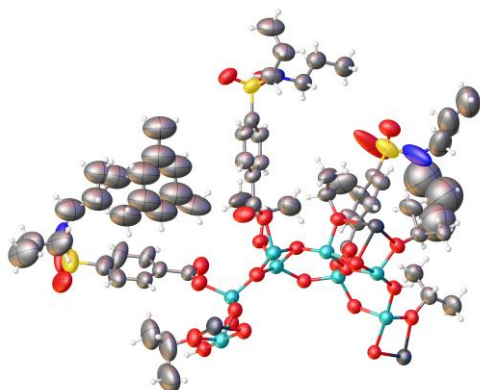

**Supplementary Fig. 50.** ORTEP diagrams (Thermal ellipsoids displayed at 50% probability) of the asymmetric unit of **SAIOC-1@G6**.

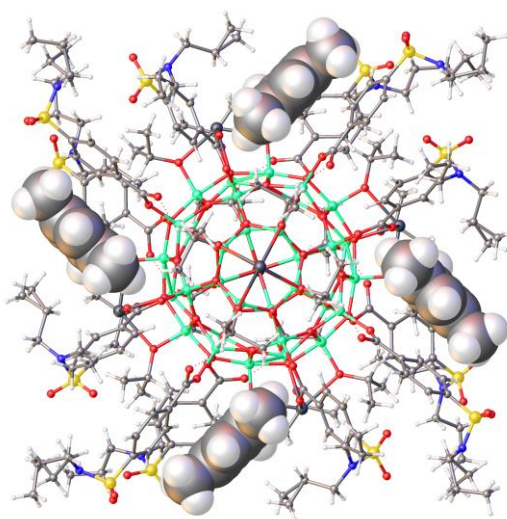

**Supplementary Fig. 51.** Molecular structure of **SAIOC-1@G6**.

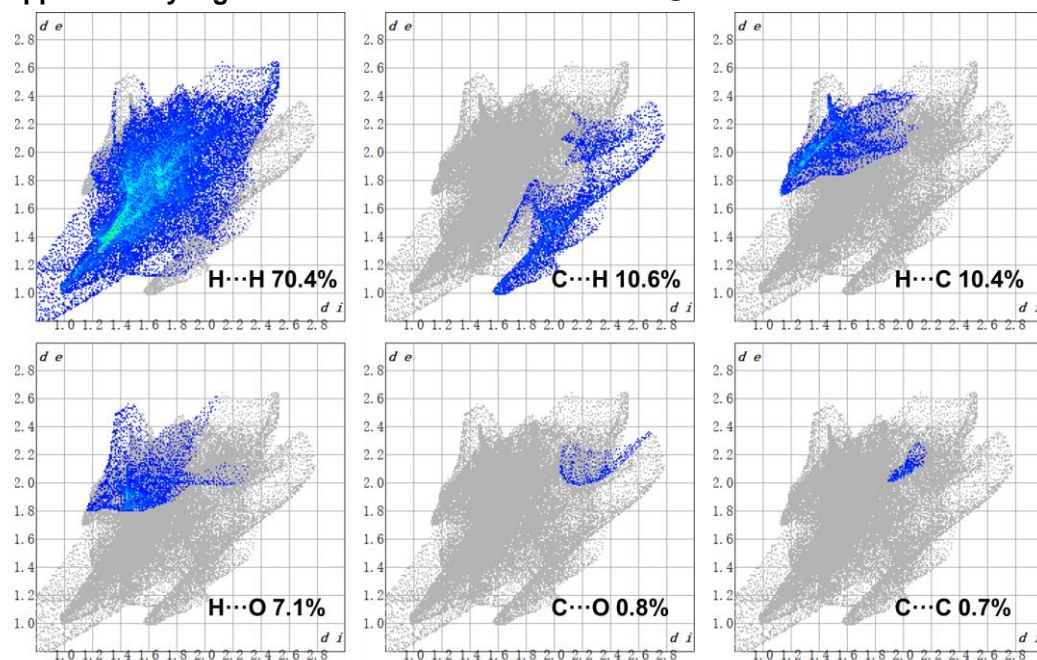

**Supplementary Fig. 52.** The 2D Hirshfeld fingerprint plots of **SAIOC-1@G6**.

#### 4.7 Host-guest chemistry of SAIOC-1@G7.

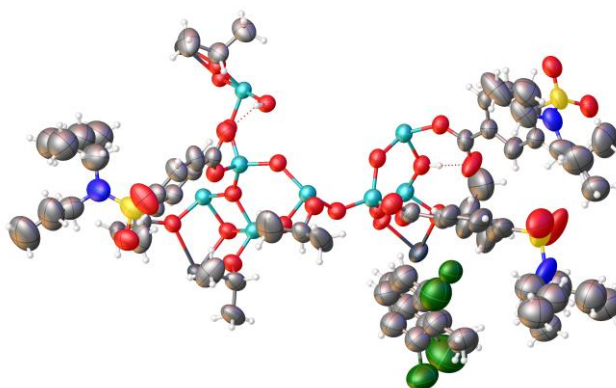

**Supplementary Fig. 53.** ORTEP diagrams (Thermal ellipsoids displayed at 50% probability) of the asymmetric unit of **SAIOC-1@G7**.

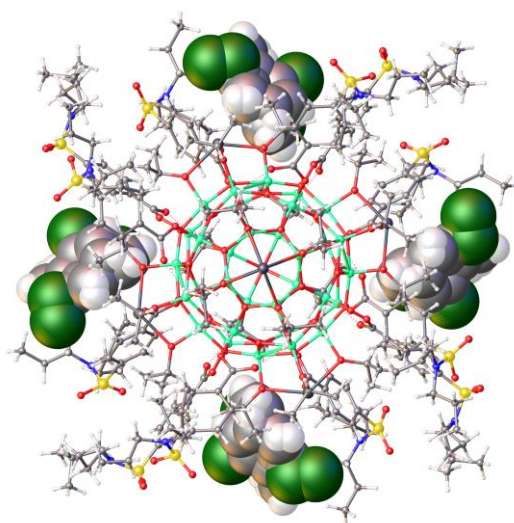

**Supplementary Fig. 54.** Molecular structure of **SAIOC-1@G7**.

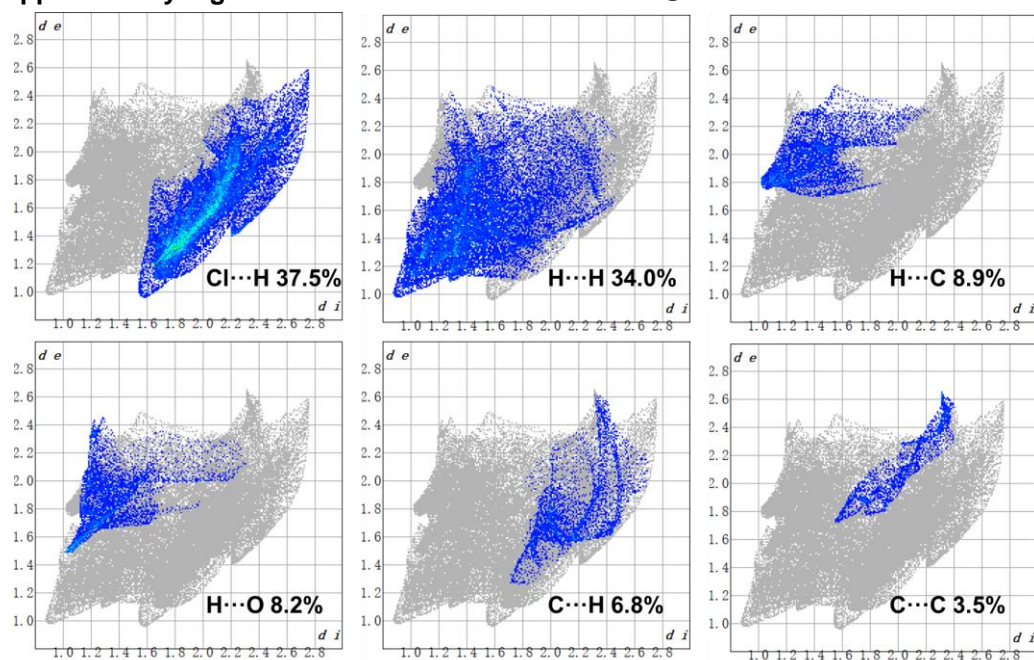

**Supplementary Fig. 55.** The 2D Hirshfeld fingerprint plots of **SAIOC-1@G7**.



#### 4.8 Host-guest chemistry of SAIOC-1@G8.

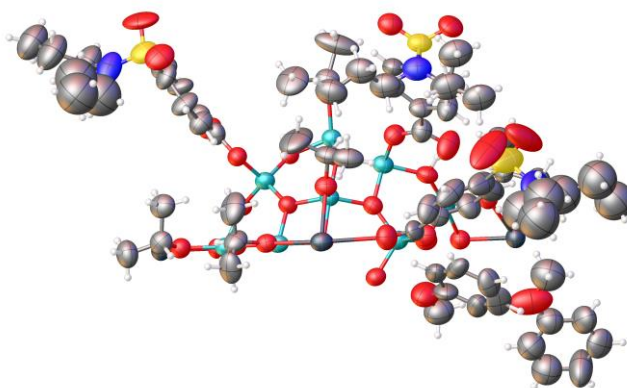

**Supplementary Fig. 56.** ORTEP diagrams (Thermal ellipsoids displayed at 50% probability) of the asymmetric unit of **SAIOC-1@G8**.

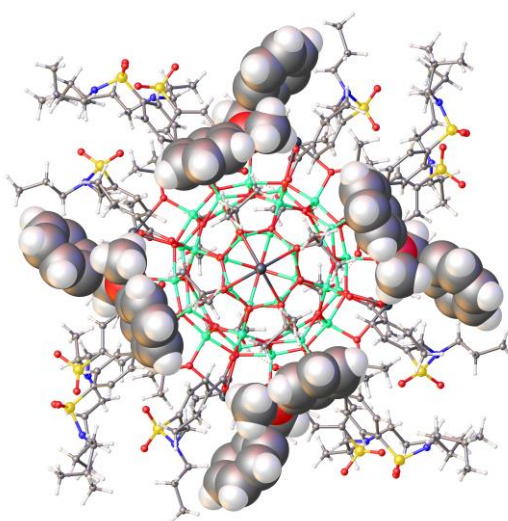

**Supplementary Fig. 57.** Molecular structure of **SAIOC-1@G8**.

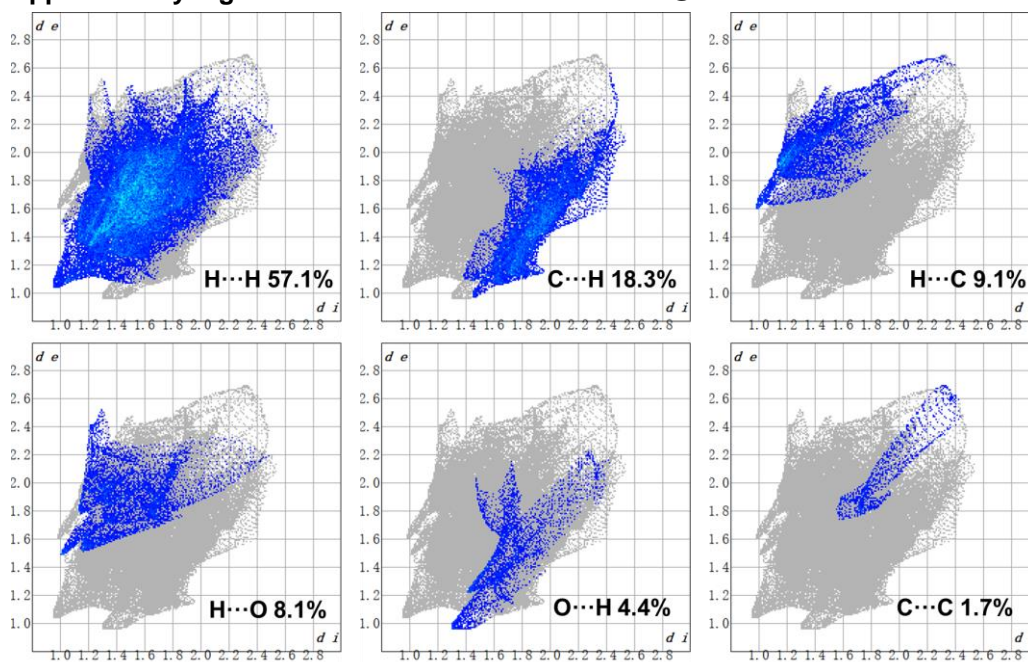

**Supplementary Fig. 58.** The 2D Hirshfeld fingerprint plots of **SAIOC-1@G8**.

#### 4.9 Host-guest chemistry of SAIOC-1@G9.

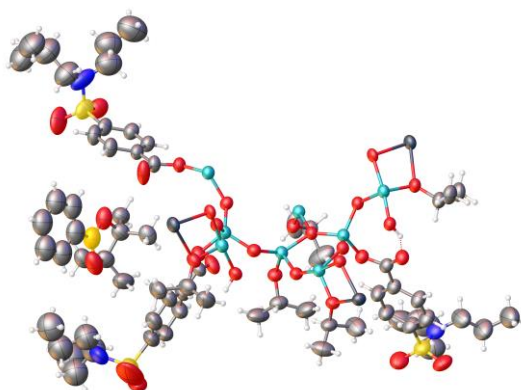

**Supplementary Fig. 59.** ORTEP diagrams (Thermal ellipsoids displayed at 50% probability) of the asymmetric unit of **SAIOC-1@G9**.

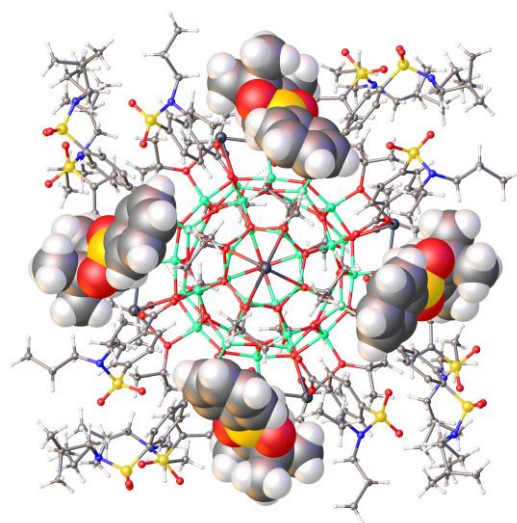

**Supplementary Fig. 60.** Molecular structure of **SAIOC-1@G9**.

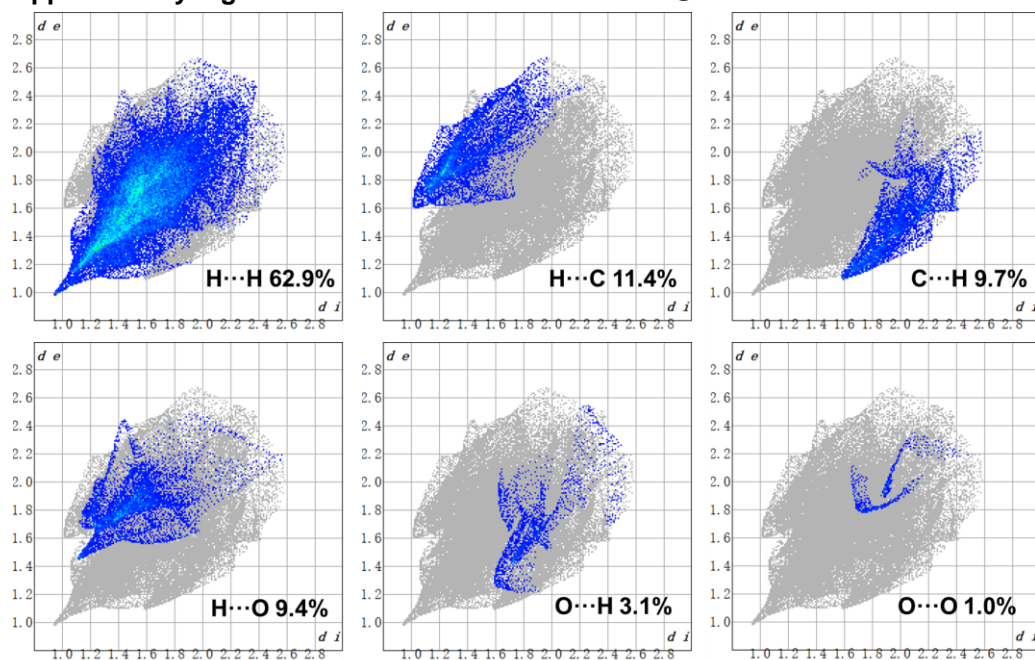

**Supplementary Fig. 61.** The 2D Hirshfeld fingerprint plots of **SAIOC-1@G9**.

#### 4.10 Host-guest chemistry of SAIOC-1@G10.

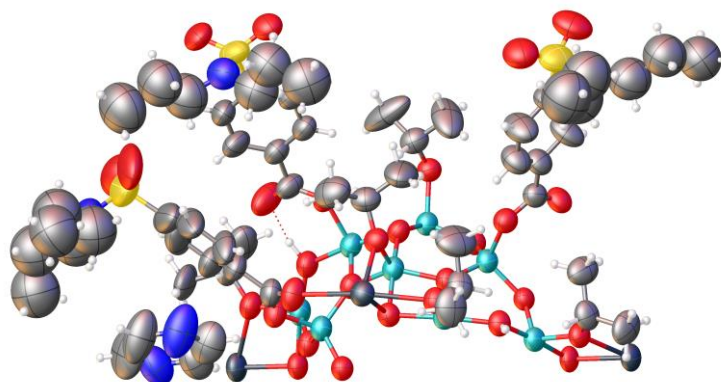

**Supplementary Fig. 62.** ORTEP diagrams (Thermal ellipsoids displayed at 50% probability) of the asymmetric unit of **SAIOC-1@G10**.

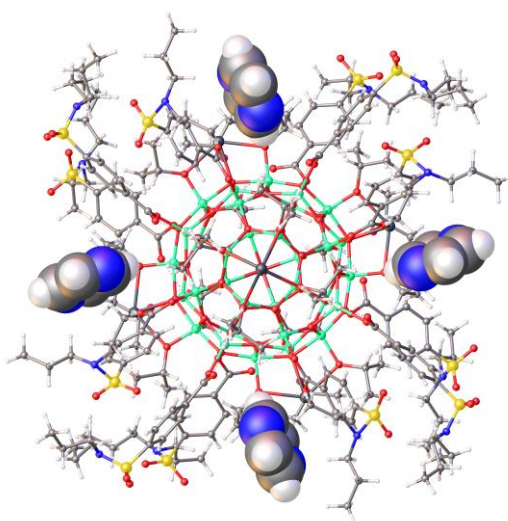

**Supplementary Fig. 63.** Molecular structure of **SAIOC-1@G10**.

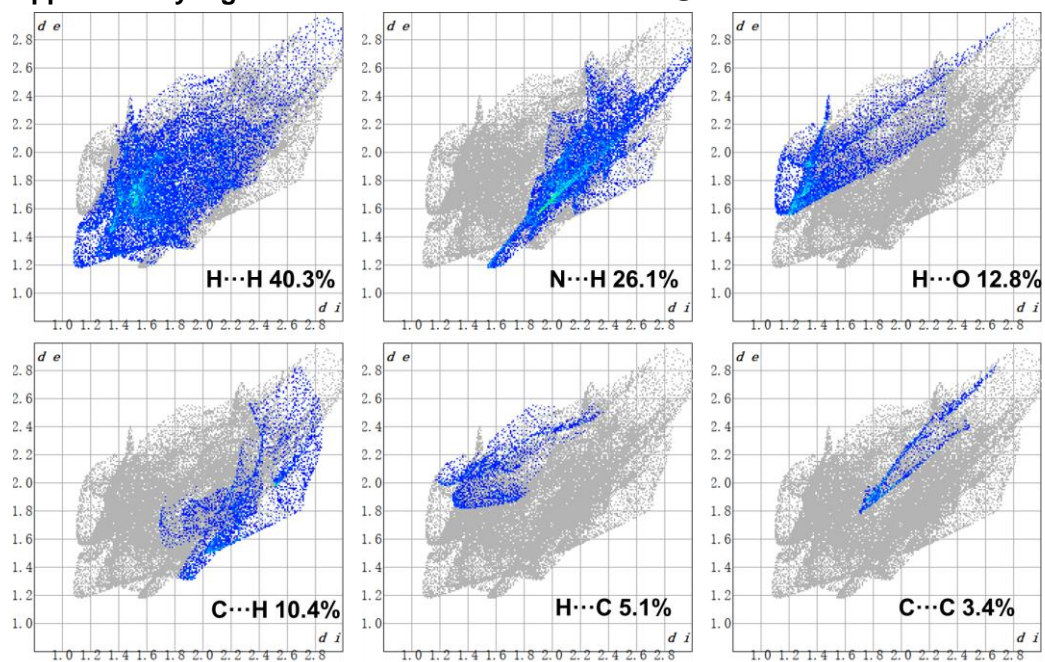

**Supplementary Fig. 64.** The 2D Hirshfeld fingerprint plots of **SAIOC-1@G10**.



#### 4.11 Host-guest chemistry of SAIOC-1@G11.

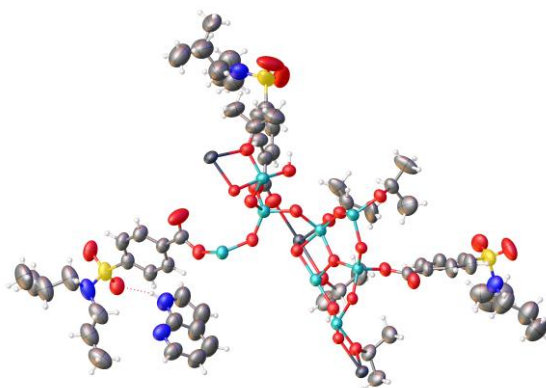

**Supplementary Fig. 65.** ORTEP diagrams (Thermal ellipsoids displayed at 50% probability) of the asymmetric unit of **SAIOC-1@G11**.

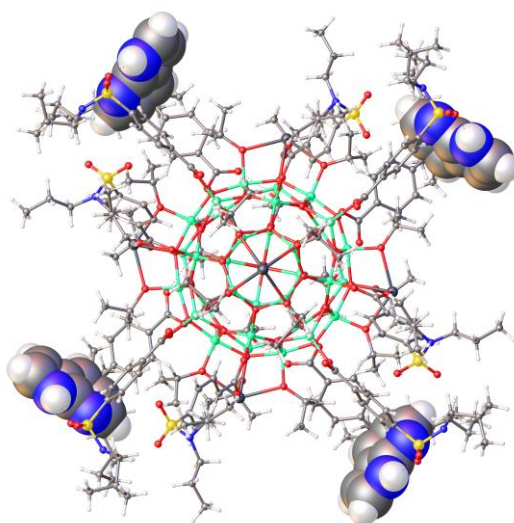

**Supplementary Fig. 66.** Molecular structure of **SAIOC-1@G11**.

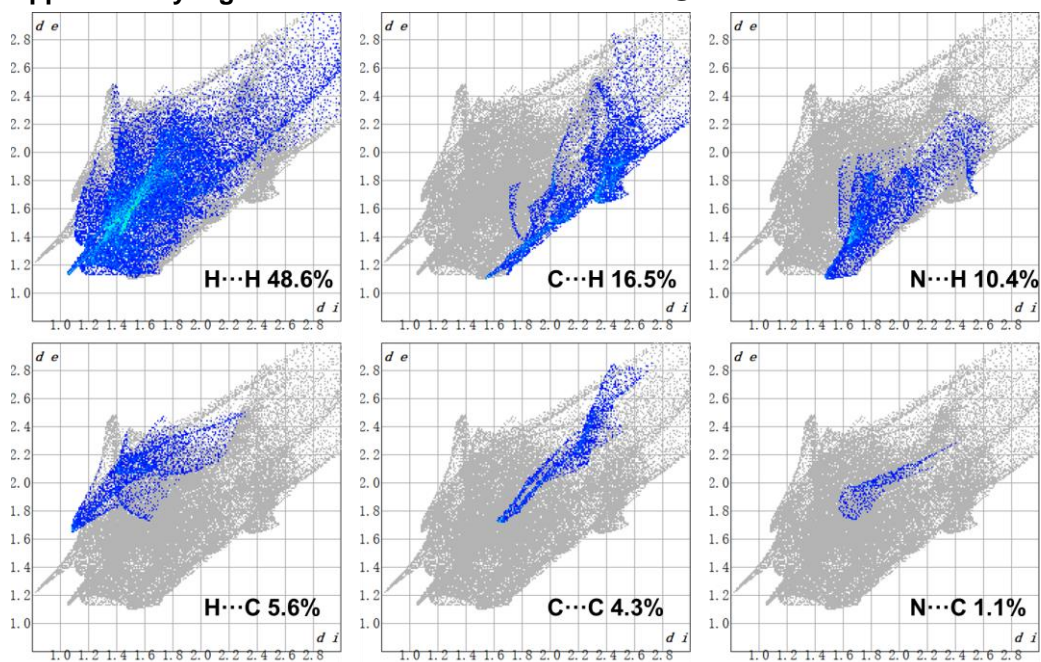

**Supplementary Fig. 67.** The 2D Hirshfeld fingerprint plots of **SAIOC-1@G11**.

#### 4.12 Host-guest chemistry of SAIOC-1@G12.

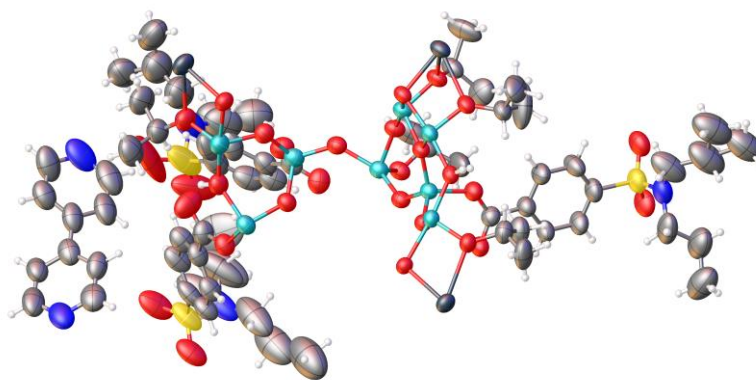

**Supplementary Fig. 68.** ORTEP diagrams (Thermal ellipsoids displayed at 50% probability) of the asymmetric unit of **SAIOC-1@G12**.

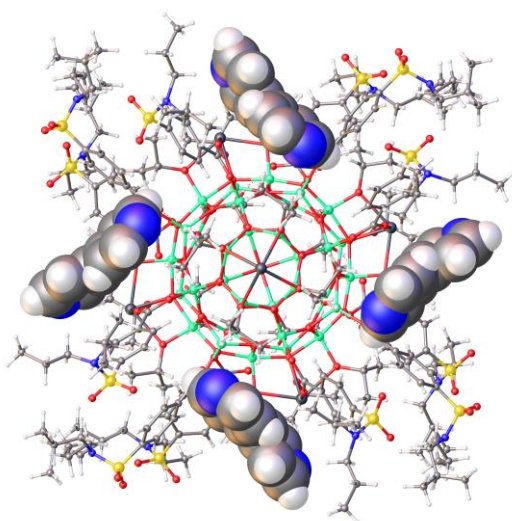

**Supplementary Fig. 69.** Molecular structure of **SAIOC-1@G12**.

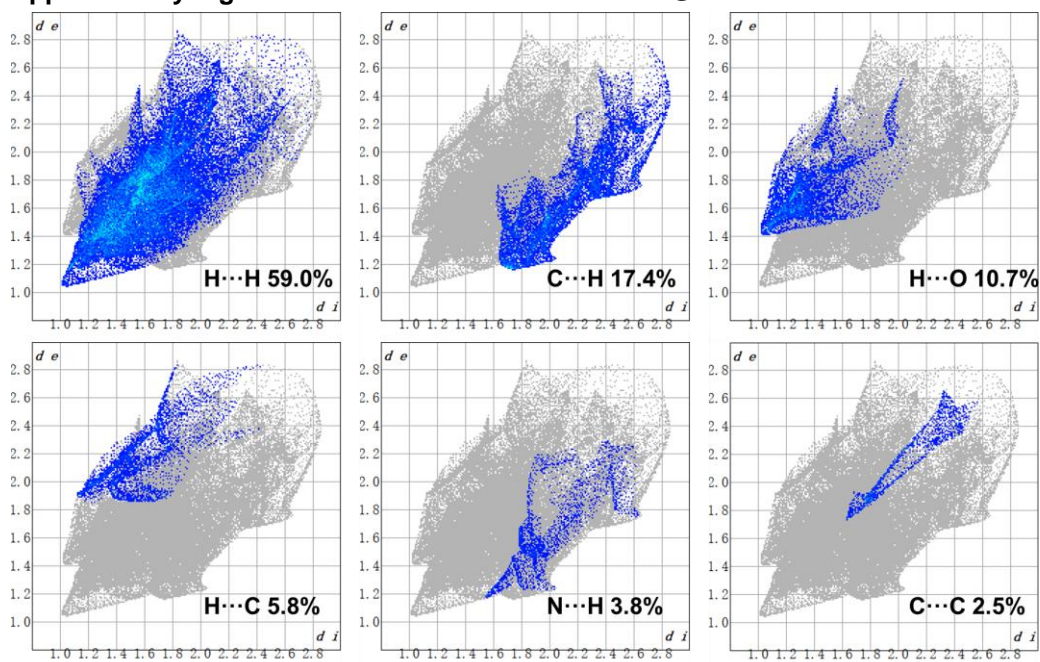

**Supplementary Fig. 70.** The 2D Hirshfeld fingerprint plots of **SAIOC-1@G12**.

#### 4.13 Host-guest chemistry of SAIOC-1@G13.

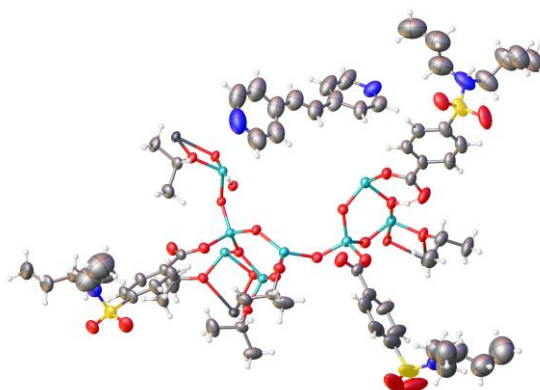

**Supplementary Fig. 71.** ORTEP diagrams (Thermal ellipsoids displayed at 50% probability) of the asymmetric unit of **SAIOC-1@G13**.

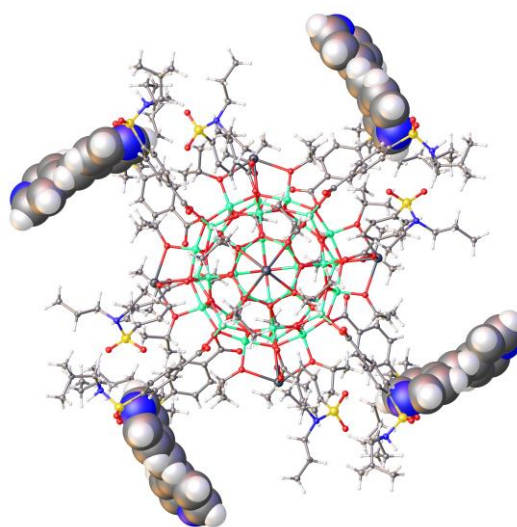

**Supplementary Fig. 72.** Molecular structure of **SAIOC-1@G13**.

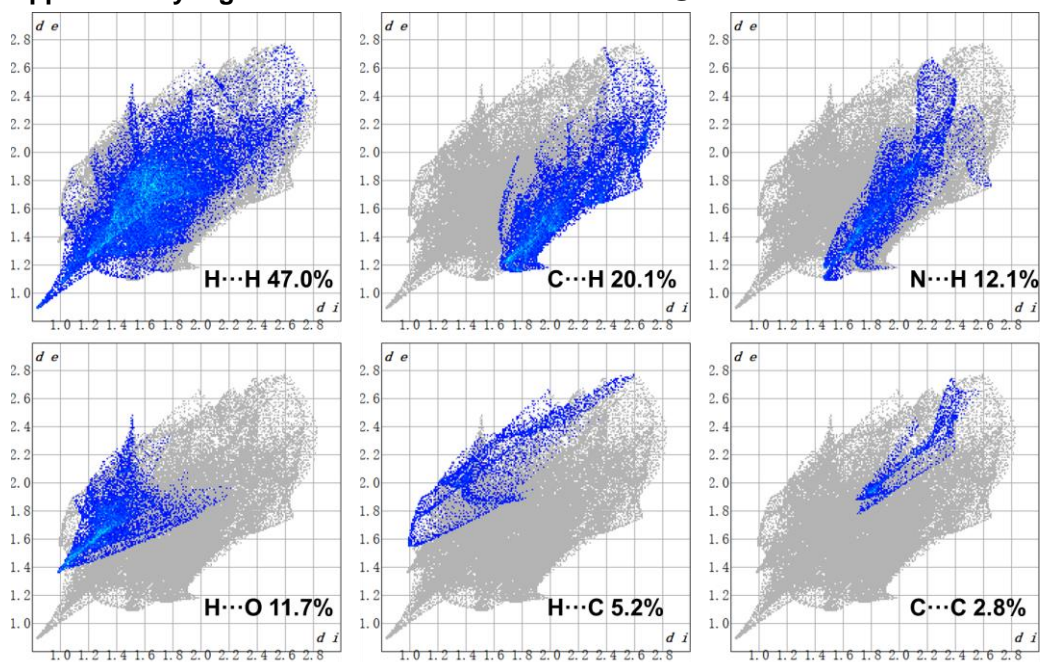

**Supplementary Fig. 73.** The 2D Hirshfeld fingerprint plots of **SAIOC-1@G13**.



#### 4.14 Host-guest chemistry of SAIOC-1@G14.

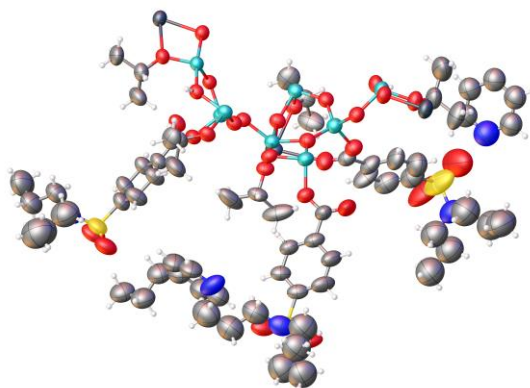

**Supplementary Fig. 74.** ORTEP diagrams (Thermal ellipsoids displayed at 50% probability) of the asymmetric unit of **SAIOC-1@G14**.

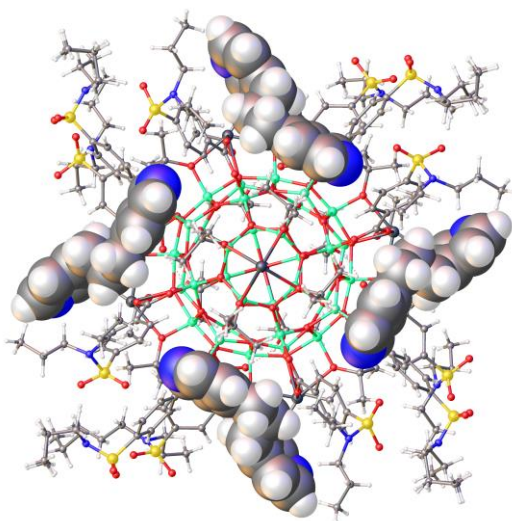

**Supplementary Fig. 75.** Molecular structure of **SAIOC-1@G14**.

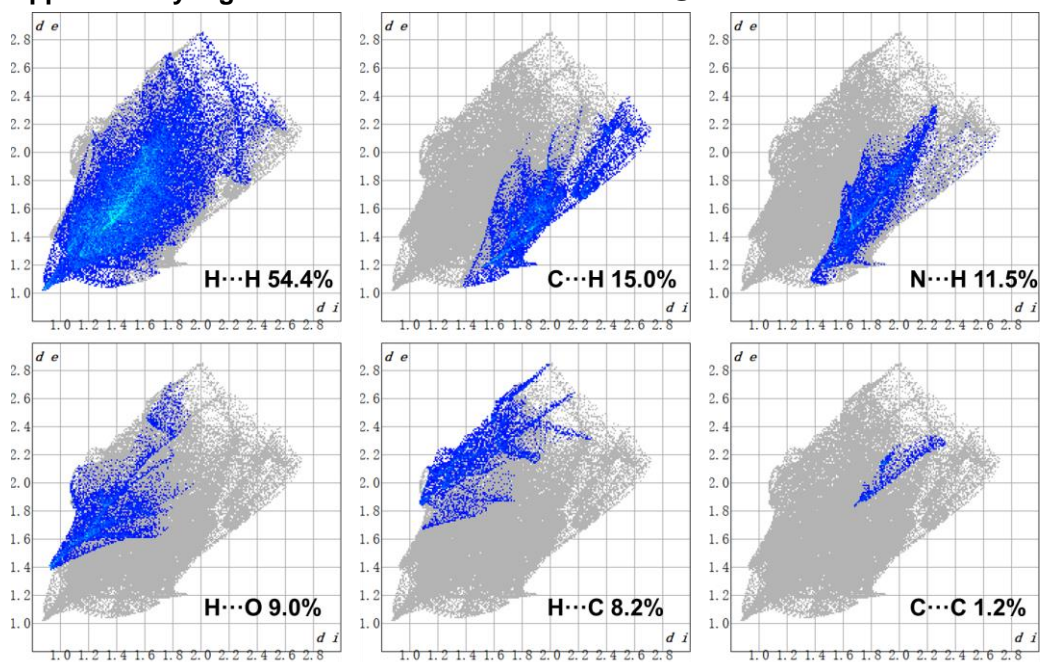

**Supplementary Fig. 76.** The 2D Hirshfeld fingerprint plots of **SAIOC-1@G14**.

#### 4.15 Crystal structures of guest molecules.

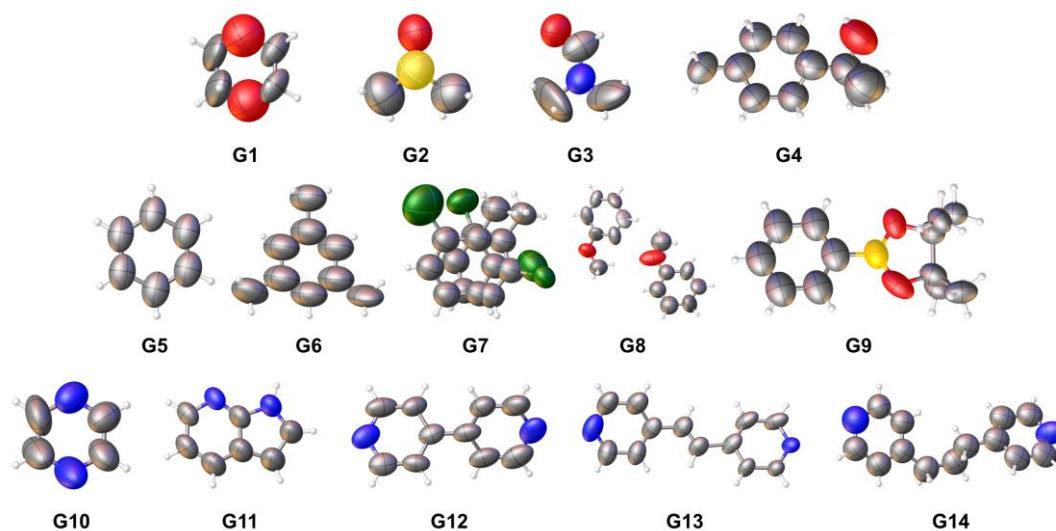

**Supplementary Fig. 77.** ORTEP diagrams (Thermal ellipsoids displayed at 50% probability) of guest molecules in **SAIOC-1@Guests**.

#### 4.16 Schematic diagram of surface guest engineering.

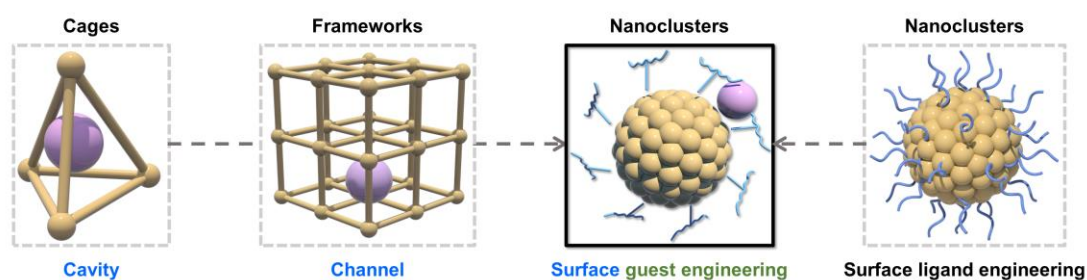

**Supplementary Fig. 78.** Compared with the classic framework or cage structure that relies on internal cavities or channels to accommodate guests, this work is inspired by nanoparticle surface ligand engineering and achieves the precise binding and modification of guest molecules on the surface of nanoclusters.



#### 4.17 Selectivity of SAIOC-1 for different guests.

After immersing the crystals in a mixture of benzene and cyclohexane for 24 hours, only benzene molecules could be observed in the single crystal structure (**SAIOC-1@G5**). Considering the extremely large molecular weight of the host cluster (7380.6055), the 10 mg crystals we put in are expected to absorb only 0.25  $\mu\text{l}$  of benzene (based on a host-guest ratio of 1:4, guest occupancy of 50%). This trace result can be observed to a certain extent through  $^1\text{H}$ -NMR spectra, but it is difficult to further quantify.

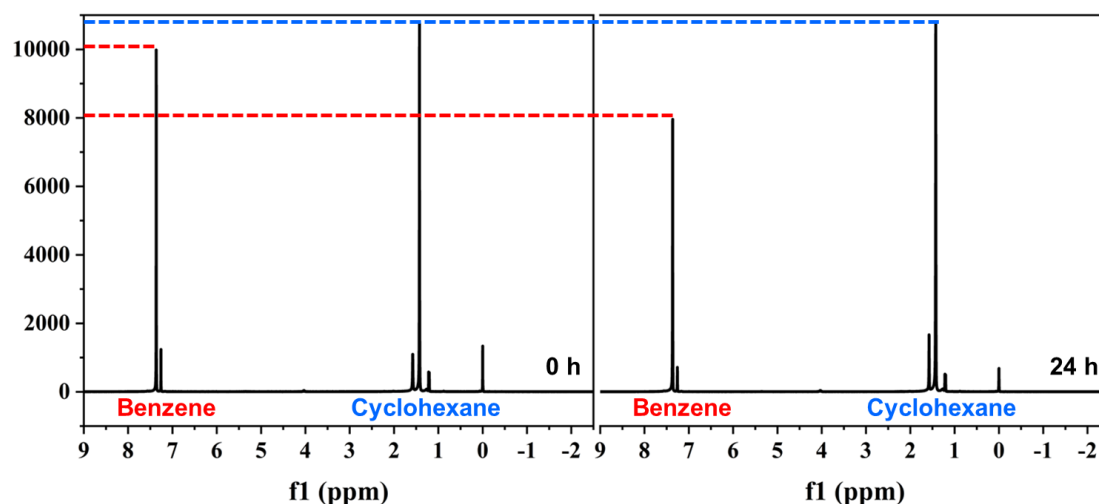

**Supplementary Fig. 79.** The  $^1\text{H}$ -NMR spectra of a mixture of benzene and cyclohexane before and after soaking the crystals.

#### 4.18 Guest release and recyclability of SAIOC-1.

We soaked **SAIOC-1@G10** in isopropanol for one week and then recorded it. Without the *squeeze* operation, no Q peak corresponding to the aromatic ring on the same position was observed in **SAIOC-1-recover**.

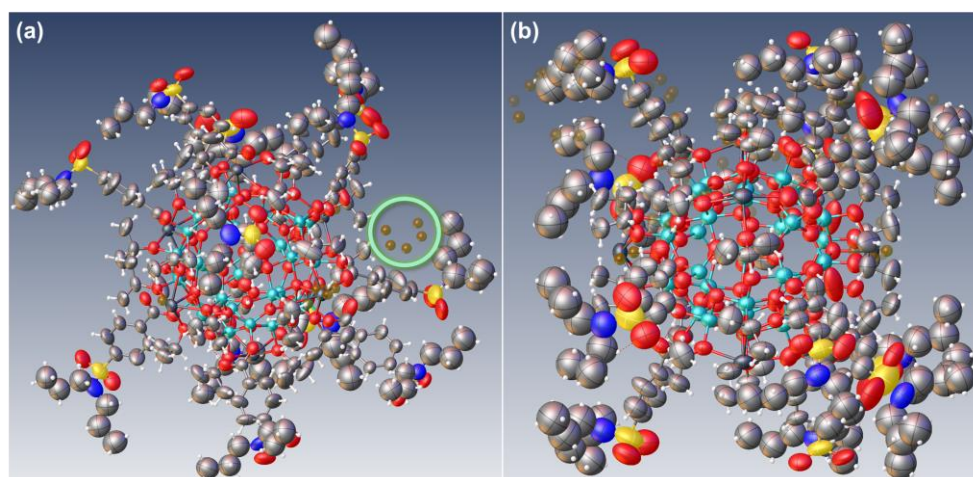

**Supplementary Fig. 80.** (a) Q peaks of **SAIOC-1@G10** after *squeeze* operation (the green circle is pyrazine). (b) Q peaks of **SAIOC-1-recover** before *squeeze* operation.

## 5. Crystallographic data, BVS analysis and hydrogen bond parameters.

**Table S1.** Crystallographic data and structure refinement parameters for **Al<sub>12</sub>Pb<sub>2</sub>**, **Al<sub>12</sub>Pb<sub>4</sub>** and **SAIOC-1**.

|                                                                                      | <b>Al<sub>12</sub>Pb<sub>2</sub></b>                                              | <b>Al<sub>12</sub>Pb<sub>4</sub></b>                                                             | <b>SAIOC-1</b>                                                                                                      |
|--------------------------------------------------------------------------------------|-----------------------------------------------------------------------------------|--------------------------------------------------------------------------------------------------|---------------------------------------------------------------------------------------------------------------------|
| Empirical formula                                                                    | C <sub>66</sub> H <sub>154</sub> Al <sub>12</sub> O <sub>32</sub> Pb <sub>2</sub> | C <sub>72</sub> H <sub>102</sub> Al <sub>12</sub> N <sub>2</sub> O <sub>42</sub> Pb <sub>4</sub> | C <sub>216</sub> H <sub>364</sub> Al <sub>32</sub> N <sub>12</sub> O <sub>110</sub> Pb <sub>6</sub> S <sub>12</sub> |
| Formula weight                                                                       | 2198.02                                                                           | 2820.07                                                                                          | 7380.39                                                                                                             |
| Temperature / K                                                                      | 99.99(10)                                                                         | 100.00(10)                                                                                       | 100.01(13)                                                                                                          |
| Crystal system                                                                       | monoclinic                                                                        | monoclinic                                                                                       | tetragonal                                                                                                          |
| Space group                                                                          | <i>C2/c</i>                                                                       | <i>C2/c</i>                                                                                      | <i>P4/n</i>                                                                                                         |
| <i>a</i> [Å]                                                                         | 33.9551(3)                                                                        | 23.5670(2)                                                                                       | 29.8347(2)                                                                                                          |
| <i>b</i> [Å]                                                                         | 12.10050(10)                                                                      | 18.75520(10)                                                                                     | 29.8347(2)                                                                                                          |
| <i>c</i> [Å]                                                                         | 24.8428(3)                                                                        | 24.73990(10)                                                                                     | 19.4324(3)                                                                                                          |
| $\alpha$ [°]                                                                         | 90                                                                                | 90                                                                                               | 90                                                                                                                  |
| $\beta$ [°]                                                                          | 93.2340(10)                                                                       | 107.2350(10)                                                                                     | 90                                                                                                                  |
| $\gamma$ [°]                                                                         | 90                                                                                | 90                                                                                               | 90                                                                                                                  |
| <i>V</i> [Å <sup>3</sup> ]                                                           | 10191.00(17)                                                                      | 10444.12(13)                                                                                     | 17297.0(4)                                                                                                          |
| <i>Z</i>                                                                             | 4                                                                                 | 4                                                                                                | 2                                                                                                                   |
| $\rho_{\text{calcd}}$ [g cm <sup>-3</sup> ]                                          | 1.433                                                                             | 1.793                                                                                            | 1.417                                                                                                               |
| $\mu$ [mm <sup>-1</sup> ]                                                            | 5.455                                                                             | 9.355                                                                                            | 5.261                                                                                                               |
| <i>F</i> (000)                                                                       | 4504.0                                                                            | 5472.0                                                                                           | 7448.0                                                                                                              |
| Index ranges                                                                         | $-39 \leq h \leq 39$                                                              | $-27 \leq h \leq 27$                                                                             | $-28 \leq h \leq 35$                                                                                                |
|                                                                                      | $-14 \leq k \leq 14$                                                              | $-22 \leq k \leq 22$                                                                             | $-35 \leq k \leq 31$                                                                                                |
|                                                                                      | $-29 \leq l \leq 29$                                                              | $-22 \leq l \leq 29$                                                                             | $-23 \leq l \leq 22$                                                                                                |
| Reflections collected                                                                | 89276                                                                             | 48446                                                                                            | 198860                                                                                                              |
| Independent reflections                                                              | 8698 [ <i>R</i> <sub>int</sub> = 0.1144]                                          | 8884 [ <i>R</i> <sub>int</sub> = 0.0292]                                                         | 15220 [ <i>R</i> <sub>int</sub> = 0.0865]                                                                           |
| data/restraints/parameters                                                           | 8698/287/527                                                                      | 8884/314/632                                                                                     | 15220/429/855                                                                                                       |
| Goodness-of-fit on <i>F</i> <sup>2</sup>                                             | 1.048                                                                             | 1.027                                                                                            | 1.042                                                                                                               |
| <i>R</i> <sub>1</sub> , <i>wR</i> <sub>2</sub> [ <i>I</i> > 2 $\sigma$ ( <i>I</i> )] | 0.1005, 0.2457                                                                    | 0.0332, 0.0826                                                                                   | 0.0667, 0.1958                                                                                                      |
| <i>R</i> <sub>1</sub> , <i>wR</i> <sub>2</sub> [all data]                            | 0.1031, 0.2477                                                                    | 0.0341, 0.0832                                                                                   | 0.0772, 0.2078                                                                                                      |
| Largest diff. Peak/hole/e Å <sup>-3</sup>                                            | 9.84/-4.21                                                                        | 2.98/-1.73                                                                                       | 2.23/-0.81                                                                                                          |

**Table S2.** Crystallographic data and structure refinement parameters for **SAIOC-1@G1** and **SAIOC-1@G2**.

|                                                                             | <b>SAIOC-1@G1</b>                                                                                                   | <b>SAIOC-1@G2</b>                                                                                                   |
|-----------------------------------------------------------------------------|---------------------------------------------------------------------------------------------------------------------|---------------------------------------------------------------------------------------------------------------------|
| Empirical formula                                                           | C <sub>228</sub> H <sub>388</sub> Al <sub>32</sub> N <sub>12</sub> O <sub>116</sub> Pb <sub>6</sub> S <sub>12</sub> | C <sub>222</sub> H <sub>382</sub> Al <sub>32</sub> N <sub>12</sub> O <sub>113</sub> Pb <sub>6</sub> S <sub>15</sub> |
| Formula weight                                                              | 7644.70                                                                                                             | 7614.77                                                                                                             |
| Temperature / K                                                             | 99.97(10)                                                                                                           | 99.99(10)                                                                                                           |
| Crystal system                                                              | tetragonal                                                                                                          | tetragonal                                                                                                          |
| Space group                                                                 | <i>P4/n</i>                                                                                                         | <i>P4/n</i>                                                                                                         |
| <i>a</i> [Å]                                                                | 29.9874(5)                                                                                                          | 29.8617(5)                                                                                                          |
| <i>b</i> [Å]                                                                | 29.9874(5)                                                                                                          | 29.8617(5)                                                                                                          |
| <i>c</i> [Å]                                                                | 19.1527(6)                                                                                                          | 19.1914(5)                                                                                                          |
| $\alpha$ [°]                                                                | 90                                                                                                                  | 90                                                                                                                  |
| $\beta$ [°]                                                                 | 90                                                                                                                  | 90                                                                                                                  |
| $\gamma$ [°]                                                                | 90                                                                                                                  | 90                                                                                                                  |
| <i>V</i> [Å <sup>3</sup> ]                                                  | 17223.0(8)                                                                                                          | 17113.4(7)                                                                                                          |
| <i>Z</i>                                                                    | 2                                                                                                                   | 2                                                                                                                   |
| $\rho_{\text{calcd}}$ [g cm <sup>-3</sup> ]                                 | 1.474                                                                                                               | 1.478                                                                                                               |
| $\mu$ [mm <sup>-1</sup> ]                                                   | 5.305                                                                                                               | 5.442                                                                                                               |
| <i>F</i> (000)                                                              | 7736.0                                                                                                              | 7700.0                                                                                                              |
| Index ranges                                                                | −35 ≤ <i>h</i> ≤ 34                                                                                                 | −35 ≤ <i>h</i> ≤ 27                                                                                                 |
|                                                                             | −19 ≤ <i>k</i> ≤ 35                                                                                                 | −31 ≤ <i>k</i> ≤ 34                                                                                                 |
|                                                                             | −22 ≤ <i>l</i> ≤ 22                                                                                                 | −12 ≤ <i>l</i> ≤ 22                                                                                                 |
| Reflections collected                                                       | 48533                                                                                                               | 54616                                                                                                               |
| Independent reflections                                                     | 14441 [ <i>R</i> <sub>int</sub> = 0.0745]                                                                           | 14557 [ <i>R</i> <sub>int</sub> = 0.0496]                                                                           |
| data/restraints/parameters                                                  | 14441/500/916                                                                                                       | 14557/512/899                                                                                                       |
| Goodness-of-fit on <i>F</i> <sup>2</sup>                                    | 1.047                                                                                                               | 1.042                                                                                                               |
| <i>R</i> <sub>1</sub> , <i>wR</i> <sub>2</sub> [ <i>I</i> > 2σ( <i>I</i> )] | 0.1275, 0.2844                                                                                                      | 0.0860, 0.2500                                                                                                      |
| <i>R</i> <sub>1</sub> , <i>wR</i> <sub>2</sub> [all data]                   | 0.2059, 0.3416                                                                                                      | 0.1174, 0.2836                                                                                                      |
| Largest diff. Peak/hole/e Å <sup>-3</sup>                                   | 1.72/-0.61                                                                                                          | 1.85/-0.77                                                                                                          |

**Table S3.** Crystallographic data and structure refinement parameters for **SAIOC-1@G3** and **SAIOC-1@G4**.

|                                                                                      | <b>SAIOC-1@G3</b>                                                                                                   | <b>SAIOC-1@G4</b>                                                                                                   |
|--------------------------------------------------------------------------------------|---------------------------------------------------------------------------------------------------------------------|---------------------------------------------------------------------------------------------------------------------|
| Empirical formula                                                                    | C <sub>228</sub> H <sub>392</sub> Al <sub>32</sub> N <sub>16</sub> O <sub>114</sub> Pb <sub>6</sub> S <sub>12</sub> | C <sub>246</sub> H <sub>416</sub> Al <sub>32</sub> N <sub>12</sub> O <sub>113</sub> Pb <sub>6</sub> S <sub>12</sub> |
| Formula weight                                                                       | 7672.77                                                                                                             | 7841.10                                                                                                             |
| Temperature / K                                                                      | 100.01(11)                                                                                                          | 99.97(10)                                                                                                           |
| Crystal system                                                                       | tetragonal                                                                                                          | tetragonal                                                                                                          |
| Space group                                                                          | <i>P4/n</i>                                                                                                         | <i>P4/n</i>                                                                                                         |
| <i>a</i> [Å]                                                                         | 29.9222(4)                                                                                                          | 30.0800(2)                                                                                                          |
| <i>b</i> [Å]                                                                         | 29.9222(4)                                                                                                          | 30.0800(2)                                                                                                          |
| <i>c</i> [Å]                                                                         | 19.3494(4)                                                                                                          | 19.6522(2)                                                                                                          |
| $\alpha$ [°]                                                                         | 90                                                                                                                  | 90                                                                                                                  |
| $\beta$ [°]                                                                          | 90                                                                                                                  | 90                                                                                                                  |
| $\gamma$ [°]                                                                         | 90                                                                                                                  | 90                                                                                                                  |
| <i>V</i> [Å <sup>3</sup> ]                                                           | 17324.3(6)                                                                                                          | 17781.4(3)                                                                                                          |
| <i>Z</i>                                                                             | 2                                                                                                                   | 2                                                                                                                   |
| $\rho_{\text{calcd}}$ [g cm <sup>-3</sup> ]                                          | 1.471                                                                                                               | 1.465                                                                                                               |
| $\mu$ [mm <sup>-1</sup> ]                                                            | 5.275                                                                                                               | 5.144                                                                                                               |
| <i>F</i> (000)                                                                       | 7768.0                                                                                                              | 7960.0                                                                                                              |
| Index ranges                                                                         | $-34 \leq h \leq 35$                                                                                                | $-35 \leq h \leq 19$                                                                                                |
|                                                                                      | $-21 \leq k \leq 33$                                                                                                | $-33 \leq k \leq 18$                                                                                                |
|                                                                                      | $-22 \leq l \leq 22$                                                                                                | $-11 \leq l \leq 23$                                                                                                |
| Reflections collected                                                                | 51508                                                                                                               | 50077                                                                                                               |
| Independent reflections                                                              | 14729 [ <i>R</i> <sub>int</sub> = 0.0430]                                                                           | 15118 [ <i>R</i> <sub>int</sub> = 0.0367]                                                                           |
| data/restraints/parameters                                                           | 14729/281/916                                                                                                       | 15118/469/976                                                                                                       |
| Goodness-of-fit on <i>F</i> <sup>2</sup>                                             | 1.016                                                                                                               | 1.025                                                                                                               |
| <i>R</i> <sub>1</sub> , <i>wR</i> <sub>2</sub> [ <i>I</i> > 2 $\sigma$ ( <i>I</i> )] | 0.0803, 0.2271                                                                                                      | 0.0481, 0.1314                                                                                                      |
| <i>R</i> <sub>1</sub> , <i>wR</i> <sub>2</sub> [all data]                            | 0.1042, 0.2521                                                                                                      | 0.0557, 0.1360                                                                                                      |
| Largest diff. Peak/hole/e<br>Å <sup>-3</sup>                                         | 2.72/-0.98                                                                                                          | 1.20/-0.71                                                                                                          |

**Table S4.** Crystallographic data and structure refinement parameters for **SAIOC-1@G5** and **SAIOC-1@G6**.

|                                                                             | <b>SAIOC-1@G5</b>                                                                                                   | <b>SAIOC-1@G6</b>                                                                                                   |
|-----------------------------------------------------------------------------|---------------------------------------------------------------------------------------------------------------------|---------------------------------------------------------------------------------------------------------------------|
| Empirical formula                                                           | C <sub>228</sub> H <sub>372</sub> Al <sub>32</sub> N <sub>12</sub> O <sub>110</sub> Pb <sub>6</sub> S <sub>12</sub> | C <sub>243</sub> H <sub>394</sub> Al <sub>32</sub> N <sub>12</sub> O <sub>110</sub> Pb <sub>6</sub> S <sub>12</sub> |
| Formula weight                                                              | 7532.57                                                                                                             | 7734.90                                                                                                             |
| Temperature / K                                                             | 100.01(10)                                                                                                          | 100.00(13)                                                                                                          |
| Crystal system                                                              | tetragonal                                                                                                          | tetragonal                                                                                                          |
| Space group                                                                 | <i>P4/n</i>                                                                                                         | <i>P4/n</i>                                                                                                         |
| <i>a</i> [Å]                                                                | 30.0020(4)                                                                                                          | 30.0301(3)                                                                                                          |
| <i>b</i> [Å]                                                                | 30.0020(4)                                                                                                          | 30.0301(3)                                                                                                          |
| <i>c</i> [Å]                                                                | 19.4409(4)                                                                                                          | 19.2959(4)                                                                                                          |
| $\alpha$ [°]                                                                | 90                                                                                                                  | 90                                                                                                                  |
| $\beta$ [°]                                                                 | 90                                                                                                                  | 90                                                                                                                  |
| $\gamma$ [°]                                                                | 90                                                                                                                  | 90                                                                                                                  |
| <i>V</i> [Å <sup>3</sup> ]                                                  | 17499.1(6)                                                                                                          | 17401.2(5)                                                                                                          |
| <i>Z</i>                                                                    | 2                                                                                                                   | 2                                                                                                                   |
| $\rho_{\text{calcd}}$ [g cm <sup>-3</sup> ]                                 | 1.430                                                                                                               | 1.476                                                                                                               |
| $\mu$ [mm <sup>-1</sup> ]                                                   | 5.208                                                                                                               | 5.248                                                                                                               |
| <i>F</i> (000)                                                              | 7608.0                                                                                                              | 7832.0                                                                                                              |
| Index ranges                                                                | −35 ≤ <i>h</i> ≤ 24                                                                                                 | −32 ≤ <i>h</i> ≤ 34                                                                                                 |
|                                                                             | −32 ≤ <i>k</i> ≤ 33                                                                                                 | −35 ≤ <i>k</i> ≤ 19                                                                                                 |
|                                                                             | −22 ≤ <i>l</i> ≤ 12                                                                                                 | −12 ≤ <i>l</i> ≤ 22                                                                                                 |
| Reflections collected                                                       | 49850                                                                                                               | 50716                                                                                                               |
| Independent reflections                                                     | 14877 [ <i>R</i> <sub>int</sub> = 0.0494]                                                                           | 14796 [ <i>R</i> <sub>int</sub> = 0.0463]                                                                           |
| data/restraints/parameters                                                  | 14877/581/928                                                                                                       | 14796/328/934                                                                                                       |
| Goodness-of-fit on <i>F</i> <sup>2</sup>                                    | 1.027                                                                                                               | 1.046                                                                                                               |
| <i>R</i> <sub>1</sub> , <i>wR</i> <sub>2</sub> [ <i>I</i> > 2σ( <i>I</i> )] | 0.0785, 0.2162                                                                                                      | 0.0635, 0.1864                                                                                                      |
| <i>R</i> <sub>1</sub> , <i>wR</i> <sub>2</sub> [all data]                   | 0.1013, 0.2421                                                                                                      | 0.0824, 0.2018                                                                                                      |
| Largest diff. Peak/hole/e Å <sup>-3</sup>                                   | 3.24/−0.67                                                                                                          | 1.95/−0.69                                                                                                          |

**Table S5.** Crystallographic data and structure refinement parameters for **SAIOC-1@G7** and **SAIOC-1@G8**.

|                                                                             | <b>SAIOC-1@G7</b>                                                                                                                   | <b>SAIOC-1@G8</b>                                                                                                   |
|-----------------------------------------------------------------------------|-------------------------------------------------------------------------------------------------------------------------------------|---------------------------------------------------------------------------------------------------------------------|
| Empirical formula                                                           | C <sub>244</sub> H <sub>388</sub> Al <sub>32</sub> Cl <sub>8</sub> N <sub>12</sub> O <sub>110</sub> Pb <sub>6</sub> S <sub>12</sub> | C <sub>251</sub> H <sub>402</sub> Al <sub>32</sub> N <sub>12</sub> O <sub>115</sub> Pb <sub>6</sub> S <sub>12</sub> |
| Formula weight                                                              | 8024.46                                                                                                                             | 7919.04                                                                                                             |
| Temperature / K                                                             | 99.99(10)                                                                                                                           | 113(6)                                                                                                              |
| Crystal system                                                              | tetragonal                                                                                                                          | tetragonal                                                                                                          |
| Space group                                                                 | <i>P4/n</i>                                                                                                                         | <i>P4/n</i>                                                                                                         |
| <i>a</i> [Å]                                                                | 30.0205(4)                                                                                                                          | 30.0958(6)                                                                                                          |
| <i>b</i> [Å]                                                                | 30.0205(4)                                                                                                                          | 30.0958(6)                                                                                                          |
| <i>c</i> [Å]                                                                | 19.1946(4)                                                                                                                          | 19.3547(5)                                                                                                          |
| $\alpha$ [°]                                                                | 90                                                                                                                                  | 90                                                                                                                  |
| $\beta$ [°]                                                                 | 90                                                                                                                                  | 90                                                                                                                  |
| $\gamma$ [°]                                                                | 90                                                                                                                                  | 90                                                                                                                  |
| <i>V</i> [Å <sup>3</sup> ]                                                  | 17298.8(6)                                                                                                                          | 17530.7(8)                                                                                                          |
| <i>Z</i>                                                                    | 2                                                                                                                                   | 2                                                                                                                   |
| $\rho_{\text{calcd}}$ [g cm <sup>-3</sup> ]                                 | 1.541                                                                                                                               | 1.500                                                                                                               |
| $\mu$ [mm <sup>-1</sup> ]                                                   | 5.657                                                                                                                               | 5.225                                                                                                               |
| <i>F</i> (000)                                                              | 8104.0                                                                                                                              | 8024.0                                                                                                              |
| Index ranges                                                                | −38 ≤ <i>h</i> ≤ 35                                                                                                                 | −34 ≤ <i>h</i> ≤ 29                                                                                                 |
|                                                                             | −24 ≤ <i>k</i> ≤ 36                                                                                                                 | −35 ≤ <i>k</i> ≤ 32                                                                                                 |
|                                                                             | −12 ≤ <i>l</i> ≤ 24                                                                                                                 | −22 ≤ <i>l</i> ≤ 12                                                                                                 |
| Reflections collected                                                       | 58348                                                                                                                               | 48186                                                                                                               |
| Independent reflections                                                     | 18951 [ <i>R</i> <sub>int</sub> = 0.0535]                                                                                           | 14853 [ <i>R</i> <sub>int</sub> = 0.0749]                                                                           |
| data/restraints/parameters                                                  | 18951/535/1042                                                                                                                      | 14853/224/985                                                                                                       |
| Goodness-of-fit on <i>F</i> <sup>2</sup>                                    | 0.988                                                                                                                               | 1.077                                                                                                               |
| <i>R</i> <sub>1</sub> , <i>wR</i> <sub>2</sub> [ <i>I</i> > 2σ( <i>I</i> )] | 0.0755, 0.2092                                                                                                                      | 0.1076, 0.2726                                                                                                      |
| <i>R</i> <sub>1</sub> , <i>wR</i> <sub>2</sub> [all data]                   | 0.1107, 0.2420                                                                                                                      | 0.1634, 0.3415                                                                                                      |
| Largest diff. Peak/hole/e Å <sup>-3</sup>                                   | 2.52/−0.86                                                                                                                          | 3.59/−0.99                                                                                                          |

**Table S6.** Crystallographic data and structure refinement parameters for **SAIOC-1 @G9** and **SAIOC-1 @G10**.

|                                                                             | <b>SAIOC-1 @G9</b>                                                                                                                 | <b>SAIOC-1 @G10</b>                                                                                                 |
|-----------------------------------------------------------------------------|------------------------------------------------------------------------------------------------------------------------------------|---------------------------------------------------------------------------------------------------------------------|
| Empirical formula                                                           | C <sub>252</sub> H <sub>413</sub> Al <sub>32</sub> B <sub>3</sub> N <sub>12</sub> O <sub>116</sub> Pb <sub>6</sub> S <sub>12</sub> | C <sub>227</sub> H <sub>374</sub> Al <sub>32</sub> N <sub>18</sub> O <sub>110</sub> Pb <sub>6</sub> S <sub>12</sub> |
| Formula weight                                                              | 7990.57                                                                                                                            | 7606.64                                                                                                             |
| Temperature / K                                                             | 100.00(10)                                                                                                                         | 100.00(10)                                                                                                          |
| Crystal system                                                              | tetragonal                                                                                                                         | tetragonal                                                                                                          |
| Space group                                                                 | <i>P4/n</i>                                                                                                                        | <i>P4/n</i>                                                                                                         |
| <i>a</i> [Å]                                                                | 30.3099(3)                                                                                                                         | 29.8642(5)                                                                                                          |
| <i>b</i> [Å]                                                                | 30.3099(3)                                                                                                                         | 29.8642(5)                                                                                                          |
| <i>c</i> [Å]                                                                | 19.6250(3)                                                                                                                         | 19.3935(4)                                                                                                          |
| $\alpha$ [°]                                                                | 90                                                                                                                                 | 90                                                                                                                  |
| $\beta$ [°]                                                                 | 90                                                                                                                                 | 90                                                                                                                  |
| $\gamma$ [°]                                                                | 90                                                                                                                                 | 90                                                                                                                  |
| <i>V</i> [Å <sup>3</sup> ]                                                  | 18029.3(5)                                                                                                                         | 17296.5(7)                                                                                                          |
| <i>Z</i>                                                                    | 2                                                                                                                                  | 2                                                                                                                   |
| $\rho_{\text{calcd}}$ [g cm <sup>-3</sup> ]                                 | 1.472                                                                                                                              | 1.461                                                                                                               |
| $\mu$ [mm <sup>-1</sup> ]                                                   | 5.085                                                                                                                              | 5.276                                                                                                               |
| <i>F</i> (000)                                                              | 8104.0                                                                                                                             | 7684.0                                                                                                              |
| Index ranges                                                                | −39 ≤ <i>h</i> ≤ 33                                                                                                                | −35 ≤ <i>h</i> ≤ 34                                                                                                 |
|                                                                             | −39 ≤ <i>k</i> ≤ 35                                                                                                                | −32 ≤ <i>k</i> ≤ 33                                                                                                 |
|                                                                             | −25 ≤ <i>l</i> ≤ 24                                                                                                                | −22 ≤ <i>l</i> ≤ 12                                                                                                 |
| Reflections collected                                                       | 90394                                                                                                                              | 45634                                                                                                               |
| Independent reflections                                                     | 19912 [ <i>R</i> <sub>int</sub> = 0.0668]                                                                                          | 14723 [ <i>R</i> <sub>int</sub> = 0.0514]                                                                           |
| data/restraints/parameters                                                  | 19912/562/1004                                                                                                                     | 14723/292/897                                                                                                       |
| Goodness-of-fit on <i>F</i> <sup>2</sup>                                    | 1.067                                                                                                                              | 1.039                                                                                                               |
| <i>R</i> <sub>1</sub> , <i>wR</i> <sub>2</sub> [ <i>I</i> > 2σ( <i>I</i> )] | 0.0664, 0.1831                                                                                                                     | 0.0819, 0.2299                                                                                                      |
| <i>R</i> <sub>1</sub> , <i>wR</i> <sub>2</sub> [all data]                   | 0.0898, 0.1980                                                                                                                     | 0.1021, 0.2538                                                                                                      |
| Largest diff. Peak/hole/e Å <sup>-3</sup>                                   | 4.26/−1.45                                                                                                                         | 2.46/−0.97                                                                                                          |

**Table S7.** Crystallographic data and structure refinement parameters for **SAIOC-1@G11** and **SAIOC-1@G12**.

|                                                                                      | <b>SAIOC-1@G11</b>                                                                                                  | <b>SAIOC-1@G12</b>                                                                                                  |
|--------------------------------------------------------------------------------------|---------------------------------------------------------------------------------------------------------------------|---------------------------------------------------------------------------------------------------------------------|
| Empirical formula                                                                    | C <sub>237</sub> H <sub>382</sub> Al <sub>32</sub> N <sub>18</sub> O <sub>110</sub> Pb <sub>6</sub> S <sub>12</sub> | C <sub>246</sub> H <sub>384</sub> Al <sub>32</sub> N <sub>18</sub> O <sub>110</sub> Pb <sub>6</sub> S <sub>12</sub> |
| Formula weight                                                                       | 7734.80                                                                                                             | 7844.91                                                                                                             |
| Temperature / K                                                                      | 100.00(10)                                                                                                          | 100.00(10)                                                                                                          |
| Crystal system                                                                       | tetragonal                                                                                                          | tetragonal                                                                                                          |
| Space group                                                                          | <i>P4/n</i>                                                                                                         | <i>P4/n</i>                                                                                                         |
| <i>a</i> [Å]                                                                         | 29.9251(3)                                                                                                          | 29.9771(3)                                                                                                          |
| <i>b</i> [Å]                                                                         | 29.9251(3)                                                                                                          | 29.9771(3)                                                                                                          |
| <i>c</i> [Å]                                                                         | 19.4257(2)                                                                                                          | 19.4854(3)                                                                                                          |
| $\alpha$ [°]                                                                         | 90                                                                                                                  | 90                                                                                                                  |
| $\beta$ [°]                                                                          | 90                                                                                                                  | 90                                                                                                                  |
| $\gamma$ [°]                                                                         | 90                                                                                                                  | 90                                                                                                                  |
| <i>V</i> [Å <sup>3</sup> ]                                                           | 17395.9(4)                                                                                                          | 17510.1(4)                                                                                                          |
| <i>Z</i>                                                                             | 2                                                                                                                   | 2                                                                                                                   |
| $\rho_{\text{calcd}}$ [g cm <sup>-3</sup> ]                                          | 1.477                                                                                                               | 1.488                                                                                                               |
| $\mu$ [mm <sup>-1</sup> ]                                                            | 5.253                                                                                                               | 5.225                                                                                                               |
| <i>F</i> (000)                                                                       | 7820.0                                                                                                              | 7932.0                                                                                                              |
| Index ranges                                                                         | $-35 \leq h \leq 18$                                                                                                | $-31 \leq h \leq 32$                                                                                                |
|                                                                                      | $-31 \leq k \leq 26$                                                                                                | $-35 \leq k \leq 35$                                                                                                |
|                                                                                      | $-12 \leq l \leq 22$                                                                                                | $-12 \leq l \leq 22$                                                                                                |
| Reflections collected                                                                | 48707                                                                                                               | 50992                                                                                                               |
| Independent reflections                                                              | 14763 [ <i>R</i> <sub>int</sub> = 0.0773]                                                                           | 14897 [ <i>R</i> <sub>int</sub> = 0.0495]                                                                           |
| data/restraints/parameters                                                           | 14763/455/949                                                                                                       | 14897/127/967                                                                                                       |
| Goodness-of-fit on <i>F</i> <sup>2</sup>                                             | 1.024                                                                                                               | 1.038                                                                                                               |
| <i>R</i> <sub>1</sub> , <i>wR</i> <sub>2</sub> [ <i>I</i> > 2 $\sigma$ ( <i>I</i> )] | 0.0675, 0.1814                                                                                                      | 0.0582, 0.1554                                                                                                      |
| <i>R</i> <sub>1</sub> , <i>wR</i> <sub>2</sub> [all data]                            | 0.0797, 0.1908                                                                                                      | 0.0694, 0.1635                                                                                                      |
| Largest diff. Peak/hole/e Å <sup>-3</sup>                                            | 2.57/-0.94                                                                                                          | 1.84/-0.71                                                                                                          |



**Table S8.** Crystallographic data and structure refinement parameters for **SAIOC-1 @G13** and **SAIOC-1 @G14**.

|                                                                             | <b>SAIOC-1 @G13</b>                                                                                                 | <b>SAIOC-1 @G14</b>                                                                                                 |
|-----------------------------------------------------------------------------|---------------------------------------------------------------------------------------------------------------------|---------------------------------------------------------------------------------------------------------------------|
| Empirical formula                                                           | C <sub>252</sub> H <sub>398</sub> Al <sub>32</sub> N <sub>18</sub> O <sub>110</sub> Pb <sub>6</sub> S <sub>12</sub> | C <sub>242</sub> H <sub>392</sub> Al <sub>32</sub> N <sub>16</sub> O <sub>110</sub> Pb <sub>6</sub> S <sub>12</sub> |
| Formula weight                                                              | 7931.08                                                                                                             | 7776.91                                                                                                             |
| Temperature / K                                                             | 100.00(14)                                                                                                          | 99.99(10)                                                                                                           |
| Crystal system                                                              | tetragonal                                                                                                          | tetragonal                                                                                                          |
| Space group                                                                 | <i>P4/n</i>                                                                                                         | <i>P4/n</i>                                                                                                         |
| <i>a</i> [Å]                                                                | 29.8451(2)                                                                                                          | 30.0170(3)                                                                                                          |
| <i>b</i> [Å]                                                                | 29.8451(2)                                                                                                          | 30.0170(3)                                                                                                          |
| <i>c</i> [Å]                                                                | 19.8380(2)                                                                                                          | 19.5023(4)                                                                                                          |
| $\alpha$ [°]                                                                | 90                                                                                                                  | 90                                                                                                                  |
| $\beta$ [°]                                                                 | 90                                                                                                                  | 90                                                                                                                  |
| $\gamma$ [°]                                                                | 90                                                                                                                  | 90                                                                                                                  |
| <i>V</i> [Å <sup>3</sup> ]                                                  | 17670.3(3)                                                                                                          | 17572.0(5)                                                                                                          |
| <i>Z</i>                                                                    | 2                                                                                                                   | 2                                                                                                                   |
| $\rho_{\text{calcd}}$ [g cm <sup>-3</sup> ]                                 | 1.491                                                                                                               | 1.470                                                                                                               |
| $\mu$ [mm <sup>-1</sup> ]                                                   | 5.181                                                                                                               | 5.201                                                                                                               |
| <i>F</i> (000)                                                              | 8032.0                                                                                                              | 7872.0                                                                                                              |
| Index ranges                                                                | $-32 \leq h \leq 35$                                                                                                | $-38 \leq h \leq 33$                                                                                                |
|                                                                             | $-23 \leq k \leq 35$                                                                                                | $-28 \leq k \leq 31$                                                                                                |
|                                                                             | $-15 \leq l \leq 23$                                                                                                | $-22 \leq l \leq 25$                                                                                                |
| Reflections collected                                                       | 48320                                                                                                               | 58806                                                                                                               |
| Independent reflections                                                     | 15016 [ <i>R</i> <sub>int</sub> = 0.0534]                                                                           | 19373 [ <i>R</i> <sub>int</sub> = 0.0497]                                                                           |
| data/restraints/parameters                                                  | 15016/343/969                                                                                                       | 19373/436/977                                                                                                       |
| Goodness-of-fit on <i>F</i> <sup>2</sup>                                    | 1.028                                                                                                               | 1.047                                                                                                               |
| <i>R</i> <sub>1</sub> , <i>wR</i> <sub>2</sub> [ <i>I</i> > 2σ( <i>I</i> )] | 0.0567, 0.1522                                                                                                      | 0.0701, 0.2031                                                                                                      |
| <i>R</i> <sub>1</sub> , <i>wR</i> <sub>2</sub> [all data]                   | 0.0618, 0.1562                                                                                                      | 0.0973, 0.2239                                                                                                      |
| Largest diff. Peak/hole/e Å <sup>-3</sup>                                   | 3.46/-1.72                                                                                                          | 2.13/-0.67                                                                                                          |

**Table S9.** Crystallographic data and structure refinement parameters for **SAIOC-1-recover**.

|                                                                             | <b>SAIOC-1-recover</b>                                                                                              |
|-----------------------------------------------------------------------------|---------------------------------------------------------------------------------------------------------------------|
| Empirical formula                                                           | C <sub>216</sub> H <sub>358</sub> Al <sub>32</sub> N <sub>12</sub> O <sub>110</sub> Pb <sub>6</sub> S <sub>12</sub> |
| Formula weight                                                              | 7374.34                                                                                                             |
| Temperature / K                                                             | 99.95(16)                                                                                                           |
| Crystal system                                                              | tetragonal                                                                                                          |
| Space group                                                                 | <i>P</i> 4/ <i>n</i>                                                                                                |
| <i>a</i> [Å]                                                                | 29.8435(5)                                                                                                          |
| <i>b</i> [Å]                                                                | 29.8435(5)                                                                                                          |
| <i>c</i> [Å]                                                                | 19.3447(4)                                                                                                          |
| $\alpha$ [°]                                                                | 90                                                                                                                  |
| $\beta$ [°]                                                                 | 90                                                                                                                  |
| $\gamma$ [°]                                                                | 90                                                                                                                  |
| <i>V</i> [Å <sup>3</sup> ]                                                  | 17229.1(7)                                                                                                          |
| <i>Z</i>                                                                    | 2                                                                                                                   |
| $\rho_{\text{calcd}}$ [g cm <sup>-3</sup> ]                                 | 1.421                                                                                                               |
| $\mu$ [mm <sup>-1</sup> ]                                                   | 5.282                                                                                                               |
| <i>F</i> (000)                                                              | 7436.0                                                                                                              |
|                                                                             | $-36 \leq h \leq 36$                                                                                                |
| Index ranges                                                                | $-23 \leq k \leq 38$                                                                                                |
|                                                                             | $-11 \leq l \leq 24$                                                                                                |
| Reflections collected                                                       | 51617                                                                                                               |
| Independent reflections                                                     | 18988 [ <i>R</i> <sub>int</sub> = 0.0475]                                                                           |
| data/restraints/parameters                                                  | 18988/744/887                                                                                                       |
| Goodness-of-fit on <i>F</i> <sup>2</sup>                                    | 1.003                                                                                                               |
| <i>R</i> <sub>1</sub> , <i>wR</i> <sub>2</sub> [ <i>I</i> > 2σ( <i>I</i> )] | 0.0917, 0.2668                                                                                                      |
| <i>R</i> <sub>1</sub> , <i>wR</i> <sub>2</sub> [all data]                   | 0.1508, 0.3196                                                                                                      |
| Largest diff. Peak/hole/e Å <sup>-3</sup>                                   | 1.92/-0.66                                                                                                          |

**Table S10.** Selected bond lengths and bond valance summary (BVS) analysis for Al<sup>3+</sup>, Pb<sup>2+</sup> and  $\mu_2$ -OH groups in **Al<sub>12</sub>Pb<sub>2</sub>**.

| Atom                                           | Atom             | Length/Å | Bond Valence | Atom | Atom            | Length/Å | Bond Valence |
|------------------------------------------------|------------------|----------|--------------|------|-----------------|----------|--------------|
| Al1                                            | O2               | 1.807    | 0.65598      | Al2  | O2              | 1.844    | 0.59356      |
| Al1                                            | O7 <sup>1</sup>  | 1.913    | 0.49258      | Al2  | O7 <sup>1</sup> | 1.898    | 0.51295      |
| Al1                                            | O16 <sup>1</sup> | 1.847    | 0.58876      | Al2  | O5 <sup>1</sup> | 1.798    | 0.67213      |
| Al1                                            | O13 <sup>1</sup> | 1.839    | 0.60163      | Al2  | O5              | 1.787    | 0.69242      |
| Al1                                            | O1               | 1.758    | 0.74887      | Al2  | O4              | 1.772    | 0.72106      |
| Al1                                            |                  |          | 3.08782      | Al2  |                 |          | 3.19213      |
| Atom                                           | Atom             | Length/Å | Bond Valence | Atom | Atom            | Length/Å | Bond Valence |
| Al3                                            | O5               | 1.756    | 0.75293      | Al4  | O8              | 1.79     | 0.68683      |
| Al3                                            | O8               | 1.763    | 0.73882      | Al4  | O11             | 1.813    | 0.64543      |
| Al3                                            | O3               | 1.742    | 0.78196      | Al4  | O9              | 1.672    | 0.94482      |
| Al3                                            | O6               | 1.776    | 0.71331      | Al4  | O10             | 1.684    | 0.91467      |
| Al3                                            |                  |          | 2.98702      | Al4  |                 |          | 3.19175      |
| Atom                                           | Atom             | Length/Å | Bond Valence | Atom | Atom            | Length/Å | Bond Valence |
| Al5                                            | O7               | 1.913    | 0.49258      | Al6  | O16             | 1.837    | 0.60489      |
| Al5                                            | O8               | 1.832    | 0.61312      | Al6  | O13             | 1.763    | 0.73882      |
| Al5                                            | O12              | 1.779    | 0.70755      | Al6  | O15             | 1.705    | 0.8642       |
| Al5                                            | O13              | 1.795    | 0.67761      | Al6  | O14             | 1.683    | 0.91715      |
| Al5                                            | O11              | 1.888    | 0.52701      |      |                 |          |              |
| Al5                                            |                  |          | 3.01786      | Al6  |                 |          | 3.12506      |
| Atom                                           | Atom             | Length/Å | Bond Valence | Atom | Atom            | Length/Å | Bond Valence |
| Pb1                                            | O7               | 2.182    | 0.71222      | O2   | Al1             | 1.807    | 0.65598      |
| Pb1                                            | O12              | 2.438    | 0.3991       | O2   | Al2             | 1.844    | 0.59356      |
| Pb1                                            | O6               | 2.553    | 0.30767      |      |                 |          |              |
| Pb1                                            | O4 <sup>1</sup>  | 2.508    | 0.34064      |      |                 |          |              |
| Pb1                                            | O1 <sup>1</sup>  | 2.544    | 0.314        |      |                 |          |              |
| Pb1                                            |                  |          | 2.07363      | O2   |                 |          | 1.24954      |
| Symmetric code: <sup>1</sup> 3/2-X, 1/2-Y, 1-Z |                  |          |              |      |                 |          |              |

**Table S11.** Selected bond lengths and bond valence summary (BVS) analysis for Al<sup>3+</sup>, Pb<sup>2+</sup> and  $\mu_2$ -OH groups in **Al<sub>12</sub>Pb<sub>4</sub>**.

| Atom                                         | Atom             | Length/Å | Bond Valence | Atom | Atom             | Length/Å | Bond Valence |
|----------------------------------------------|------------------|----------|--------------|------|------------------|----------|--------------|
| Al1                                          | O18              | 1.781    | 0.70374      | Al2  | O18              | 1.78     | 0.70564      |
| Al1                                          | O12 <sup>1</sup> | 1.988    | 0.4022       | Al2  | O14              | 1.804    | 0.66132      |
| Al1                                          | O6               | 1.794    | 0.67944      | Al2  | O7 <sup>1</sup>  | 1.978    | 0.41322      |
| Al1                                          | O21              | 1.77     | 0.72497      | Al2  | O16              | 1.882    | 0.53562      |
| Al1                                          | O19              | 1.882    | 0.53562      | Al2  | O17              | 1.777    | 0.71139      |
| Al1                                          |                  |          | 3.04597      | Al2  |                  |          | 3.02719      |
| Atom                                         | Atom             | Length/Å | Bond Valence | Atom | Atom             | Length/Å | Bond Valence |
| Al3                                          | O11              | 1.777    | 0.71139      | Al4  | O18 <sup>1</sup> | 1.809    | 0.65245      |
| Al3                                          | O13              | 1.78     | 0.70564      | Al4  | O11              | 1.814    | 0.64369      |
| Al3                                          | O14              | 1.798    | 0.67213      | Al4  | O12              | 1.863    | 0.56385      |
| Al3                                          | O12              | 2.011    | 0.37796      | Al4  | O71              | 1.865    | 0.56081      |
| Al3                                          | O15              | 1.886    | 0.52986      | Al4  | O10              | 1.813    | 0.64543      |
| Al3                                          |                  |          | 2.99698      | Al4  |                  |          | 3.06622      |
| Atom                                         | Atom             | Length/Å | Bond Valence | Atom | Atom             | Length/Å | Bond Valence |
| Al5                                          | O11              | 1.786    | 0.69429      | Al6  | O5               | 1.755    | 0.75497      |
| Al5                                          | O6               | 1.793    | 0.68128      | Al6  | O4               | 1.764    | 0.73682      |
| Al5                                          | O7               | 1.973    | 0.41884      | Al6  | O14 <sup>1</sup> | 1.767    | 0.73087      |
| Al5                                          | O20              | 1.88     | 0.53853      | Al6  | O6               | 1.772    | 0.72106      |
| Al5                                          | O8               | 1.772    | 0.72106      |      |                  |          |              |
| Al5                                          |                  |          | 3.054        | Al6  |                  |          | 2.94373      |
| Atom                                         | Atom             | Length/Å | Bond Valence | Atom | Atom             | Length/Å | Bond Valence |
| Pb1                                          | O5               | 2.555    | 0.30628      | Pb2  | O13              | 2.42     | 0.41568      |
| Pb1                                          | O7               | 2.301    | 0.54411      | Pb2  | O4 <sup>1</sup>  | 2.278    | 0.57318      |
| Pb1                                          | O17 <sup>1</sup> | 2.426    | 0.41008      | Pb2  | O12              | 2.258    | 0.59971      |
| Pb1                                          | O8               | 2.462    | 0.378        | Pb2  | O21 <sup>1</sup> | 2.46     | 0.37972      |
| Pb1                                          | O9               | 2.48     | 0.36292      |      |                  |          |              |
| Pb1                                          | O22              | 2.49     | 0.3548       |      |                  |          |              |
| Pb1                                          |                  |          | 2.3562       | Pb2  |                  |          | 1.96829      |
| Atom                                         | Atom             | Length/Å | Bond Valence |      |                  |          |              |
| O4                                           | Pb2              | 2.278    | 0.57318      |      |                  |          |              |
| O4                                           | Al6              | 1.764    | 0.73682      |      |                  |          |              |
| O4                                           |                  |          | 1.31         |      |                  |          |              |
| Symmetric code: <sup>1</sup> 1/2-X,1/2-Y,1-Z |                  |          |              |      |                  |          |              |

**Table S12.** Selected bond lengths and bond valance summary (BVS) analysis for Al<sup>3+</sup>, Pb<sup>2+</sup> and  $\mu_2$ -OH groups in **SAIOC-1**.

| Atom       | Atom             | Length/Å | Bond Valence   | Atom       | Atom             | Length/Å | Bond Valence   |
|------------|------------------|----------|----------------|------------|------------------|----------|----------------|
| Al1        | O11              | 1.785    | 0.69617        | Al2        | O11              | 1.778    | 0.70947        |
| Al1        | O11 <sup>2</sup> | 1.785    | 0.69617        | Al2        | O15              | 1.727    | 0.81432        |
| Al1        | O12              | 2.055    | 0.33558        | Al2        | O10              | 1.735    | 0.7969         |
| Al1        | O23              | 1.779    | 0.70755        | Al2        | O00Y             | 1.771    | 0.72302        |
| Al1        | O14              | 1.831    | 0.61478        |            |                  |          |                |
| <b>Al1</b> |                  |          | <b>3.05025</b> | <b>Al2</b> |                  |          | <b>3.0437</b>  |
| Atom       | Atom             | Length/Å | Bond Valence   | Atom       | Atom             | Length/Å | Bond Valence   |
| Al3        | O8               | 1.833    | 0.61147        | Al4        | O22 <sup>1</sup> | 1.837    | 0.60489        |
| Al3        | O9               | 1.875    | 0.54585        | Al4        | O16              | 1.926    | 0.47557        |
| Al3        | O15 <sup>1</sup> | 1.792    | 0.68312        | Al4        | O9               | 1.822    | 0.62992        |
| Al3        | O10              | 1.807    | 0.65598        | Al4        | O10              | 1.832    | 0.61312        |
| Al3        | O14 <sup>1</sup> | 1.853    | 0.57929        | Al4        | O17              | 1.788    | 0.69055        |
| <b>Al3</b> |                  |          | <b>3.07572</b> | <b>Al4</b> |                  |          | <b>3.01405</b> |
| Atom       | Atom             | Length/Å | Bond Valence   | Atom       | Atom             | Length/Å | Bond Valence   |
| Al5        | O22 <sup>1</sup> | 1.813    | 0.64543        | Al6        | O16              | 1.895    | 0.51713        |
| Al5        | O24              | 1.87     | 0.55328        | Al6        | O9 <sup>2</sup>  | 1.83     | 0.61645        |
| Al5        | O16              | 1.905    | 0.50334        | Al6        | O15              | 1.854    | 0.57773        |
| Al5        | O18              | 1.773    | 0.71912        | Al6        | O19              | 1.837    | 0.60489        |
| Al5        | O19              | 1.793    | 0.68128        | Al6        | O20              | 1.785    | 0.69617        |
| <b>Al5</b> |                  |          | <b>3.10245</b> | <b>Al6</b> |                  |          | <b>3.01237</b> |
| Atom       | Atom             | Length/Å | Bond Valence   | Atom       | Atom             | Length/Å | Bond Valence   |
| Al7        | O22              | 1.731    | 0.80556        | Al8        | O23              | 1.787    | 0.69242        |
| Al7        | O23              | 1.765    | 0.73484        | Al8        | O23 <sup>1</sup> | 1.812    | 0.64718        |
| Al7        | O27              | 1.793    | 0.68128        | Al8        | O24              | 1.826    | 0.62315        |
| Al7        | O19              | 1.739    | 0.78833        | Al8        | O25              | 2.058    | 0.33287        |
|            |                  |          |                | Al8        | O26              | 1.773    | 0.71912        |
| <b>Al7</b> |                  |          | <b>3.01001</b> | <b>Al8</b> |                  |          | <b>3.01473</b> |
| Atom       | Atom             | Length/Å | Bond Valence   | Atom       | Atom             | Length/Å | Bond Valence   |
| Pb1        | O12              | 2.225    | 0.6462         | Pb2        | O16              | 2.248    | 0.61343        |
| Pb1        | O13 <sup>3</sup> | 2.44     | 0.39729        | Pb2        | O18              | 2.444    | 0.39372        |
| Pb1        | O133             | 2.44     | 0.39729        | Pb2        | O20              | 2.466    | 0.3746         |
| Pb1        | O13 <sup>1</sup> | 2.44     | 0.39729        | Pb2        | O17              | 2.441    | 0.3964         |
| Pb1        | O13 <sup>2</sup> | 2.44     | 0.39729        | Pb2        | O21              | 2.643    | 0.25099        |
| <b>Pb1</b> |                  |          | <b>2.23538</b> | <b>Pb2</b> |                  |          | <b>2.02913</b> |



| Atom                                                                                            | Atom             | Length/Å | Bond<br>Valence |            |      |          |                 |
|-------------------------------------------------------------------------------------------------|------------------|----------|-----------------|------------|------|----------|-----------------|
| Pb3                                                                                             | O25              | 2.251    | 0.60928         |            |      |          |                 |
| Pb3                                                                                             | O26              | 2.444    | 0.39372         |            |      |          |                 |
| Pb3                                                                                             | O26 <sup>1</sup> | 2.444    | 0.39372         |            |      |          |                 |
| Pb3                                                                                             | O26 <sup>2</sup> | 2.444    | 0.39372         |            |      |          |                 |
| Pb3                                                                                             | O26 <sup>3</sup> | 2.444    | 0.39372         |            |      |          |                 |
| <b>Pb3</b>                                                                                      |                  |          | <b>2.18414</b>  |            |      |          |                 |
| Atom                                                                                            | Atom             | Length/Å | Bond<br>Valence | Atom       | Atom | Length/Å | Bond<br>Valence |
| O24                                                                                             | Al5              | 1.87     | 0.55328         | O14        | Al3  | 1.854    | 0.57773         |
| O24                                                                                             | Al8              | 1.826    | 0.62315         | O14        | Al1  | 1.831    | 0.61478         |
| <b>O24</b>                                                                                      |                  |          | <b>1.17643</b>  | <b>O14</b> |      |          | <b>1.19251</b>  |
| Symmetric code: <sup>1</sup> +Y,1/2-X,+Z; <sup>2</sup> 1/2-Y,+X,+Z; <sup>3</sup> 1/2-X,1/2-Y,+Z |                  |          |                 |            |      |          |                 |

**Table S13.** Hydrogen bond parameters for **Al<sub>12</sub>Pb<sub>2</sub>**.

| <b>D–H...A</b> | <b>d(D–H)</b> | <b>d(H...A)</b> | <b>d(D–A)</b> | <b>∠ (D–H...A)</b> |
|----------------|---------------|-----------------|---------------|--------------------|
| O2–H2...O3     | 0.95          | 2.15            | 2.848(9)      | 129                |
| C14–H14...O11  | 1.00          | 2.50            | 3.139(5)      | 121                |

**Table S14.** Hydrogen bond parameters for **Al<sub>12</sub>Pb<sub>4</sub>**.

| <b>D–H...A</b> | <b>d(D–H)</b> | <b>d(H...A)</b> | <b>d(D–A)</b> | <b>∠ (D–H...A)</b> |
|----------------|---------------|-----------------|---------------|--------------------|
| O4–H4...O3     | 0.95          | 1.74            | 2.662(6)      | 161                |
| C2–H2...O19    | 1.00          | 2.45            | 2.959(8)      | 111                |
| C5–H5...O16    | 1.00          | 2.57            | 2.931(8)      | 101                |
| C15–H15...O15  | 1.00          | 2.59            | 2.940(6)      | 101                |
| C24–H24...O9   | 0.95          | 2.40            | 2.731(16)     | 100                |
| C26–H26A...O22 | 0.98          | 2.02            | 2.78(2)       | 134                |
| C27–H27...O20  | 1.00          | 2.50            | 2.968(10)     | 108                |
| C29–H29C...O2  | 0.98          | 2.59            | 3.336(8)      | 133                |
| C30–H30...O3   | 1.00          | 2.38            | 3.262(7)      | 126                |
| C37–H37...O1   | 0.95          | 2.53            | 3.275(9)      | 136                |

**Table S15.** Hydrogen bond parameters for **SAIOC-1**.

| <b>D–H...A</b> | <b>d(D–H)</b> | <b>d(H...A)</b> | <b>d(D–A)</b> | <b>∠ (D–H...A)</b> |
|----------------|---------------|-----------------|---------------|--------------------|
| O14–H14...O7   | 0.95          | 1.71            | 2.567(11)     | 148                |
| O24–H24...O28  | 0.94          | 1.77            | 2.675(7)      | 162                |
| C4–H4A...O4    | 0.99          | 2.02            | 2.50(3)       | 107                |
| C15–H15...O7   | 1.00          | 2.46            | 3.266(14)     | 137                |
| C18–H18...O8   | 1.00          | 2.49            | 3.439(12)     | 157                |
| C21–H21...O9   | 1.00          | 2.57            | 3.163(10)     | 118                |
| C28–H28...O2   | 0.95          | 2.53            | 2.902(8)      | 103                |
| C30–H30B...O1  | 0.99          | 2.38            | 2.82(2)       | 107                |
| C32–H32A...N2  | 0.98          | 2.48            | 2.95(3)       | 109                |
| C37–H37...O24  | 1.00          | 2.56            | 3.124(10)     | 116                |
| C41–H41B...O3  | 0.99          | 2.29            | 3.15(4)       | 146                |
| C42–H42A...O3  | 0.99          | 2.59            | 3.38(3)       | 137                |
| C50–H50...O5   | 0.95          | 2.55            | 2.910(11)     | 103                |
| C50–H50...O5   | 0.95          | 2.40            | 3.209(12)     | 143                |
